# Supplementary material for: Rare variants contribute disproportionately to quantitative trait variation in yeast
Source: eLife journal article supplement (doi:10.7554/elife.49212), 2019-10-24

6-azauracil    193 total QTL    |    116 joint QTL

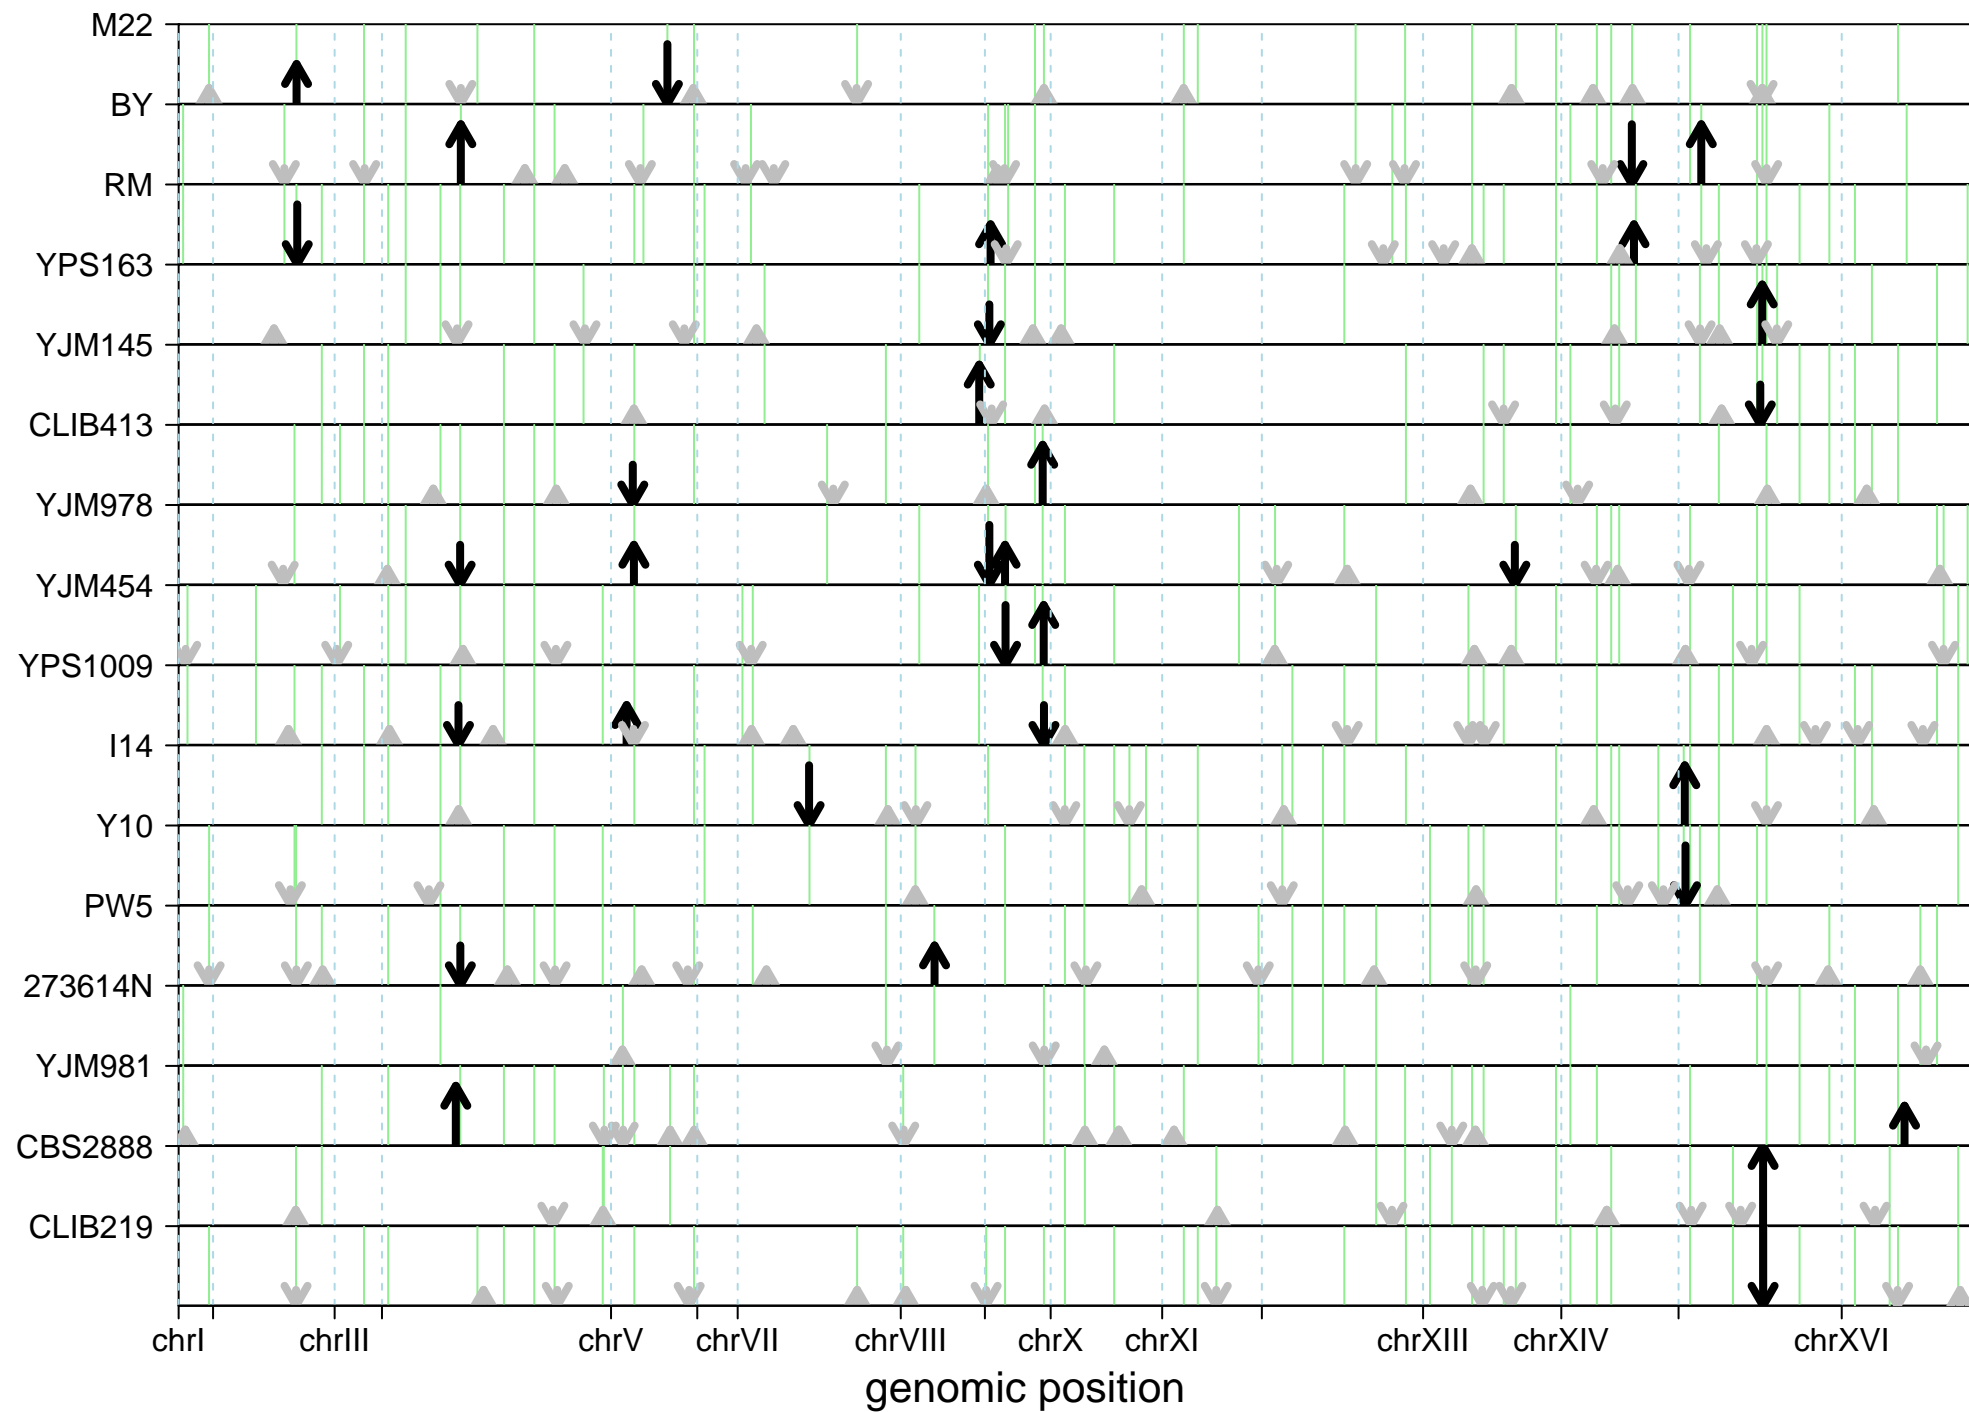

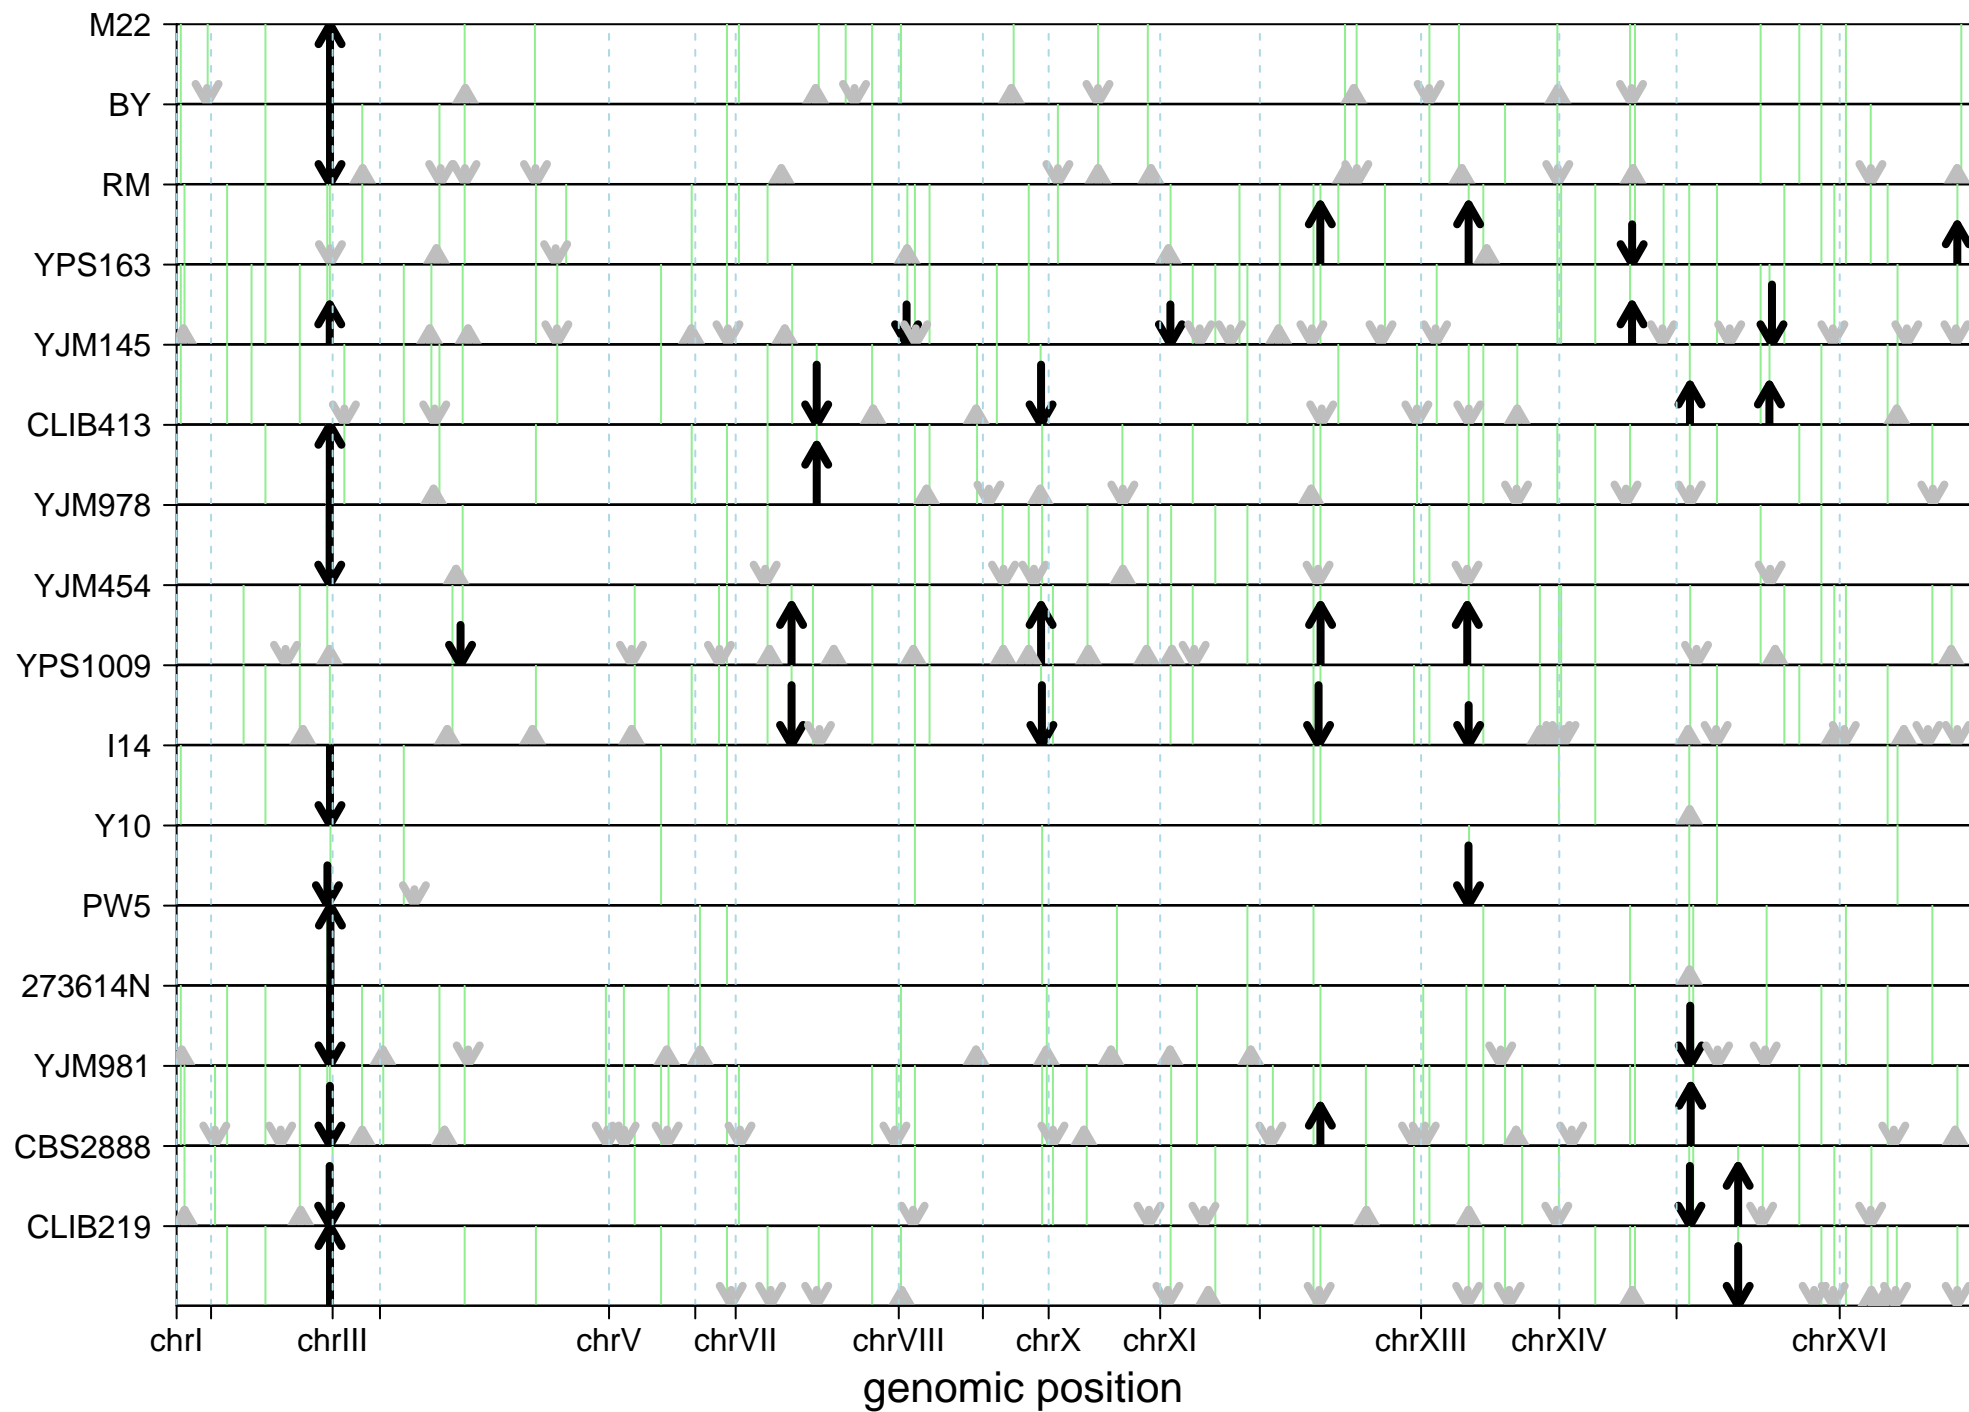

Caffeine 255 total QTL | 153 joint QTL

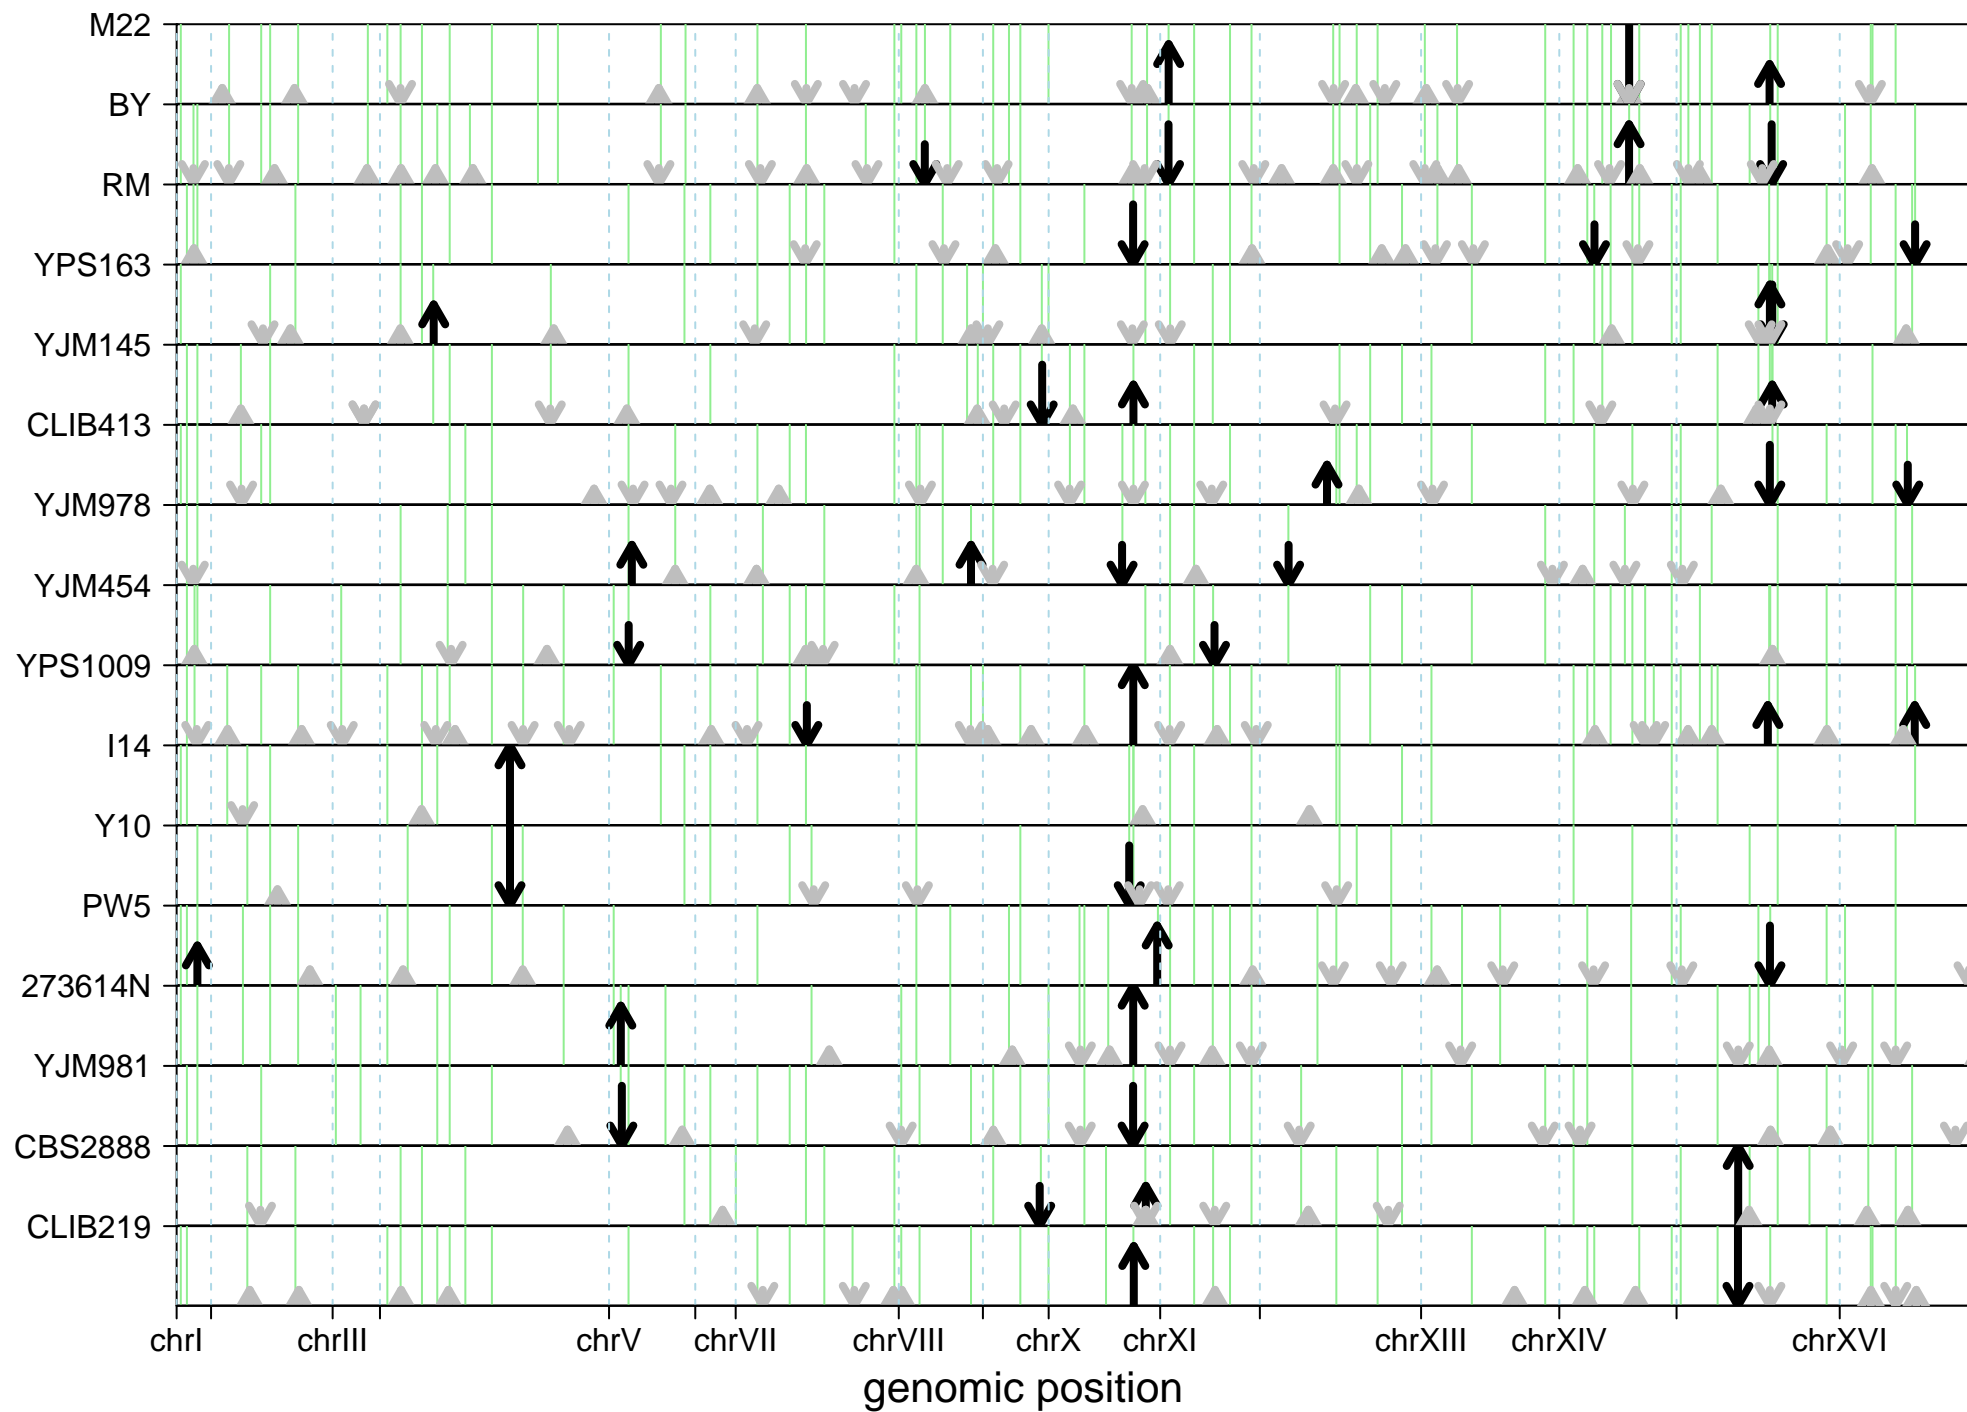

Cobalt Chloride 266 total QTL | 165 joint QTL

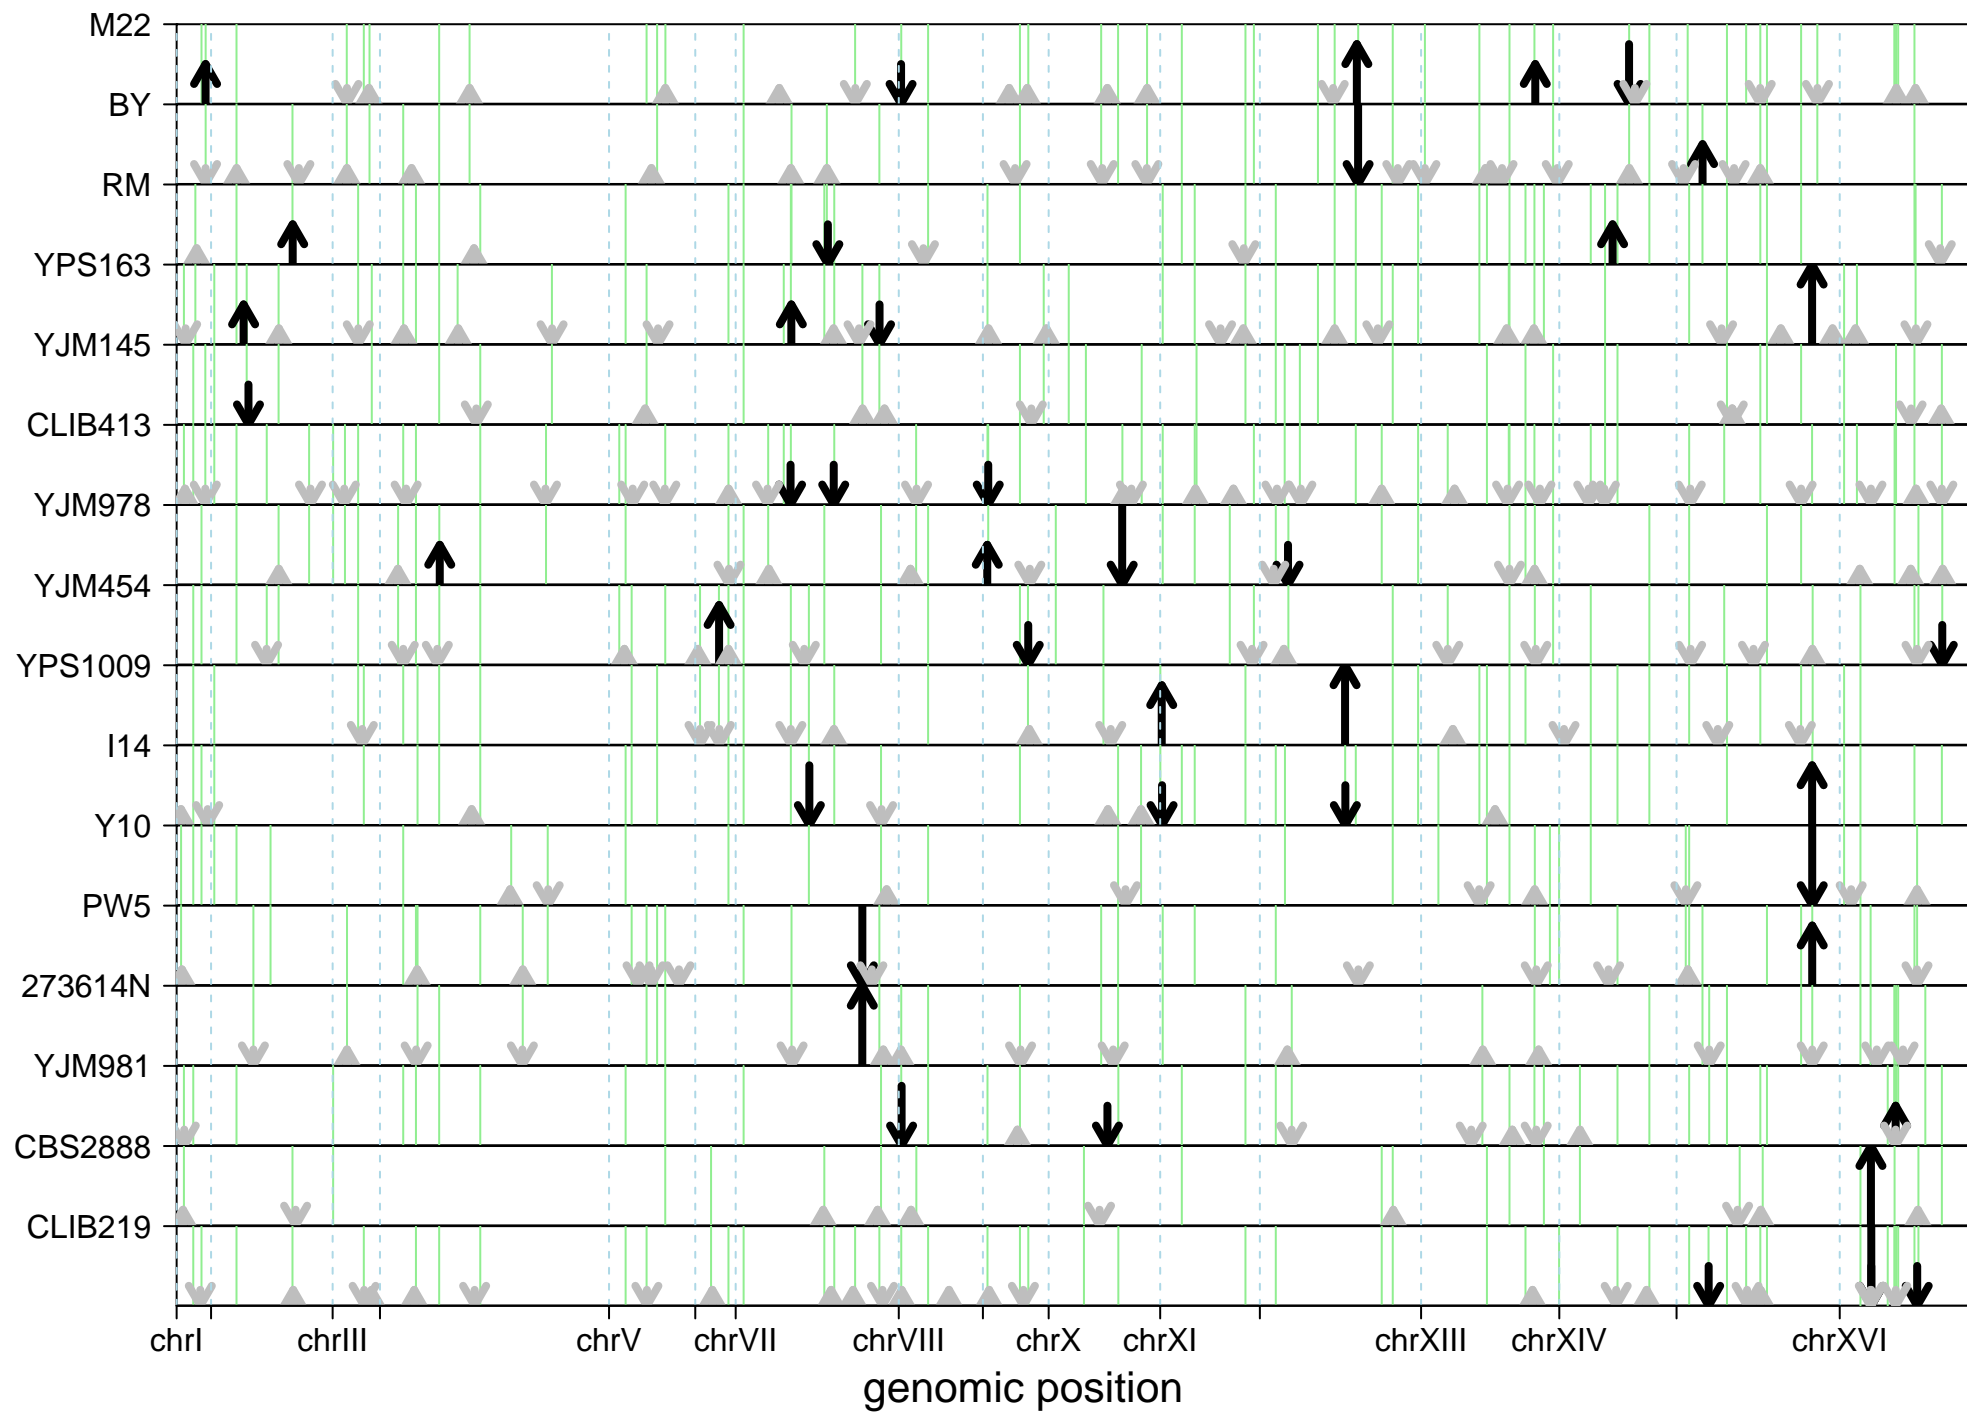

Congo Red    176 total QTL    |    109 joint QTL

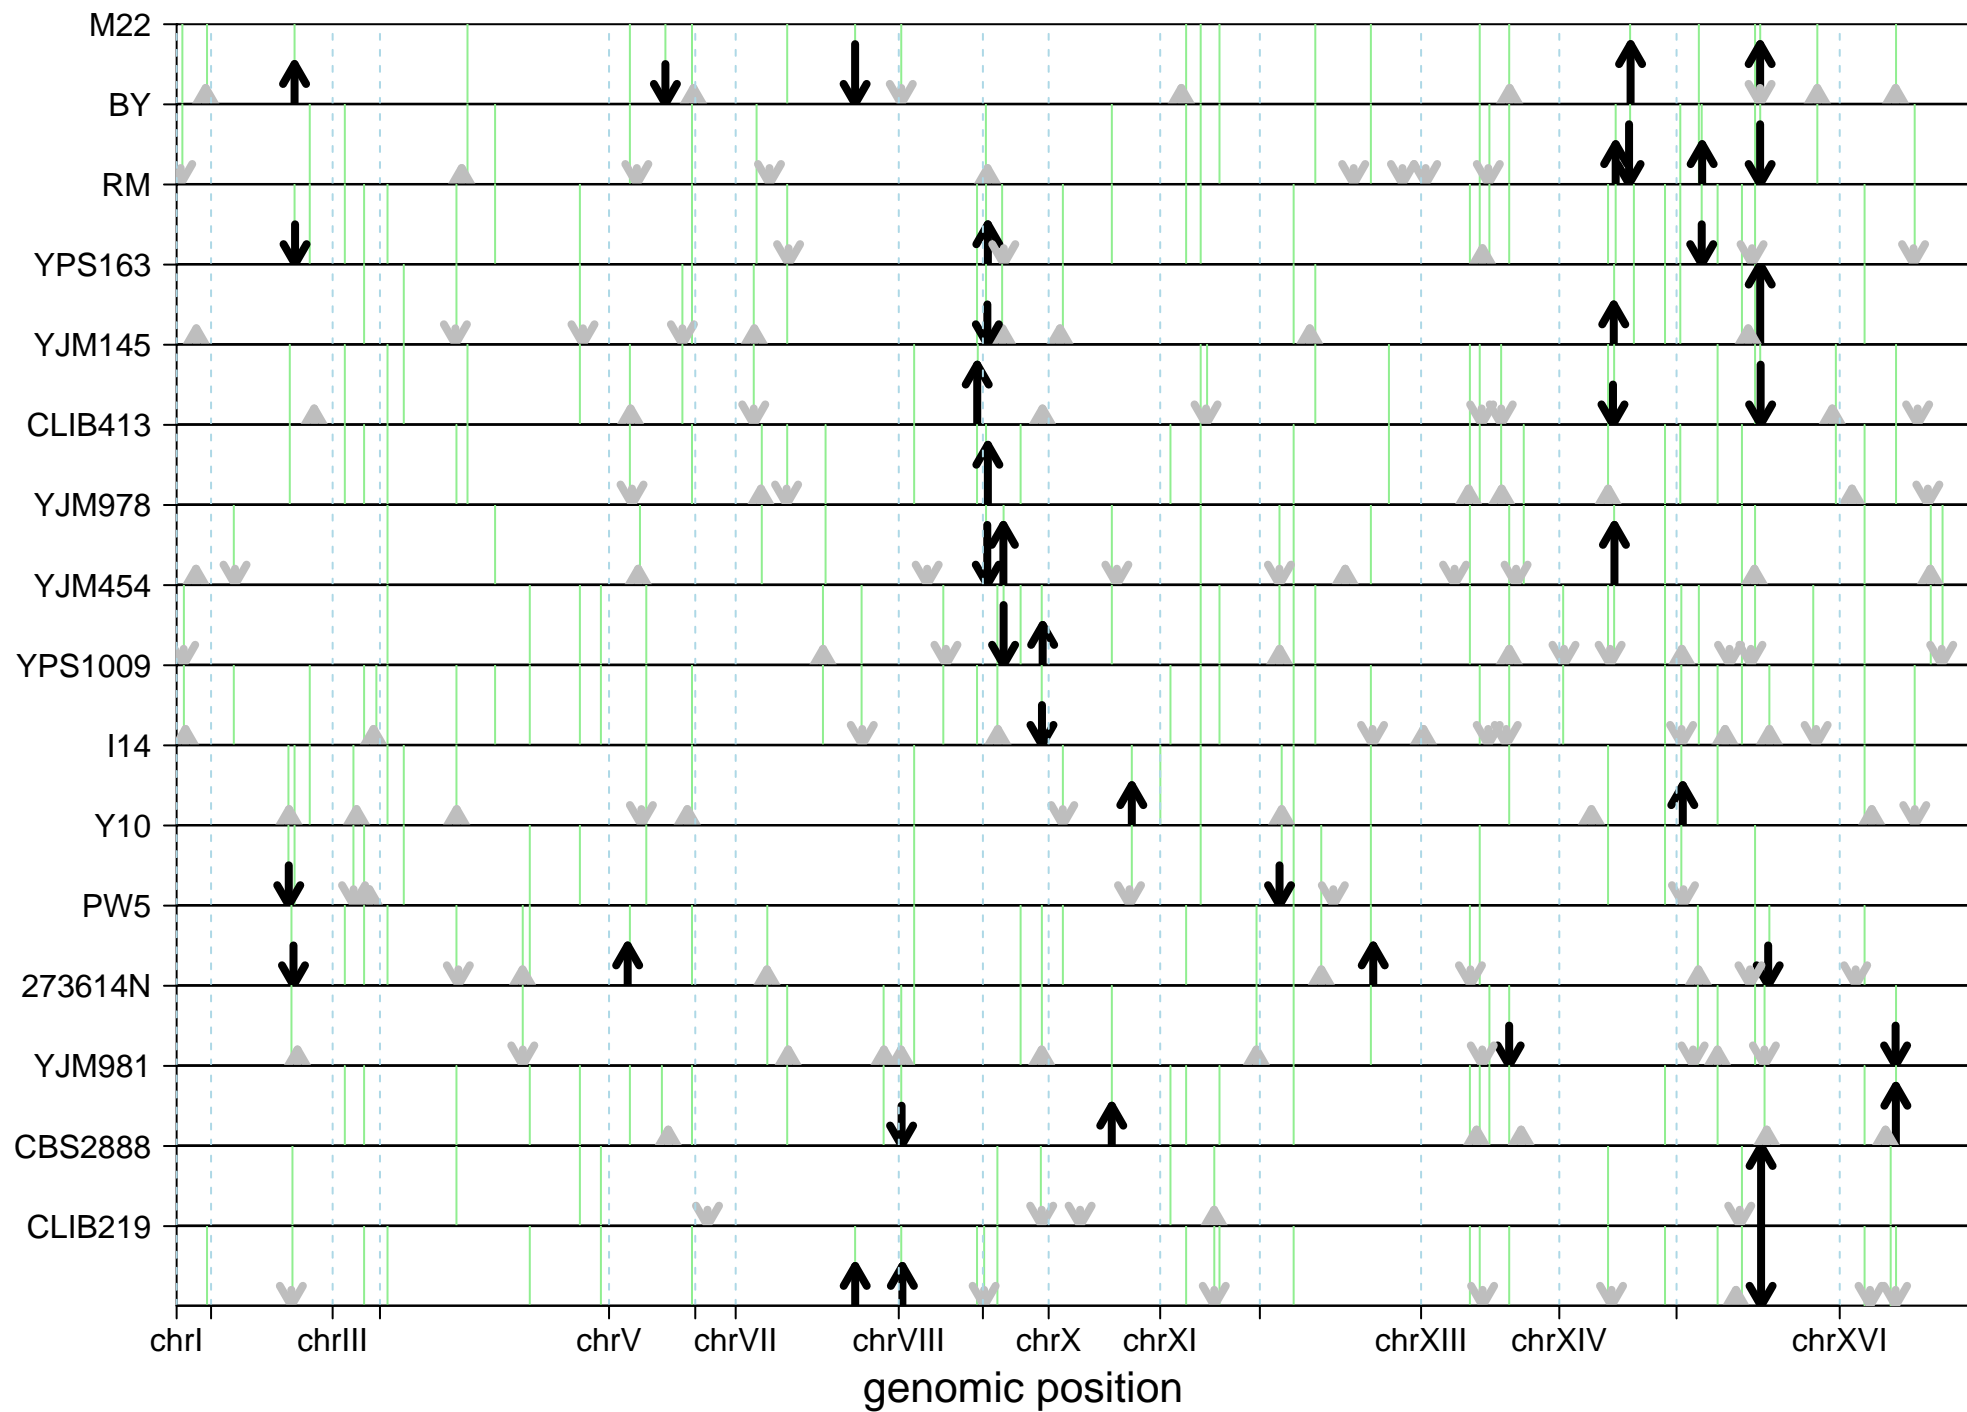

Copper Sulfate 104 total QTL | 76 joint QTL

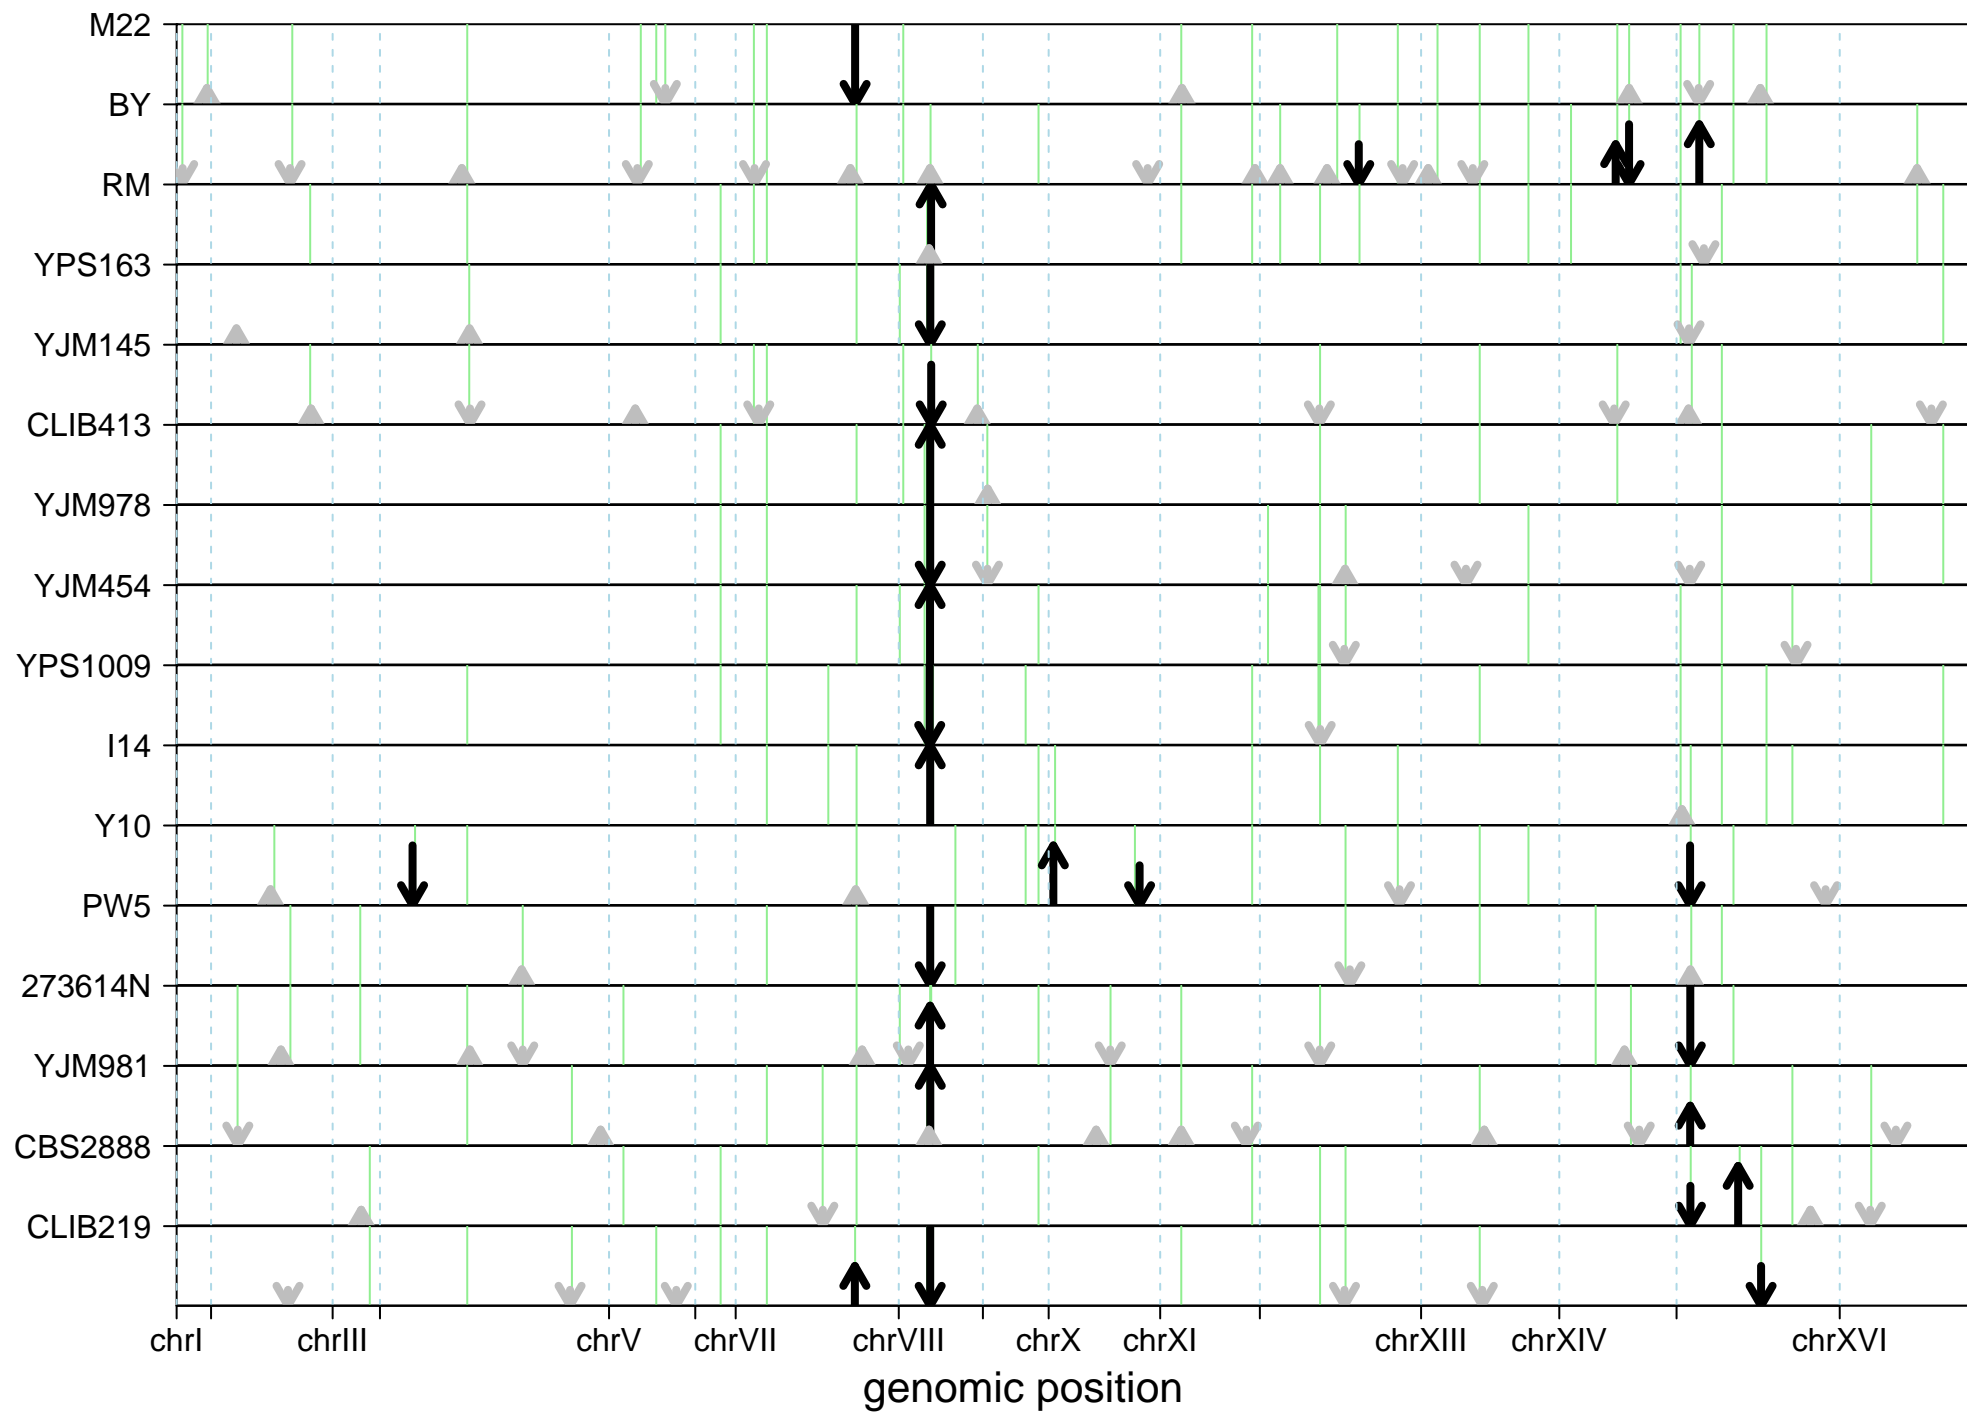

Diamide 188 total QTL | 122 joint QTL

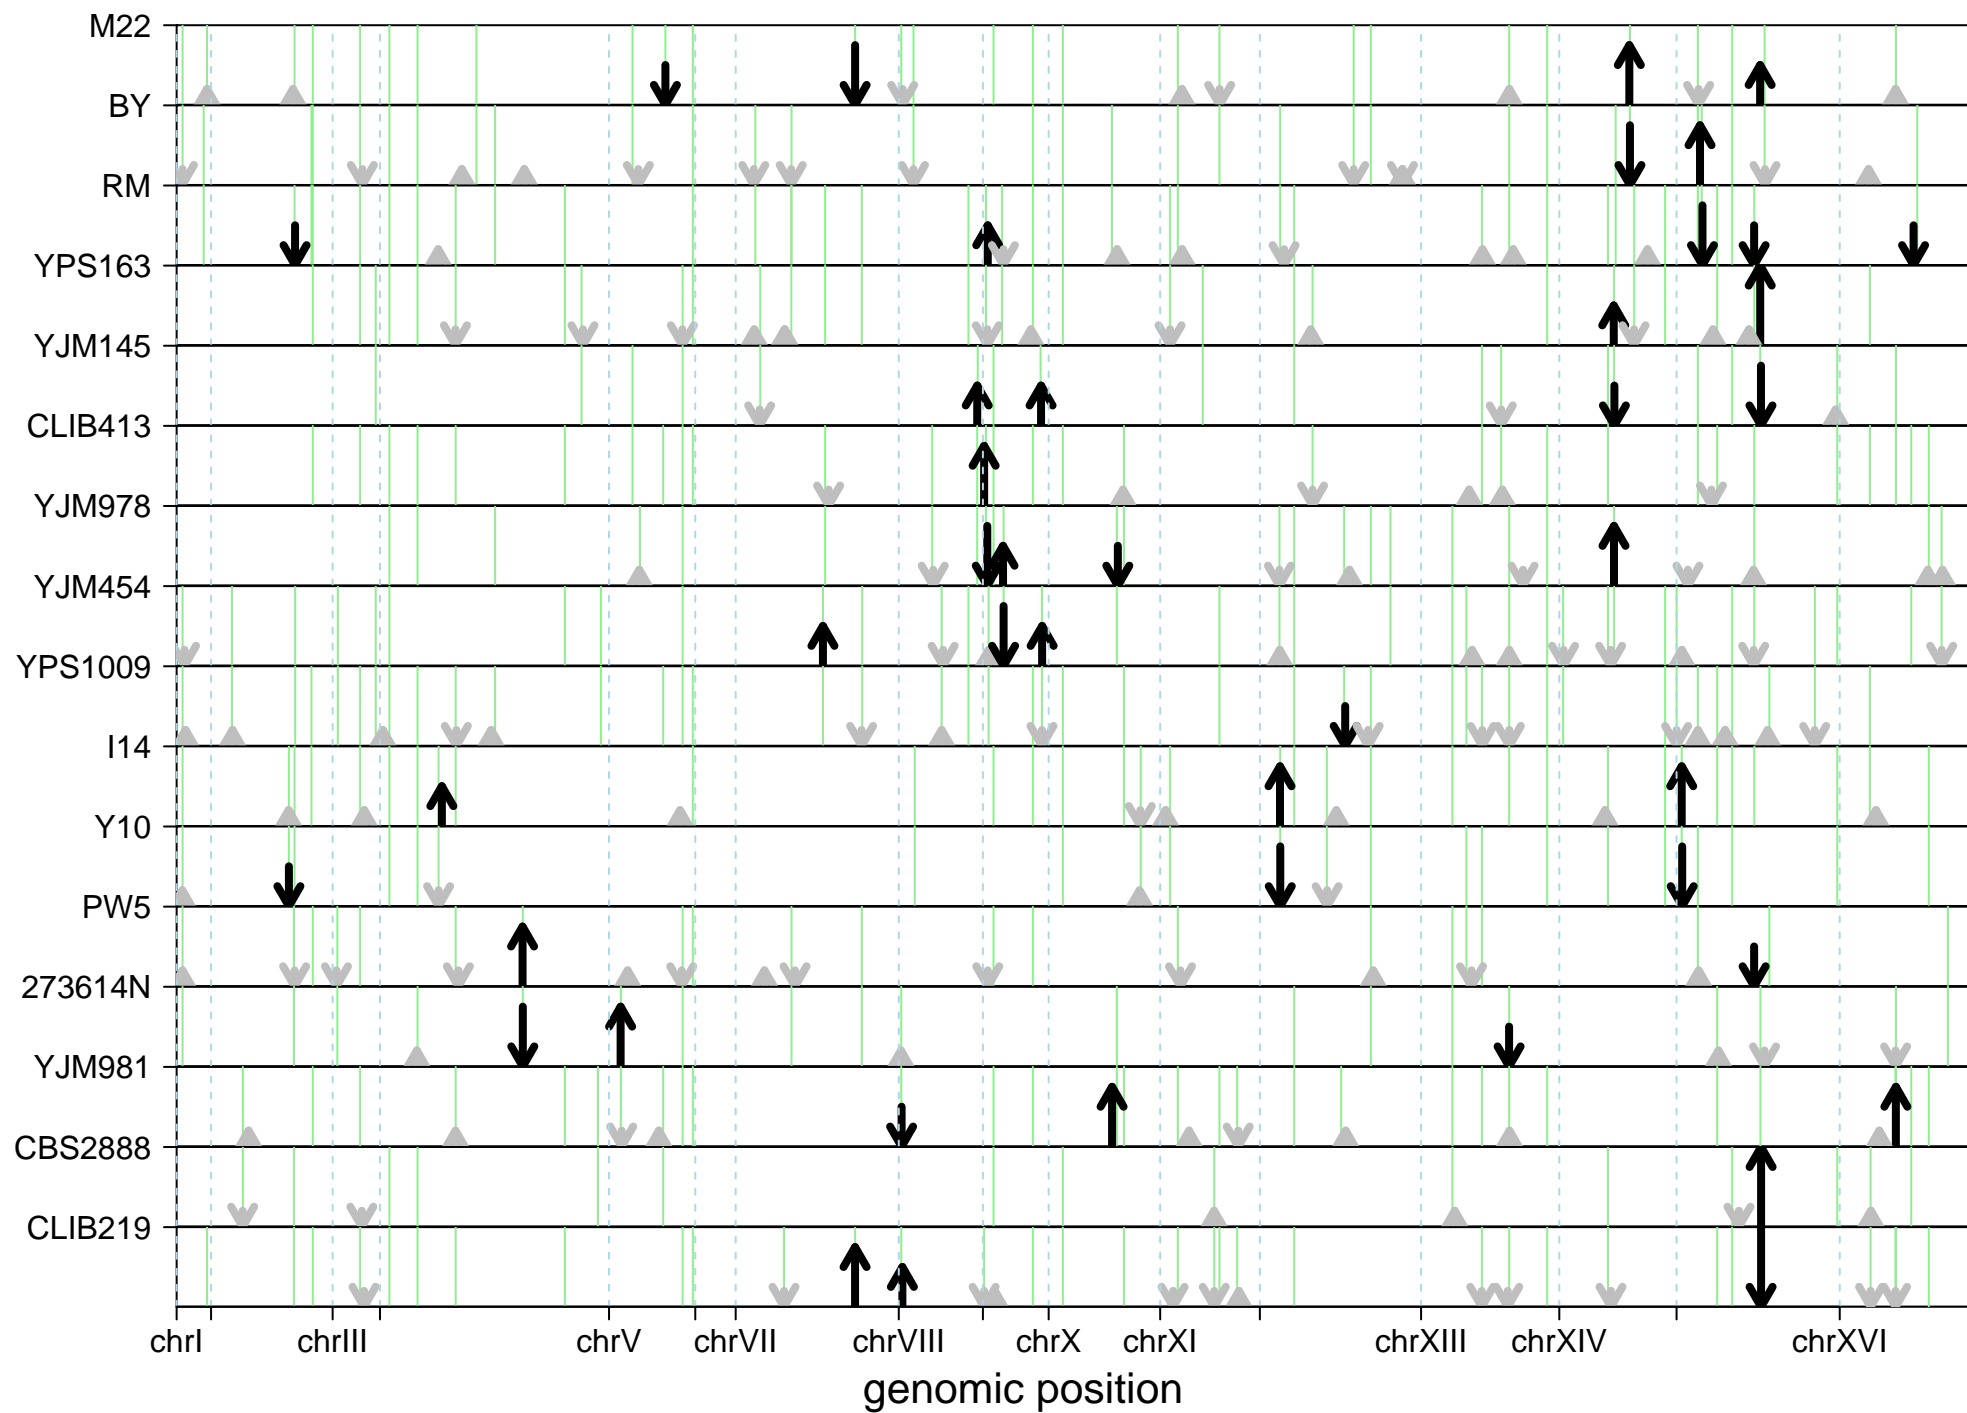

EGTA 266 total QTL | 140 joint QTL

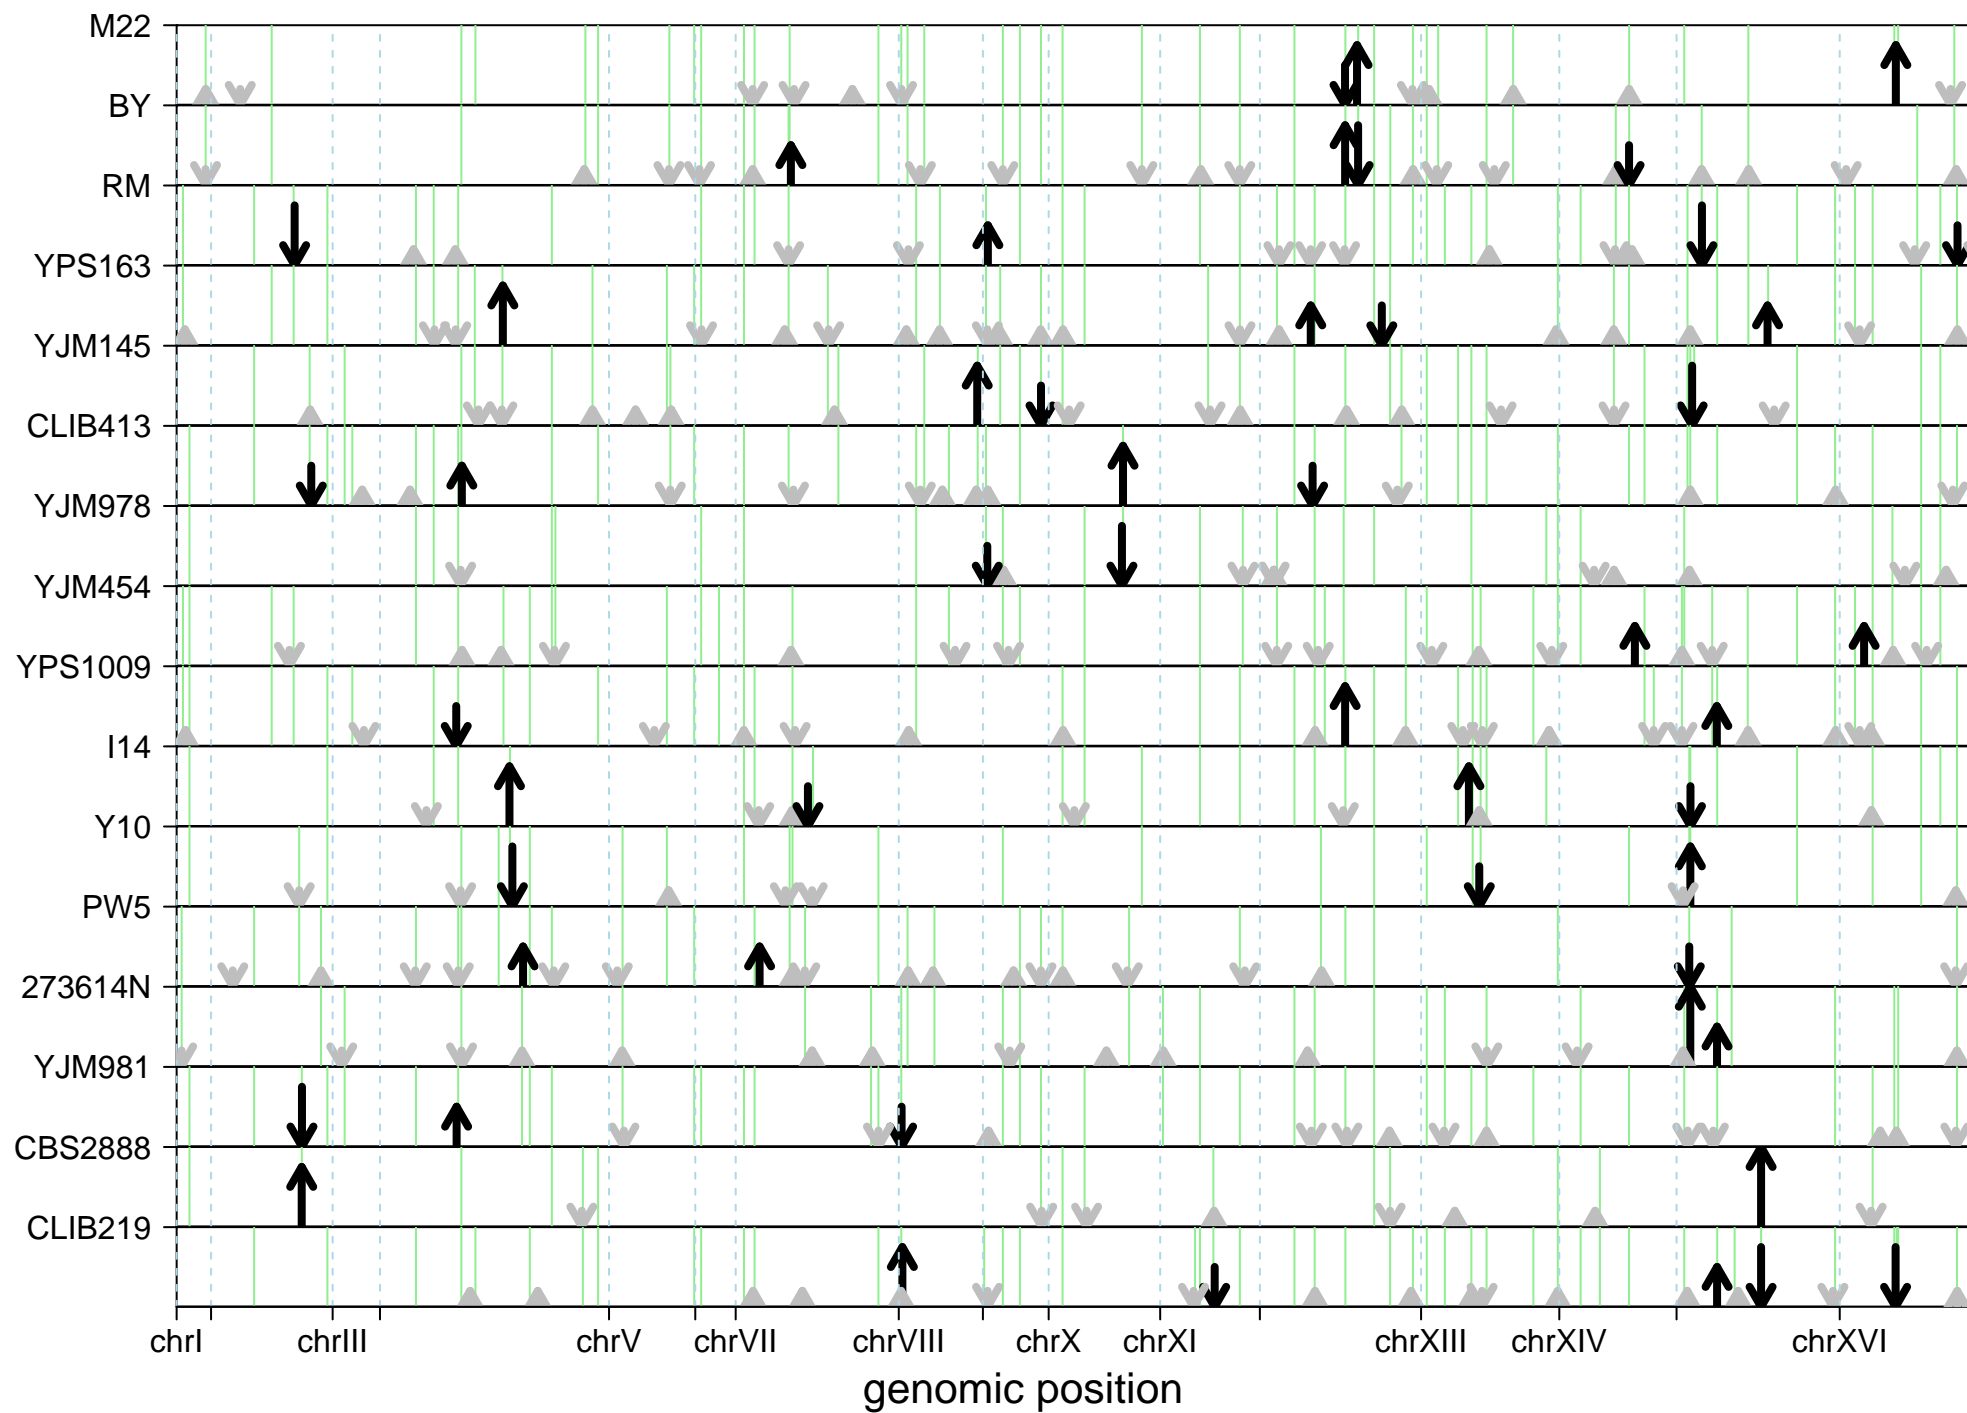



EtOH    190 total QTL    |    122 joint QTL

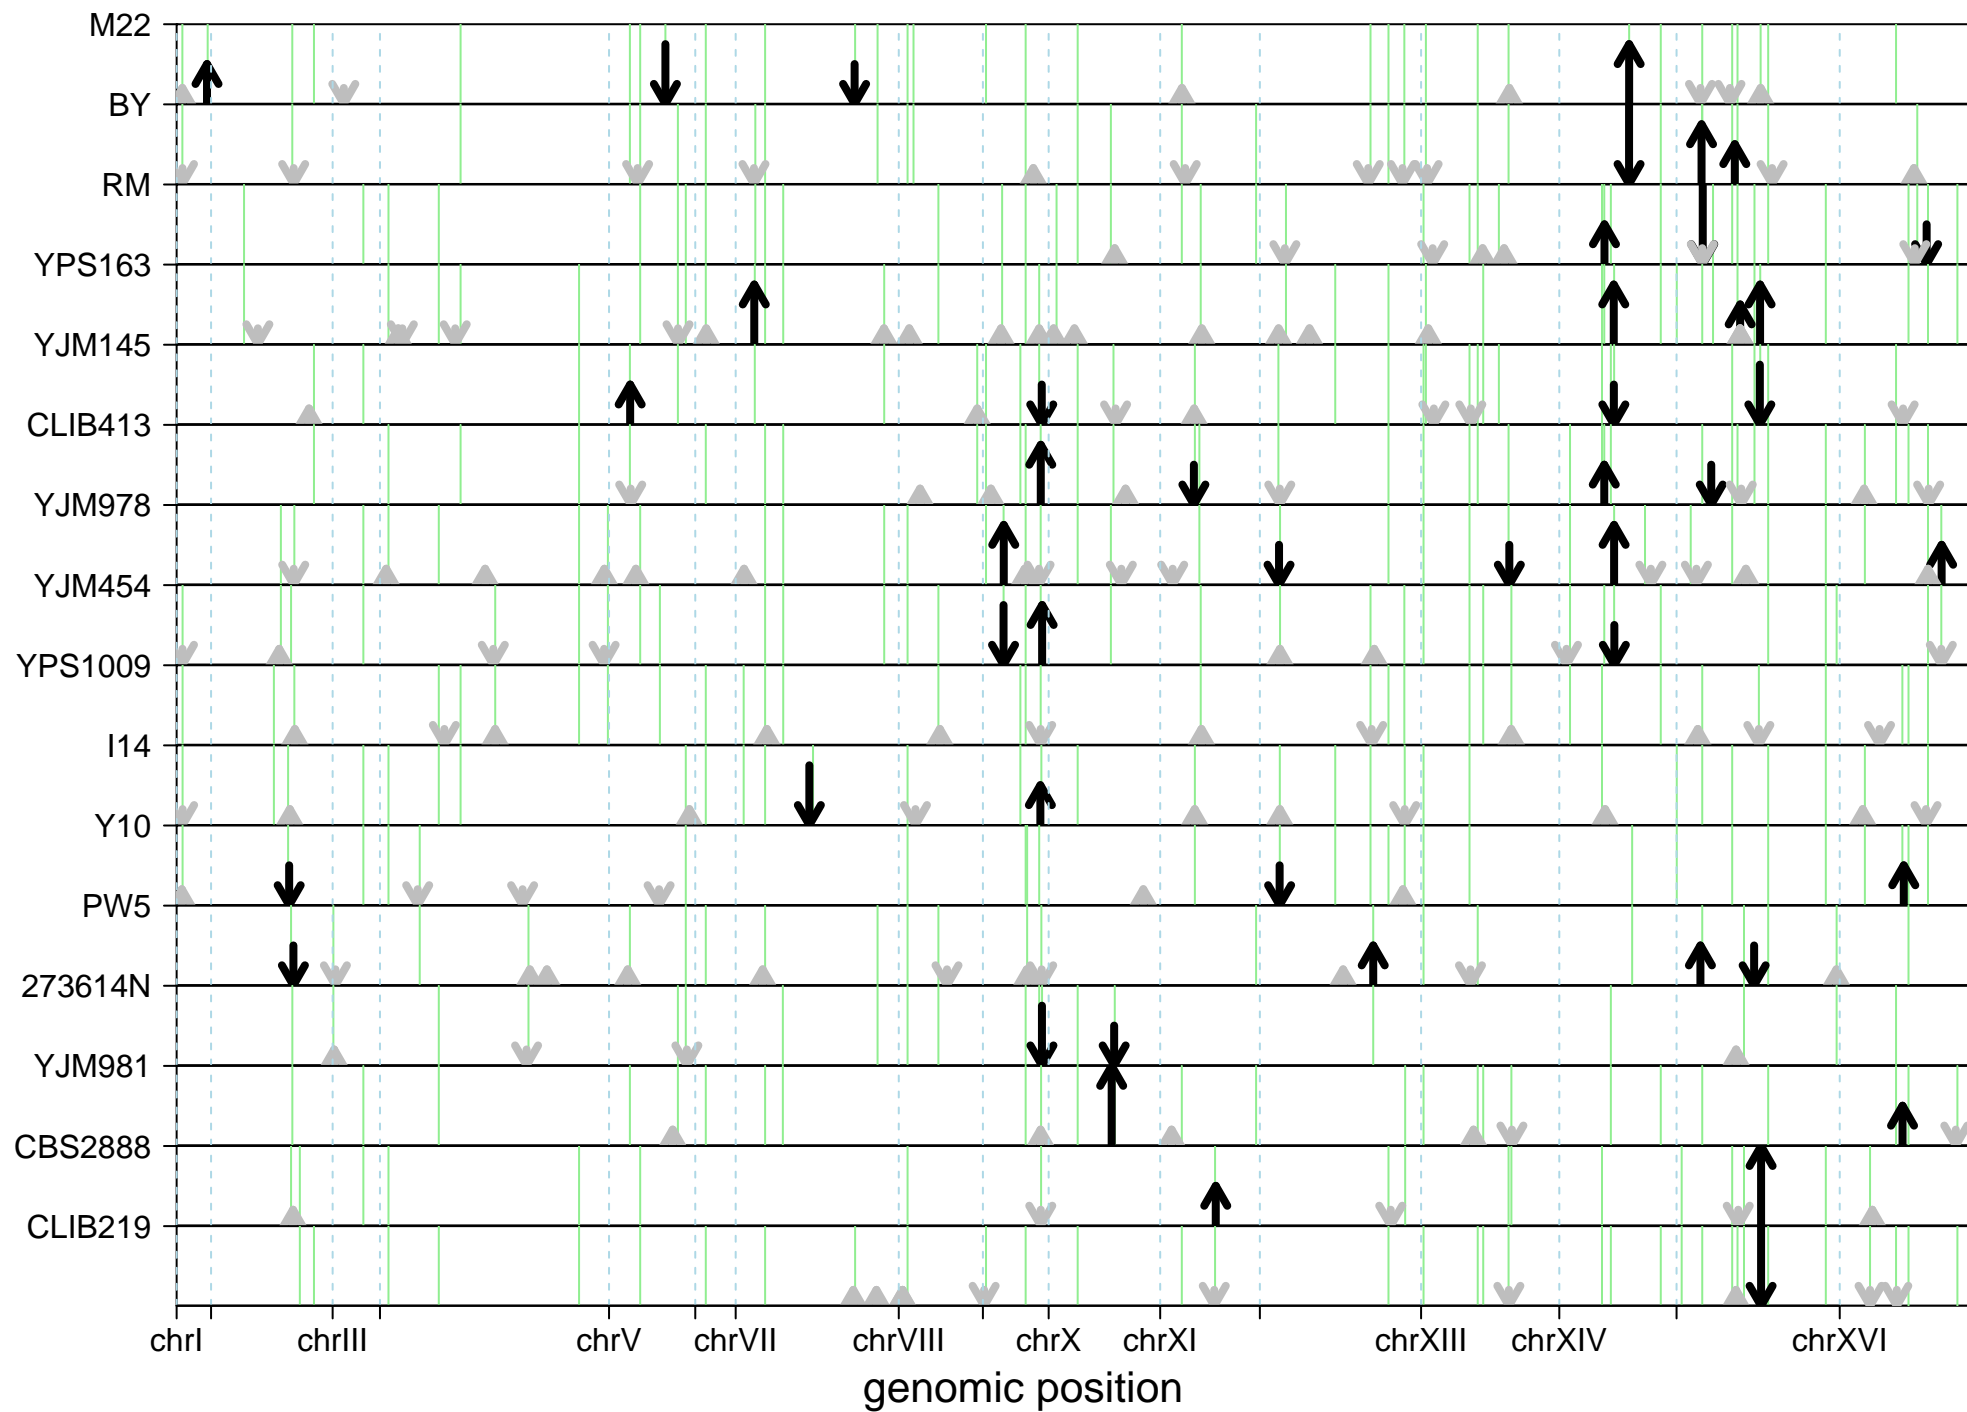

EtOH Glu 196 total QTL | 111 joint QTL

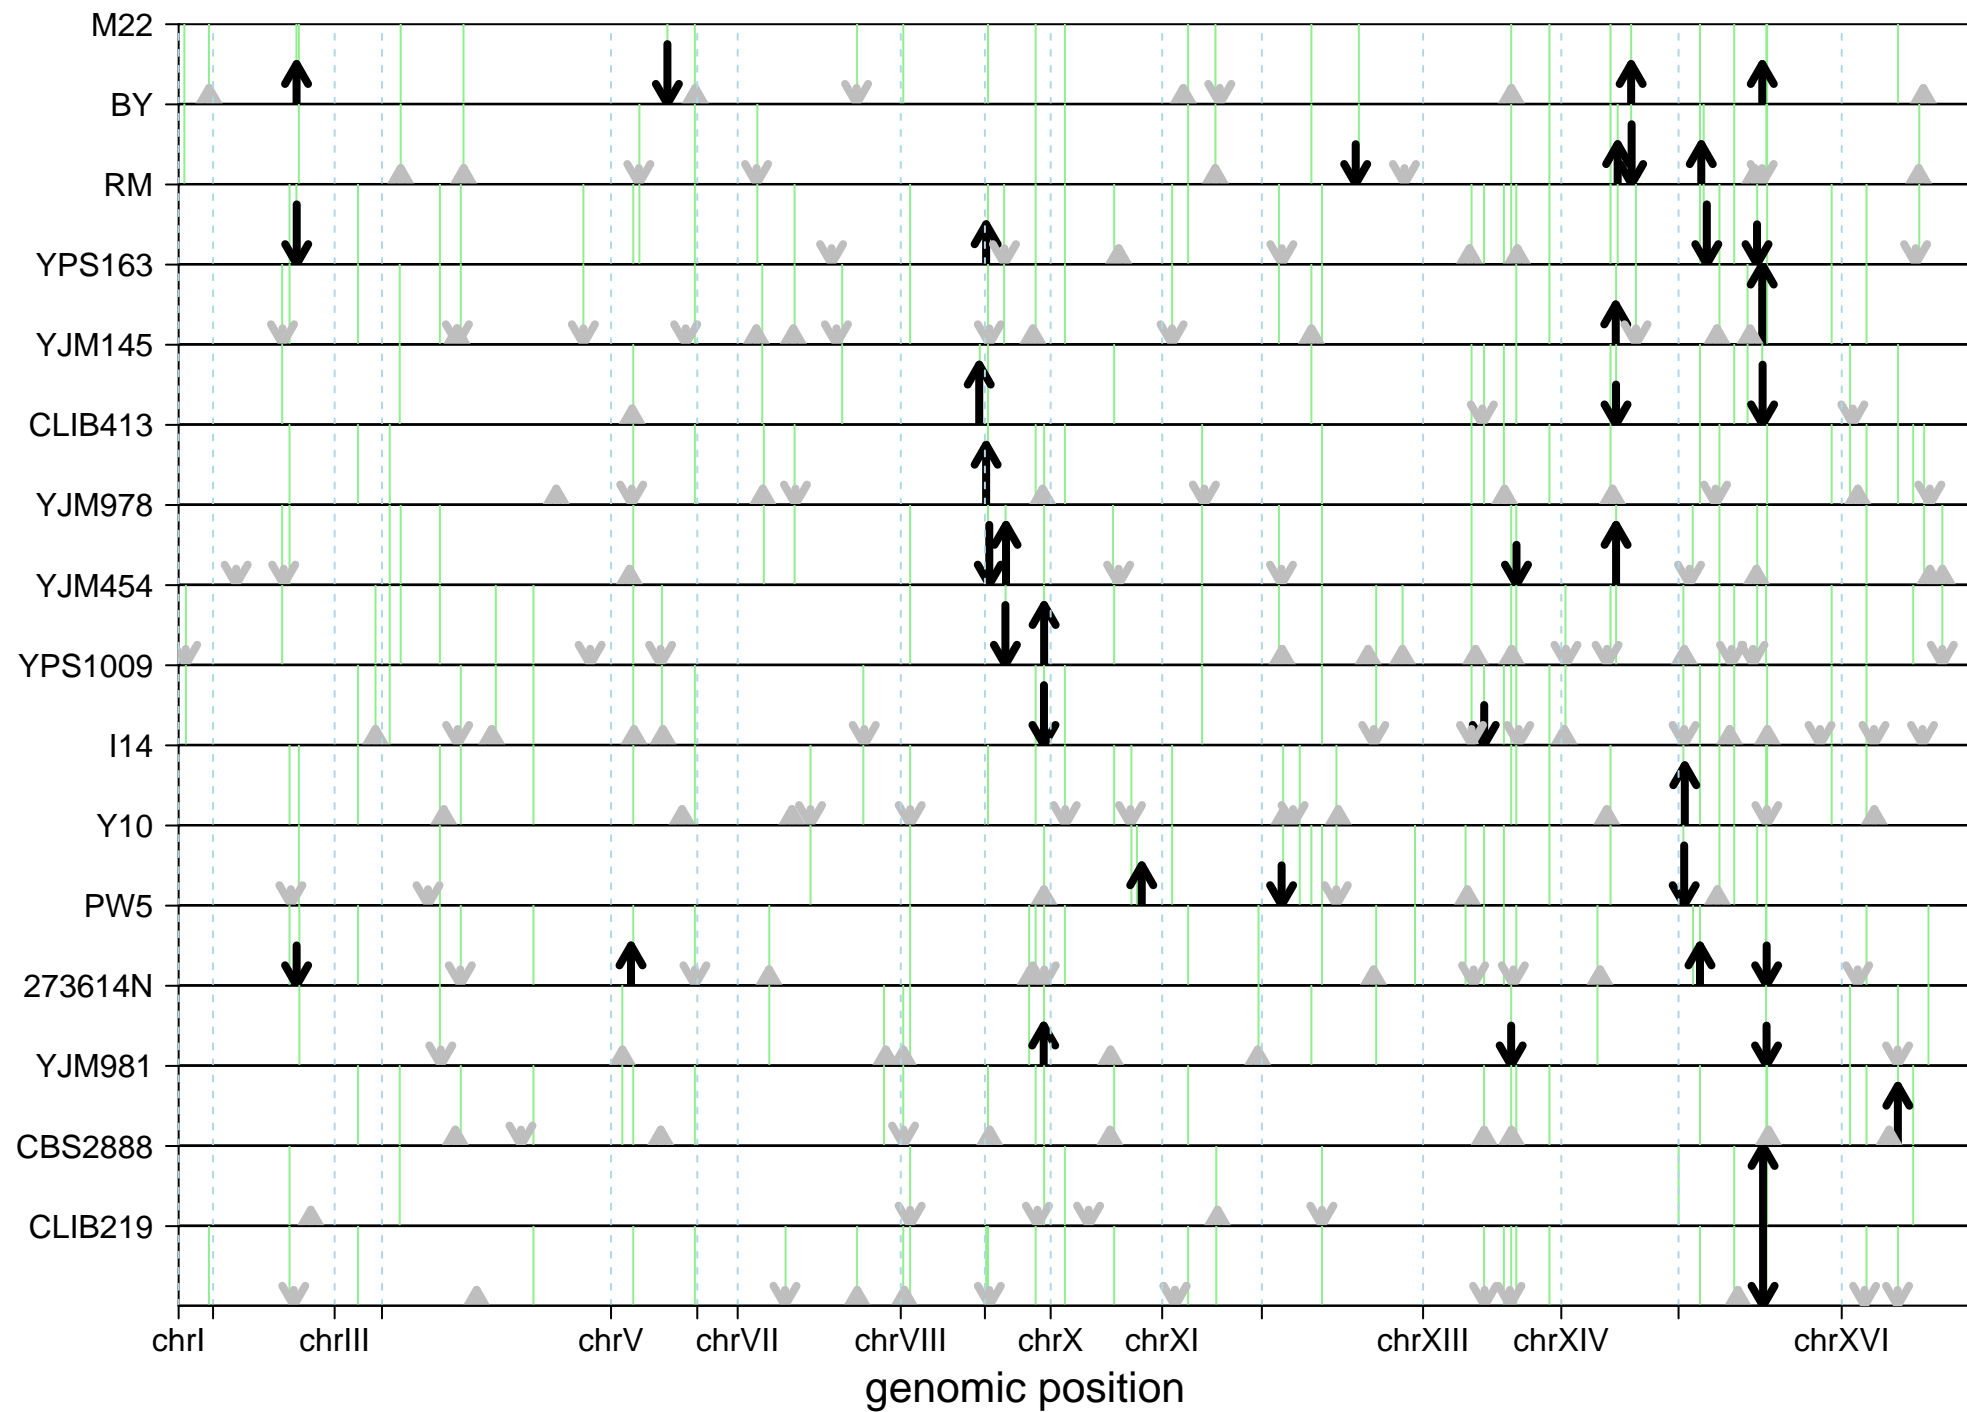

Fluconazole    215 total QTL    |    136 joint QTL

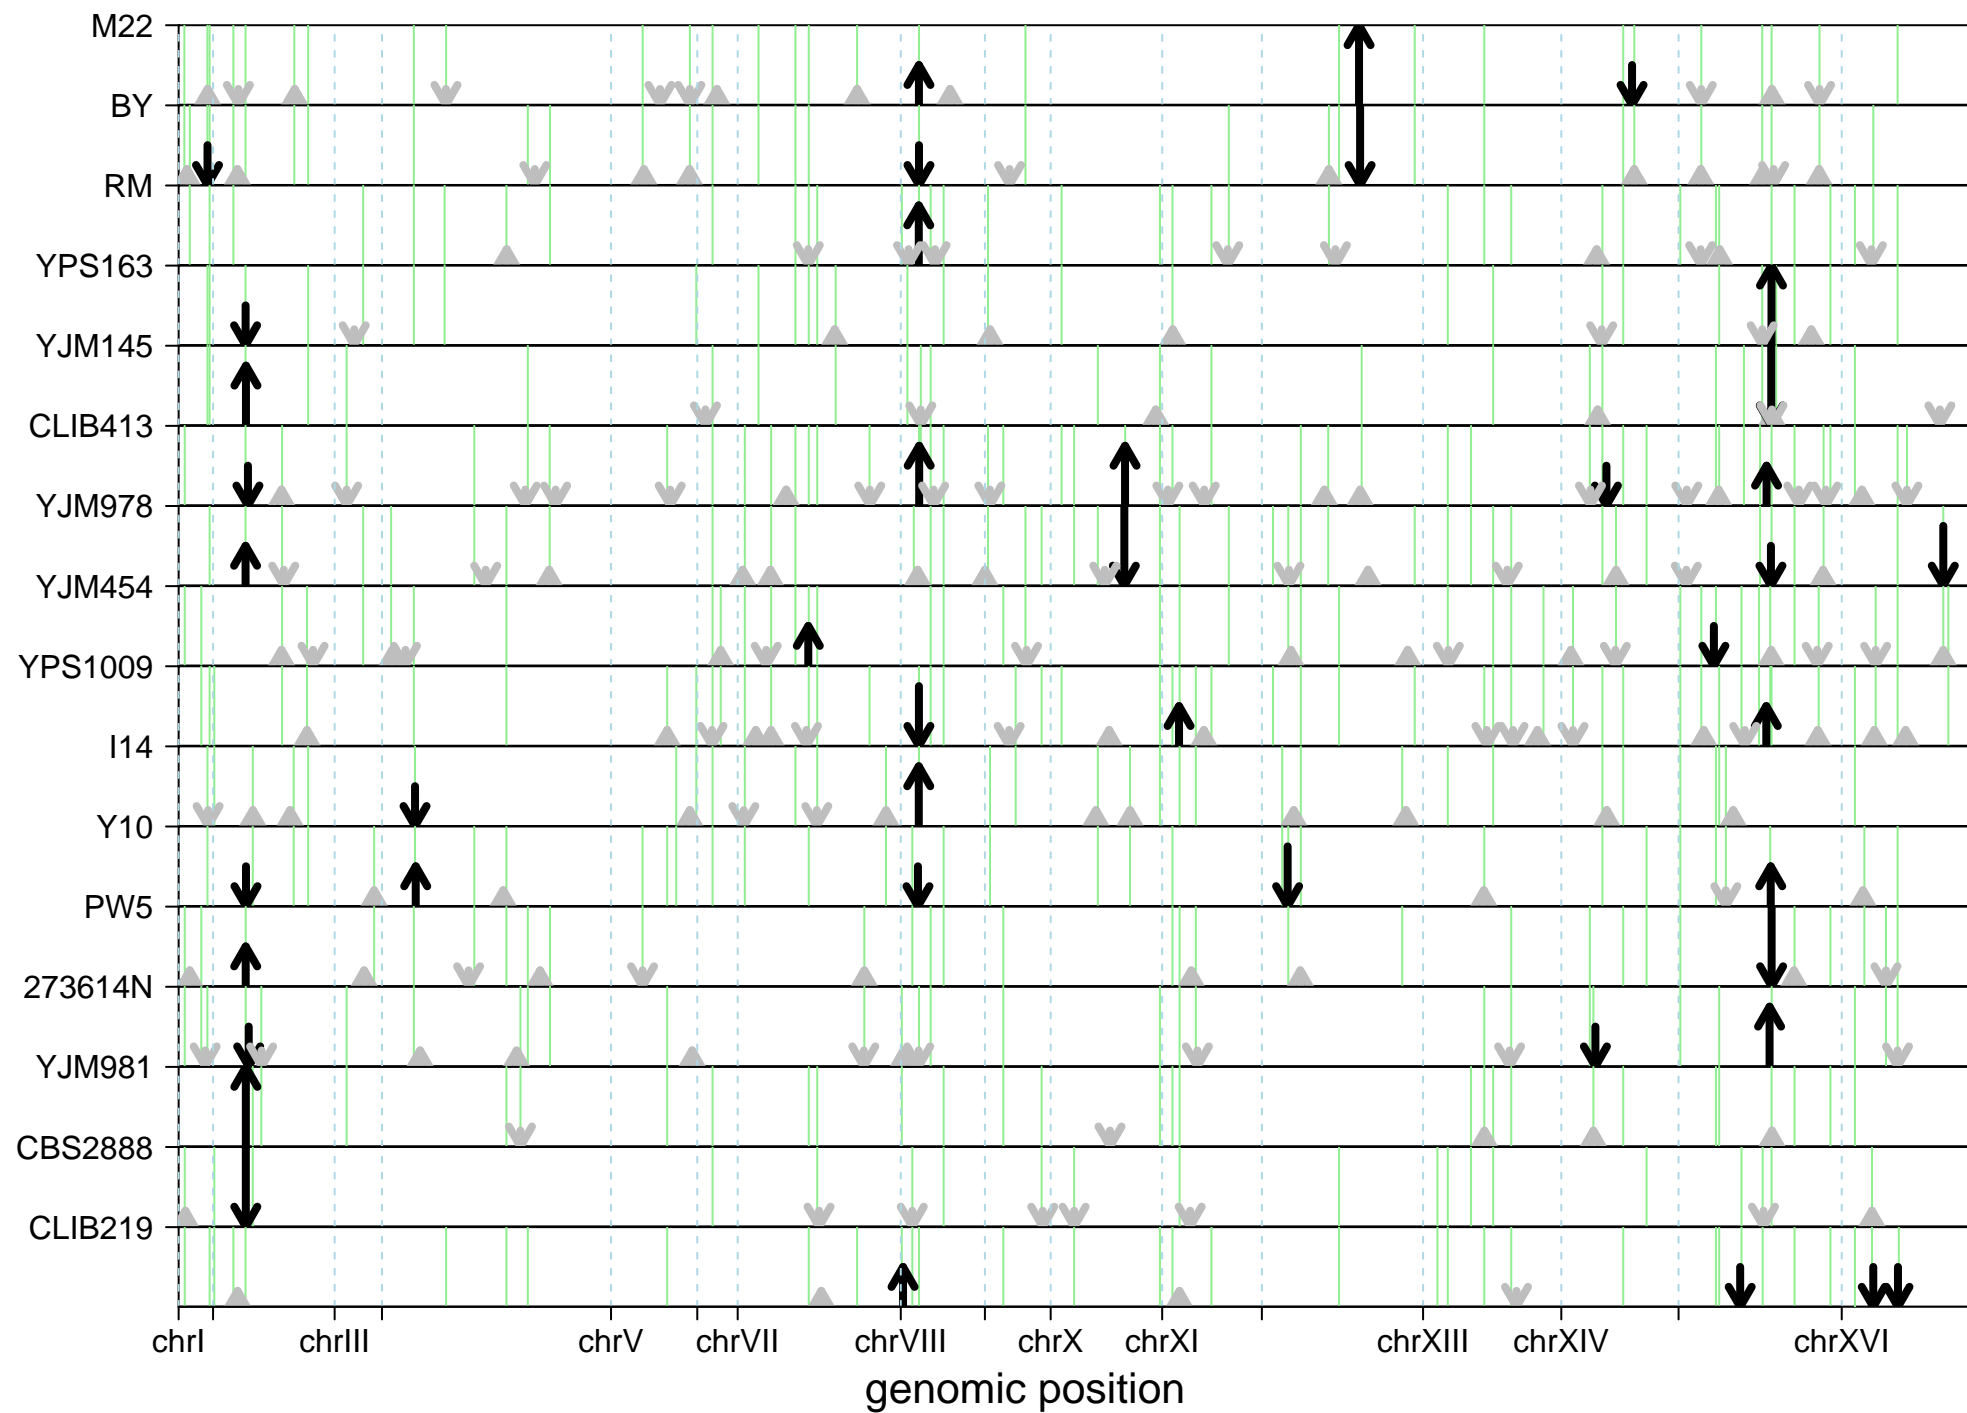

Formamide    151 total QTL    |    99 joint QTL

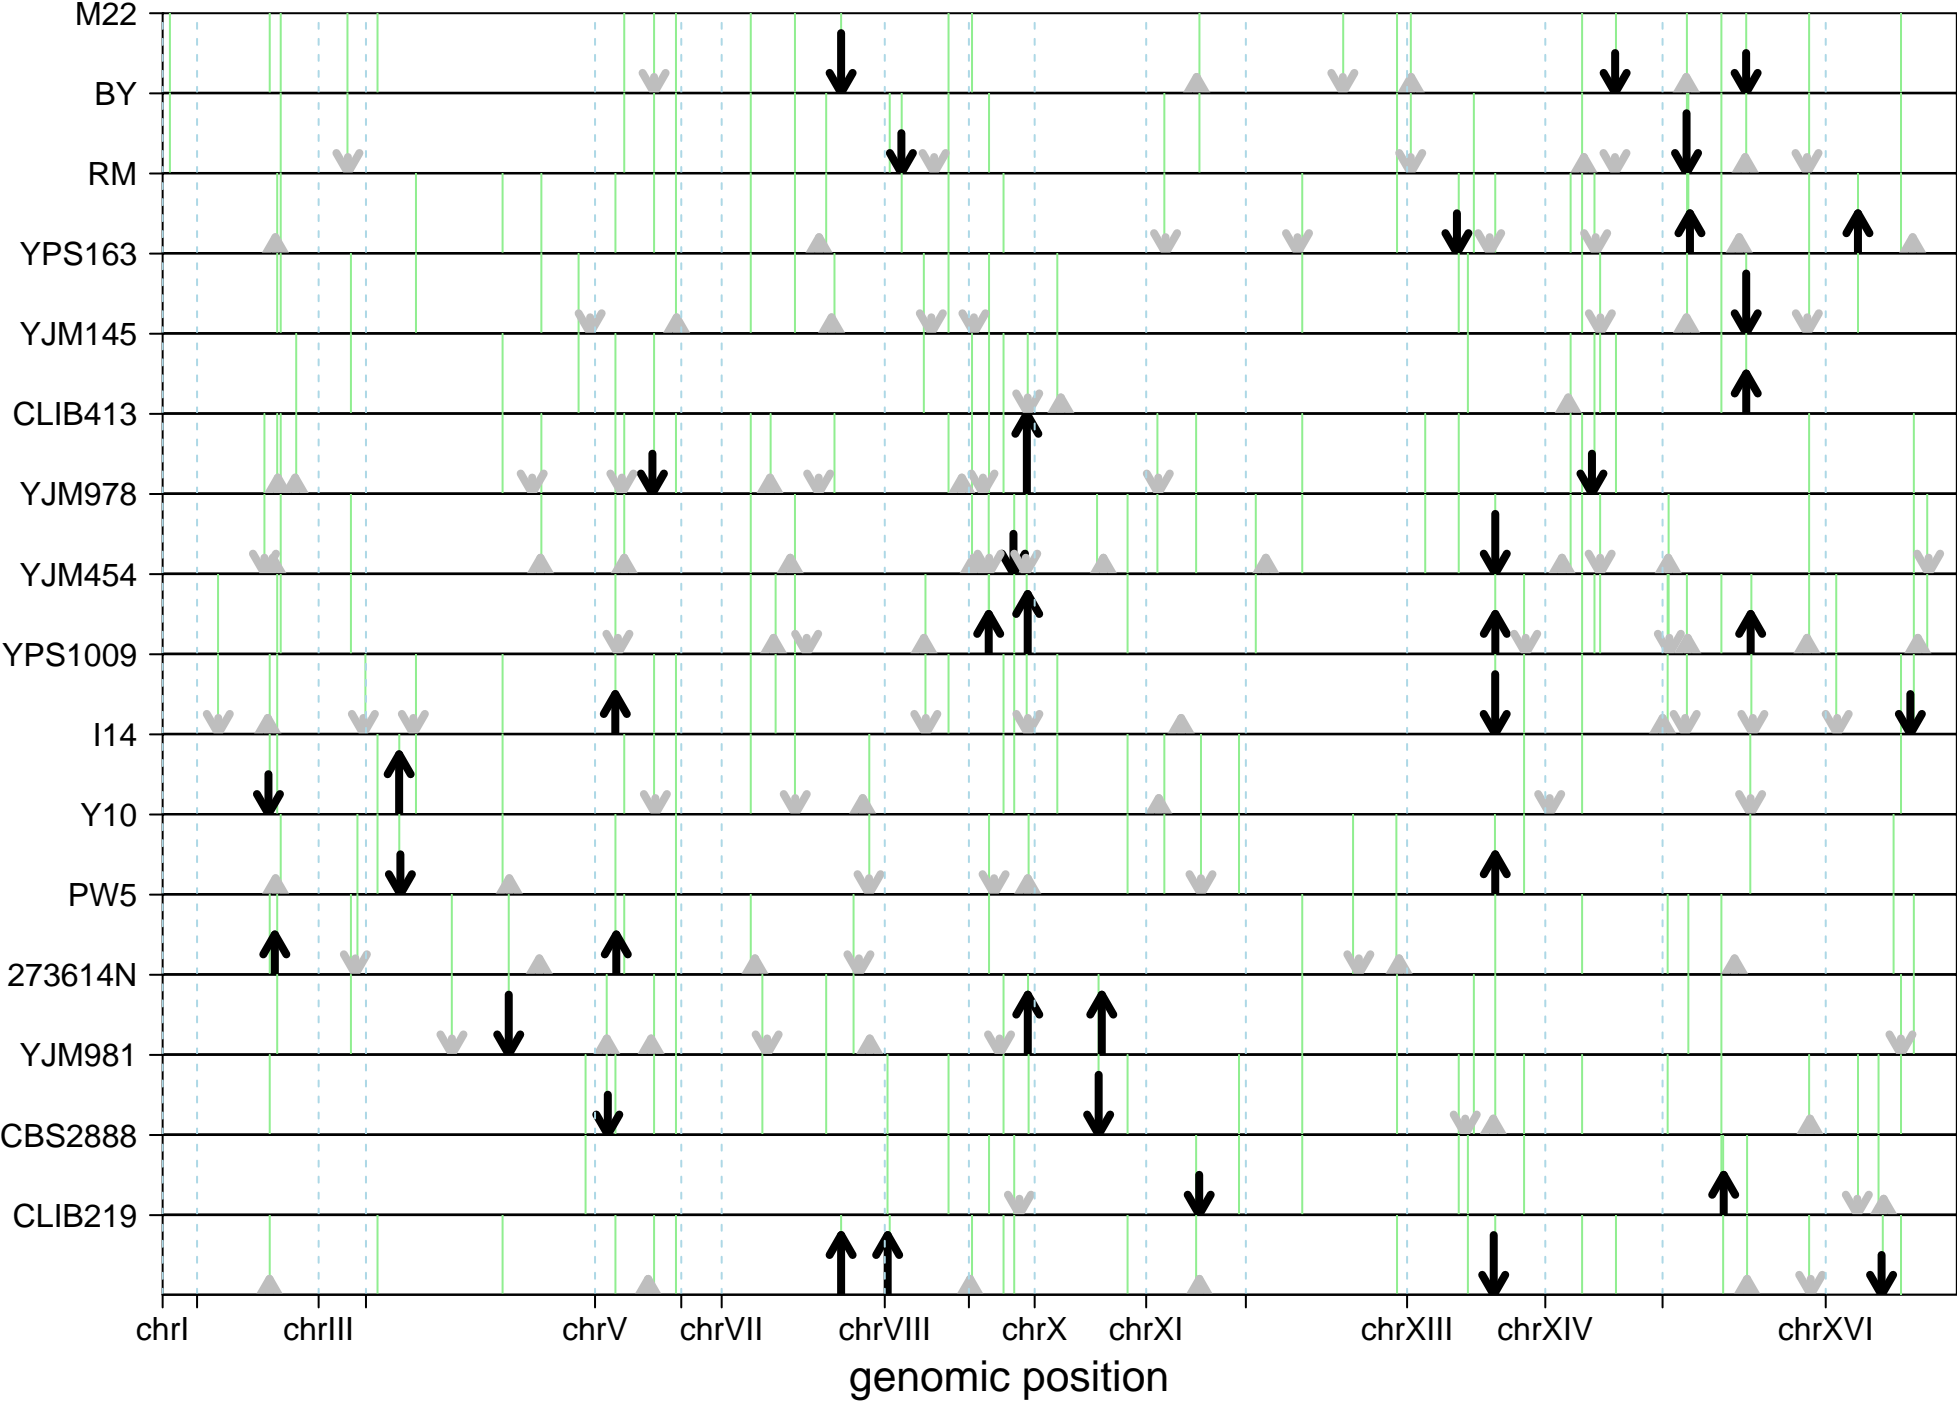

Fructose 222 total QTL | 118 joint QTL

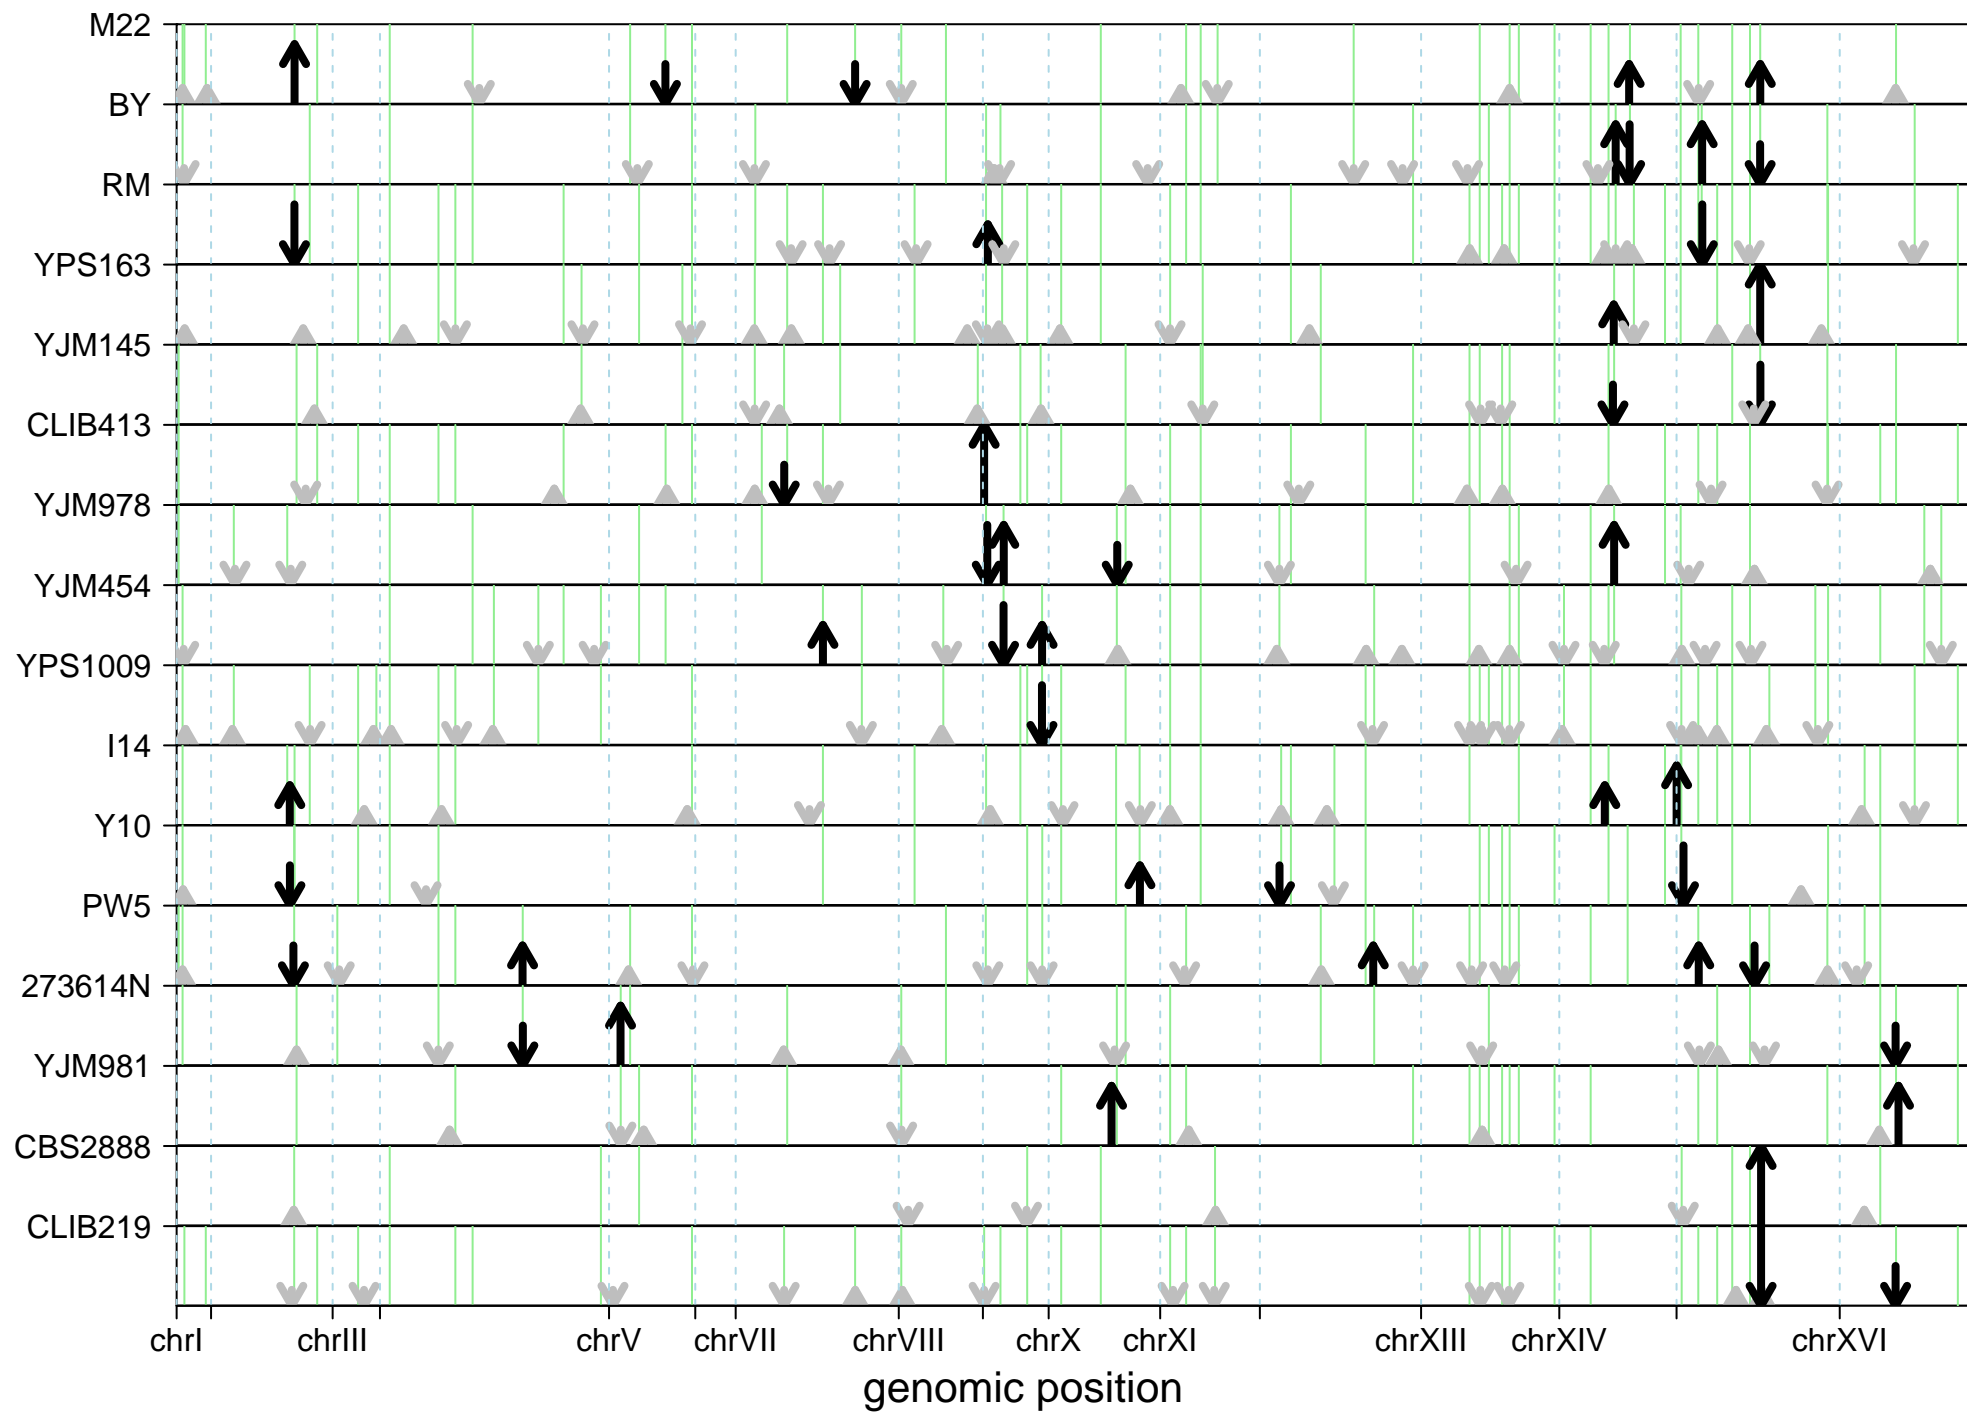

Galactose 159 total QTL | 106 joint QTL

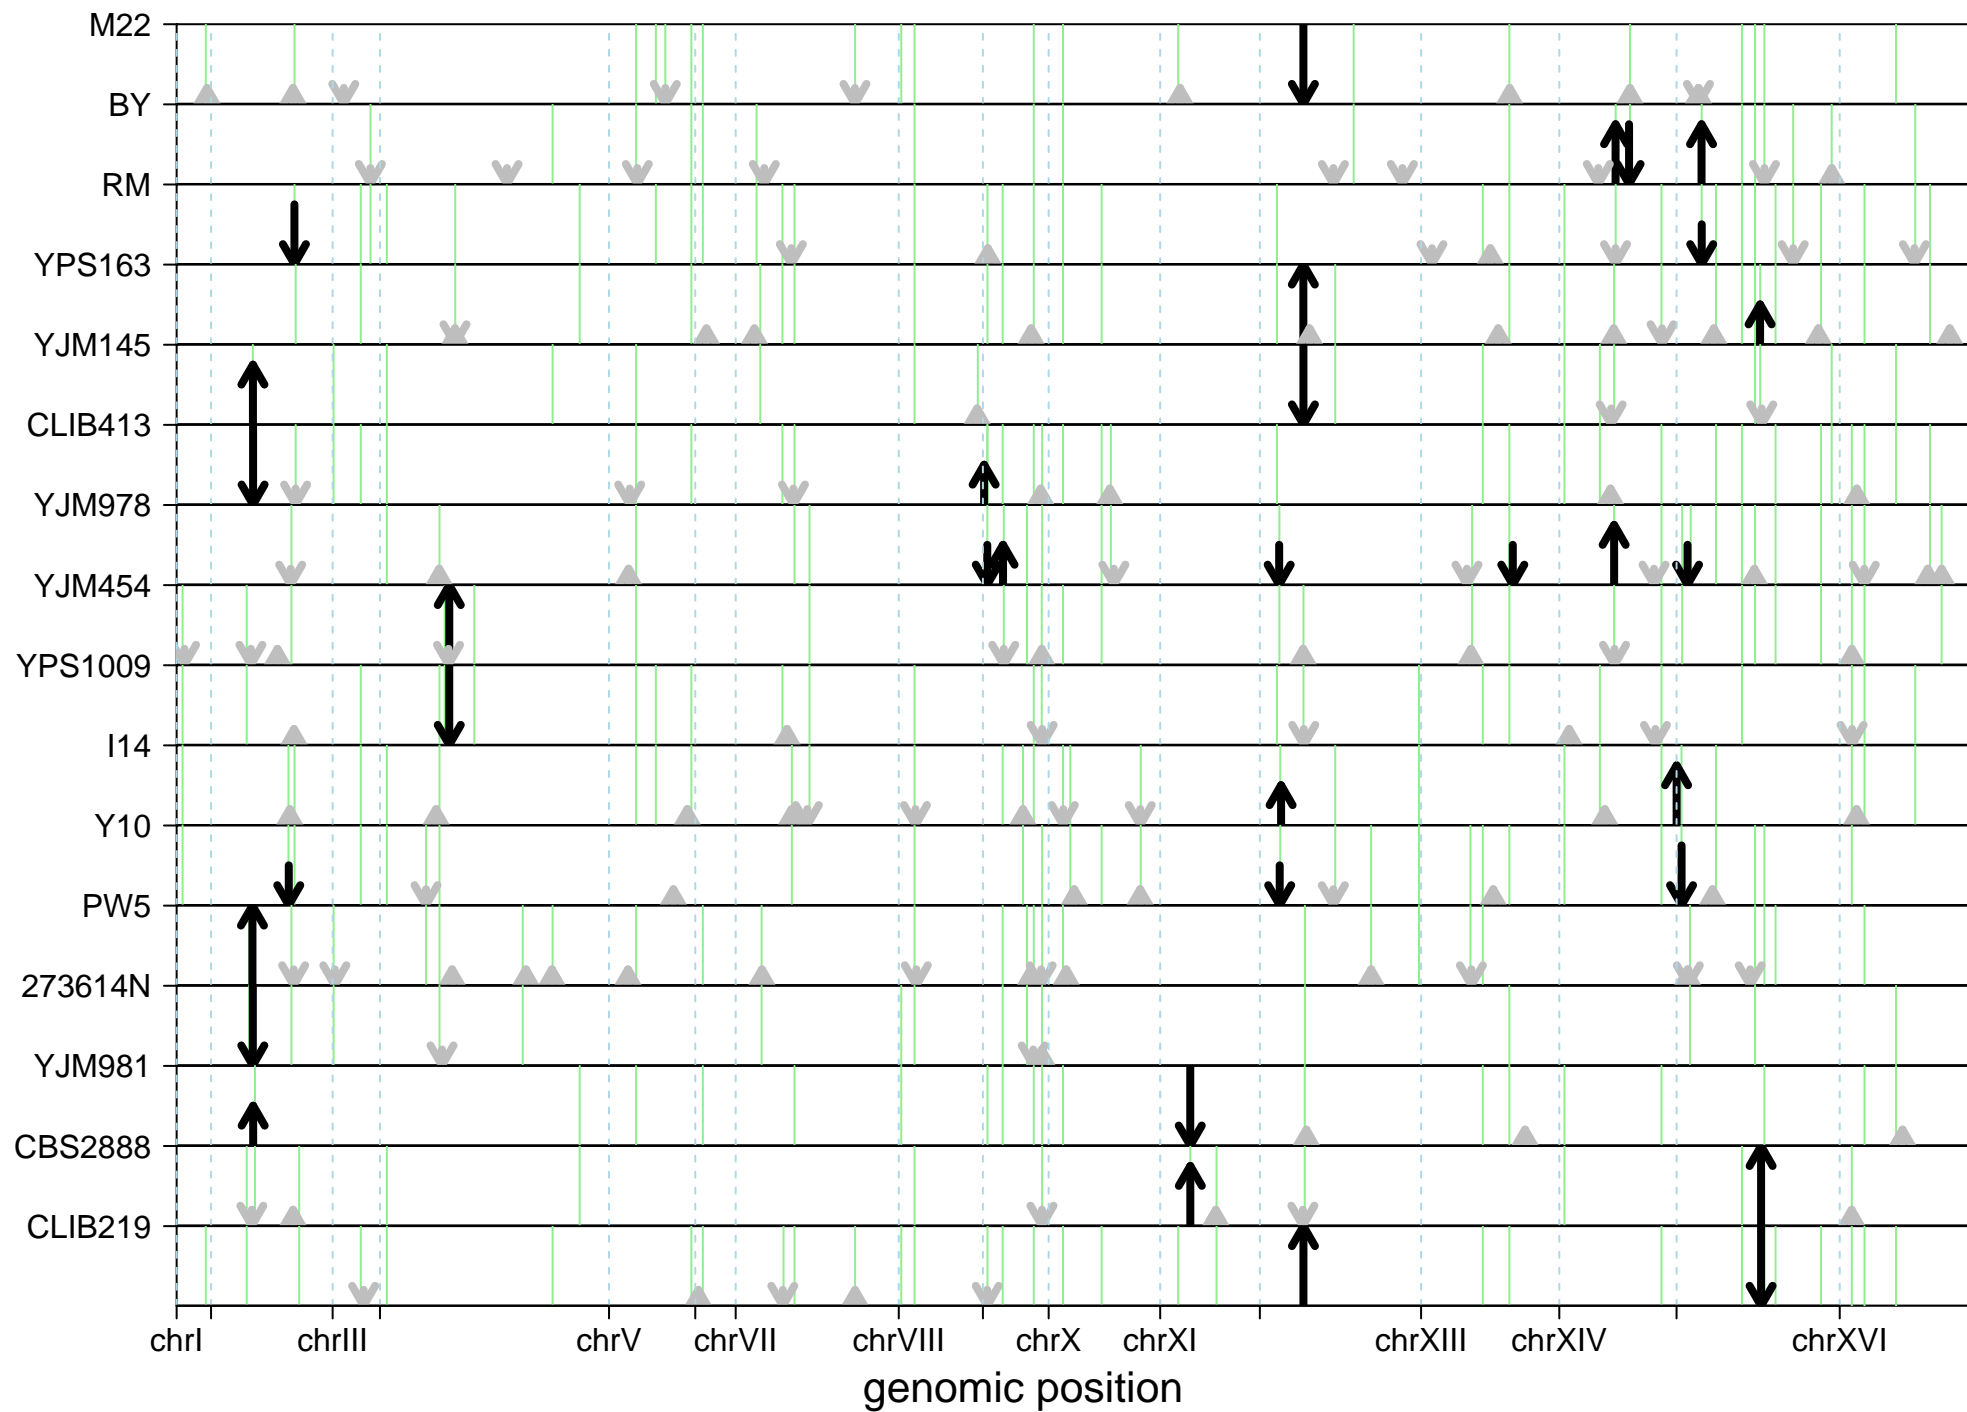

Glycerol 205 total QTL | 116 joint QTL

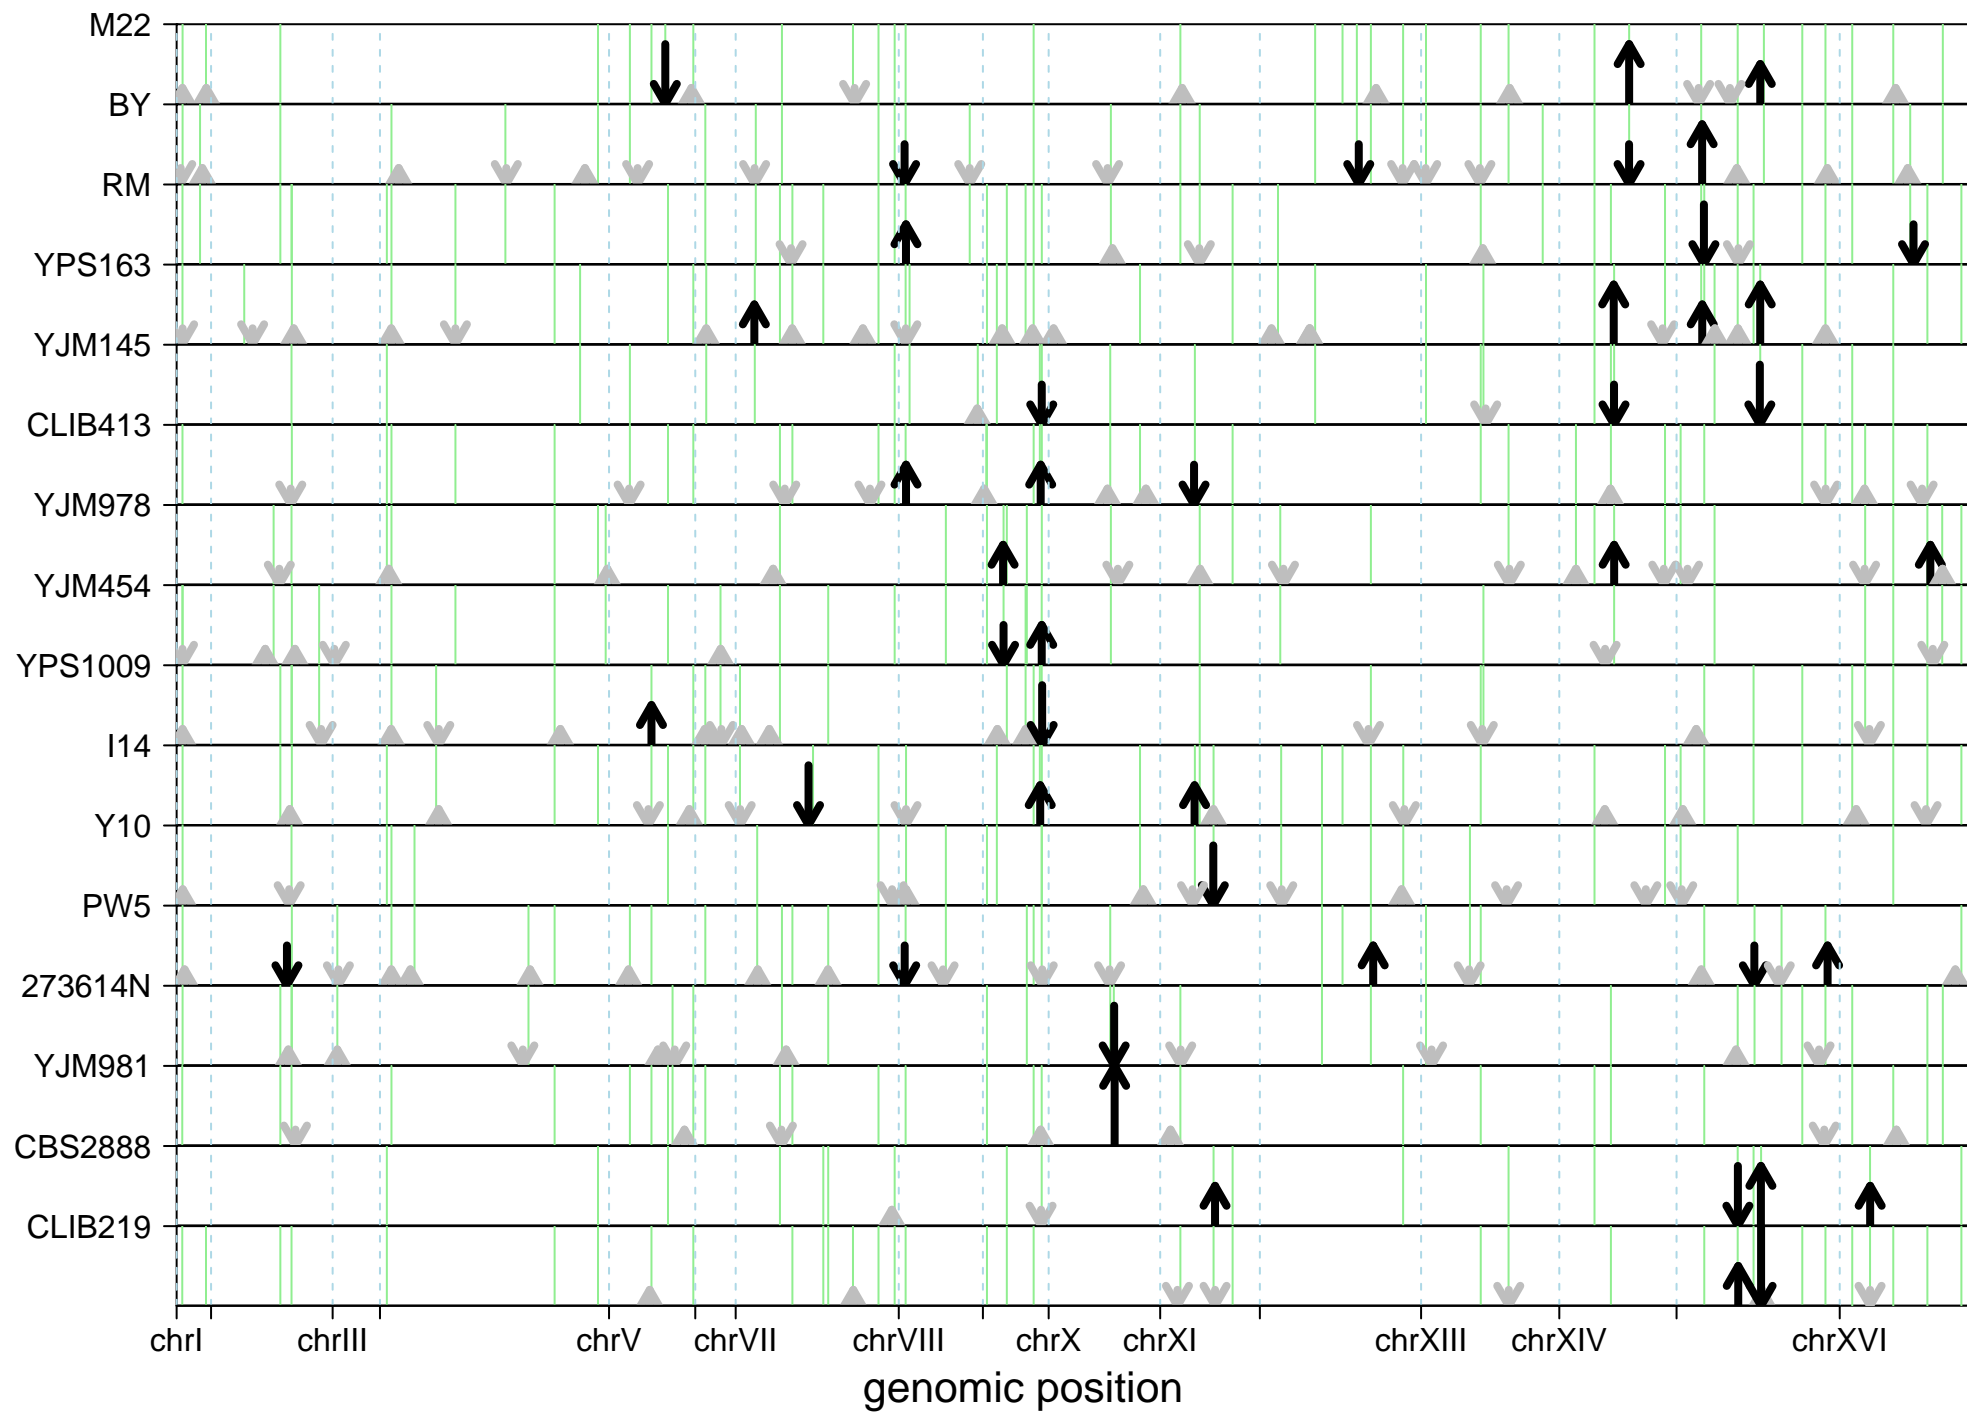

Lactate    220 total QTL    |    128 joint QTL

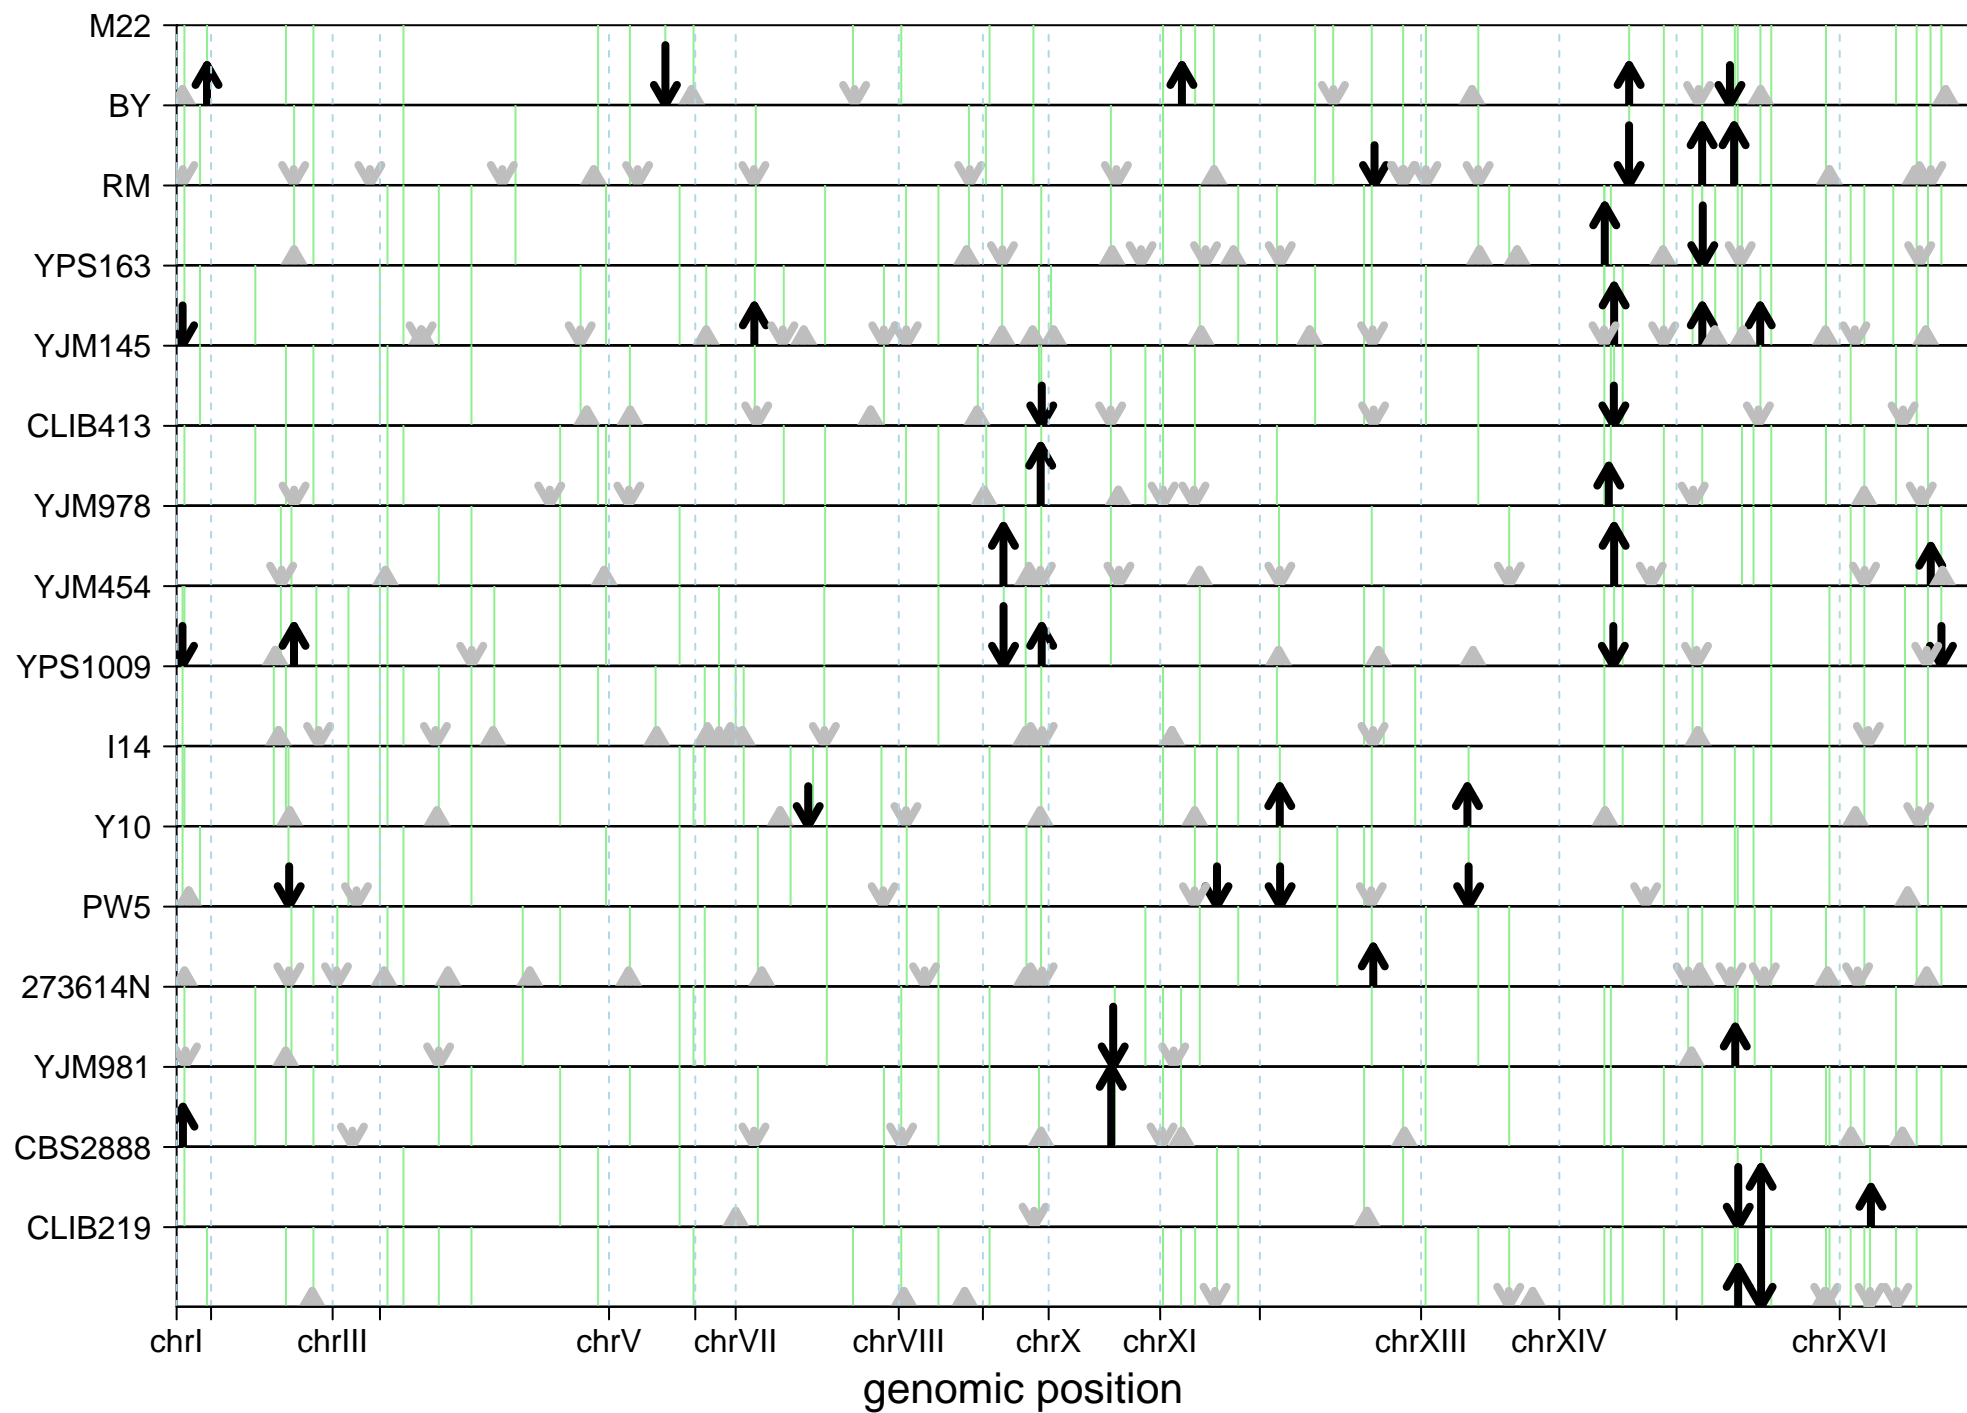



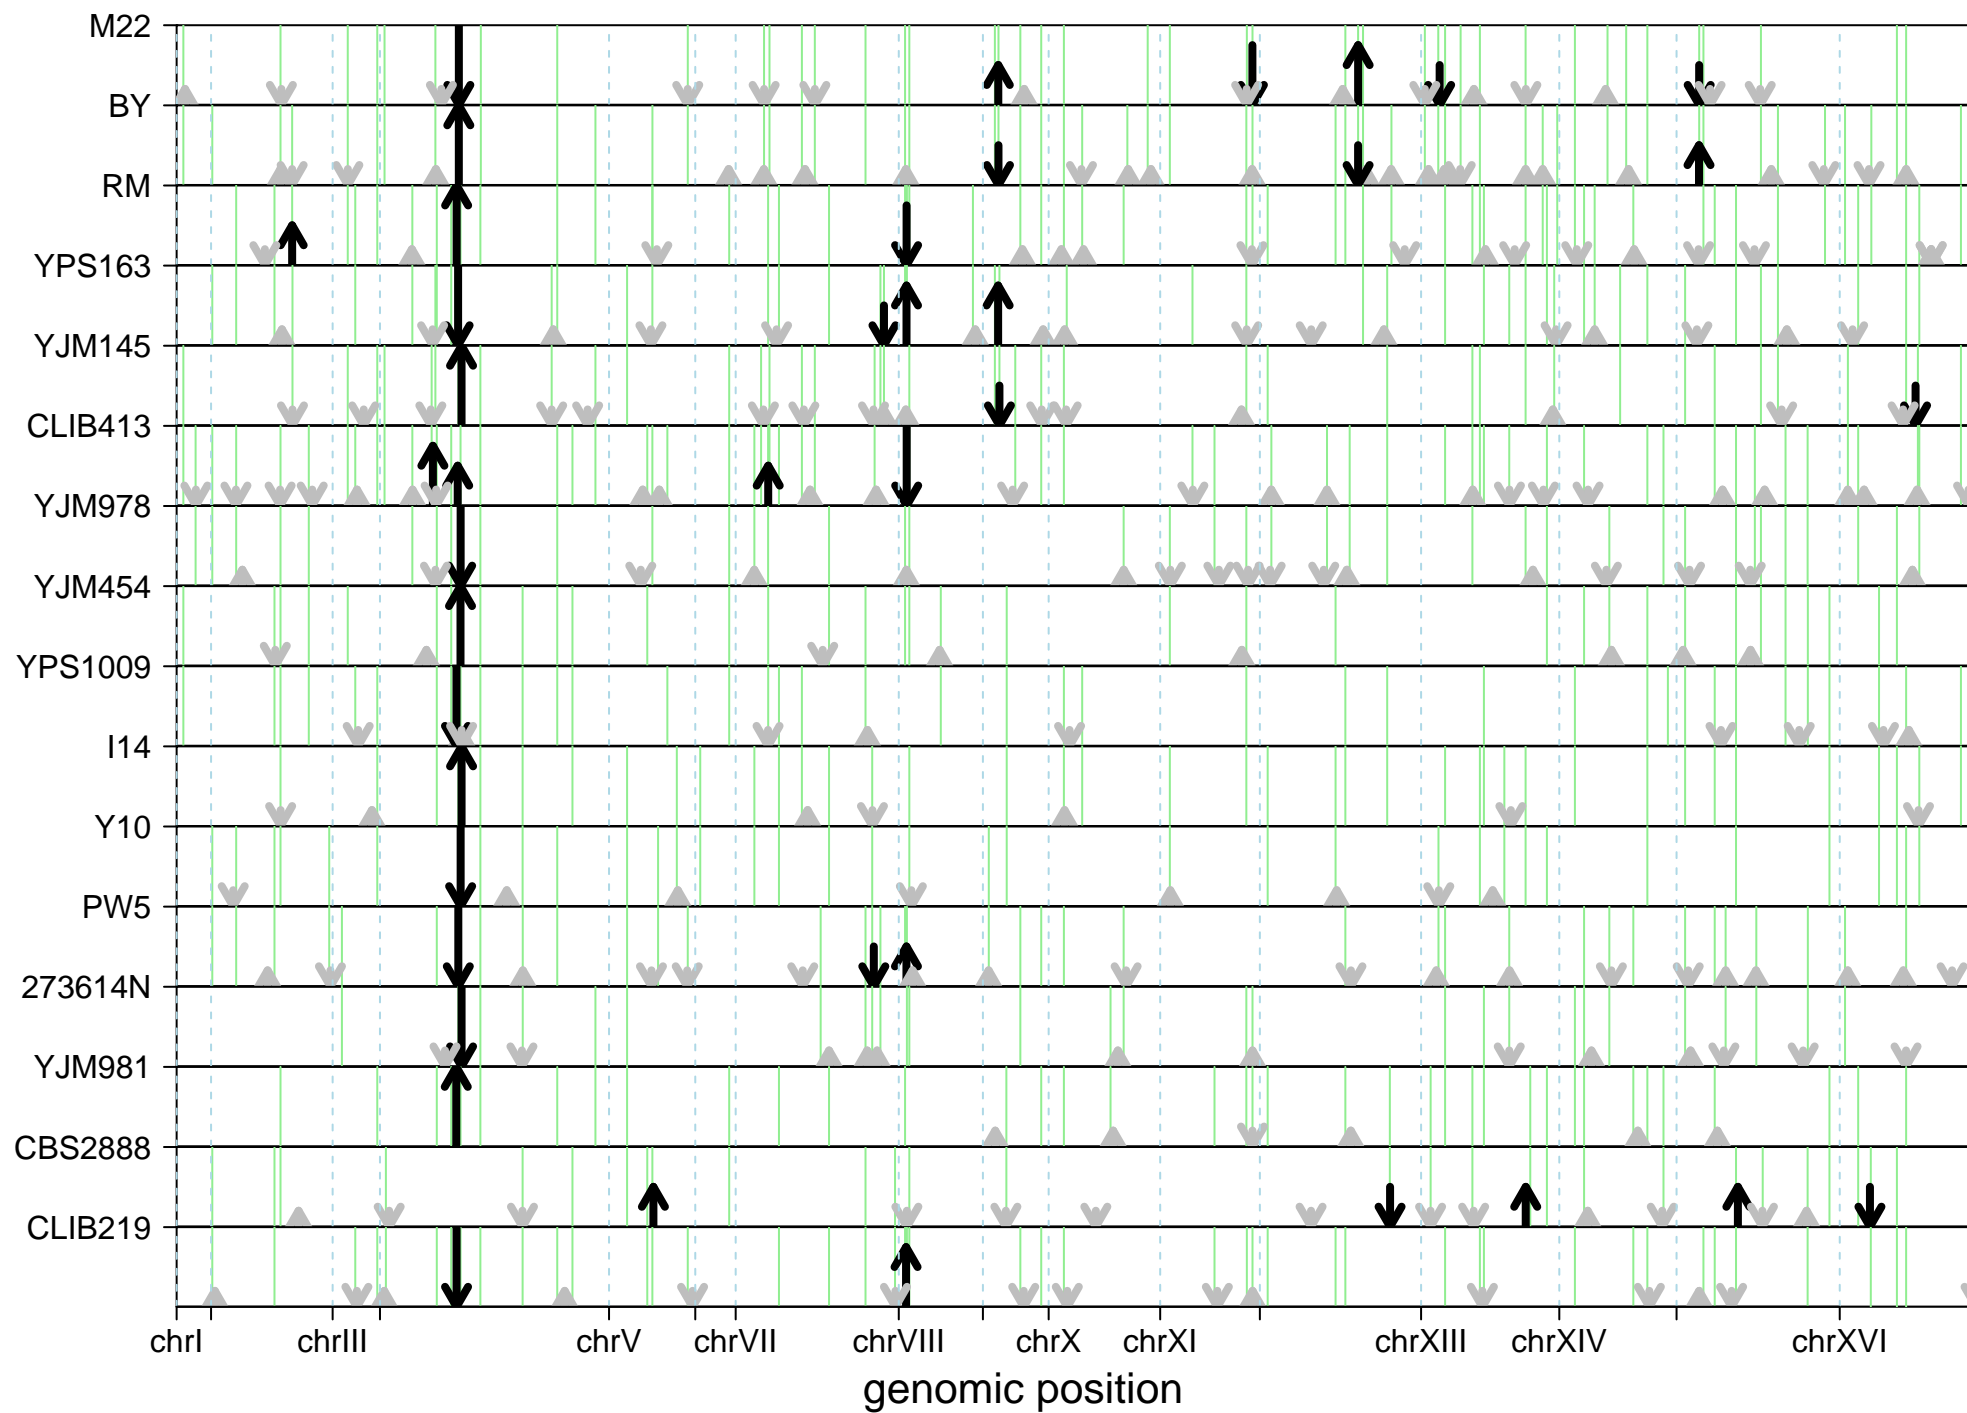

Magnesium Chloride 222 total QTL | 133 joint QTL

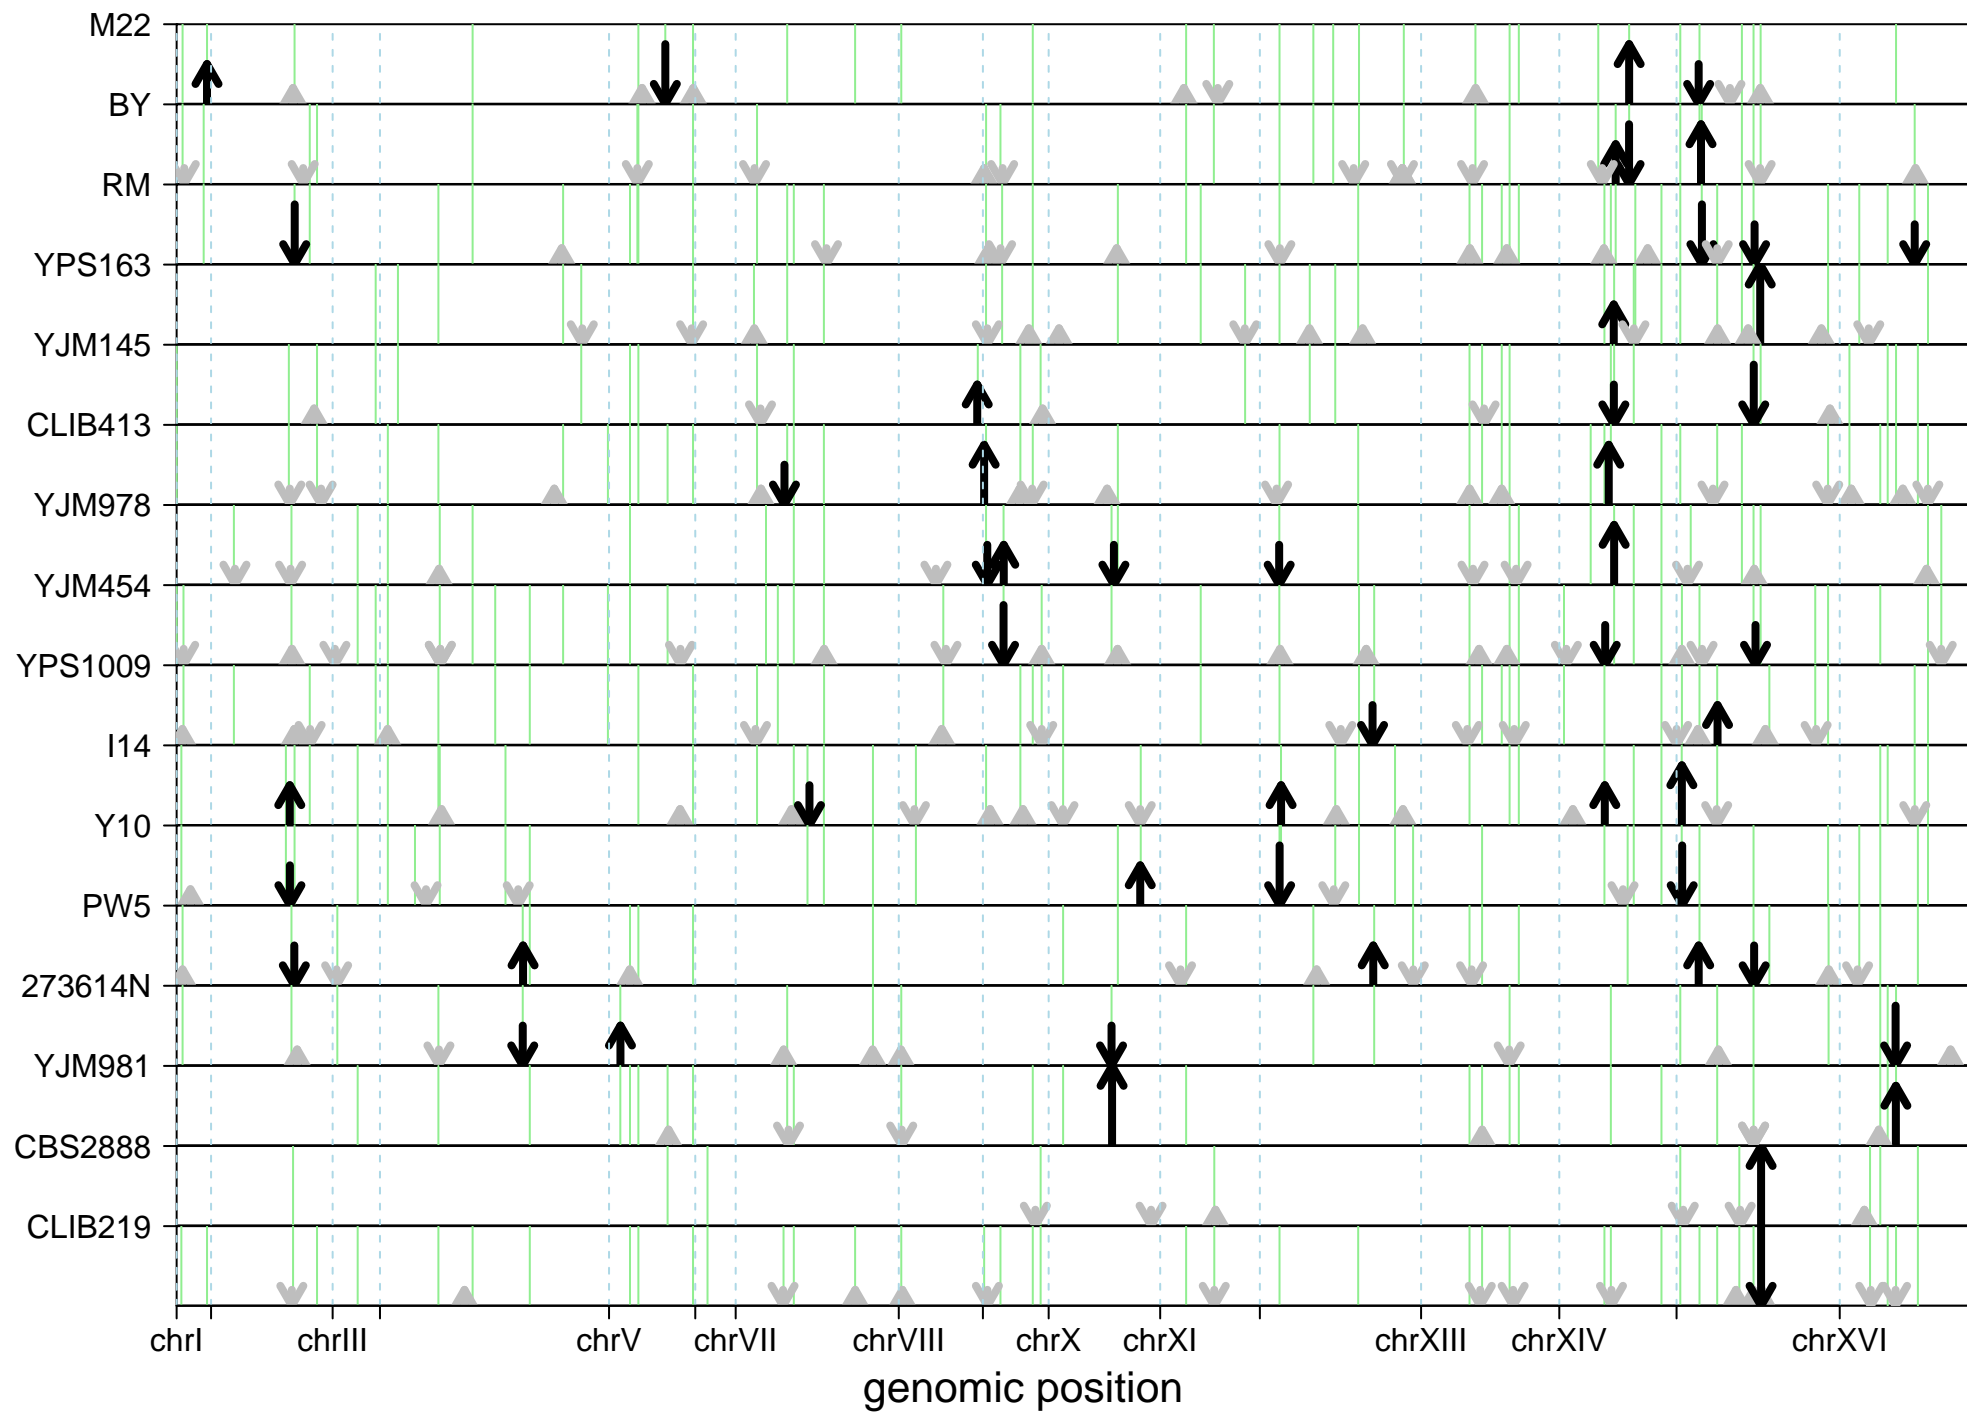

Maltose 157 total QTL | 96 joint QTL

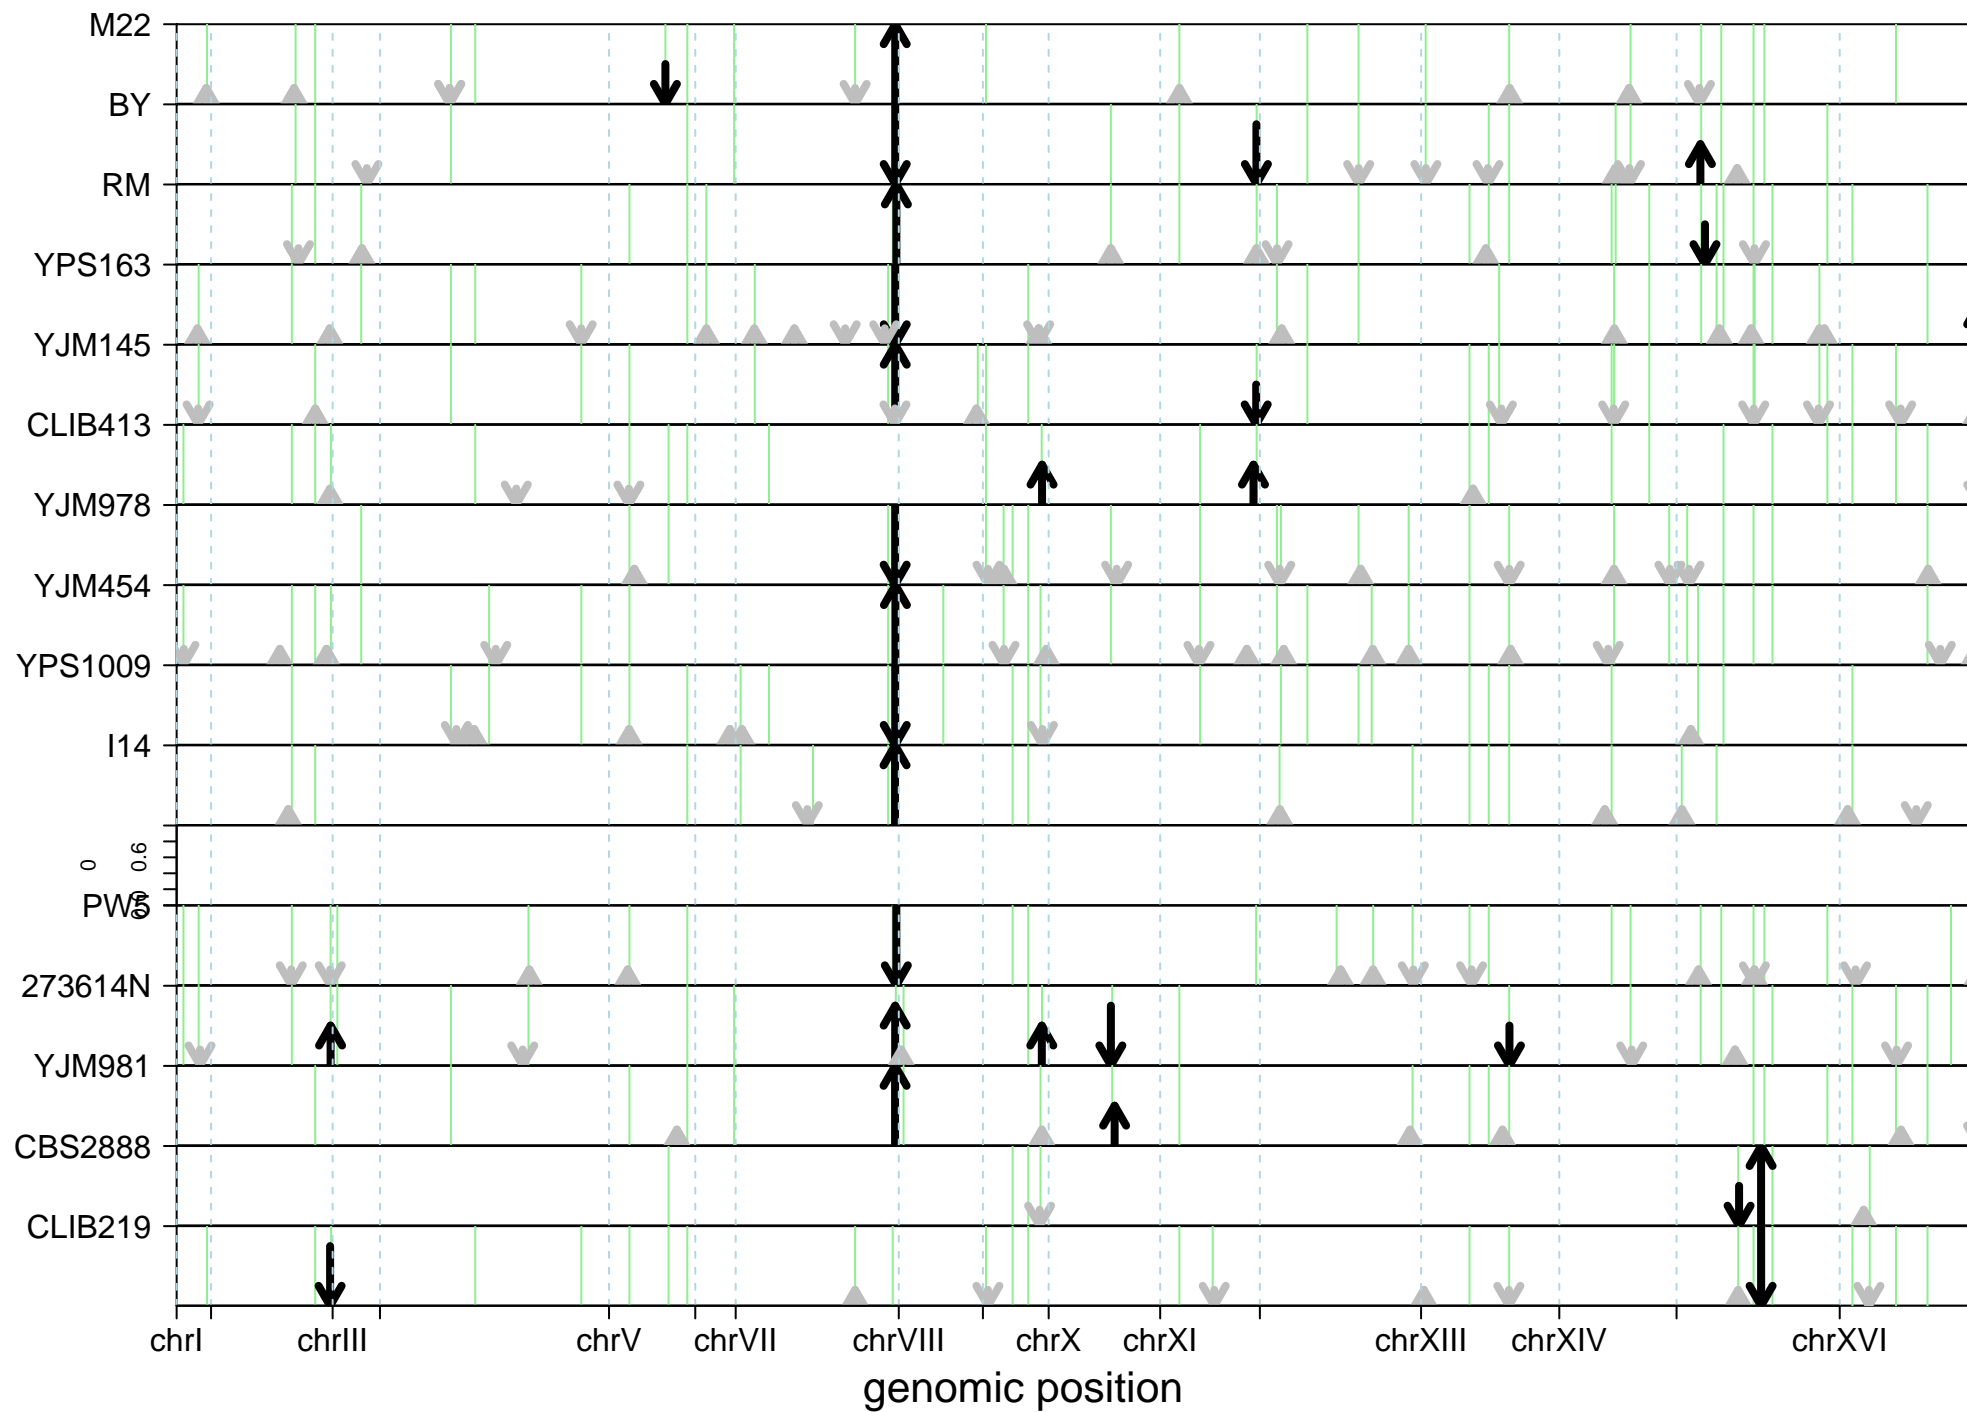

Manganese Sulfate 349 total QTL | 174 joint QTL

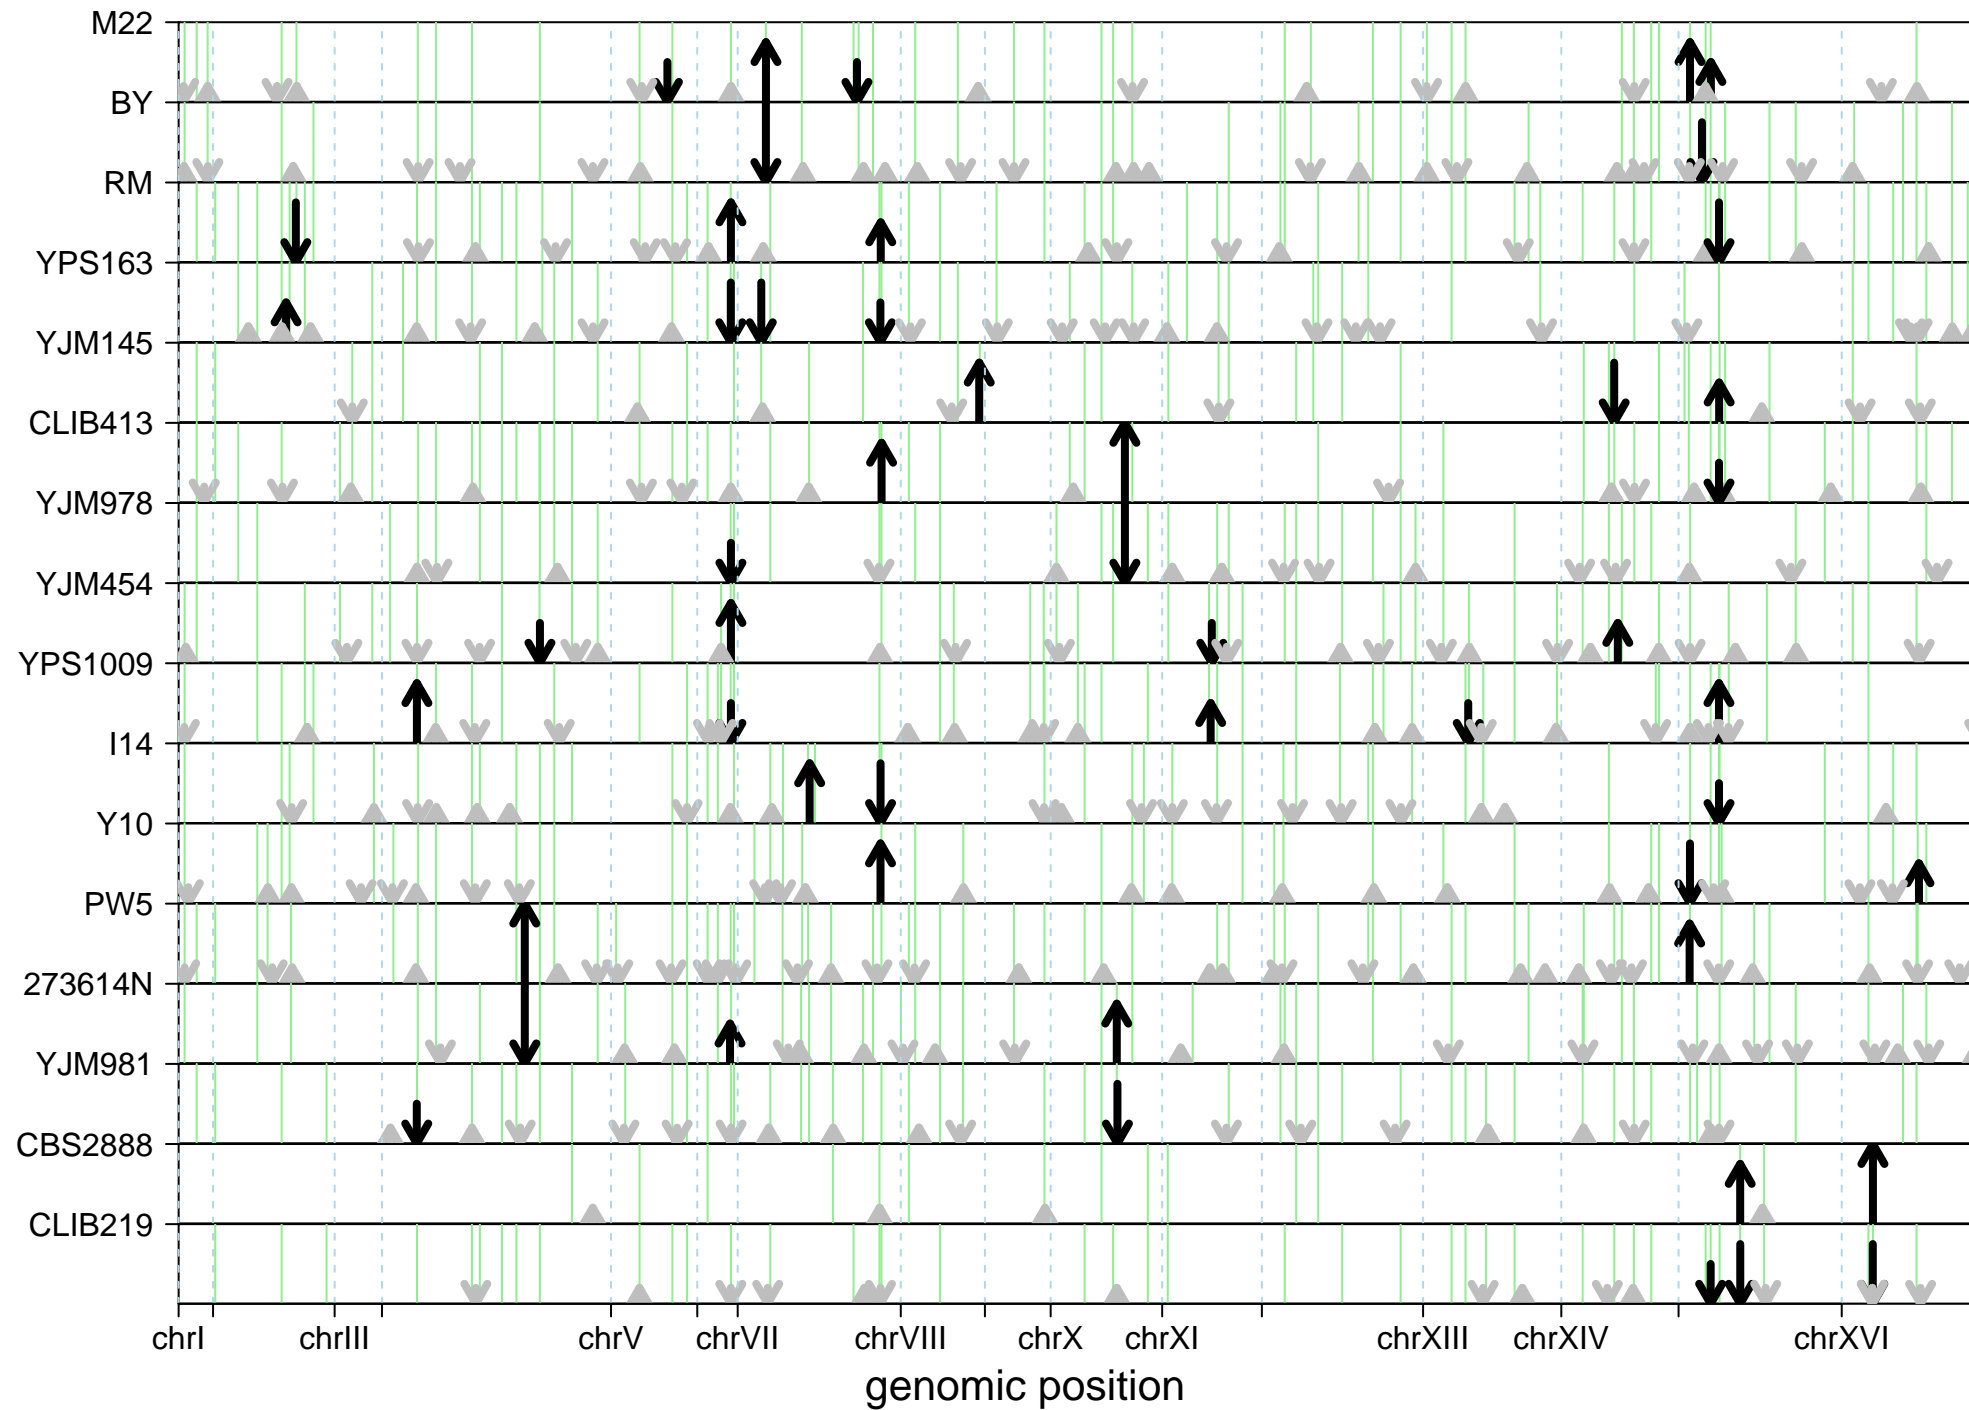

Mannose 211 total QTL | 114 joint QTL

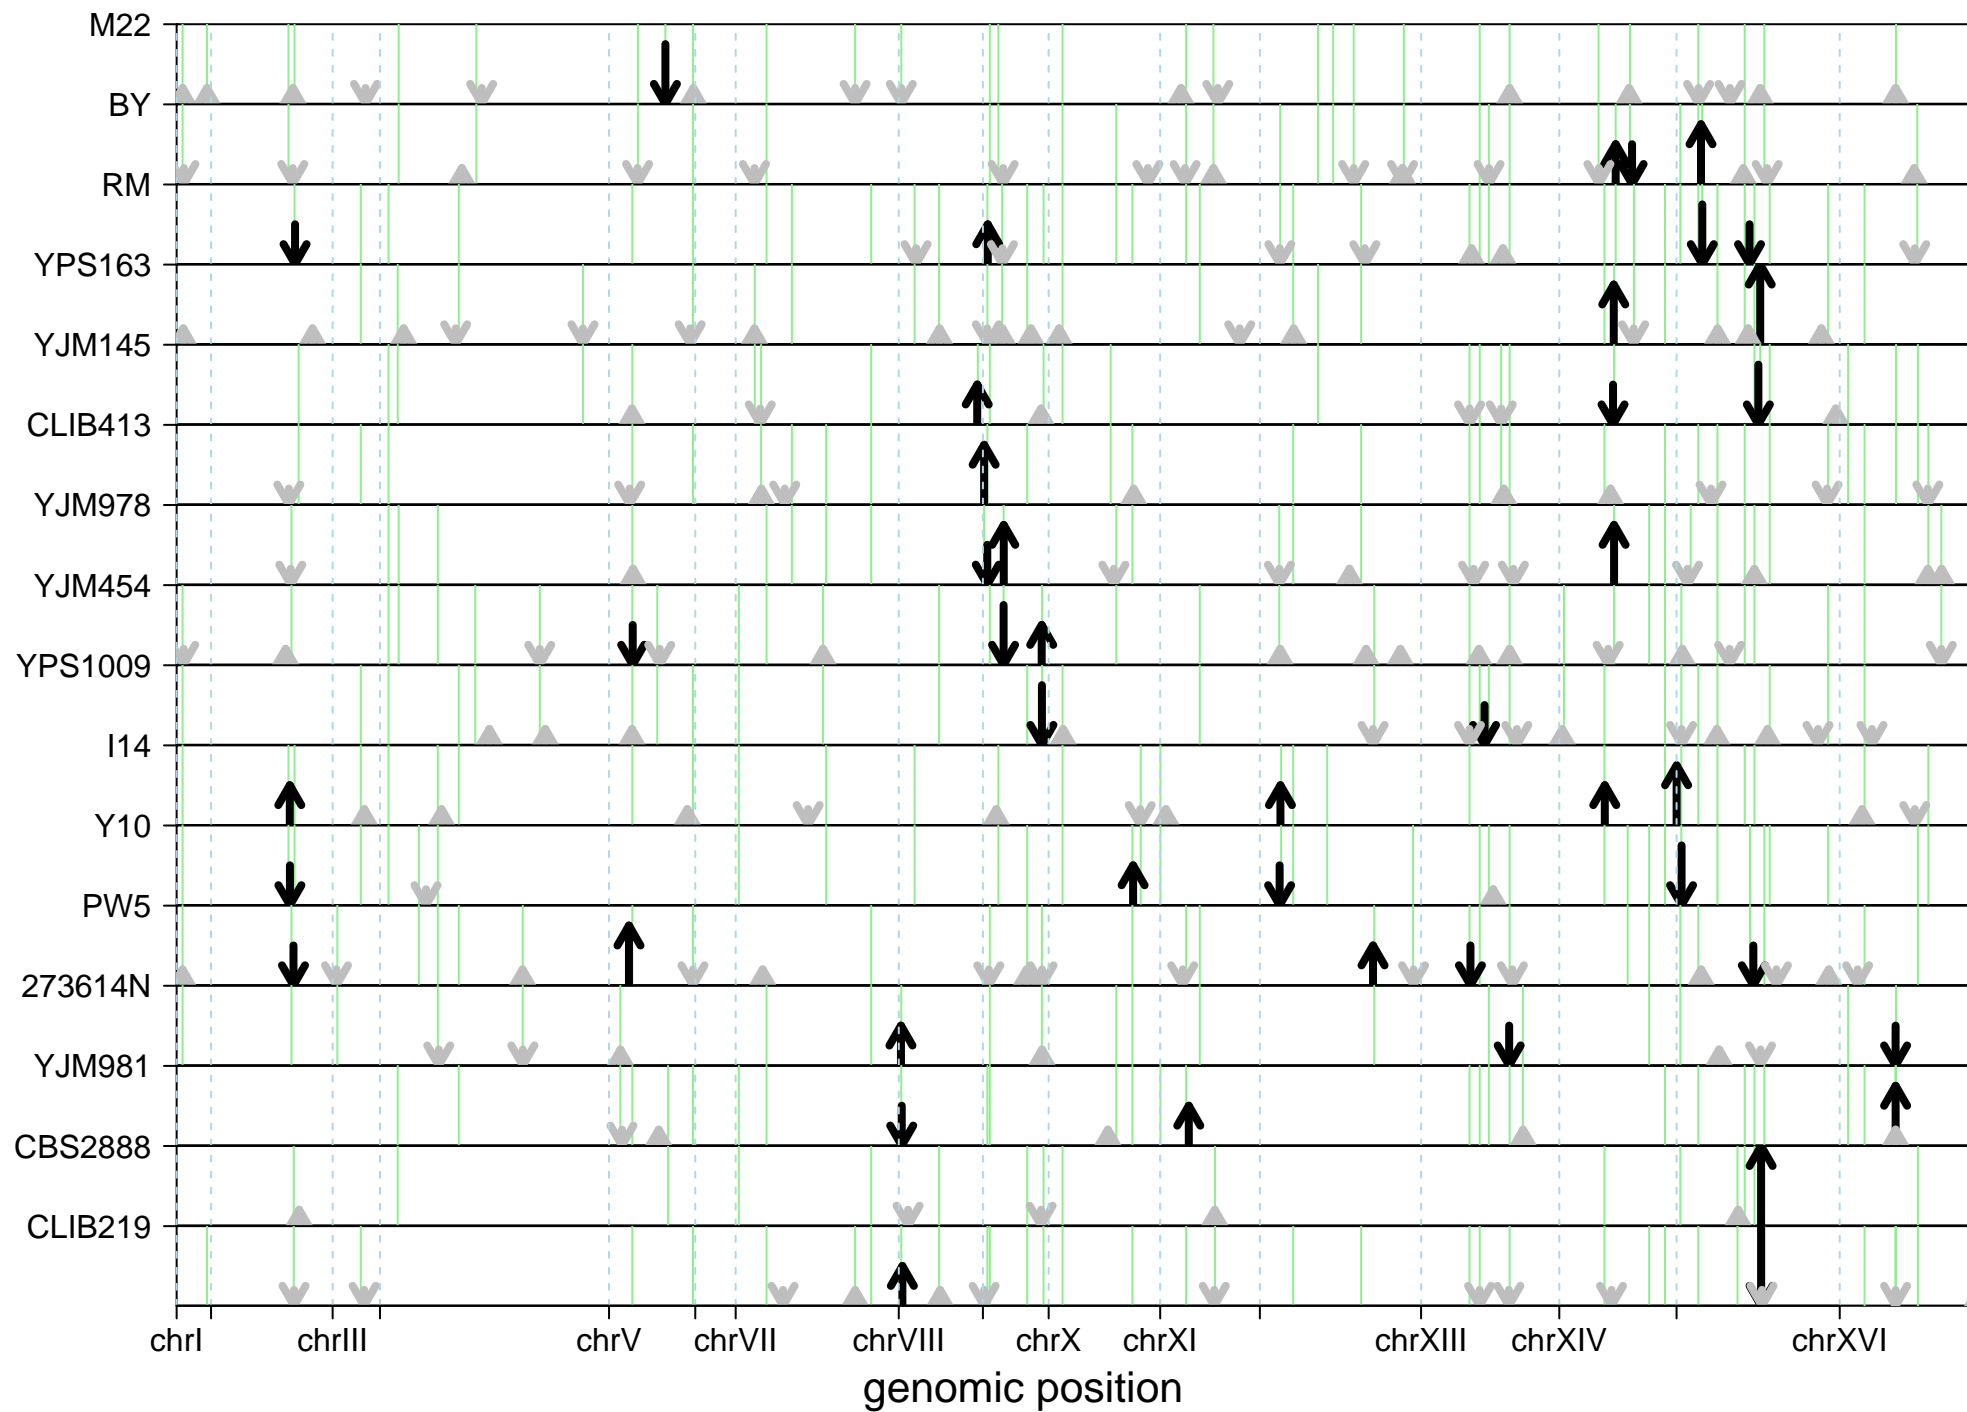

Methotrexate    258 total QTL    |    159 joint QTL

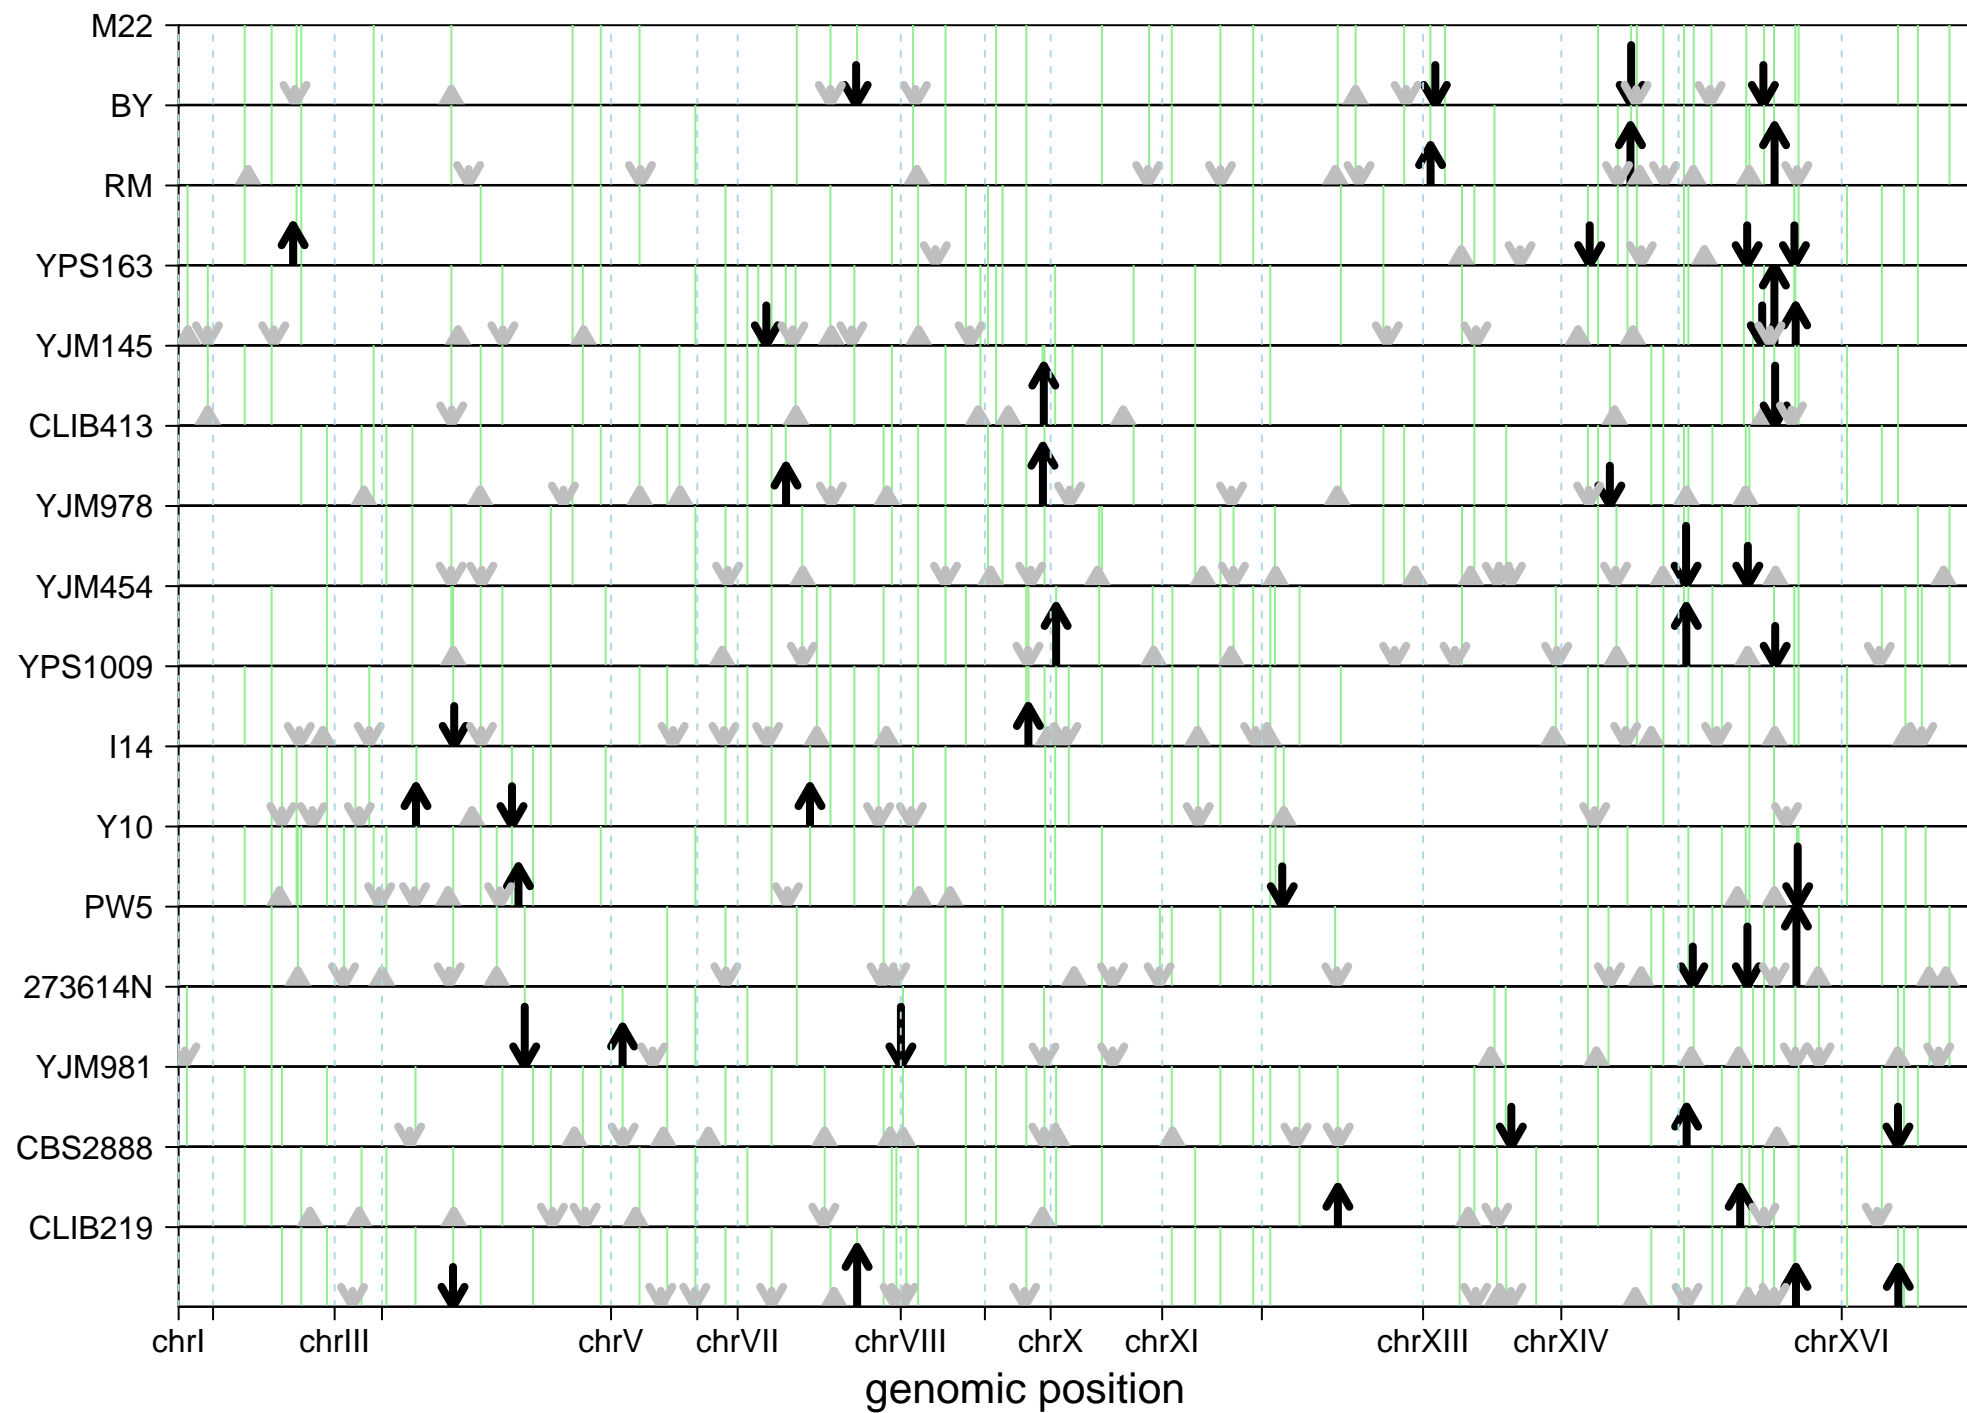



Paraquat    322 total QTL    |    170 joint QTL

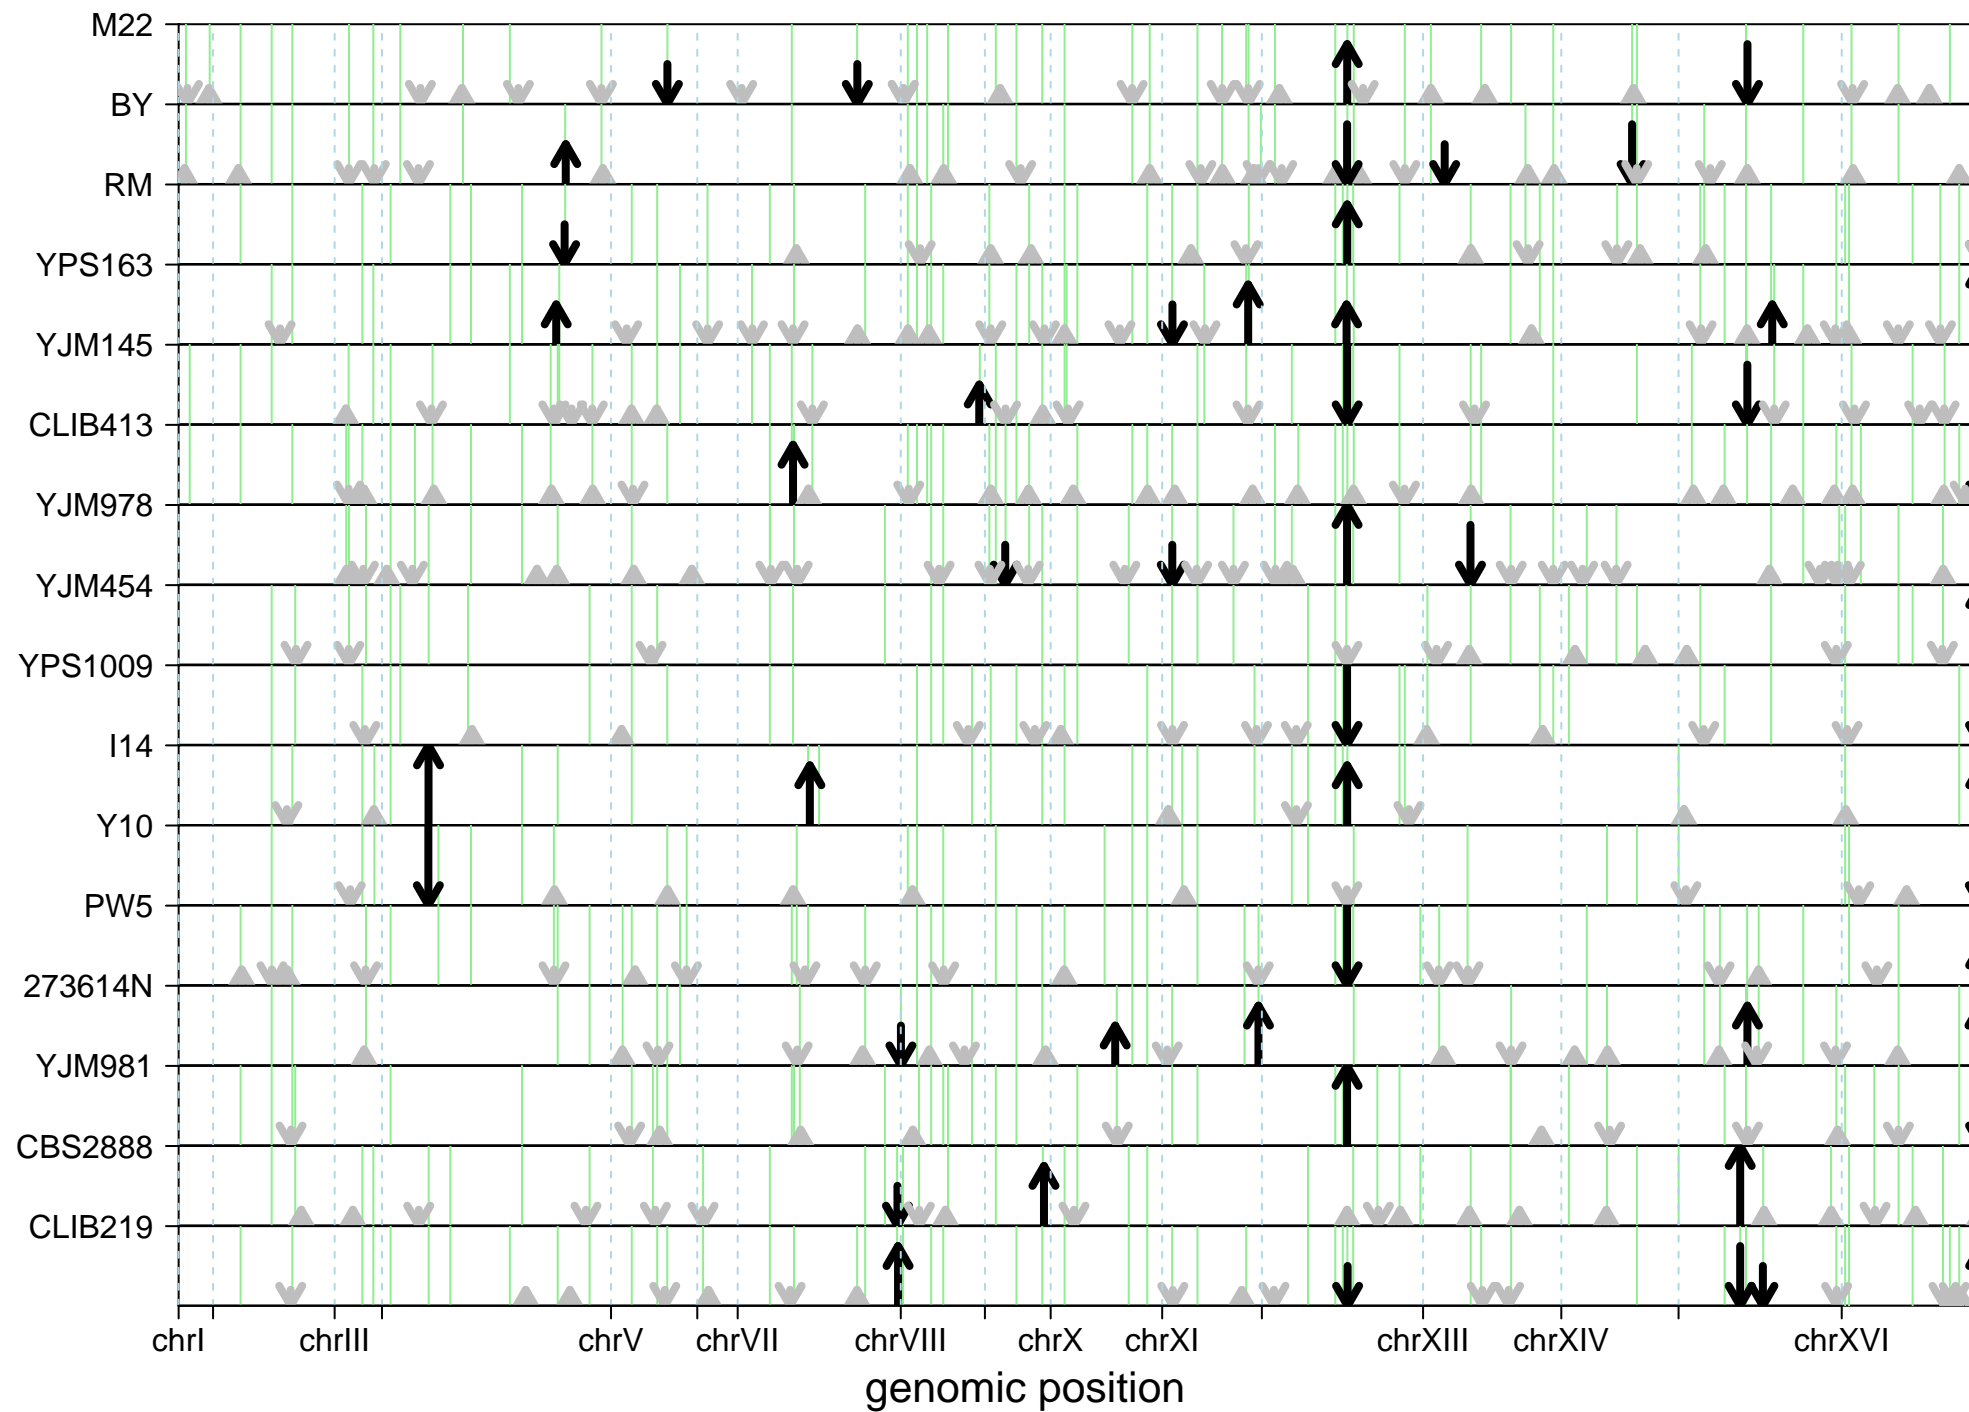



Raffinose 257 total QTL | 140 joint QTL

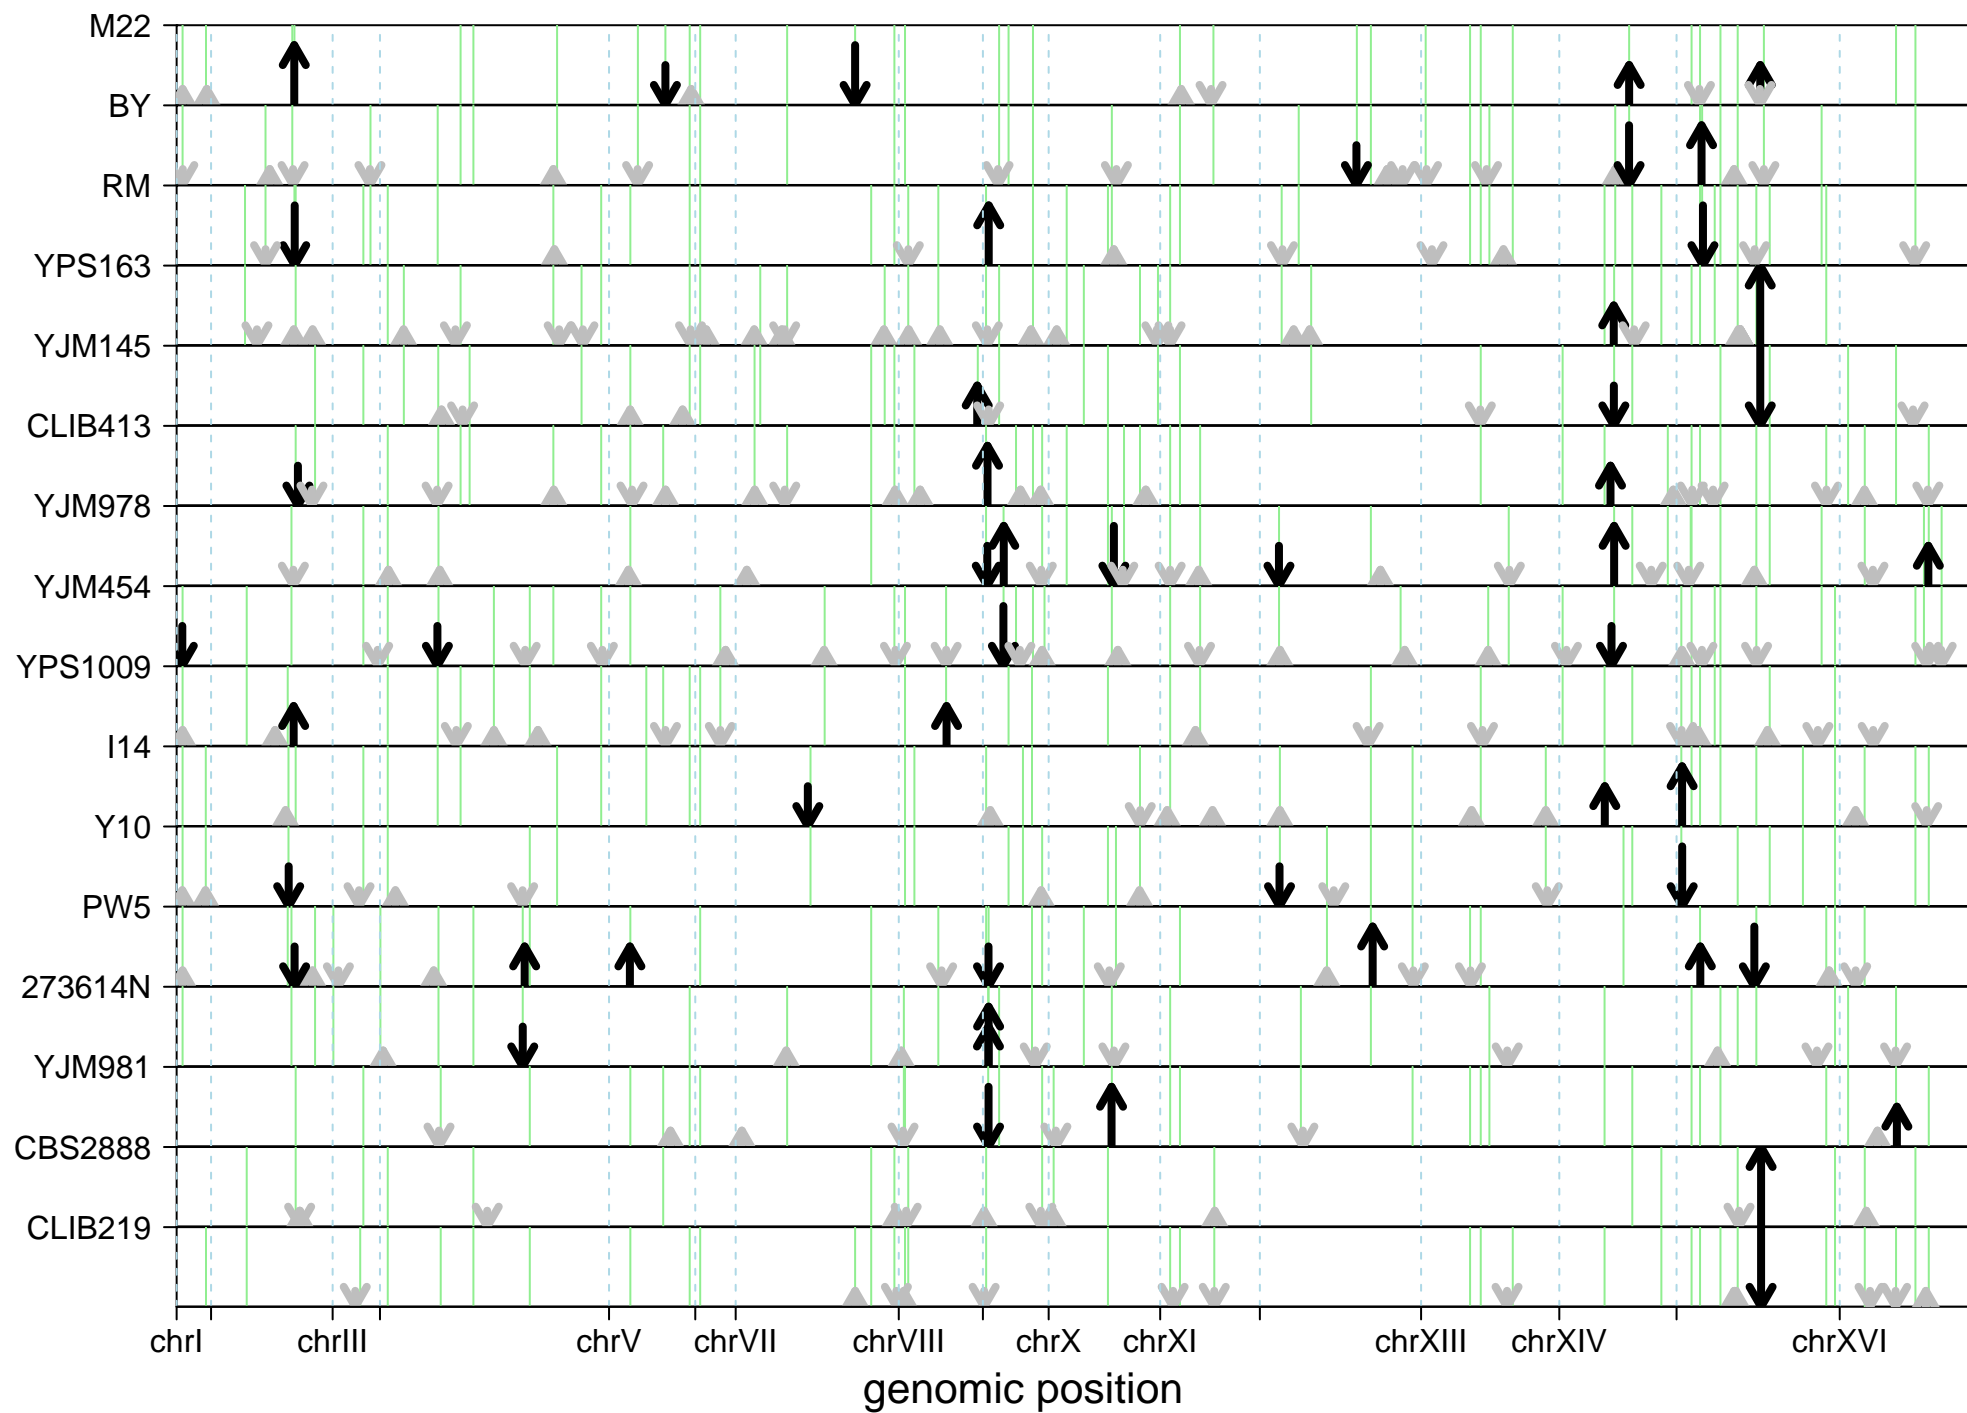

SDS    217 total QTL    |    117 joint QTL

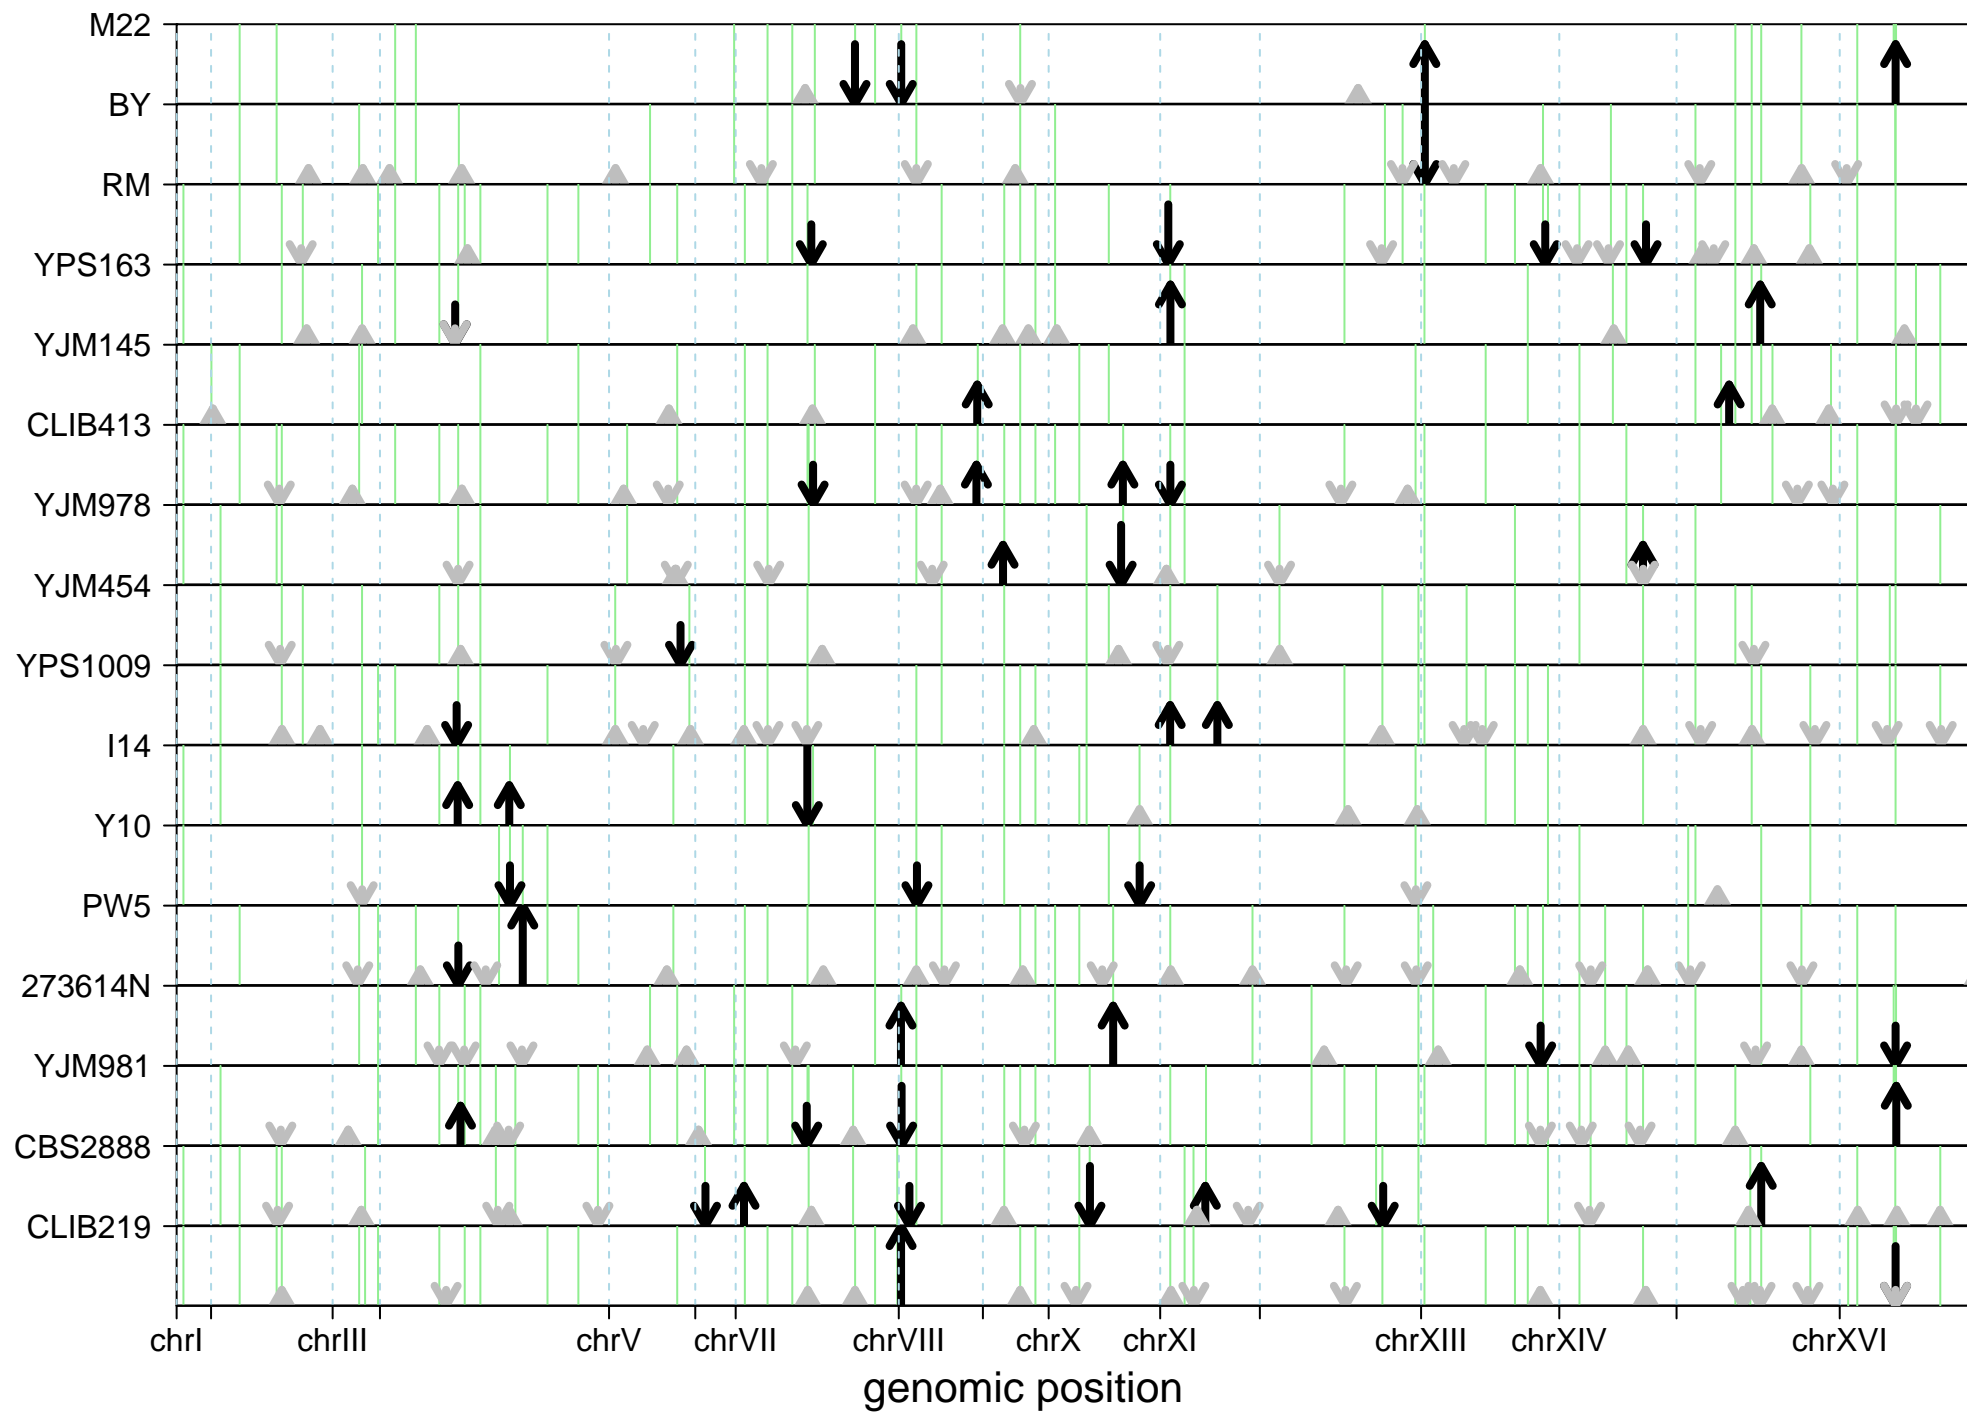

Sorbitol 223 total QTL | 124 joint QTL

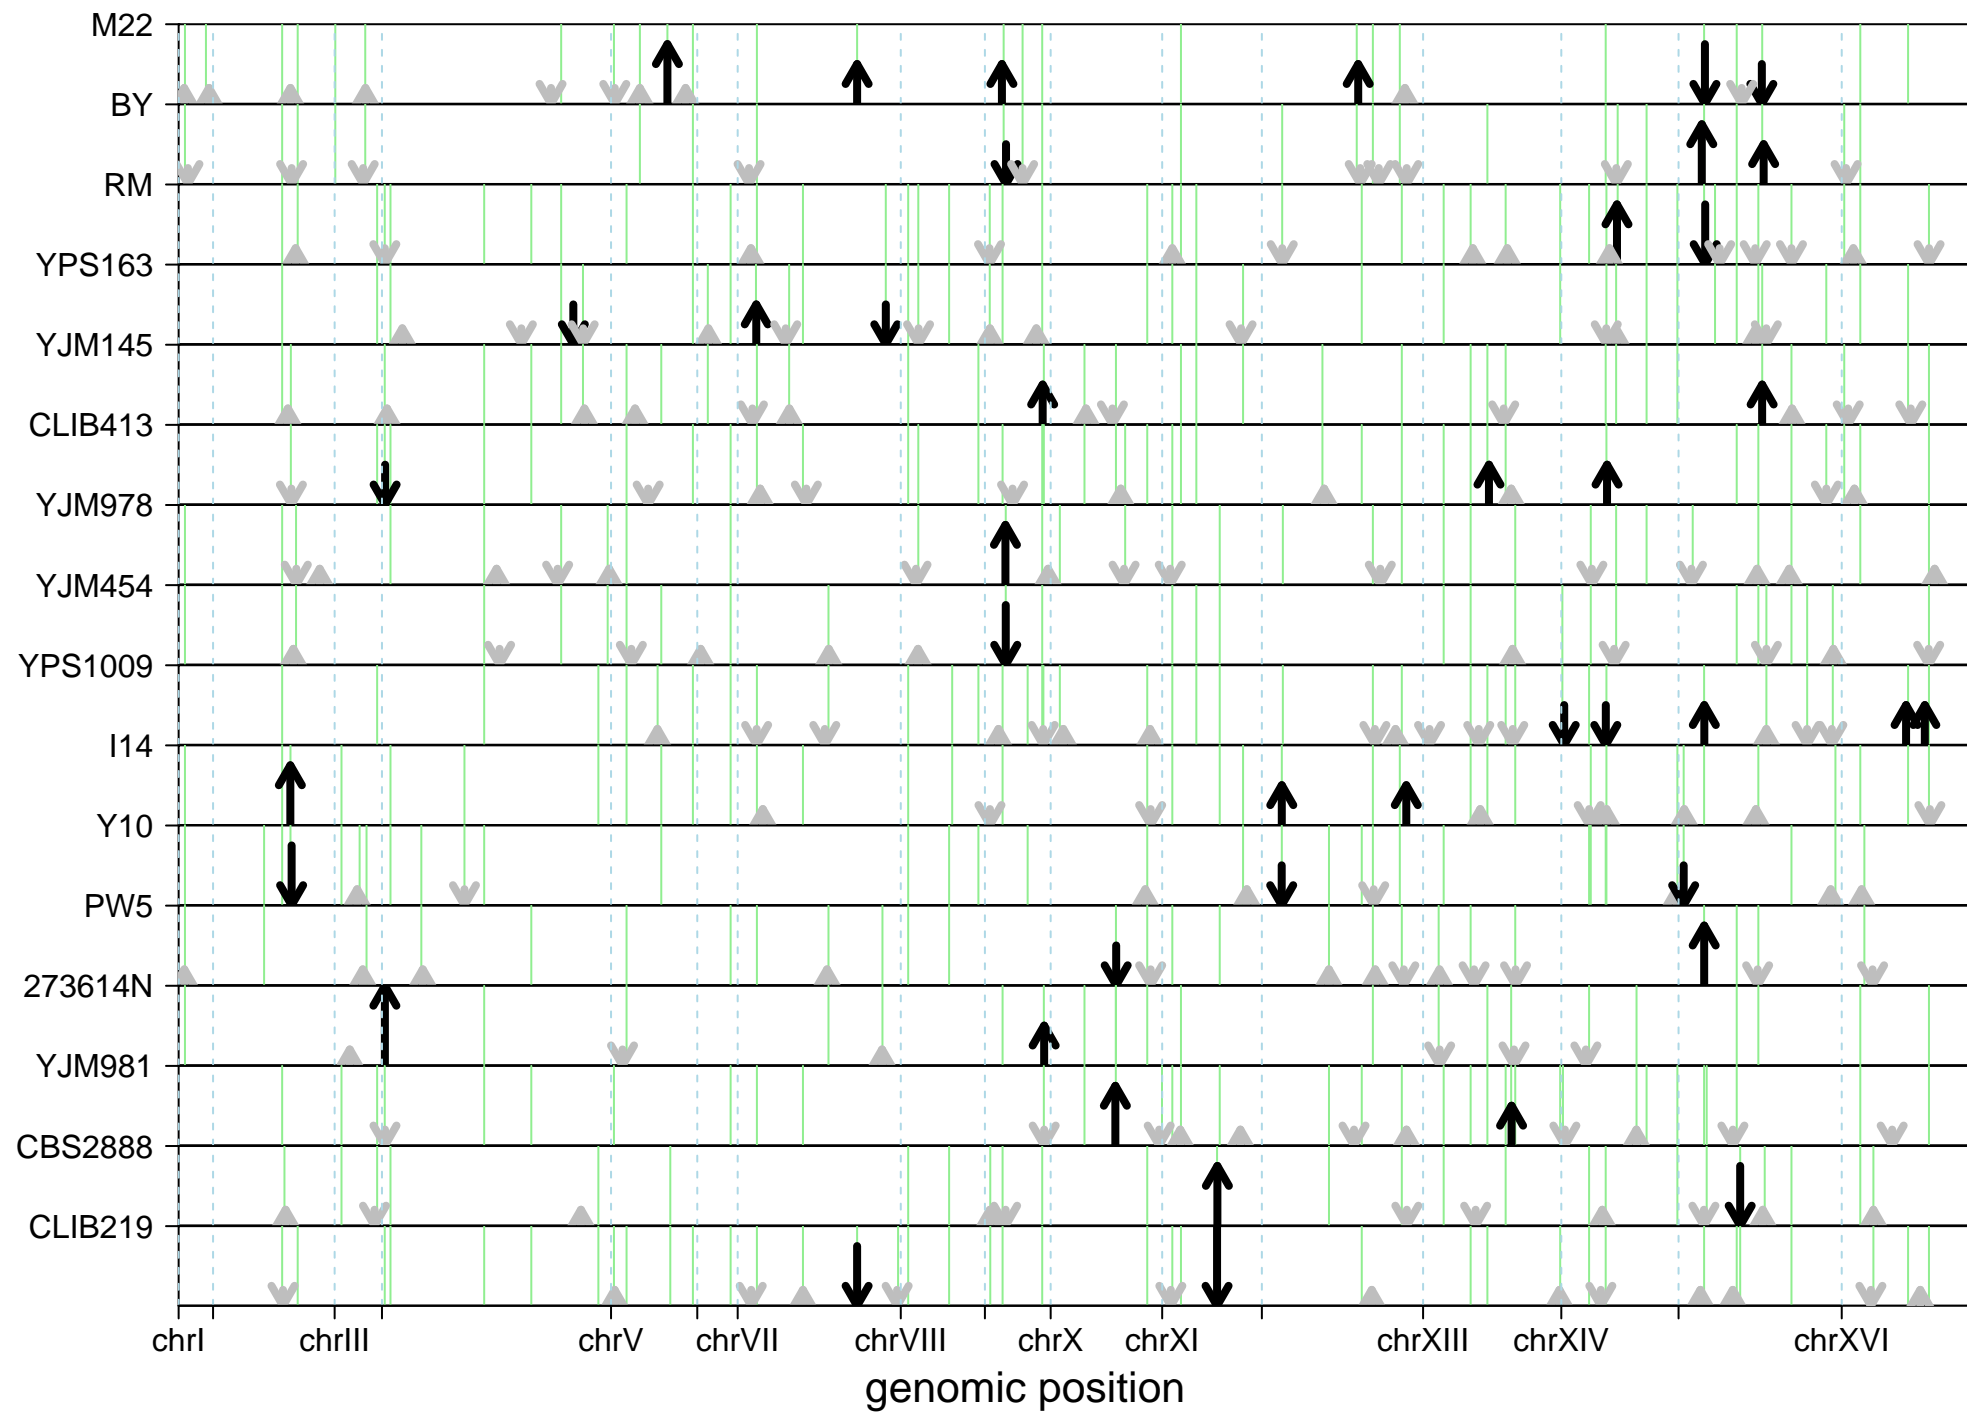

**| 104 joint QTL**

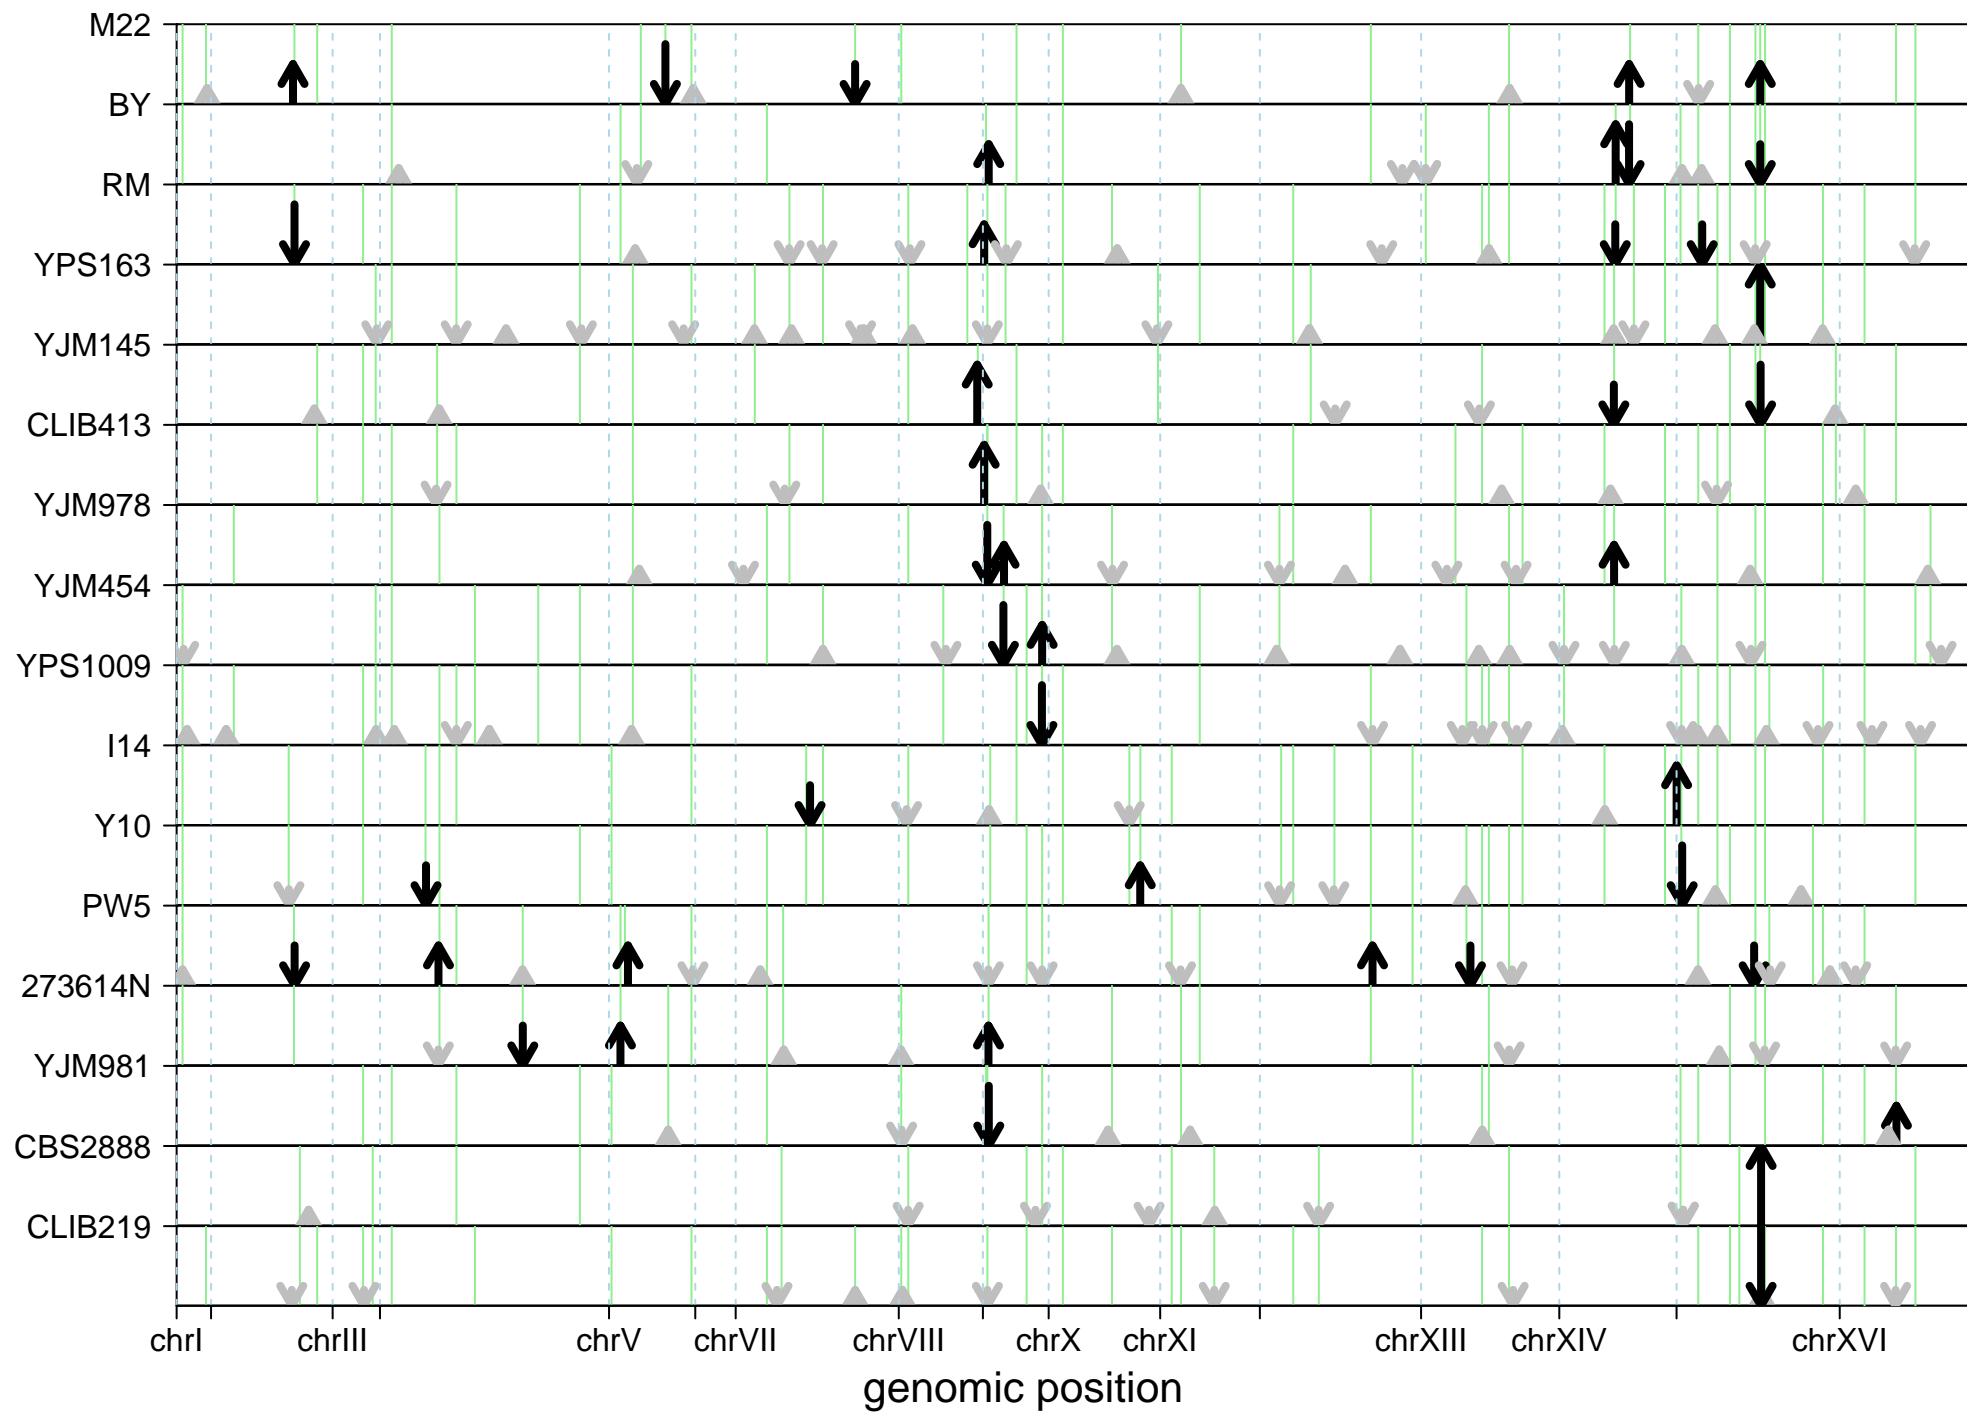

## 74 joint QTL

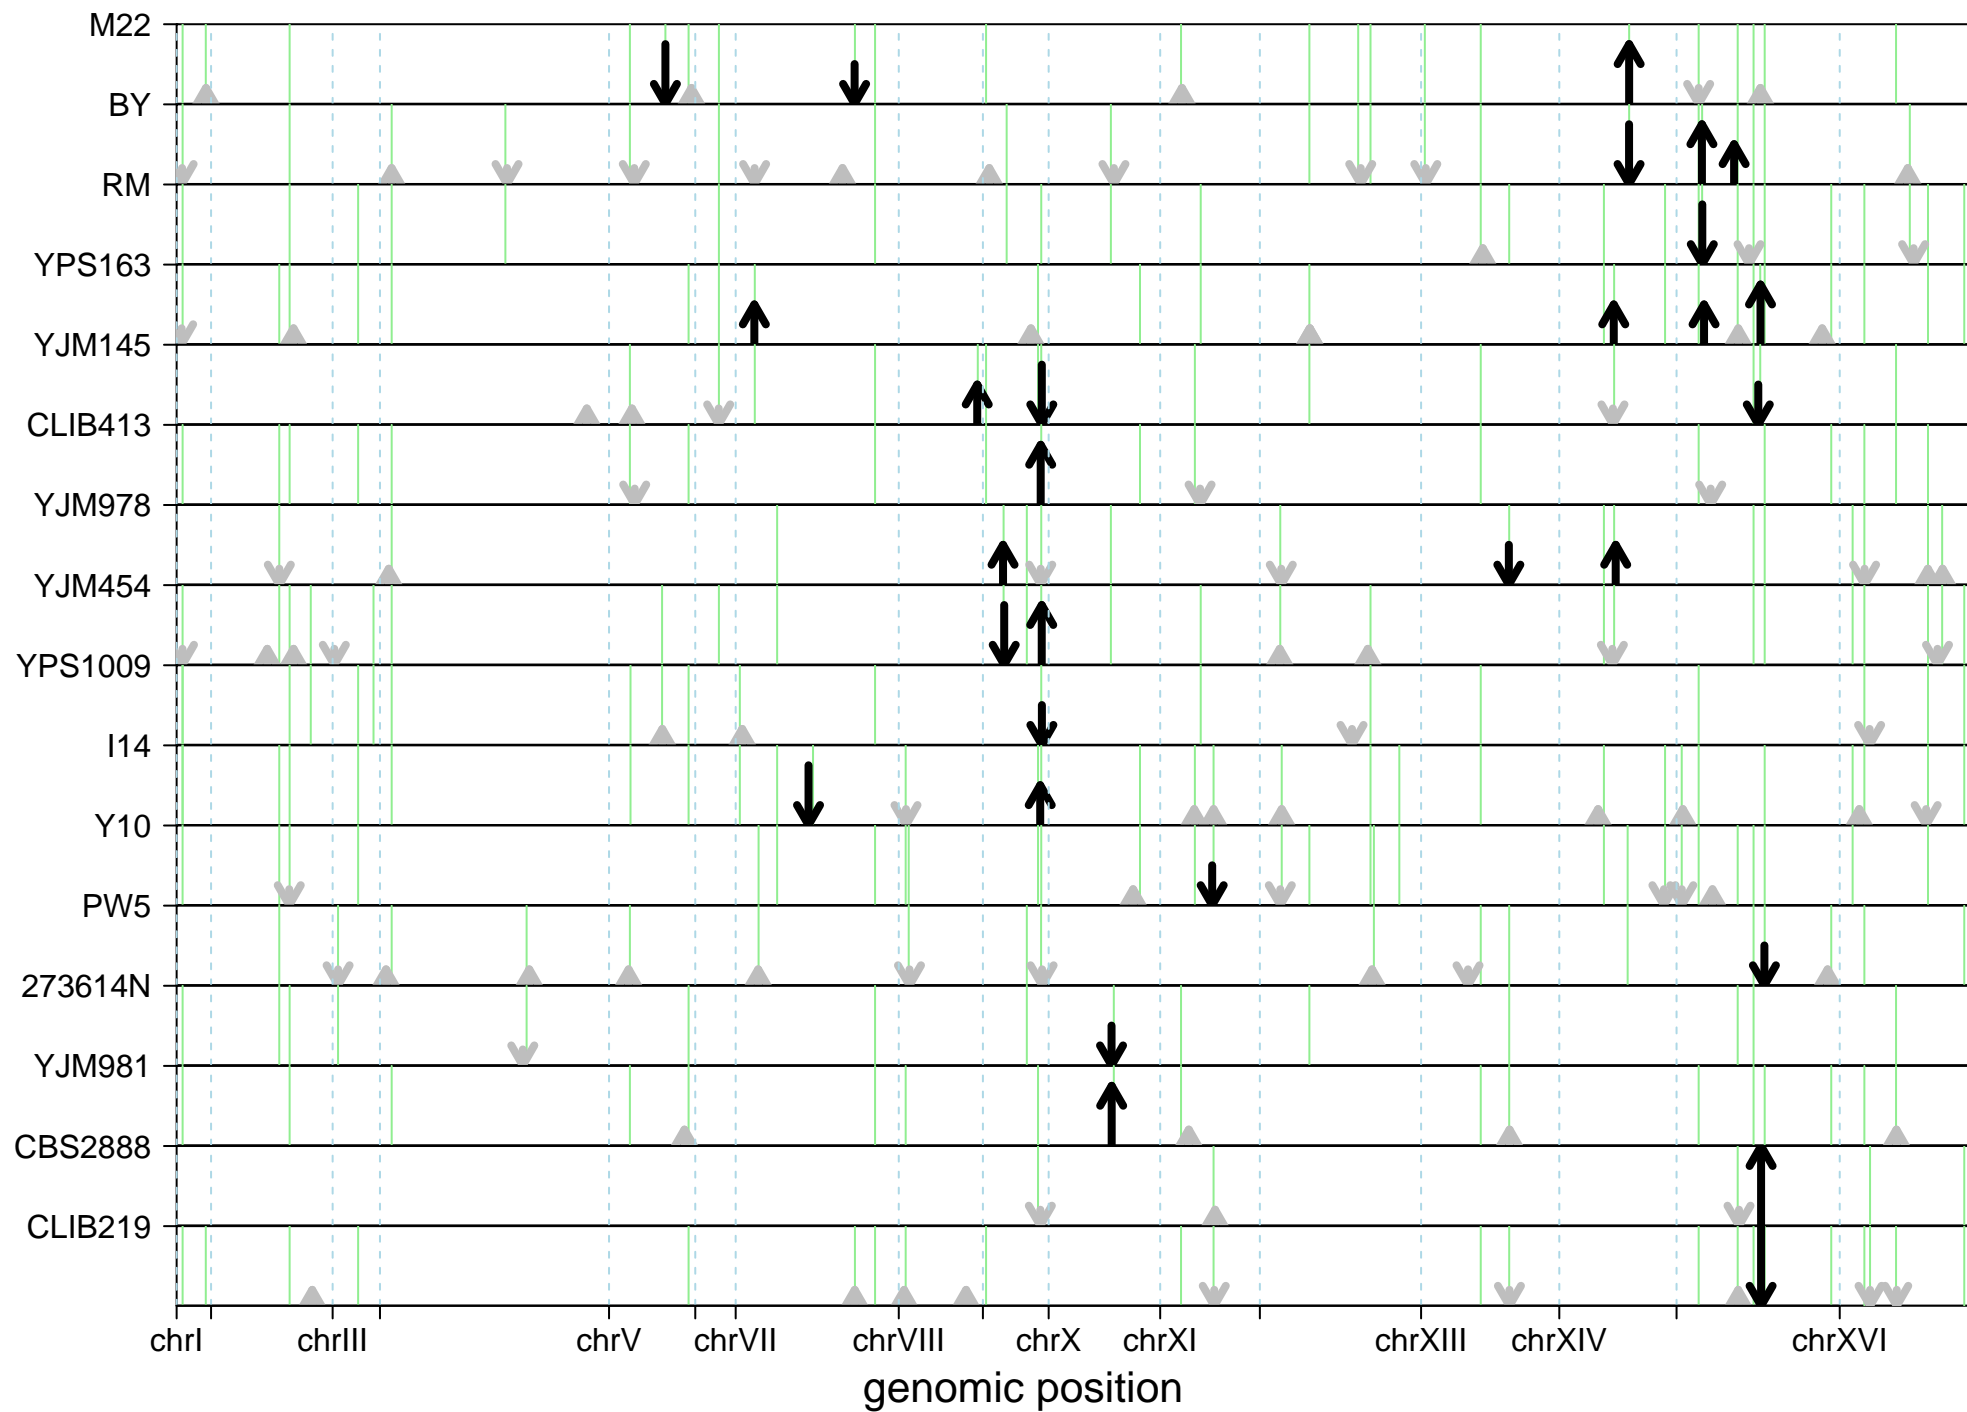

Tunicamycin    344 total QTL    |    195 joint QTL

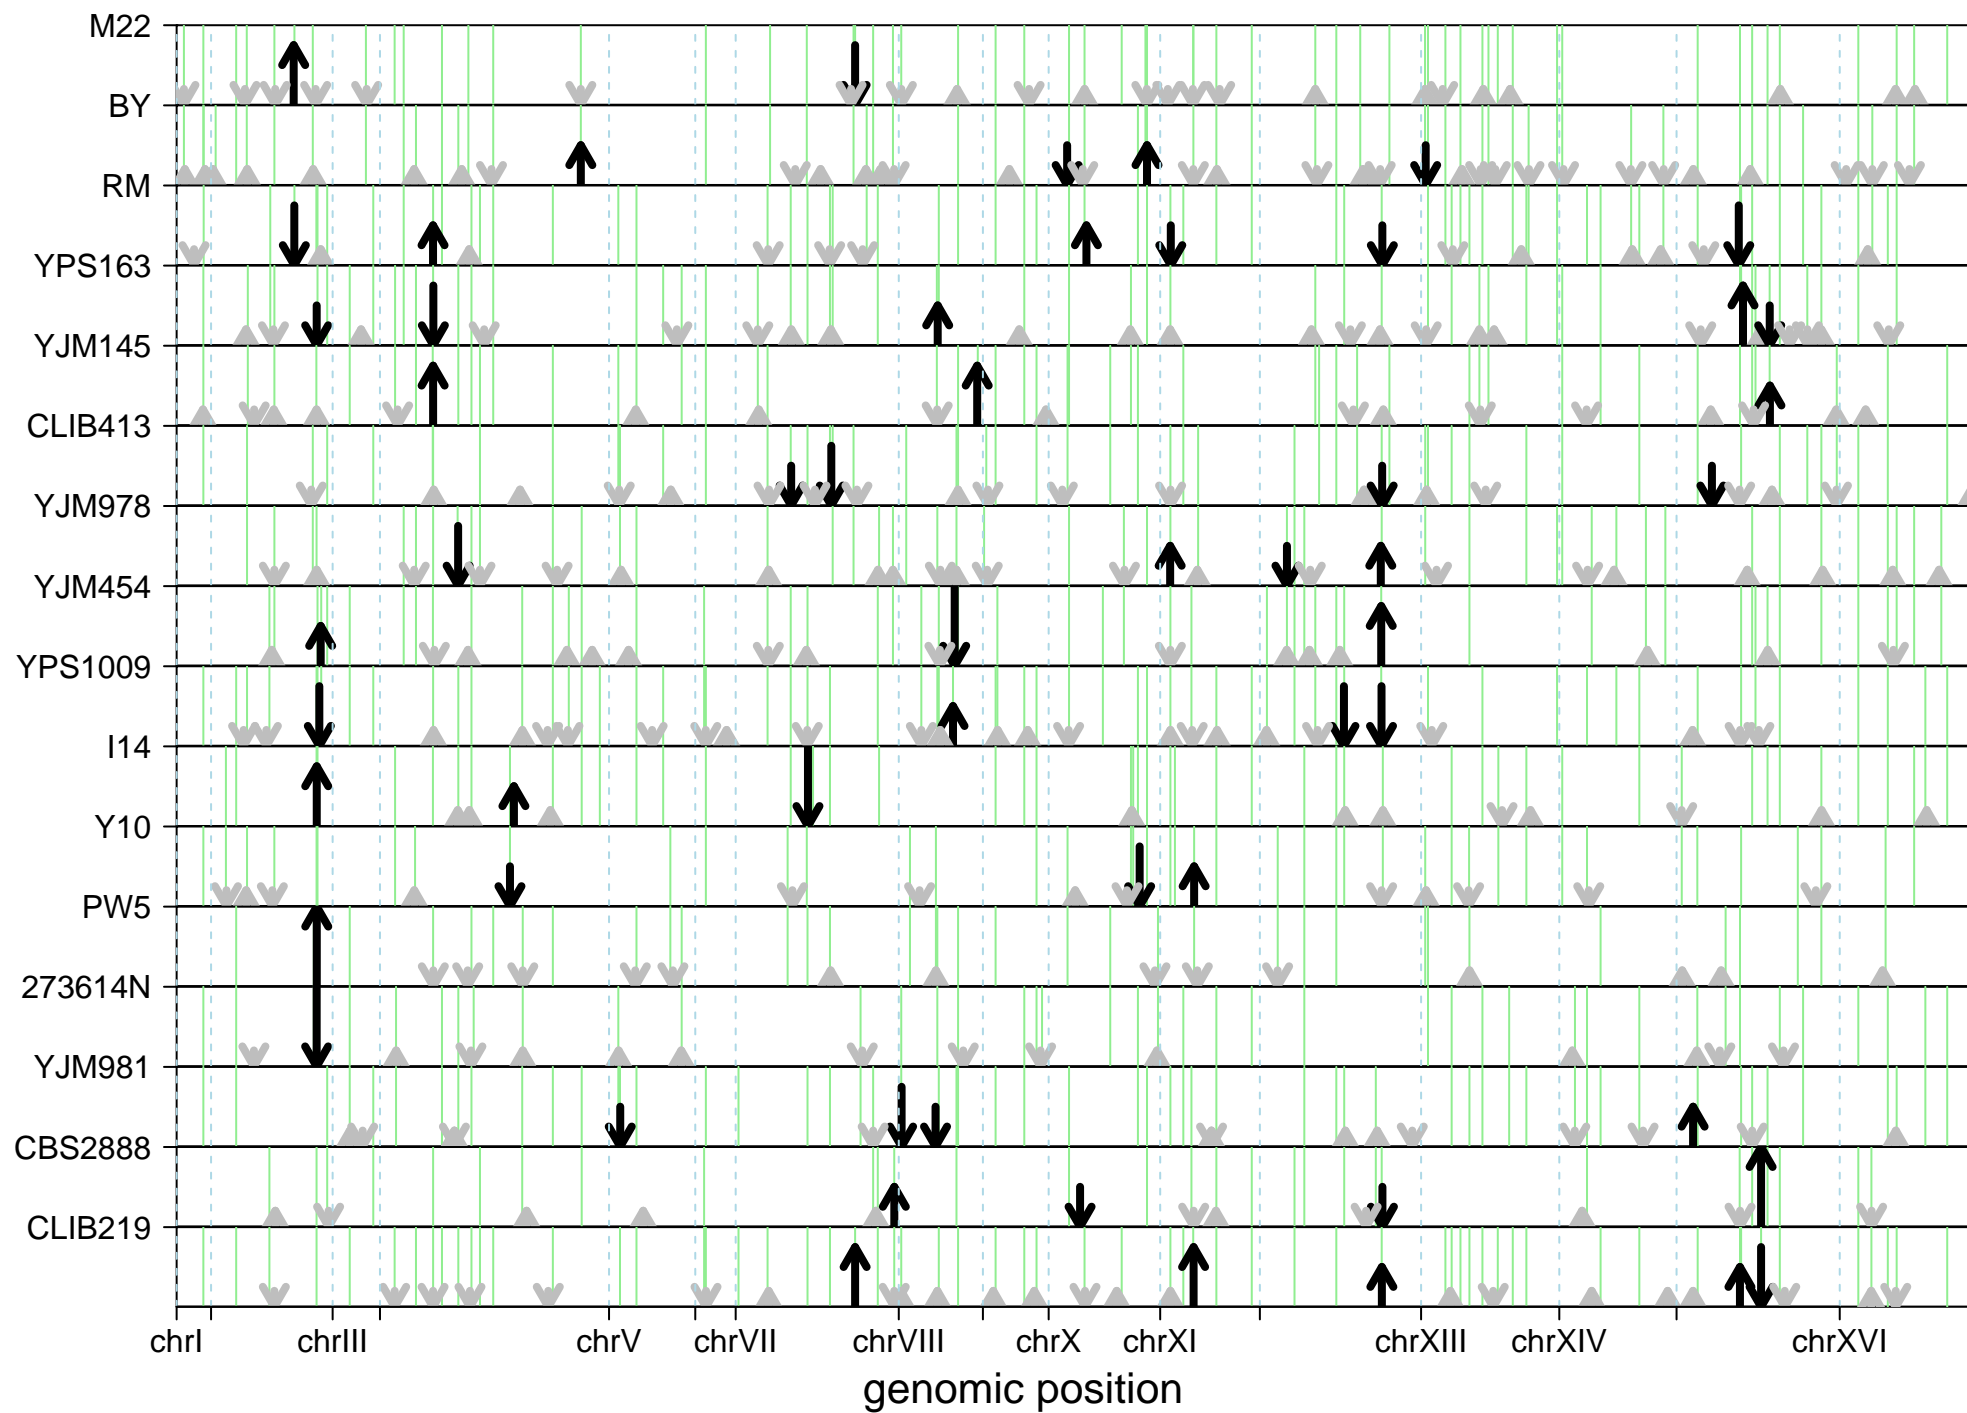

Xylose 126 total QTL | 82 joint QTL

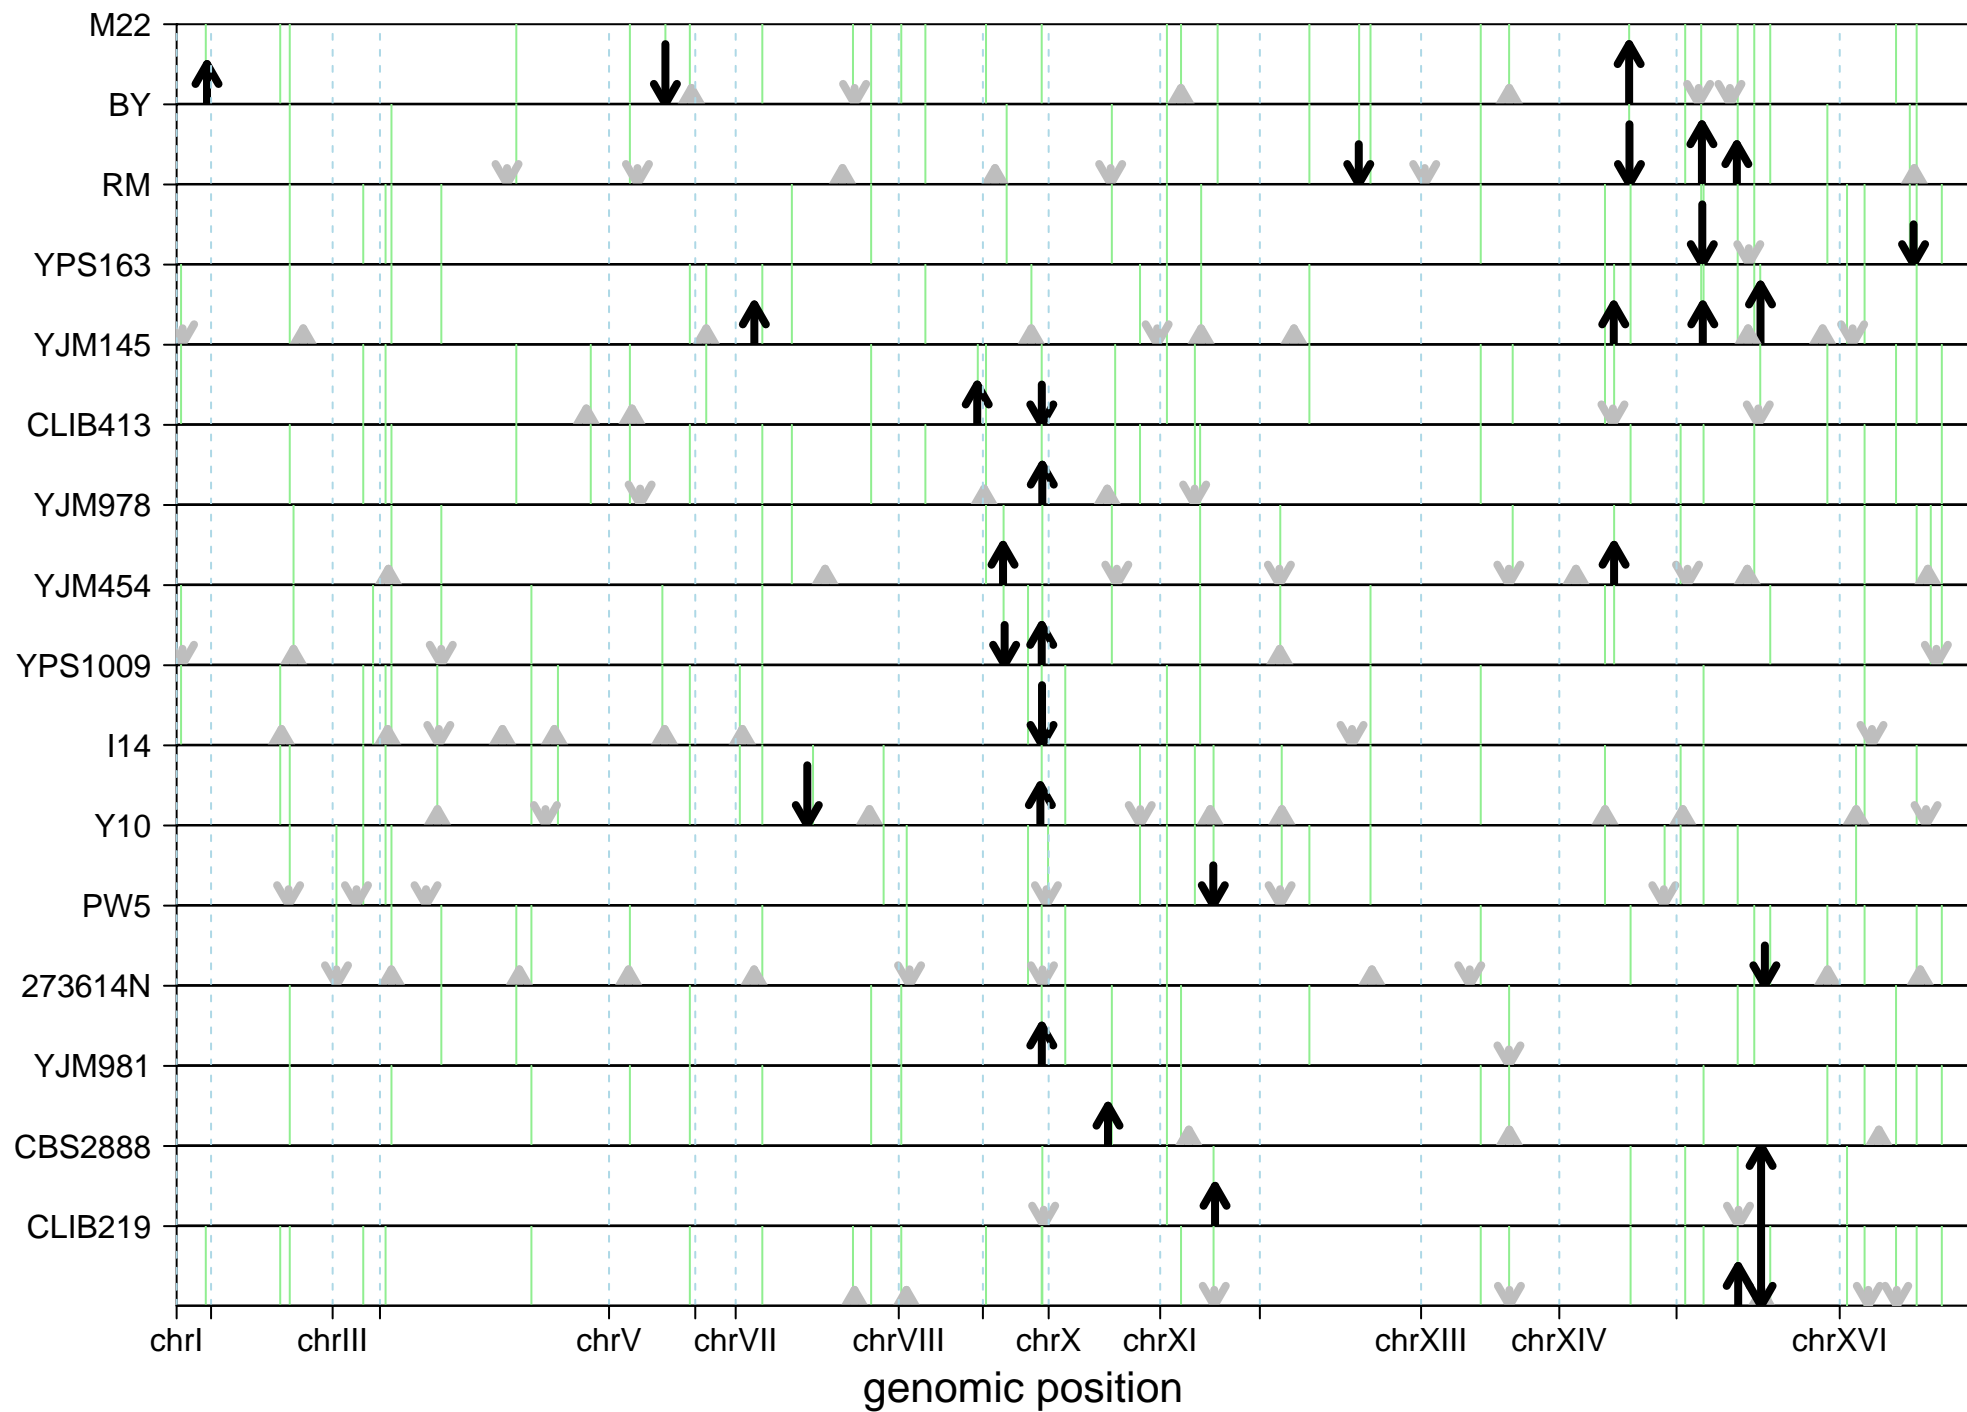

**YNB**

**118 total QTL**

| 88 joint QTL

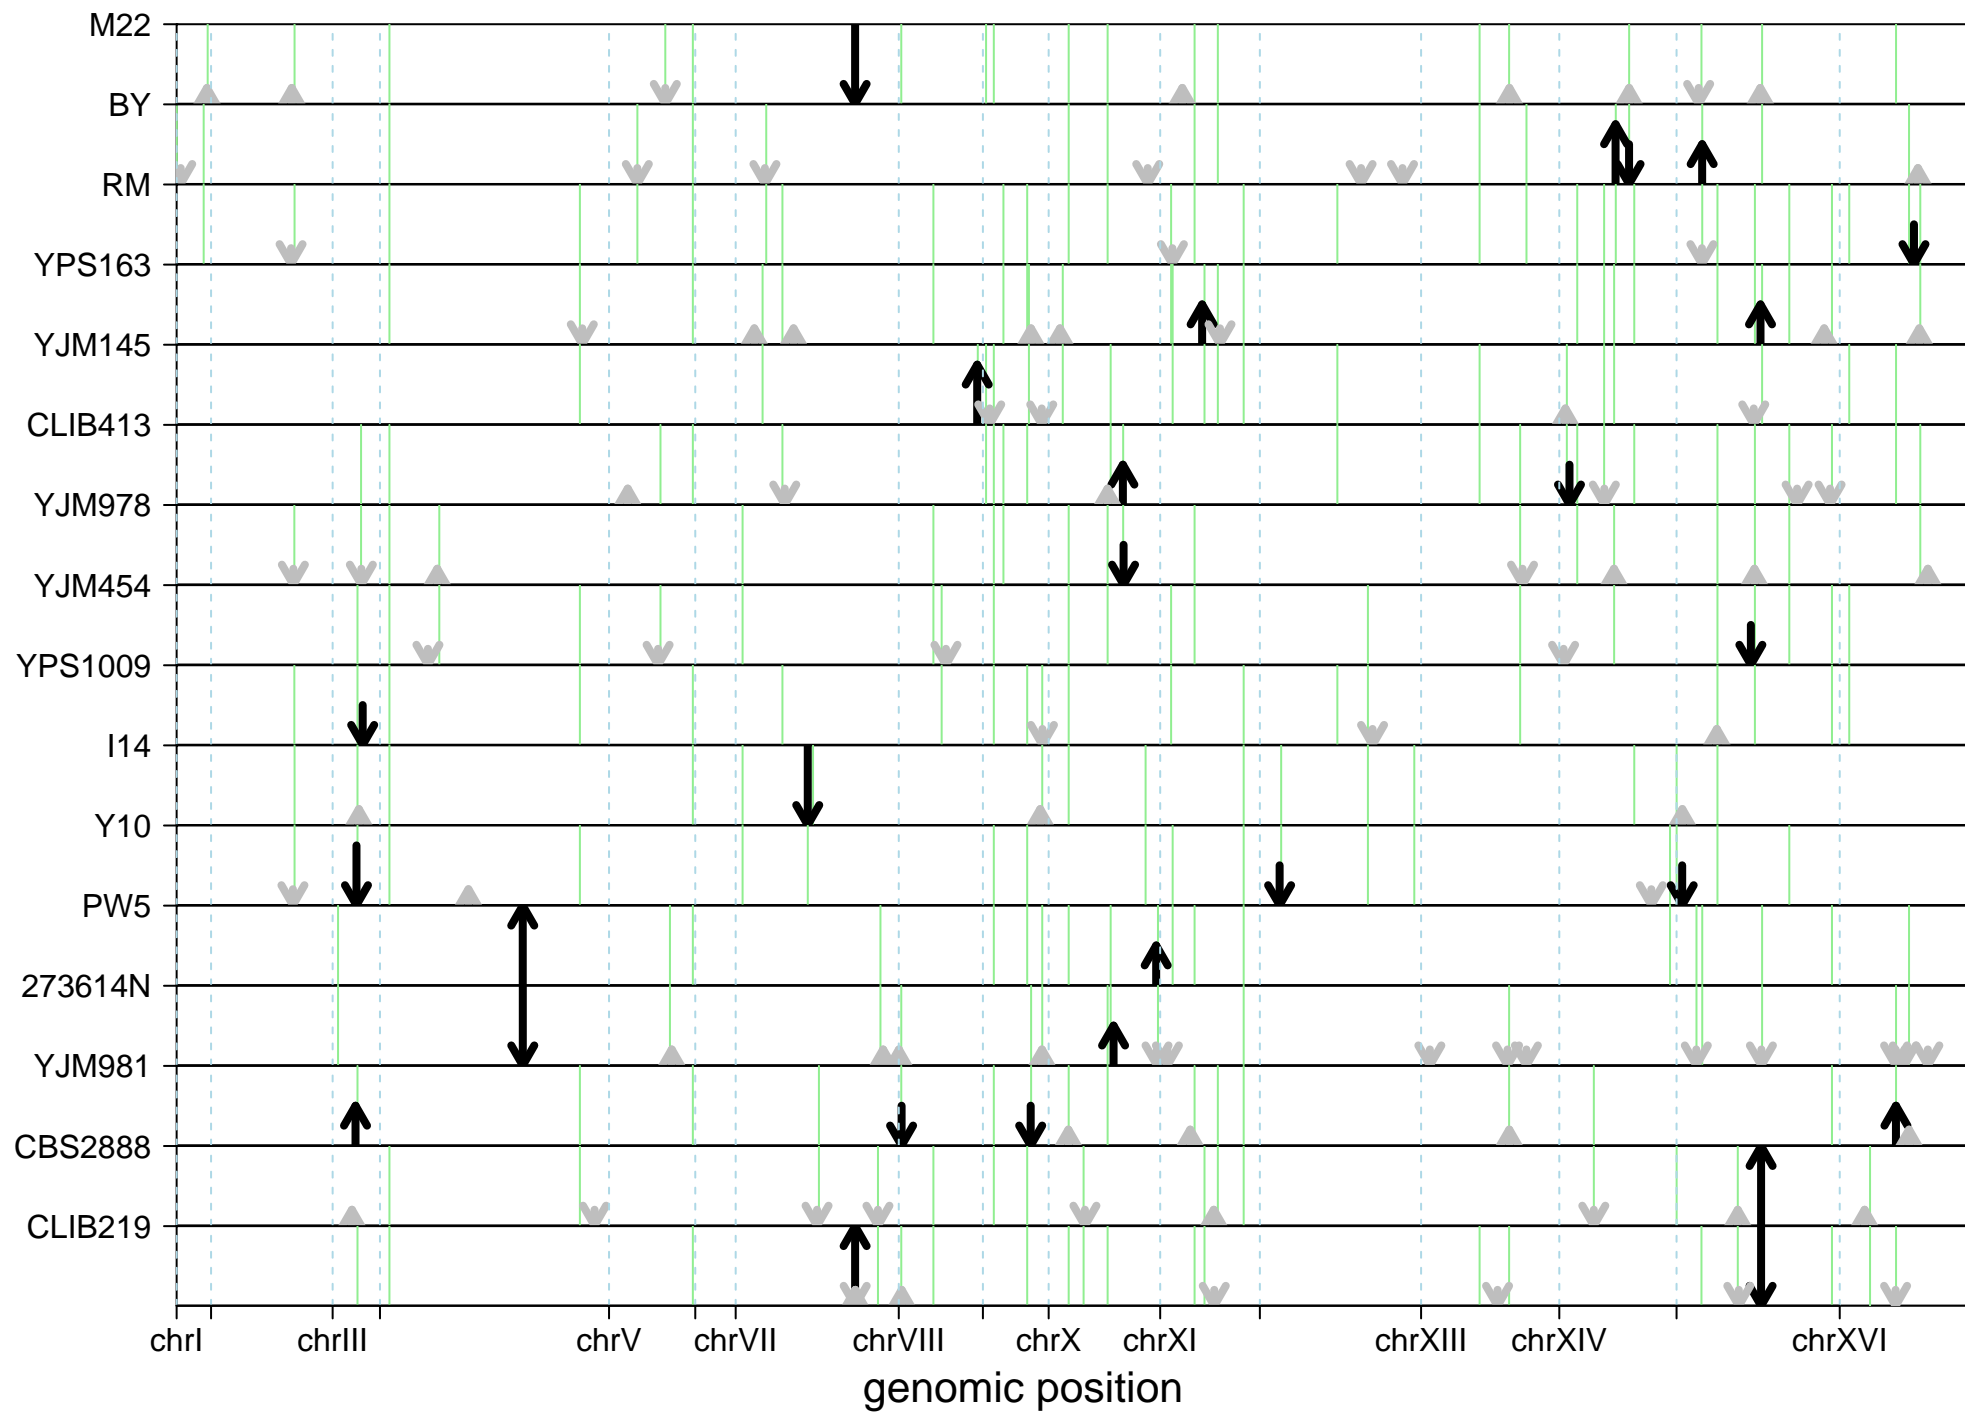



YNB ph3    60 total QTL    |    52 joint QTL

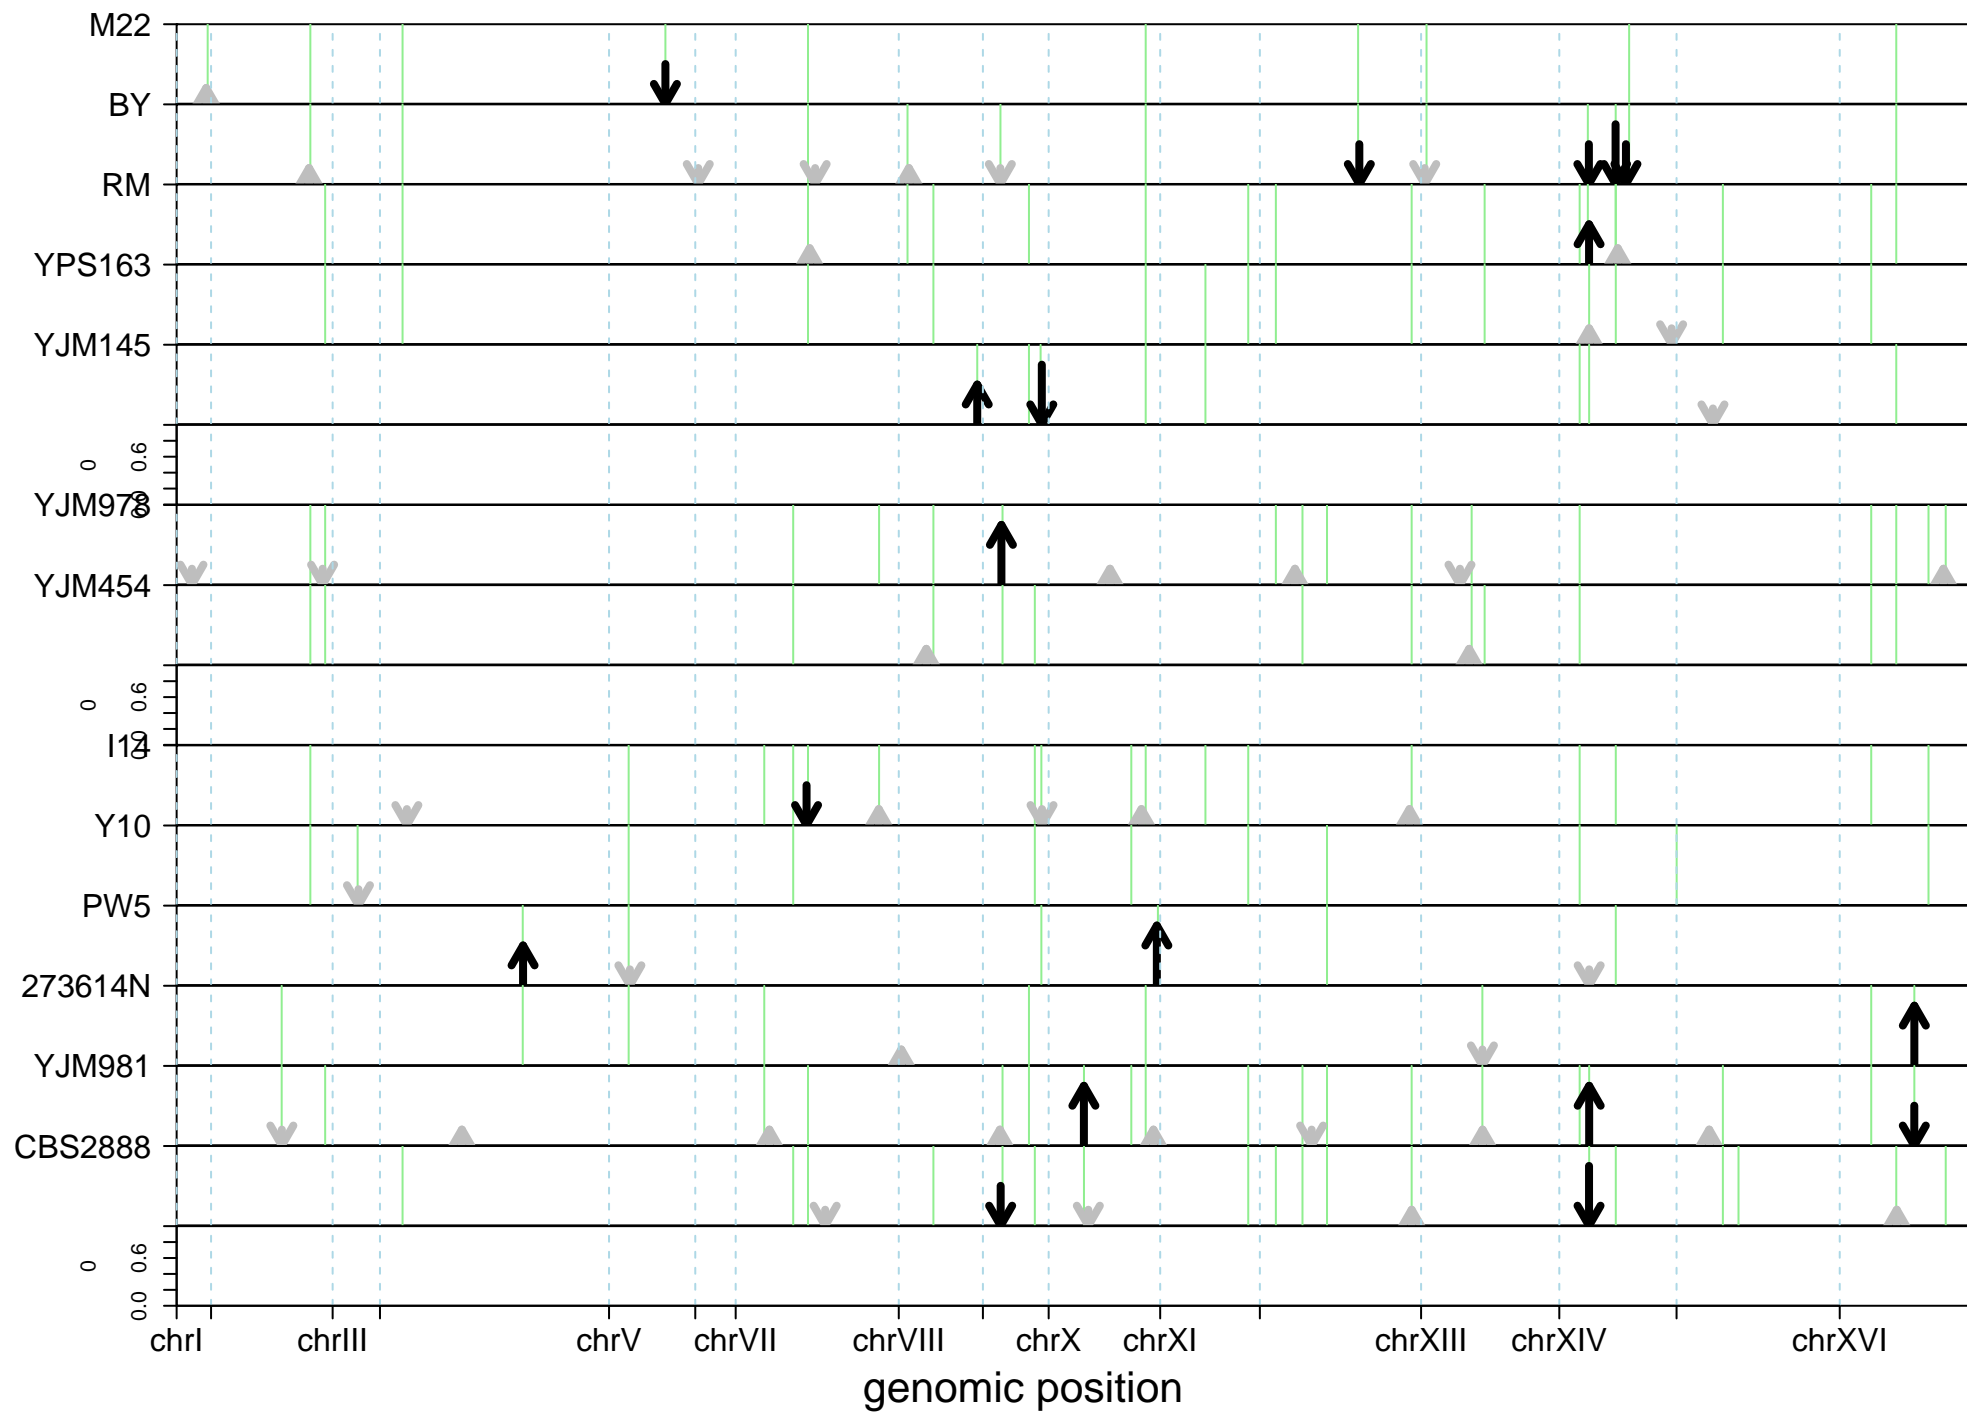

YNB ph8    126 total QTL    |    76 joint QTL

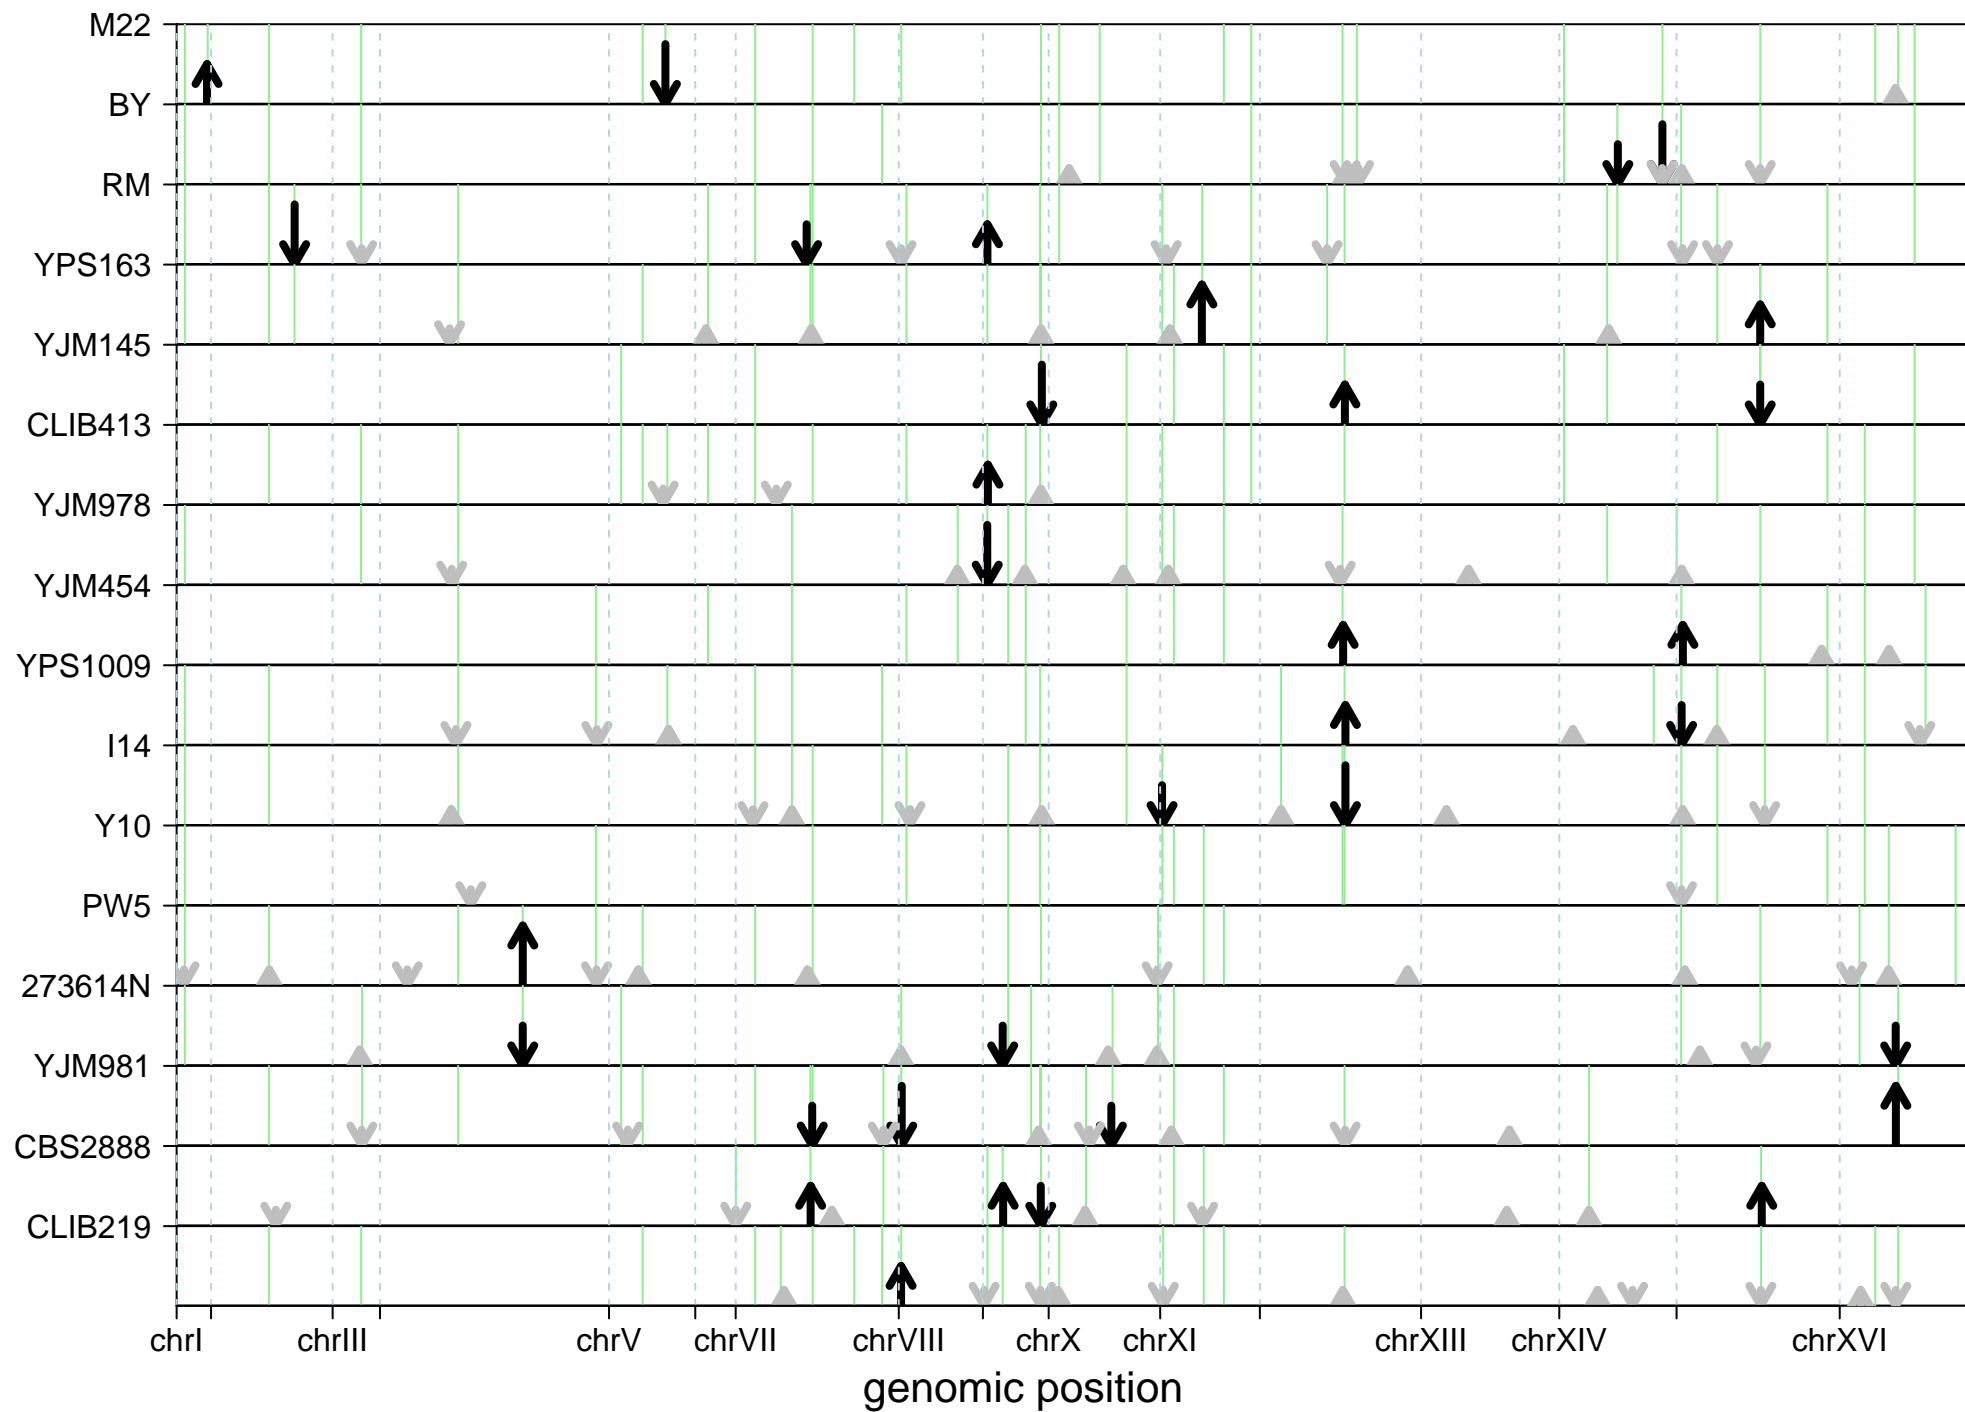

**YPD    198 total QTL    |    106 joint QTL**

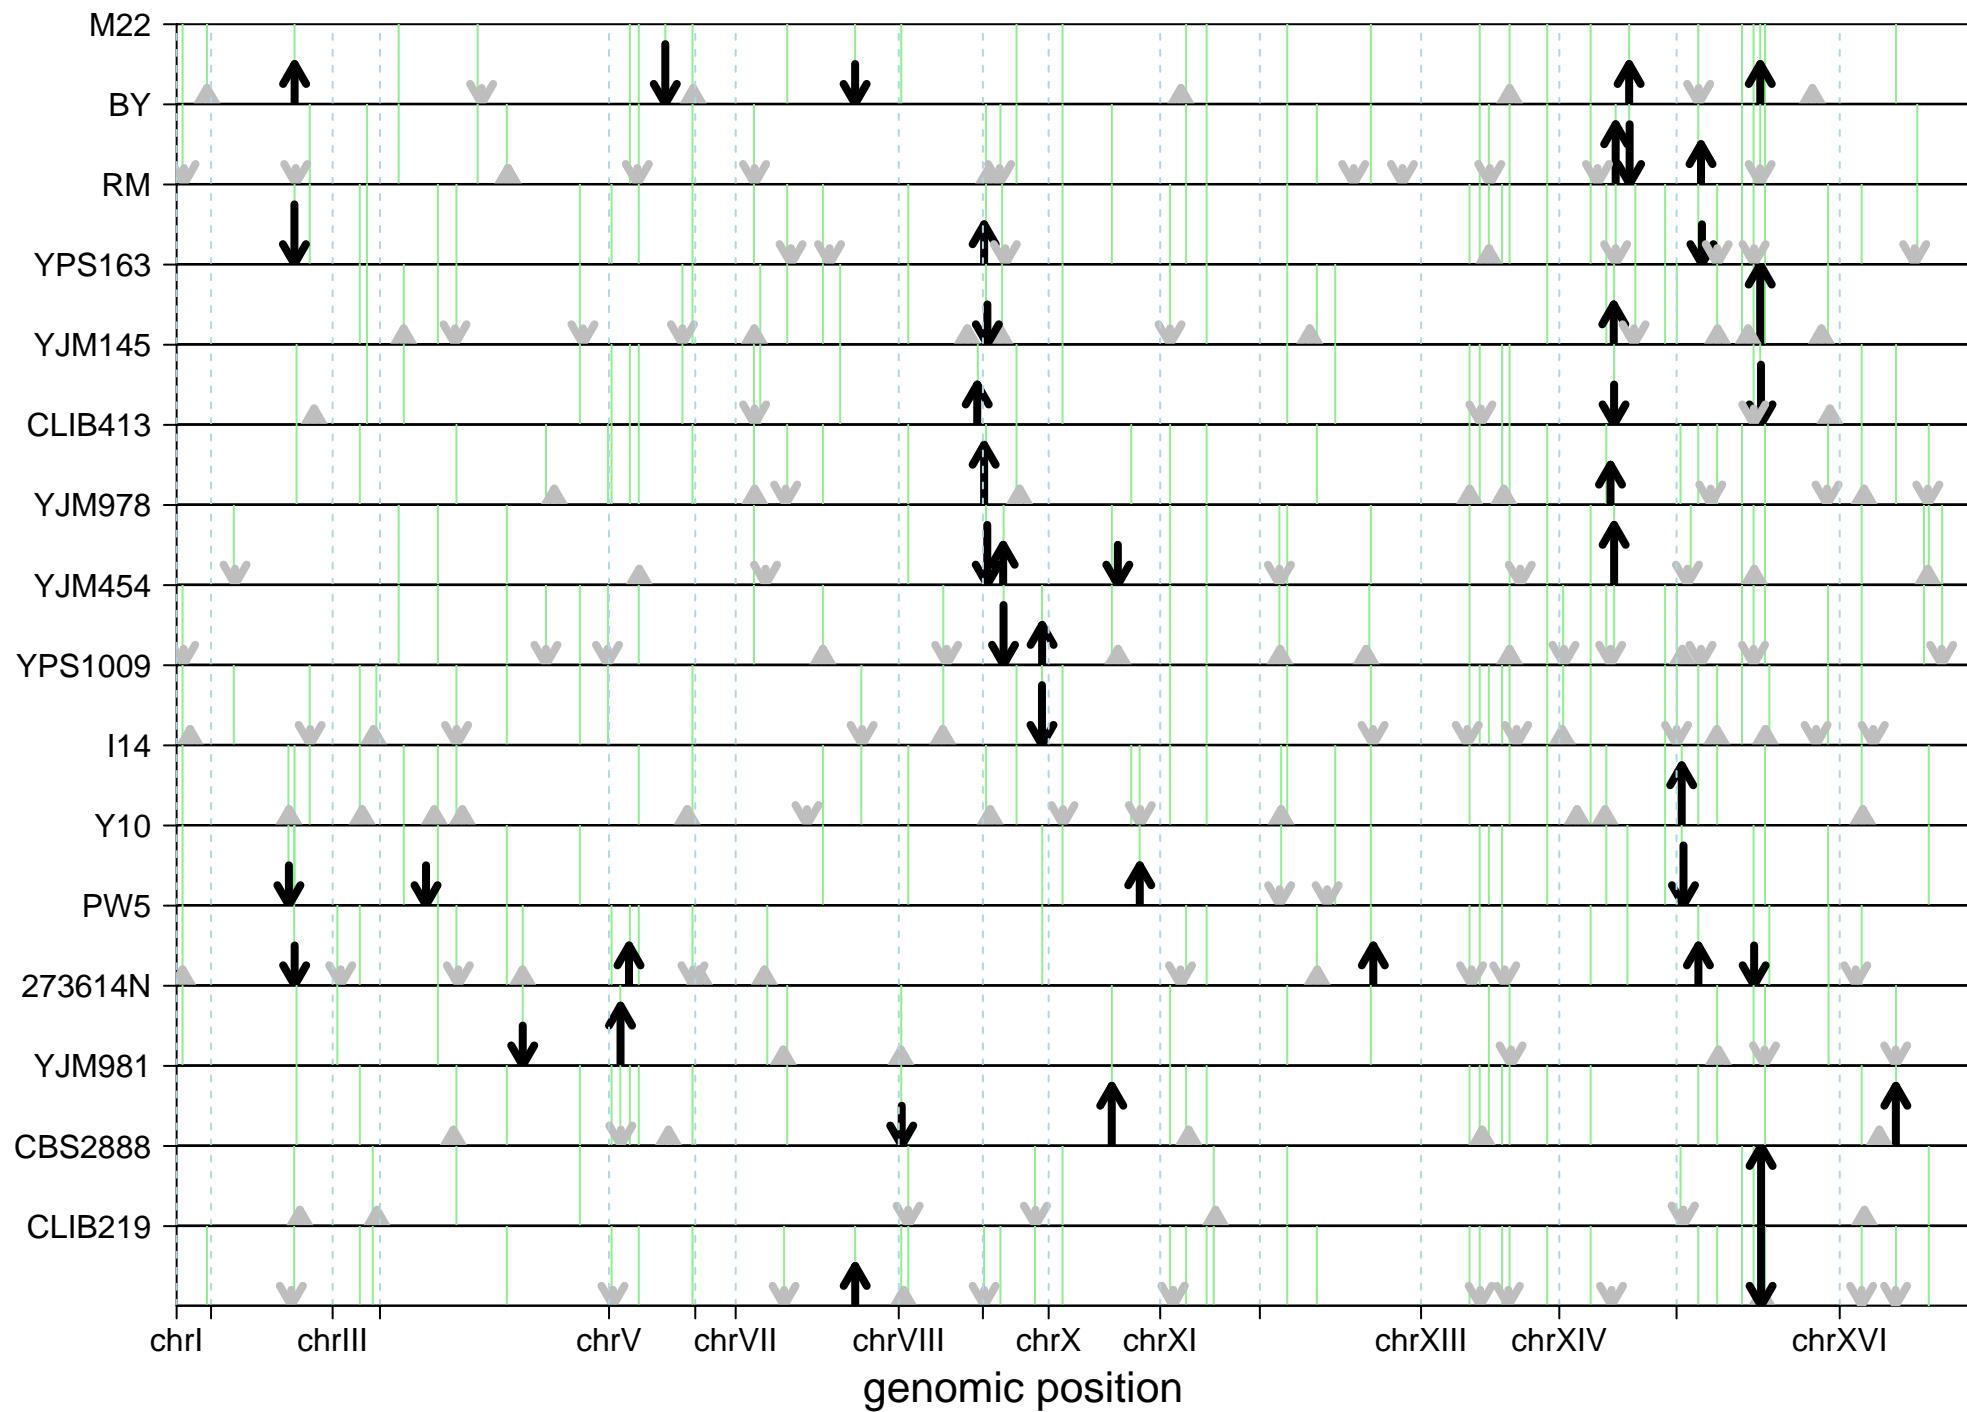

**YPD 15C    147 total QTL    |    77 joint QTL**

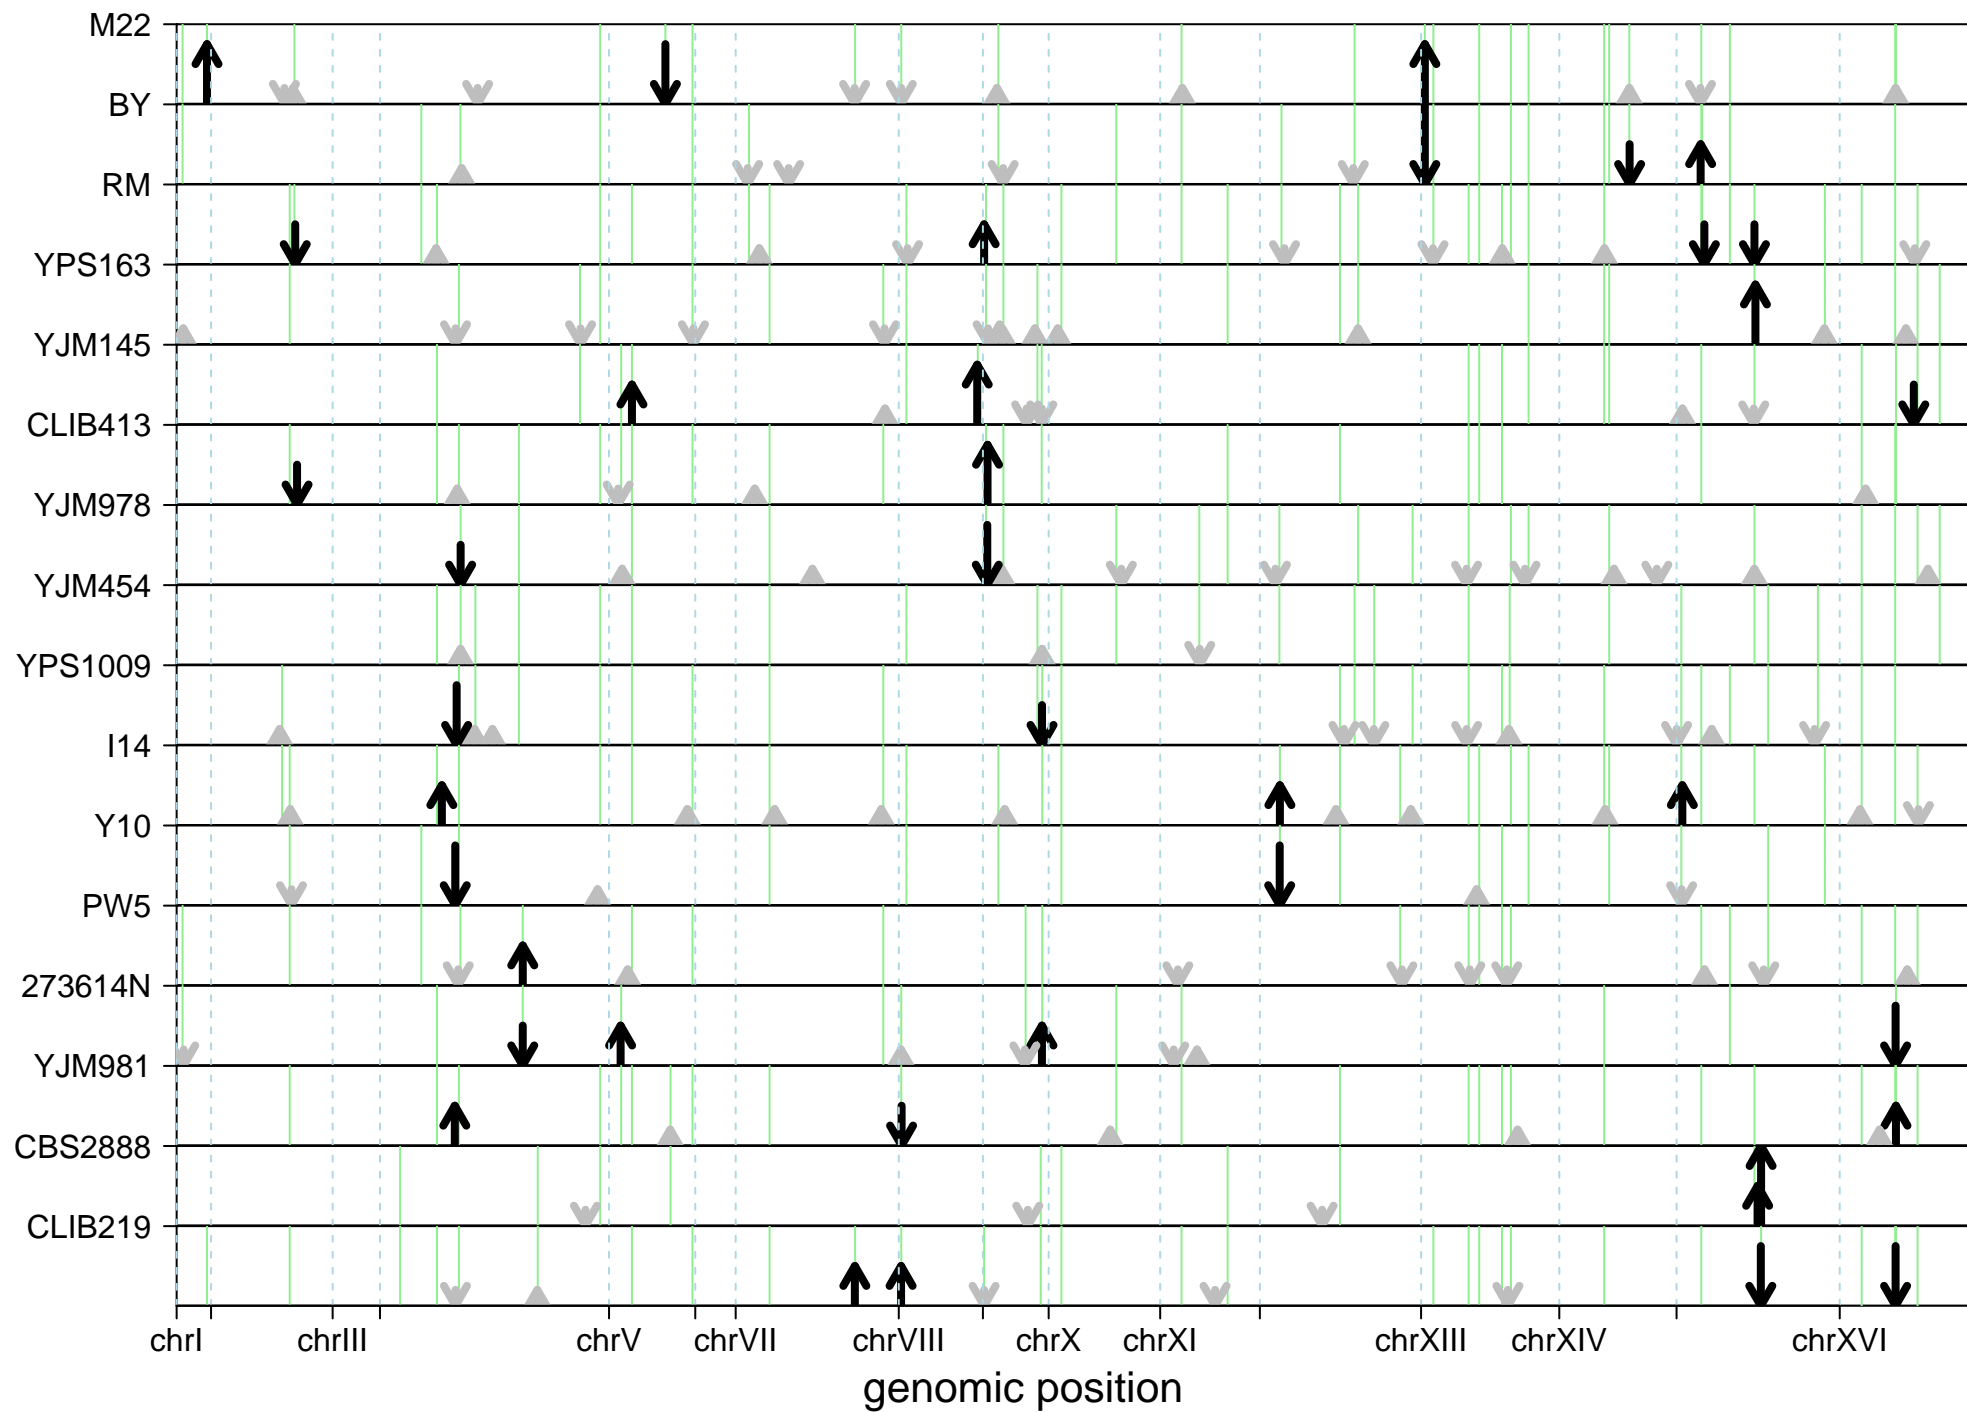

YPD 37C    164 total QTL    |    99 joint QTL

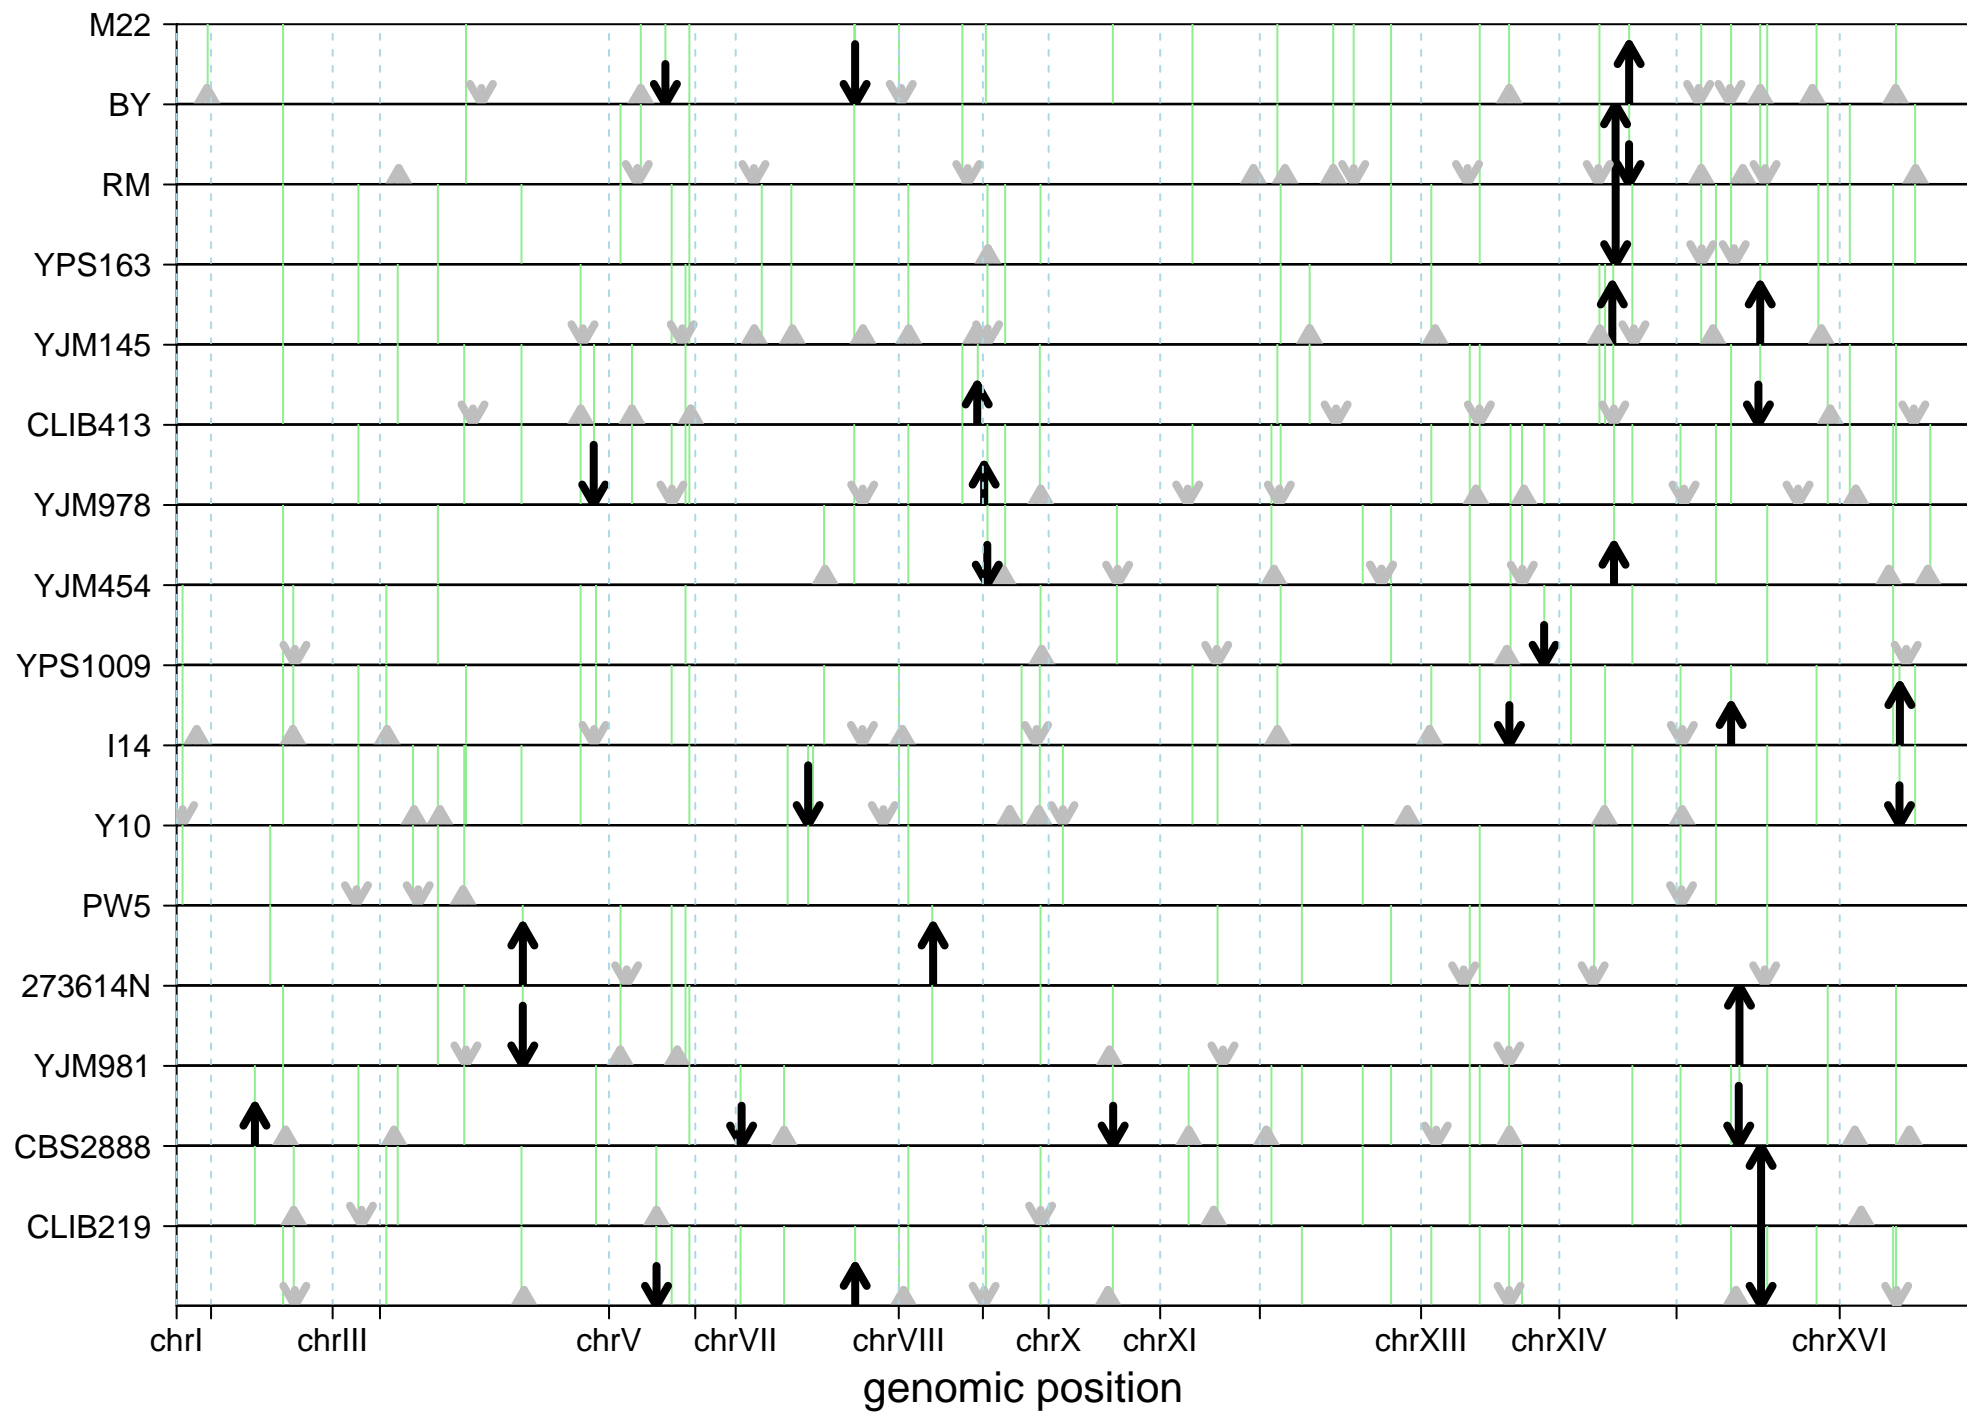

Zeocin 240 total QTL | 131 joint QTL

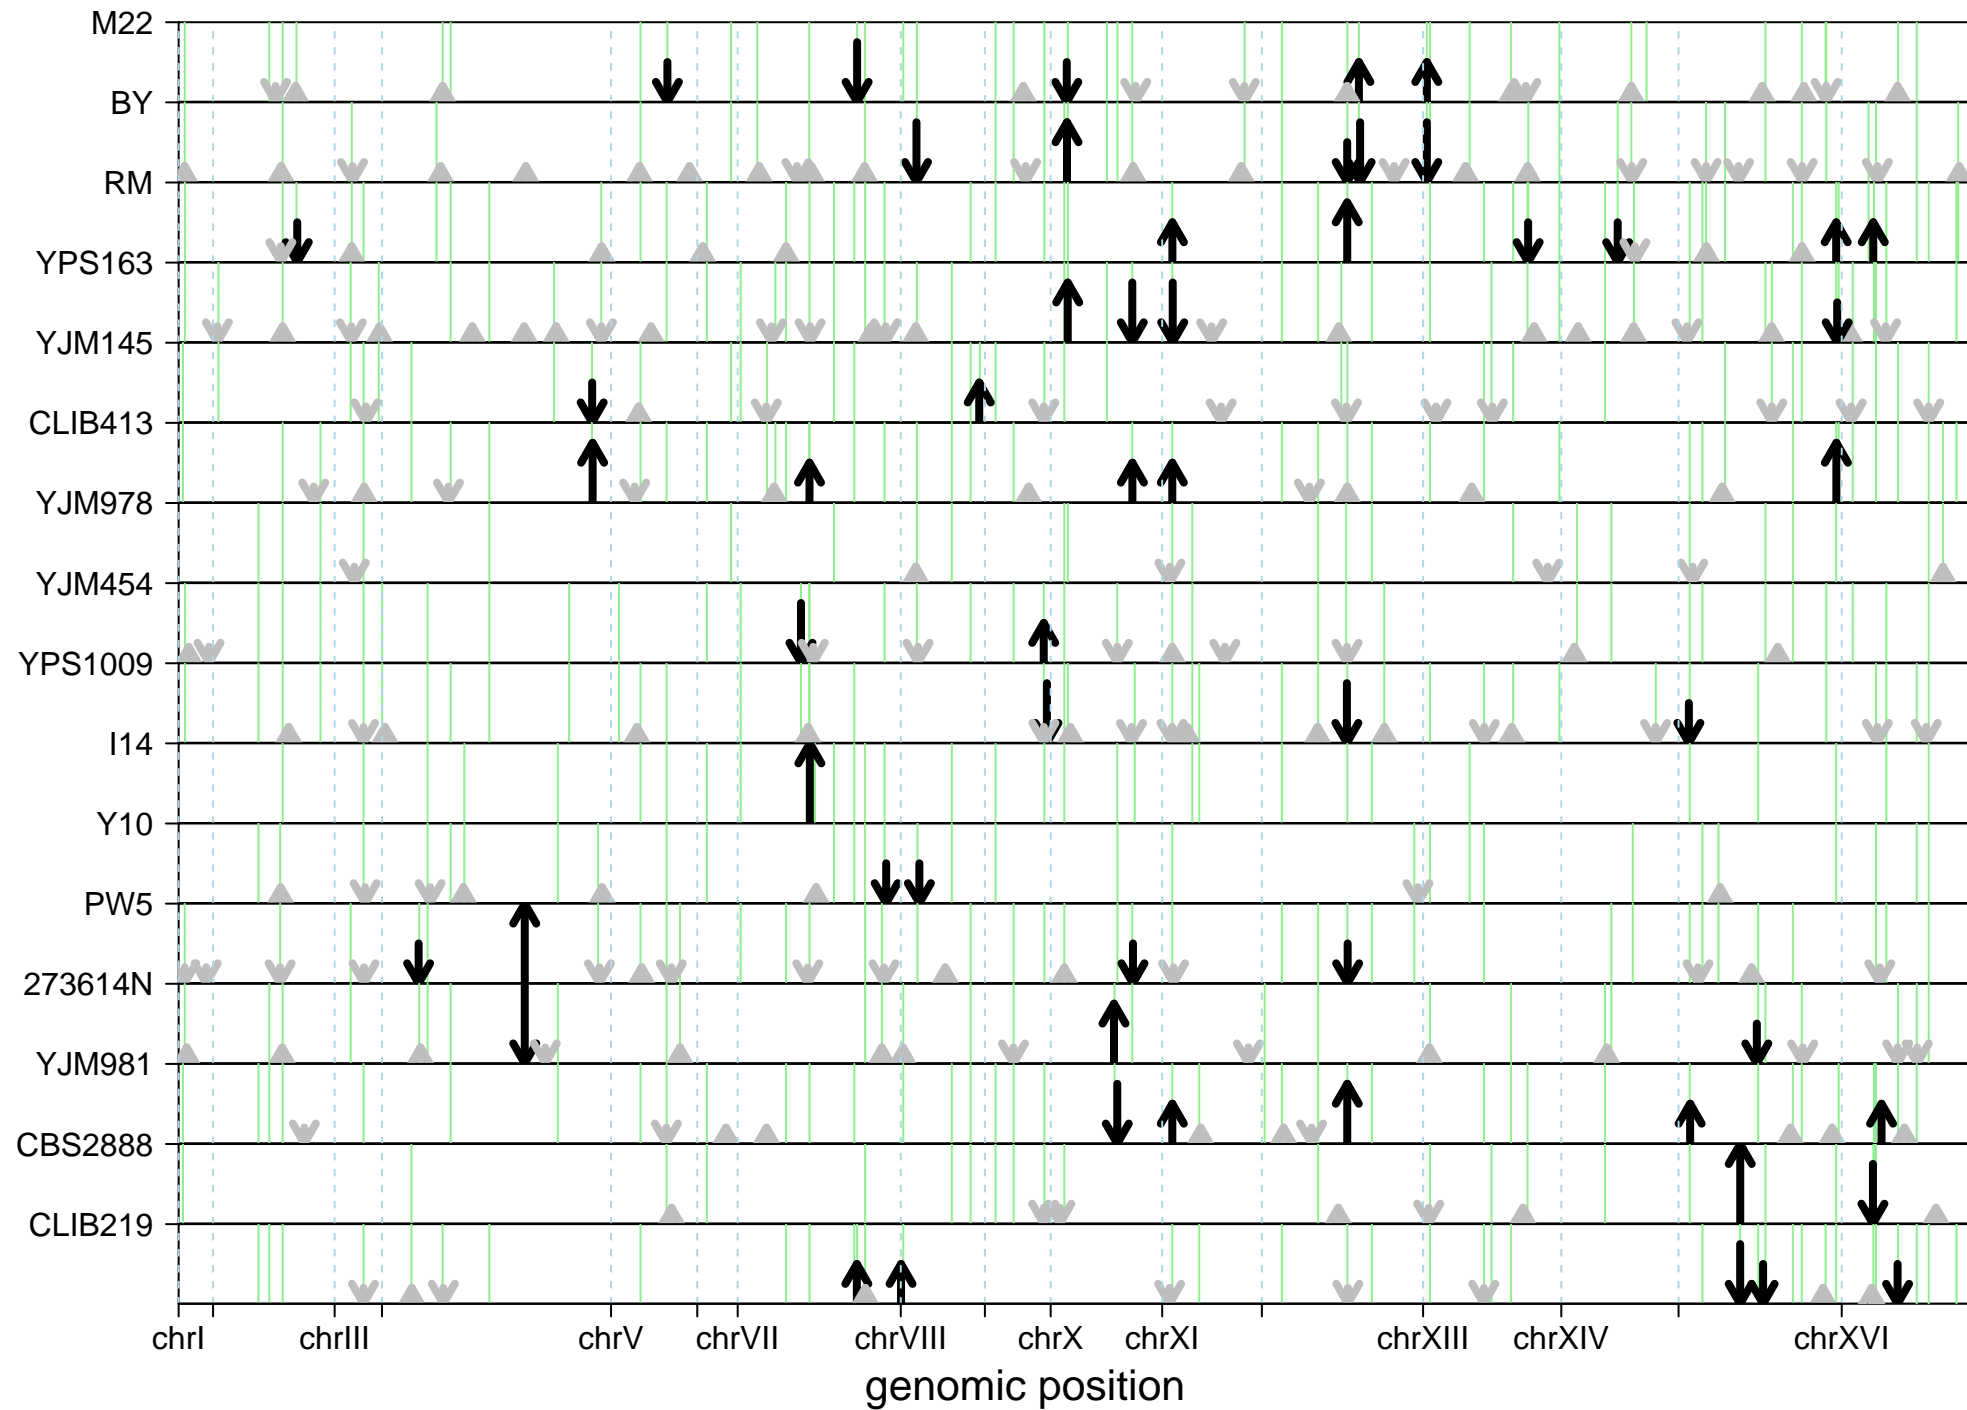

Supplement: supp [file elife_poa_e49212_Supplementary_file_3.pdf › elife_poa_e49212_Supplementary_file_3.pdf]
