# Supplementary material for: Rare variants contribute disproportionately to quantitative trait variation in yeast
Source: eLife. 2019 Oct 24;8:e49212. doi: 10.7554/eLife.49212 (PMC6892613; doi:10.7554/eLife.49212)
Supplement: Figure 2—source data 1. — Results from within-cross variance components models and total variance explained by the QTL models are listed. [file elife-49212-fig2-data1.xls]

## Sheet: Additive QTL Model
trait	cross	within_cross_variance_explained_by_qtl (cross_validated)	joint_variance_explained_by_qtl (cross_validated)	additive_heritability (whole genome)	additive_heritability_standard_error	residual_error	residual_error_standard_error
6-azauracil;50ug/mL;3	375	0.367147	0.378128	0.53436	0.0766616	0.46564	0.0296649
Cadmium_Chloride;75uM;2	375	0.673322	0.665825	0.869332	0.0854297	0.130668	0.012193
Caffeine;15mM;2	375	0.676113	0.71093	0.876918	0.0851534	0.123082	0.0117425
Cobalt_Chloride;2mM;2	375	0.499883	0.521844	0.728681	0.0856176	0.271319	0.0199671
Congo_Red;75ug/mL;3	375	0.415948	0.487633	0.57577	0.0791856	0.42423	0.0276728
Copper_Sulfate;;1	375	0.506293	0.496596	0.627086	0.0818988	0.372914	0.0251511
Diamide;1.5mM;3	375	0.436747	0.44873	0.557703	0.0781384	0.442297	0.0285451
EGTA;5mM;3	375	0.37685	0.397182	0.54804	0.0775013	0.45196	0.0290129
EtOH;;1	375	0.458091	0.448793	0.663966	0.0835014	0.336034	0.0233025
EtOH_Glucose;;1	375	0.355877	0.378455	0.548124	0.0775397	0.451876	0.0290063
Fluconazole;100uM;2	375	0.527249	0.541274	0.678575	0.0840481	0.321425	0.0225611
Formamide;2%;2	375	0.353441	0.394669	0.494865	0.0740659	0.505135	0.0315252
Fructose;;1	375	0.352463	0.434841	0.530141	0.0763814	0.469859	0.0298663
Galactose;;1	375	0.604894	0.648773	0.795905	0.0865277	0.204095	0.0163622
Glycerol;;1	375	0.372898	0.367118	0.536169	0.07679	0.463831	0.0295776
Lactate;;1	375	0.308634	0.371734	0.587157	0.0797844	0.412843	0.0271218
Lithium_Chloride;100mM;2	375	0.704181	0.729868	0.807309	0.0865037	0.192691	0.0157345
Magnesium_Chloride;;1	375	0.314617	0.392282	0.540357	0.0770528	0.459643	0.029378
Maltose;;1	375	0.639209	0.640807	0.780933	0.0864928	0.219067	0.0171773
Manganese_Sulfate;;1	375	0.404207	0.482172	0.597917	0.0804237	0.402083	0.0265913
Mannose;;1	375	0.334604	0.387393	0.538615	0.0769539	0.461385	0.0294603
Methotrexate;0.4mM;2	375	0.296417	0.364514	0.462818	0.0717208	0.537182	0.0330157
Neomycin;5mg/mL;2	375	0.395576	0.415694	0.579646	0.0794167	0.420354	0.0274837
Paraquat;0.75mM;3	375	0.458181	0.480068	0.7406	0.0858922	0.2594	0.0193389
Raffinose;;1	375	0.464506	0.497202	0.637393	0.082343	0.362607	0.0246402
SDS;0.075%;3	375	0.534289	0.536191	0.755144	0.0860947	0.244856	0.0185713
Sorbitol;1.5M;2	375	0.44849	0.49803	0.619127	0.0815115	0.380873	0.0255462
Sucrose;;1	375	0.424633	0.472041	0.614425	0.0812591	0.385575	0.0257801
Trehalose;;1	375	0.372855	0.358108	0.538549	0.0769457	0.461451	0.0294638
Tunicamycin;3uM;3	375	0.492536	0.571077	0.784931	0.0864867	0.215069	0.0169622
Xylose;;1	375	0.314661	0.334533	0.523734	0.0759427	0.476266	0.0301721
YNB;;1	375	0.733624	0.73194	0.819526	0.0864774	0.180474	0.0150512
YNB;ph3;1	375	0.0894541	0.105243	0.125256	0.0376205	0.874744	0.0471975
YNB;ph8;1	375	0.161288	0.178368	0.305298	0.0581136	0.694702	0.0400136
YPD;;1	375	0.3511	0.406801	0.548475	0.0775692	0.451525	0.0289888
YPD;15;1	375	0.33922	0.400401	0.607888	0.0808907	0.392112	0.0261054
YPD;37;1	375	0.380983	0.450555	0.625047	0.0817526	0.374953	0.0252561
Zeocin;25ug/mL;3	375	0.474687	0.511249	0.726054	0.085518	0.273946	0.0201073
6-azauracil;50ug/mL;3	A	0.34699	0.400849	0.58301	0.0783187	0.41699	0.0251419
Cadmium_Chloride;75uM;2	A	0.852035	0.852659	0.946281	0.0785801	0.0537188	0.00617065
Caffeine;15mM;2	A	0.728507	0.761028	0.881754	0.0840966	0.118246	0.00999981
Cobalt_Chloride;2mM;2	A	0.527933	0.592502	0.690809	0.0834462	0.309191	0.0199597
Congo_Red;75ug/mL;3	A	0.465618	0.478539	0.62686	0.0806751	0.37314	0.0230631
Copper_Sulfate;;1	A	0.500862	0.51039	0.655751	0.0820521	0.344249	0.0216708
Diamide;1.5mM;3	A	0.405951	0.391708	0.585042	0.0784438	0.414958	0.0250459
EGTA;5mM;3	A	0.508168	0.53831	0.756631	0.0852469	0.243369	0.0166656
EtOH;;1	A	0.586354	0.635219	0.736998	0.0848505	0.263002	0.0176593
EtOH_Glucose;;1	A	0.40654	0.4321	0.603732	0.0794699	0.396268	0.0241646
Fluconazole;100uM;2	A	0.44795	0.495629	0.598218	0.0791753	0.401782	0.0244252
Formamide;2%;2	A	0.195908	0.211197	0.375203	0.0628993	0.624797	0.0345223
Fructose;;1	A	0.45465	0.477697	0.649187	0.0817427	0.350813	0.0219894
Galactose;;1	A	0.372528	0.403603	0.586576	0.0785184	0.413424	0.0249746
Glycerol;;1	A	0.422092	0.481608	0.581422	0.0782299	0.418578	0.0252163
Lactate;;1	A	0.532911	0.580939	0.703962	0.0839118	0.296038	0.0193094
Lithium_Chloride;100mM;2	A	0.748254	0.785599	0.888798	0.0837302	0.111202	0.00960174
Magnesium_Chloride;;1	A	0.499149	0.55619	0.682018	0.0831286	0.317982	0.020391
Maltose;;1	A	0.582692	0.608732	0.74119	0.0849162	0.25881	0.0174497
Manganese_Sulfate;;1	A	0.693976	0.698303	0.743611	0.0850022	0.256389	0.0173255
Mannose;;1	A	0.419353	0.489076	0.638232	0.0812459	0.361768	0.0225165
Methotrexate;0.4mM;2	A	0.421492	0.43705	0.585824	0.0784873	0.414176	0.0250092
Neomycin;5mg/mL;2	A	0.48437	0.521304	0.692575	0.0835197	0.307425	0.0198721
Paraquat;0.75mM;3	A	0.602987	0.635576	0.80632	0.085695	0.19368	0.0140952
Raffinose;;1	A	0.492596	0.552485	0.690876	0.0834548	0.309124	0.019956
SDS;0.075%;3	A	0.475604	0.493007	0.666963	0.0825069	0.333037	0.0211278
Sorbitol;1.5M;2	A	0.395402	0.43971	0.511779	0.0737567	0.488221	0.0284446
Sucrose;;1	A	0.481799	0.500152	0.655104	0.0820127	0.344896	0.0217028
Trehalose;;1	A	0.433449	0.444012	0.567045	0.077352	0.432955	0.0258913
Tunicamycin;3uM;3	A	0.438713	0.532912	0.763968	0.0853684	0.236032	0.0162911
Xylose;;1	A	0.403637	0.423424	0.536872	0.0754674	0.463128	0.0272909
YNB;;1	A	0.207489	0.238038	0.400071	0.0650957	0.599929	0.033439
YNB;ph3;1	A	0.288005	0.337012	0.456153	0.0696841	0.543847	0.0309582
YNB;ph8;1	A	0.286405	0.248786	0.354884	0.061053	0.645116	0.035398
YPD;;1	A	0.395598	0.434554	0.608396	0.0797378	0.391604	0.0239422
YPD;15;1	A	0.476484	0.467525	0.61935	0.0803016	0.38065	0.0234215
YPD;37;1	A	0.750938	0.723044	0.835647	0.0854712	0.164353	0.0125356
Zeocin;25ug/mL;3	A	0.668393	0.702757	0.822379	0.0856105	0.177621	0.0132464
6-azauracil;50ug/mL;3	376	0.243139	0.272748	0.453681	0.0771893	0.546319	0.0387257
Cadmium_Chloride;75uM;2	376	0.394791	0.435807	0.635118	0.0886234	0.364882	0.0291516
Caffeine;15mM;2	376	0.364049	0.472712	0.612426	0.0875325	0.387574	0.0304013
Cobalt_Chloride;2mM;2	376	0.106196	0.295859	0.55609	0.0843214	0.44391	0.0334423
Congo_Red;75ug/mL;3	376	0.218234	0.24424	0.338513	0.0670754	0.661487	0.044326
Copper_Sulfate;;1	376	0.773714	0.774558	0.89102	0.0906996	0.10898	0.0135439
Diamide;1.5mM;3	376	0.305508	0.320055	0.494588	0.080272	0.505412	0.0366479
EGTA;5mM;3	376	0.357618	0.407443	0.581533	0.0858705	0.418467	0.0320782
EtOH;;1	376	0.433323	0.514773	0.67348	0.0902689	0.32652	0.0269961
EtOH_Glucose;;1	376	0.337367	0.416724	0.550302	0.0839929	0.449698	0.0337462
Fluconazole;100uM;2	376	0.229889	0.294211	0.578376	0.0856278	0.421624	0.0322537
Formamide;2%;2	376	0.151881	0.20523	0.35149	0.0683132	0.64851	0.0437146
Fructose;;1	376	0.383164	0.44854	0.589602	0.0863258	0.410398	0.0316426
Galactose;;1	376	0.154465	0.248748	0.423875	0.0748052	0.576125	0.0402077
Glycerol;;1	376	0.268274	0.342963	0.48673	0.0797086	0.51327	0.0370499
Lactate;;1	376	0.406755	0.453568	0.64583	0.089132	0.35417	0.0285531
Lithium_Chloride;100mM;2	376	0.553695	0.601515	0.859973	0.0919786	0.140027	0.0156451
Magnesium_Chloride;;1	376	0.371251	0.476566	0.604665	0.0871413	0.395335	0.0308244
Maltose;;1	376	0.647371	0.672918	0.902654	0.0900293	0.0973456	0.0127307
Manganese_Sulfate;;1	376	0.590603	0.639446	0.769121	0.092668	0.230879	0.021391
Mannose;;1	376	0.302363	0.377961	0.583862	0.0859905	0.416138	0.0319539
Methotrexate;0.4mM;2	376	0.173846	0.238584	0.387256	0.0716269	0.612744	0.0420001
Neomycin;5mg/mL;2	376	0.390042	0.426043	0.624724	0.0881341	0.375276	0.0297263
Paraquat;0.75mM;3	376	0.660022	0.693809	0.861072	0.0919587	0.138928	0.0155709
Raffinose;;1	376	0.547669	0.568829	0.745147	0.0923198	0.254853	0.0228313
SDS;0.075%;3	376	0.272588	0.369978	0.598611	0.0868075	0.401389	0.0311552
Sorbitol;1.5M;2	376	0.405401	0.483854	0.595753	0.0866719	0.404247	0.0313086
Sucrose;;1	376	0.407407	0.454534	0.523073	0.0822347	0.476927	0.0351758
Trehalose;;1	376	0.0984025	0.14908	0.194126	0.0513199	0.805874	0.0507618
Tunicamycin;3uM;3	376	0.445065	0.534033	0.735826	0.0921311	0.264174	0.0233847
Xylose;;1	376	0.112248	0.168991	0.242831	0.0570799	0.757169	0.0486706
YNB;;1	376	0.0482139	0.119561	0.285129	0.0616949	0.714871	0.0467866
YNB;ph3;1	376	0.0766108	0.0970403	0.179493	0.049526	0.820507	0.0513675
YNB;ph8;1	376	0.231748	0.282369	0.403426	0.0730444	0.596574	0.0412144
YPD;;1	376	0.314255	0.380101	0.53081	0.0827443	0.46919	0.034772
YPD;15;1	376	0.295088	0.306363	0.511716	0.0814545	0.488284	0.0357668
YPD;37;1	376	0.667197	0.646597	0.766173	0.0926299	0.233827	0.0215701
Zeocin;25ug/mL;3	376	0.444866	0.448439	0.69164	0.0908403	0.30836	0.025966
6-azauracil;50ug/mL;3	B	0.298423	0.352122	0.538778	0.0761488	0.461222	0.0266599
Cadmium_Chloride;75uM;2	B	0.500007	0.507433	0.649855	0.0821178	0.350145	0.021314
Caffeine;15mM;2	B	0.355062	0.388031	0.5133	0.074431	0.4867	0.0278541
Cobalt_Chloride;2mM;2	B	0.680624	0.695603	0.829018	0.0850081	0.170982	0.0120494
Congo_Red;75ug/mL;3	B	0.47835	0.529716	0.626355	0.0810519	0.373645	0.0224666
Copper_Sulfate;;1	B	0.91162	0.914977	0.959322	0.0728419	0.0406777	0.00413275
Diamide;1.5mM;3	B	0.557749	0.581034	0.661703	0.0825952	0.338297	0.0207291
EGTA;5mM;3	B	0.474977	0.486522	0.633335	0.0813798	0.366665	0.0221255
EtOH;;1	B	0.529686	0.519641	0.722321	0.0845297	0.277679	0.0176821
EtOH_Glucose;;1	B	0.533042	0.548555	0.706829	0.0841324	0.293171	0.0184694
Fluconazole;100uM;2	B	0.62871	0.633152	0.748874	0.0850458	0.251126	0.0163169
Formamide;2%;2	B	0.12784	0.183292	0.256271	0.0517322	0.743729	0.0391659
Fructose;;1	B	0.559089	0.594017	0.75758	0.0851624	0.24242	0.0158648
Galactose;;1	B	0.844984	0.855552	0.914627	0.0803373	0.085373	0.00709942
Glycerol;;1	B	0.542313	0.571045	0.684474	0.0834255	0.315526	0.0195956
Lactate;;1	B	0.508563	0.560946	0.711931	0.0842365	0.288069	0.0182129
Lithium_Chloride;100mM;2	B	0.695854	0.725792	0.803867	0.0853385	0.196133	0.0134153
Magnesium_Chloride;;1	B	0.477253	0.486109	0.712256	0.0842756	0.287744	0.0181945
Maltose;;1	B	0.740589	0.738323	0.91975	0.0797126	0.0802496	0.00678414
Manganese_Sulfate;;1	B	0.565291	0.580751	0.794518	0.0853626	0.205482	0.0139173
Mannose;;1	B	0.516541	0.537684	0.718746	0.0844283	0.281254	0.0178653
Methotrexate;0.4mM;2	B	0.616563	0.620514	0.765396	0.0852657	0.234604	0.0154556
Neomycin;5mg/mL;2	B	0.407503	0.473893	0.693972	0.0837013	0.306028	0.0191212
Paraquat;0.75mM;3	B	0.736644	0.70978	0.897027	0.0819199	0.102973	0.00817108
Raffinose;;1	B	0.674876	0.689945	0.864667	0.0838854	0.135333	0.0100567
SDS;0.075%;3	B	0.30097	0.335997	0.524929	0.0752727	0.475071	0.0273074
Sorbitol;1.5M;2	B	0.284693	0.396071	0.450678	0.0699211	0.549322	0.0307256
Sucrose;;1	B	0.597819	0.642649	0.712438	0.0842894	0.287562	0.0181847
Trehalose;;1	B	0.288604	0.3107	0.424551	0.0678347	0.575449	0.0319034
Tunicamycin;3uM;3	B	0.582192	0.609526	0.782862	0.0853772	0.217138	0.0145359
Xylose;;1	B	0.314934	0.345174	0.452893	0.0701004	0.547107	0.0306247
YNB;;1	B	0.149421	0.150134	0.255593	0.0516947	0.744407	0.0391908
YNB;ph3;1	B	0.00167143	0.0513269	0.13533	0.0370569	0.86467	0.043936
YNB;ph8;1	B	0.23648	0.238999	0.280371	0.0543186	0.719629	0.0381643
YPD;;1	B	0.471735	0.500685	0.649873	0.0821142	0.350127	0.0213134
YPD;15;1	B	0.216955	0.254403	0.416914	0.0672061	0.583086	0.032245
YPD;37;1	B	0.44439	0.472434	0.63241	0.081337	0.36759	0.0221708
Zeocin;25ug/mL;3	B	0.564246	0.63797	0.806625	0.0853165	0.193375	0.013267
6-azauracil;50ug/mL;3	377	0.275696	0.289062	0.439756	0.0715745	0.560244	0.0353032
Cadmium_Chloride;75uM;2	377	0.388083	0.416536	0.645324	0.0841792	0.354676	0.025358
Caffeine;15mM;2	377	0.325527	0.41862	0.541804	0.078686	0.458196	0.0305066
Cobalt_Chloride;2mM;2	377	0.112958	0.192607	0.392157	0.0676035	0.607843	0.0374629
Congo_Red;75ug/mL;3	377	0.352381	0.388173	0.585109	0.0812409	0.414891	0.0283875
Copper_Sulfate;;1	377	0.321878	0.341458	0.500754	0.0759879	0.499246	0.0324698
Diamide;1.5mM;3	377	0.302331	0.290887	0.417749	0.0697483	0.582251	0.0363112
EGTA;5mM;3	377	0.423871	0.467286	0.607612	0.0824334	0.392388	0.0272665
EtOH;;1	377	0.302952	0.313356	0.502675	0.0761064	0.497325	0.0323799
EtOH_Glucose;;1	377	0.359009	0.377981	0.472237	0.074016	0.527763	0.0338041
Fluconazole;100uM;2	377	0.612594	0.599487	0.767351	0.0874	0.232649	0.0188663
Formamide;2%;2	377	0.0548485	0.0676184	0.194685	0.0474314	0.805315	0.0457864
Fructose;;1	377	0.305259	0.32341	0.496389	0.0758143	0.503611	0.0326656
Galactose;;1	377	0.47024	0.470349	0.582244	0.0811052	0.417756	0.0285274
Glycerol;;1	377	0.202712	0.278707	0.445043	0.0719696	0.554957	0.035062
Lactate;;1	377	0.202266	0.263033	0.468108	0.0737313	0.531892	0.0339947
Lithium_Chloride;100mM;2	377	0.501015	0.542761	0.697768	0.0860285	0.302232	0.0226353
Magnesium_Chloride;;1	377	0.279816	0.252996	0.391063	0.0675001	0.608937	0.0375126
Maltose;;1	377	0.478355	0.513151	0.723346	0.08671	0.276654	0.021271
Manganese_Sulfate;;1	377	0.295106	0.260947	0.406187	0.0688324	0.593813	0.0368301
Mannose;;1	377	0.271883	0.315457	0.431525	0.0708796	0.568475	0.0356833
Methotrexate;0.4mM;2	377	0.420214	0.42466	0.58454	0.0812142	0.41546	0.0284153
Neomycin;5mg/mL;2	377	0.522636	0.530649	0.663353	0.0849021	0.336647	0.0244309
Paraquat;0.75mM;3	377	0.564992	0.567227	0.689905	0.085818	0.310095	0.0230474
Raffinose;;1	377	0.407952	0.43988	0.544689	0.0789133	0.455311	0.0303632
SDS;0.075%;3	377	0.134724	0.210269	0.412761	0.0693905	0.587239	0.0365325
Sorbitol;1.5M;2	377	0.246361	0.324438	0.537886	0.0784384	0.462114	0.030696
Sucrose;;1	377	0.332313	0.328805	0.446952	0.0721304	0.553048	0.0349732
Trehalose;;1	377	0.207631	0.2264	0.378641	0.0664219	0.621359	0.0380655
Tunicamycin;3uM;3	377	0.361589	0.398024	0.751783	0.0871833	0.248217	0.0197296
Xylose;;1	377	0.162026	0.15543	0.301831	0.0591641	0.698169	0.0414048
YNB;;1	377	0.103006	0.160386	0.330788	0.0620368	0.669212	0.040161
YNB;ph3;1	377	0.214475	0.19098	0.296125	0.058592	0.703875	0.0416464
YNB;ph8;1	377	0.183534	0.196781	0.248615	0.0535671	0.751385	0.0436274
YPD;;1	377	0.281459	0.31485	0.442665	0.0717711	0.557335	0.0351723
YPD;15;1	377	0.245135	0.238558	0.347666	0.063615	0.652334	0.0394292
YPD;37;1	377	0.205414	0.205115	0.327595	0.0616964	0.672405	0.0403019
Zeocin;25ug/mL;3	377	0.195855	0.245815	0.451192	0.0724573	0.548808	0.0347779
6-azauracil;50ug/mL;3	393	0.215862	0.249156	0.330563	0.0621183	0.669437	0.038589
Cadmium_Chloride;75uM;2	393	0.737243	0.749842	0.843902	0.0888409	0.156098	0.0132117
Caffeine;15mM;2	393	0.365415	0.370852	0.580673	0.0820401	0.419327	0.0270055
Cobalt_Chloride;2mM;2	393	0.423439	0.50262	0.755542	0.0889402	0.244458	0.0180859
Congo_Red;75ug/mL;3	393	0.173941	0.229649	0.307224	0.0597071	0.692776	0.0396051
Copper_Sulfate;;1	393	0.811352	0.828914	0.916479	0.0851707	0.0835212	0.00888632
Diamide;1.5mM;3	393	0.128251	0.213009	0.286684	0.0575727	0.713316	0.0404835
EGTA;5mM;3	393	0.376148	0.400839	0.524783	0.0784912	0.475217	0.0297051
EtOH;;1	393	0.306591	0.380964	0.492565	0.0762362	0.507435	0.0312294
EtOH_Glucose;;1	393	0.303988	0.333405	0.407359	0.0693462	0.592641	0.0351671
Fluconazole;100uM;2	393	0.594077	0.588919	0.814863	0.0892535	0.185137	0.0148509
Formamide;2%;2	393	0.398102	0.419059	0.536668	0.0792912	0.463332	0.0291365
Fructose;;1	393	0.421714	0.452317	0.598565	0.0830306	0.401435	0.0261289
Galactose;;1	393	0.677875	0.70279	0.824373	0.0891245	0.175627	0.0143211
Glycerol;;1	393	0.321972	0.356326	0.476651	0.0750002	0.523349	0.0319787
Lactate;;1	393	0.256686	0.31847	0.488681	0.0759247	0.511319	0.0314137
Lithium_Chloride;100mM;2	393	0.68271	0.693838	0.815338	0.089251	0.184662	0.0148243
Magnesium_Chloride;;1	393	0.387727	0.430771	0.562929	0.0809623	0.437071	0.0278705
Maltose;;1	393	0.149932	0.223694	0.305223	0.0595084	0.694777	0.0396906
Manganese_Sulfate;;1	393	0.541885	0.561846	0.734267	0.0885033	0.265733	0.0192167
Mannose;;1	393	0.305224	0.310062	0.476852	0.0750783	0.523148	0.0319648
Methotrexate;0.4mM;2	393	0.260676	0.333336	0.530256	0.0788587	0.469744	0.0294439
Neomycin;5mg/mL;2	393	0.618261	0.658905	0.793448	0.0893105	0.206552	0.0160341
Paraquat;0.75mM;3	393	0.597226	0.639216	0.828314	0.0891059	0.171686	0.0140975
Raffinose;;1	393	0.322171	0.37776	0.54856	0.0800497	0.45144	0.0285659
SDS;0.075%;3	393	0.262146	0.331621	0.465795	0.0741724	0.534205	0.0324842
Sorbitol;1.5M;2	393	0.178505	0.234576	0.380821	0.0669019	0.619179	0.0363679
Sucrose;;1	393	0.287213	0.286237	0.387846	0.0675841	0.612154	0.0360496
Trehalose;;1	393	0.0978057	0.135834	0.191122	0.0464852	0.808878	0.0444328
Tunicamycin;3uM;3	393	0.462095	0.488036	0.704337	0.0877326	0.295663	0.0207797
Xylose;;1	393	0.0441222	0.0943345	0.146841	0.0406947	0.853159	0.046162
YNB;;1	393	0.0611712	0.156772	0.33638	0.062683	0.66362	0.0383356
YNB;ph3;1	393	NaN	0.0207099	0.0581238	0.0274853	0.941876	0.0493158
YNB;ph8;1	393	0.0675195	0.0931251	0.17514	0.0444446	0.82486	0.0450659
YPD;;1	393	0.30393	0.332485	0.457811	0.0735345	0.542189	0.0328556
YPD;15;1	393	0.195299	0.184435	0.241566	0.0525595	0.758434	0.0423804
YPD;37;1	393	0.268762	0.311324	0.405356	0.0691152	0.594644	0.035262
Zeocin;25ug/mL;3	393	0.438699	0.468419	0.69113	0.0872696	0.30887	0.0214641
6-azauracil;50ug/mL;3	381	0.309773	0.352336	0.525951	0.0758163	0.474049	0.0281563
Cadmium_Chloride;75uM;2	381	0.88234	0.88274	0.970986	0.074467	0.029014	0.00481755
Caffeine;15mM;2	381	0.205204	0.277319	0.401743	0.0663982	0.598257	0.0336912
Cobalt_Chloride;2mM;2	381	0.530527	0.559848	0.740123	0.0856905	0.259877	0.0178803
Congo_Red;75ug/mL;3	381	0.435504	0.451792	0.609582	0.0808099	0.390418	0.0242604
Copper_Sulfate;;1	381	0.91577	0.919391	0.952782	0.0779133	0.0472181	0.00605141
Diamide;1.5mM;3	381	0.446661	0.460711	0.630313	0.0818544	0.369687	0.0232726
EGTA;5mM;3	381	0.259229	0.284315	0.643609	0.0824061	0.356391	0.0226387
EtOH;;1	381	0.446395	0.522733	0.668728	0.083521	0.331272	0.0214196
EtOH_Glucose;;1	381	0.452346	0.465252	0.643782	0.0824534	0.356218	0.0226279
Fluconazole;100uM;2	381	0.637887	0.640246	0.764736	0.0861292	0.235264	0.0166257
Formamide;2%;2	381	0.30958	0.392362	0.451768	0.0704691	0.548232	0.0314973
Fructose;;1	381	0.468482	0.465986	0.655866	0.0830093	0.344134	0.022043
Galactose;;1	381	0.438323	0.489123	0.643908	0.0824726	0.356092	0.022621
Glycerol;;1	381	0.302495	0.357679	0.490422	0.073435	0.509578	0.0297644
Lactate;;1	381	0.34093	0.383957	0.525263	0.0757733	0.474737	0.0281876
Lithium_Chloride;100mM;2	381	0.79664	0.797879	0.902925	0.0832435	0.0970752	0.00912189
Magnesium_Chloride;;1	381	0.439642	0.446286	0.601551	0.080397	0.398449	0.0246398
Maltose;;1	381	0.820334	0.832314	0.939836	0.0797159	0.0601638	0.00688471
Manganese_Sulfate;;1	381	0.67729	0.691892	0.89008	0.0840417	0.10992	0.00986803
Mannose;;1	381	0.437224	0.464302	0.639885	0.0822946	0.360115	0.0228142
Methotrexate;0.4mM;2	381	0.312948	0.360205	0.605745	0.0806205	0.394255	0.0244414
Neomycin;5mg/mL;2	381	0.655106	0.68993	0.801644	0.0863282	0.198356	0.0147098
Paraquat;0.75mM;3	381	0.721806	0.694876	0.857046	0.0854829	0.142954	0.0117271
Raffinose;;1	381	0.583918	0.582416	0.769206	0.0861451	0.230794	0.0163982
SDS;0.075%;3	381	0.192638	0.222658	0.44639	0.0701566	0.55361	0.0317279
Sorbitol;1.5M;2	381	0.229236	0.298255	0.431606	0.0688973	0.568394	0.0323855
Sucrose;;1	381	0.379589	0.433441	0.620018	0.0813237	0.379982	0.0237657
Trehalose;;1	381	0.169449	0.229177	0.331648	0.0599566	0.668352	0.0366913
Tunicamycin;3uM;3	381	0.436418	0.489296	0.638646	0.0822505	0.361354	0.0228729
Xylose;;1	381	0.209558	0.221153	0.315525	0.0583816	0.684475	0.0373661
YNB;;1	381	0.0972467	0.138712	0.261177	0.0527466	0.738823	0.0395994
YNB;ph3;1	381	0.233559	0.246887	0.410517	0.0671093	0.589483	0.033312
YNB;ph8;1	381	0.143801	0.19715	0.398109	0.0661003	0.601891	0.0338478
YPD;;1	381	0.42863	0.421489	0.61855	0.0812452	0.38145	0.0238359
YPD;15;1	381	0.23186	0.249216	0.538882	0.0766346	0.461118	0.0275649
YPD;37;1	381	0.171474	0.180567	0.424502	0.0683594	0.575498	0.0326945
Zeocin;25ug/mL;3	381	0.0682768	0.0811162	0.181492	0.0435402	0.818508	0.0427345
6-azauracil;50ug/mL;3	3008	0.287255	0.316779	0.531769	0.0812491	0.468231	0.0315537
Cadmium_Chloride;75uM;2	3008	0.513417	0.573025	0.747899	0.0911825	0.252101	0.0203043
Caffeine;15mM;2	3008	0.160316	0.187555	0.378298	0.0689626	0.621702	0.038837
Cobalt_Chloride;2mM;2	3008	0.389376	0.424446	0.558935	0.0830017	0.441065	0.0302091
Congo_Red;75ug/mL;3	3008	0.30386	0.352343	0.525474	0.0808309	0.474526	0.0318623
Copper_Sulfate;;1	3008	0.820779	0.85118	0.93125	0.0860371	0.0687498	0.00922152
Diamide;1.5mM;3	3008	0.299466	0.369375	0.560694	0.0831327	0.439306	0.0301198
EGTA;5mM;3	3008	0.197965	0.304022	0.597284	0.085299	0.402716	0.0282772
EtOH;;1	3008	0.46402	0.487681	0.672463	0.0889616	0.327537	0.0243791
EtOH_Glucose;;1	3008	0.401432	0.455547	0.659808	0.0884319	0.340192	0.0250461
Fluconazole;100uM;2	3008	0.181883	0.247727	0.524774	0.0807822	0.475226	0.0318967
Formamide;2%;2	3008	0.336121	0.365945	0.516506	0.0802104	0.483494	0.0323013
Fructose;;1	3008	0.382614	0.44342	0.624217	0.0867739	0.375783	0.0268963
Galactose;;1	3008	0.743106	0.751742	0.85122	0.0909704	0.14878	0.014349
Glycerol;;1	3008	0.1484	0.196004	0.372081	0.0683171	0.627919	0.0391261
Lactate;;1	3008	0.359756	0.419088	0.634791	0.0872844	0.365209	0.026351
Lithium_Chloride;100mM;2	3008	0.741877	0.726005	0.799385	0.0916557	0.200615	0.0174026
Magnesium_Chloride;;1	3008	0.400995	0.483244	0.664582	0.0886298	0.335418	0.0247955
Maltose;;1	3008	0.809255	0.835215	0.947548	0.0839963	0.0524525	0.00807128
Manganese_Sulfate;;1	3008	0.474183	0.497292	0.733025	0.0908363	0.266975	0.0211254
Mannose;;1	3008	0.364656	0.432424	0.601378	0.0855425	0.398622	0.0280678
Methotrexate;0.4mM;2	3008	0.330419	0.369049	0.497478	0.0788643	0.502522	0.0332256
Neomycin;5mg/mL;2	3008	0.654744	0.652673	0.781817	0.0916146	0.218183	0.018405
Paraquat;0.75mM;3	3008	0.673999	0.664212	0.885023	0.0896415	0.114977	0.0122614
Raffinose;;1	3008	0.409088	0.49662	0.675981	0.0890806	0.324019	0.0241944
SDS;0.075%;3	3008	0.0502656	0.184448	0.331008	0.0643393	0.668992	0.0409772
Sorbitol;1.5M;2	3008	0.206358	0.298689	0.431821	0.073621	0.568179	0.0363624
Sucrose;;1	3008	0.335924	0.359574	0.540411	0.0818321	0.459589	0.031127
Trehalose;;1	3008	0.217166	0.258589	0.462633	0.0762241	0.537367	0.0348983
Tunicamycin;3uM;3	3008	0.499113	0.595826	0.80412	0.0916651	0.19588	0.0171286
Xylose;;1	3008	0.144405	0.18989	0.320649	0.0632475	0.679351	0.0414412
YNB;;1	3008	0.0792465	0.11419	0.30312	0.0614151	0.69688	0.0422155
YNB;ph3;1	3008	0.0343514	0.0320109	0.08775	0.0340469	0.91225	0.0508765
YNB;ph8;1	3008	0.0882672	0.0664153	0.186463	0.0478616	0.813537	0.0471381
YPD;;1	3008	0.309726	0.374493	0.550716	0.0825136	0.449284	0.0306157
YPD;15;1	3008	0.0471531	0.0983776	0.208104	0.0505962	0.791896	0.0462564
YPD;37;1	3008	0.0769503	0.0827157	0.234903	0.0538578	0.765097	0.0451411
Zeocin;25ug/mL;3	3008	0.169843	0.269284	0.535922	0.081475	0.464078	0.0313529
6-azauracil;50ug/mL;3	2999	0.337468	0.328527	0.517726	0.0740495	0.482274	0.0294658
Cadmium_Chloride;75uM;2	2999	0.59334	0.614717	0.771784	0.0848154	0.228216	0.0172547
Caffeine;15mM;2	2999	0.676739	0.707912	0.845372	0.0845904	0.154628	0.0133531
Cobalt_Chloride;2mM;2	2999	0.503988	0.556887	0.665557	0.0819879	0.334443	0.0225532
Congo_Red;75ug/mL;3	2999	0.105249	0.247935	0.366464	0.062325	0.633536	0.0360775
Copper_Sulfate;;1	2999	0.843649	0.865251	0.934483	0.079828	0.0655169	0.0081814
Diamide;1.5mM;3	2999	0.154286	0.276188	0.388726	0.0642605	0.611274	0.0351332
EGTA;5mM;3	2999	0.420933	0.465547	0.606514	0.0792943	0.393486	0.0253706
EtOH;;1	2999	0.0911161	0.193828	0.323594	0.0583954	0.676406	0.0378663
EtOH_Glucose;;1	2999	0.370432	0.385612	0.523198	0.0744161	0.476802	0.0292176
Fluconazole;100uM;2	2999	0.378986	0.463809	0.670357	0.0821648	0.329643	0.0223212
Formamide;2%;2	2999	0.311066	0.322189	0.424627	0.0672301	0.575373	0.0335891
Fructose;;1	2999	0.305241	0.373356	0.517375	0.0740231	0.482625	0.0294819
Galactose;;1	2999	0.810119	0.814333	0.831016	0.0848201	0.168984	0.0141338
Glycerol;;1	2999	0.234643	0.267646	0.412687	0.0662664	0.587313	0.0341053
Lactate;;1	2999	0.134804	0.225747	0.460912	0.0700524	0.539088	0.0320015
Lithium_Chloride;100mM;2	2999	0.776704	0.804368	0.876778	0.0836757	0.123222	0.0116033
Magnesium_Chloride;;1	2999	0.208197	0.30255	0.46745	0.0705581	0.53255	0.0317114
Maltose;;1	2999	0.706221	0.73278	0.872113	0.0838294	0.127887	0.0118687
Manganese_Sulfate;;1	2999	0.634371	0.669149	0.785494	0.0849382	0.214506	0.0165449
Mannose;;1	2999	0.371948	0.406229	0.569926	0.0772779	0.430074	0.0270791
Methotrexate;0.4mM;2	2999	0.267572	0.335388	0.563388	0.0769093	0.436612	0.0273802
Neomycin;5mg/mL;2	2999	0.75101	0.77294	0.842838	0.0846293	0.157162	0.0134923
Paraquat;0.75mM;3	2999	0.686975	0.712338	0.84035	0.0846816	0.15965	0.0136275
Raffinose;;1	2999	0.238206	0.2676	0.380644	0.0635678	0.619356	0.0354771
SDS;0.075%;3	2999	0.341793	0.353583	0.55496	0.0764079	0.44504	0.0277683
Sorbitol;1.5M;2	2999	0.391338	0.412401	0.566348	0.0770859	0.433652	0.0272433
Sucrose;;1	2999	0.295847	0.356043	0.523528	0.0744344	0.476472	0.0292029
Trehalose;;1	2999	0.103044	0.118243	0.269324	0.053018	0.730676	0.0400715
Tunicamycin;3uM;3	2999	0.621535	0.651804	0.824076	0.0849062	0.175924	0.0145068
Xylose;;1	2999	0.132183	0.18761	0.351556	0.0609857	0.648444	0.0367044
YNB;;1	2999	0.0734956	0.110008	0.223266	0.0480863	0.776734	0.0418844
YNB;ph3;1	2999	0.00258652	0.0215667	0.118013	0.0353338	0.881987	0.0457651
YNB;ph8;1	2999	0.155935	0.192211	0.358208	0.061608	0.641792	0.0364236
YPD;;1	2999	0.250194	0.28795	0.439604	0.0684292	0.560396	0.0329362
YPD;15;1	2999	0.344703	0.323271	0.470904	0.0707946	0.529096	0.0315599
YPD;37;1	2999	0.235725	0.267074	0.418468	0.0667343	0.581532	0.0338558
Zeocin;25ug/mL;3	2999	0.459144	0.460604	0.649933	0.0813495	0.350067	0.0233062
6-azauracil;50ug/mL;3	3000	0.293291	0.339043	0.563297	0.0790579	0.436703	0.0277913
Cadmium_Chloride;75uM;2	3000	0.755309	0.768012	0.898859	0.0842414	0.101141	0.0102314
Caffeine;15mM;2	3000	0.618982	0.641089	0.725468	0.0861716	0.274532	0.0197969
Cobalt_Chloride;2mM;2	3000	0.315999	0.315667	0.494466	0.0745631	0.505534	0.0309965
Congo_Red;75ug/mL;3	3000	0.145271	0.188259	0.34088	0.0617477	0.65912	0.0377999
Copper_Sulfate;;1	3000	0.753781	0.754914	0.904533	0.0838571	0.0954666	0.00988591
Diamide;1.5mM;3	3000	0.327091	0.372469	0.591991	0.0807223	0.408009	0.0264227
EGTA;5mM;3	3000	0.37055	0.38642	0.562347	0.0790303	0.437653	0.0278343
EtOH;;1	3000	0.159836	0.2532	0.393653	0.0665253	0.606347	0.0355204
EtOH_Glucose;;1	3000	0.157114	0.23102	0.425	0.0691887	0.575	0.0341364
Fluconazole;100uM;2	3000	0.267038	0.327003	0.552254	0.0783878	0.447746	0.0283125
Formamide;2%;2	3000	0.180471	0.245022	0.331103	0.0607623	0.668897	0.0382198
Fructose;;1	3000	0.298753	0.350574	0.537423	0.077456	0.462577	0.0290084
Galactose;;1	3000	0.28636	0.338572	0.529913	0.0769596	0.470087	0.0293596
Glycerol;;1	3000	0.253405	0.333734	0.505497	0.0753142	0.494503	0.0304911
Lactate;;1	3000	0.164439	0.247601	0.437515	0.0702204	0.562485	0.0335774
Lithium_Chloride;100mM;2	3000	0.687619	0.741086	0.843825	0.0865575	0.156175	0.013442
Magnesium_Chloride;;1	3000	0.354447	0.402261	0.57405	0.0797016	0.42595	0.0272804
Maltose;;1	3000	0.525667	0.525266	0.699258	0.0853956	0.300742	0.0211384
Manganese_Sulfate;;1	3000	0.578992	0.604062	0.746506	0.086615	0.253494	0.0187072
Mannose;;1	3000	0.244075	0.291803	0.521966	0.0764256	0.478034	0.02973
Methotrexate;0.4mM;2	3000	0.284681	0.299265	0.514762	0.07596	0.485238	0.0300625
Neomycin;5mg/mL;2	3000	0.418504	0.408827	0.590727	0.0806586	0.409273	0.026483
Paraquat;0.75mM;3	3000	0.649462	0.629566	0.805946	0.087051	0.194054	0.0155418
Raffinose;;1	3000	0.305459	0.339761	0.569786	0.0794682	0.430214	0.027482
SDS;0.075%;3	3000	0.385914	0.40075	0.495143	0.074596	0.504857	0.0309666
Sorbitol;1.5M;2	3000	0.259472	0.366985	0.4773	0.0732927	0.5227	0.0317826
Sucrose;;1	3000	0.142691	0.247517	0.415978	0.0684452	0.584022	0.0345363
Trehalose;;1	3000	0.211576	0.263931	0.443367	0.0706815	0.556633	0.0333159
Tunicamycin;3uM;3	3000	0.617412	0.602626	0.828297	0.0868221	0.171703	0.0143134
Xylose;;1	3000	0.202393	0.244979	0.427556	0.0694198	0.572444	0.0340211
YNB;;1	3000	0.6622	0.646953	0.78255	0.087049	0.21745	0.0168036
YNB;ph3;1	3000	0.0927483	0.139982	0.217665	0.0487132	0.782335	0.042879
YNB;ph8;1	3000	0.314264	0.302123	0.473092	0.072989	0.526908	0.0319732
YPD;;1	3000	0.257984	0.29484	0.499205	0.0749361	0.500795	0.0307763
YPD;15;1	3000	0.222432	0.273814	0.393323	0.066512	0.606677	0.0355337
YPD;37;1	3000	0.312793	0.35072	0.462328	0.0721705	0.537672	0.0324615
Zeocin;25ug/mL;3	3000	0.622115	0.558796	0.724798	0.086152	0.275202	0.0198316
6-azauracil;50ug/mL;3	3001	0.173221	0.22563	0.445305	0.0784522	0.554695	0.0420408
Cadmium_Chloride;75uM;2	3001	0.0944798	0.116607	0.194914	0.0536512	0.805086	0.0540275
Caffeine;15mM;2	3001	0.646215	0.648689	0.71244	0.0939641	0.28756	0.0271608
Cobalt_Chloride;2mM;2	3001	0.576699	0.604444	0.741015	0.0947495	0.258985	0.0254209
Congo_Red;75ug/mL;3	3001	0.134947	0.140993	0.328614	0.0680689	0.671386	0.0478787
Copper_Sulfate;;1	3001	0.30708	0.32134	0.562857	0.0868447	0.437143	0.0357661
Diamide;1.5mM;3	3001	0.314762	0.341681	0.458768	0.0795328	0.541232	0.0413409
EGTA;5mM;3	3001	0.404495	0.324083	0.548388	0.0859049	0.451612	0.0365627
EtOH;;1	3001	0.160934	0.213719	0.373693	0.0723183	0.626307	0.0456704
EtOH_Glucose;;1	3001	0.220029	0.214132	0.384529	0.0732965	0.615471	0.0451304
Fluconazole;100uM;2	3001	0.287158	0.354528	0.599655	0.0889931	0.400345	0.0337198
Formamide;2%;2	3001	0.20506	0.203656	0.384598	0.0733052	0.615402	0.0451267
Fructose;;1	3001	0.33749	0.301604	0.49483	0.0822627	0.50517	0.0394443
Galactose;;1	3001	0.287316	0.298311	0.524941	0.0843548	0.475059	0.0378357
Glycerol;;1	3001	0.192714	0.233532	0.46423	0.0799892	0.53577	0.0410527
Lactate;;1	3001	0.194643	0.26814	0.415218	0.076019	0.584782	0.0435778
Lithium_Chloride;100mM;2	3001	0.49781	0.536537	0.70824	0.0938062	0.29176	0.0274159
Magnesium_Chloride;;1	3001	0.365853	0.326291	0.50026	0.0826299	0.49974	0.0391583
Maltose;;1	3001	0.000549173	0.023465	0.0985672	0.0411787	0.901433	0.0579701
Manganese_Sulfate;;1	3001	0.535739	0.562729	0.772379	0.0953369	0.227621	0.0234677
Mannose;;1	3001	0.304967	0.32212	0.503794	0.0828228	0.496206	0.0389763
Methotrexate;0.4mM;2	3001	0.343563	0.410764	0.708837	0.0938094	0.291163	0.0273816
Neomycin;5mg/mL;2	3001	0.537416	0.533361	0.718906	0.094141	0.281094	0.0267721
Paraquat;0.75mM;3	3001	0.578623	0.617576	0.779904	0.0954308	0.220096	0.0229915
Raffinose;;1	3001	0.305604	0.339481	0.505551	0.0830204	0.494449	0.0388749
SDS;0.075%;3	3001	0.148502	0.196786	0.359772	0.07106	0.640228	0.0463563
Sorbitol;1.5M;2	3001	0.211911	0.340231	0.491096	0.0820001	0.508904	0.0396412
Sucrose;;1	3001	0.249446	0.261513	0.392435	0.0740161	0.607565	0.0447324
Trehalose;;1	3001	0.107697	0.174891	0.305195	0.0658022	0.694805	0.0489942
Tunicamycin;3uM;3	3001	0.322804	0.377709	0.643787	0.0912599	0.356213	0.0312065
Xylose;;1	3001	0.0814075	0.135288	0.329983	0.0682214	0.670017	0.0478103
YNB;;1	3001	0.192202	0.176761	0.376603	0.0725823	0.623397	0.0455257
YNB;ph3;1	3001	0.0262019	0.0222369	0.118949	0.04401	0.881051	0.0571809
YNB;ph8;1	3001	0.0187027	0.0421903	0.175991	0.0513441	0.824009	0.0548433
YPD;;1	3001	0.274599	0.260422	0.433722	0.0775289	0.566278	0.0426358
YPD;15;1	3001	0.159651	0.194308	0.355248	0.0706603	0.644752	0.0465762
YPD;37;1	3001	0.0367977	0.080223	0.163708	0.049846	0.836292	0.0553588
Zeocin;25ug/mL;3	3001	0.104696	0.175017	0.475523	0.080876	0.524477	0.0404589
6-azauracil;50ug/mL;3	3049	0.206156	0.274617	0.520727	0.0764811	0.479273	0.0298674
Cadmium_Chloride;75uM;2	3049	0.861287	0.889322	0.96355	0.0782469	0.0364504	0.00609695
Caffeine;15mM;2	3049	0.357891	0.409538	0.547417	0.0782447	0.452583	0.0286087
Cobalt_Chloride;2mM;2	3049	0.634496	0.636429	0.714262	0.0863059	0.285738	0.020386
Congo_Red;75ug/mL;3	3049	0.219119	0.25597	0.440805	0.0705387	0.559195	0.0335509
Copper_Sulfate;;1	3049	0.875749	0.88884	0.92409	0.0833275	0.0759101	0.00870571
Diamide;1.5mM;3	3049	0.364007	0.356529	0.512186	0.0758823	0.487814	0.0302678
EGTA;5mM;3	3049	0.2175	0.306122	0.522536	0.0766116	0.477464	0.029782
EtOH;;1	3049	0.24857	0.28879	0.476293	0.0733069	0.523707	0.0319302
EtOH_Glucose;;1	3049	0.270123	0.294944	0.470664	0.072871	0.529336	0.0321897
Fluconazole;100uM;2	3049	0.49242	0.530239	0.652314	0.0839754	0.347686	0.0235158
Formamide;2%;2	3049	0.155594	0.184656	0.367138	0.0641875	0.632862	0.0368353
Fructose;;1	3049	0.37444	0.448117	0.598983	0.0813228	0.401017	0.0261346
Galactose;;1	3049	0.860637	0.870292	0.939956	0.0816769	0.060044	0.00769089
Glycerol;;1	3049	0.343879	0.410566	0.587986	0.0807158	0.412014	0.0266663
Lactate;;1	3049	0.273221	0.320313	0.500591	0.0750548	0.499409	0.0308089
Lithium_Chloride;100mM;2	3049	0.609974	0.621013	0.765925	0.0874279	0.234075	0.0176957
Magnesium_Chloride;;1	3049	0.33129	0.348348	0.529086	0.0770624	0.470914	0.0294735
Maltose;;1	3049	0.775197	0.764908	0.930278	0.0827288	0.0697219	0.0083145
Manganese_Sulfate;;1	3049	0.703686	0.752601	0.876991	0.08633	0.123009	0.011551
Mannose;;1	3049	0.352527	0.385888	0.56178	0.0791732	0.43822	0.0279235
Methotrexate;0.4mM;2	3049	0.592783	0.612505	0.752428	0.0872376	0.247572	0.0184052
Neomycin;5mg/mL;2	3049	0.488967	0.502856	0.656182	0.084167	0.343818	0.0233219
Paraquat;0.75mM;3	3049	0.679257	0.687481	0.877821	0.0862899	0.122179	0.0115028
Raffinose;;1	3049	0.52492	0.531646	0.740735	0.0869784	0.259265	0.019018
SDS;0.075%;3	3049	0.488192	0.535991	0.668615	0.0846947	0.331385	0.0227005
Sorbitol;1.5M;2	3049	0.268089	0.314521	0.441837	0.0706247	0.558163	0.0335039
Sucrose;;1	3049	0.325493	0.337077	0.498331	0.0750313	0.501669	0.0309039
Trehalose;;1	3049	0.10907	0.143146	0.329344	0.0606256	0.670656	0.0384758
Tunicamycin;3uM;3	3049	0.760838	0.766234	0.861628	0.0869022	0.138372	0.0124384
Xylose;;1	3049	0.132231	0.166806	0.369751	0.0644212	0.630249	0.0367211
YNB;;1	3049	0.434192	0.458029	0.548581	0.0783349	0.451419	0.0285524
YNB;ph3;1	3049	0.151674	0.138967	0.206163	0.0474071	0.793837	0.0435901
YNB;ph8;1	3049	0.183811	0.221634	0.386884	0.065982	0.613116	0.0359647
YPD;;1	3049	0.306495	0.337886	0.508415	0.0756501	0.491585	0.0304416
YPD;15;1	3049	0.189304	0.203578	0.35429	0.0629897	0.64571	0.0373973
YPD;37;1	3049	0.272904	0.248305	0.410468	0.0680186	0.589532	0.0349169
Zeocin;25ug/mL;3	3049	0.527509	0.602996	0.754635	0.0872398	0.245365	0.0182916
6-azauracil;50ug/mL;3	3003	0.0570927	0.0644253	0.173518	0.0444293	0.826482	0.0445391
Cadmium_Chloride;75uM;2	3003	0.513665	0.518066	0.770709	0.0872003	0.229291	0.017517
Caffeine;15mM;2	3003	0.386189	0.464987	0.635332	0.0835818	0.364668	0.0244155
Cobalt_Chloride;2mM;2	3003	0.657305	0.66267	0.687068	0.0855552	0.312932	0.0218434
Congo_Red;75ug/mL;3	3003	0.240115	0.270658	0.303509	0.0592529	0.696491	0.0394181
Copper_Sulfate;;1	3003	0.485563	0.493547	0.62089	0.0829388	0.37911	0.02512
Diamide;1.5mM;3	3003	0.400573	0.411974	0.469855	0.0737822	0.530145	0.0322029
EGTA;5mM;3	3003	0.419628	0.41253	0.621963	0.0830036	0.378037	0.0250669
EtOH;;1	3003	0.1626	0.218582	0.315536	0.0604673	0.684464	0.0389178
EtOH_Glucose;;1	3003	0.22738	0.217929	0.328979	0.0617929	0.671021	0.0383543
Fluconazole;100uM;2	3003	0.31394	0.348375	0.529757	0.0778507	0.470243	0.0294579
Formamide;2%;2	3003	0.341087	0.393154	0.532586	0.0780849	0.467414	0.0293224
Fructose;;1	3003	0.340002	0.31949	0.402845	0.0684779	0.597155	0.035185
Galactose;;1	3003	0.719845	0.732819	0.862089	0.0859617	0.137911	0.012454
Glycerol;;1	3003	0.284998	0.269231	0.393421	0.0676642	0.606579	0.0355972
Lactate;;1	3003	0.259503	0.334131	0.434855	0.0711244	0.565145	0.0337712
Lithium_Chloride;100mM;2	3003	0.670284	0.69659	0.784805	0.0872548	0.215195	0.0167627
Magnesium_Chloride;;1	3003	0.287464	0.301055	0.40345	0.0685445	0.59655	0.0351574
Maltose;;1	3003	0.432473	0.462949	0.600909	0.0819412	0.399091	0.0260889
Manganese_Sulfate;;1	3003	0.633973	0.661065	0.801857	0.0872272	0.198143	0.0158382
Mannose;;1	3003	0.221291	0.184953	0.29401	0.0582903	0.70599	0.0398094
Methotrexate;0.4mM;2	3003	0.392129	0.388948	0.587243	0.0811767	0.412757	0.0267485
Neomycin;5mg/mL;2	3003	0.435169	0.452862	0.531437	0.0779557	0.468563	0.0293798
Paraquat;0.75mM;3	3003	0.603312	0.575542	0.769029	0.0871769	0.230971	0.0176071
Raffinose;;1	3003	0.338244	0.336795	0.549221	0.0791043	0.450779	0.0285447
SDS;0.075%;3	3003	0.476021	0.455873	0.572732	0.0804486	0.427268	0.0274358
Sorbitol;1.5M;2	3003	0.418149	0.455252	0.631511	0.0834352	0.368489	0.0246011
Sucrose;;1	3003	0.247816	0.260754	0.374981	0.0660848	0.625019	0.0363938
Trehalose;;1	3003	0.0817301	0.083483	0.181453	0.0454449	0.818547	0.0442437
Tunicamycin;3uM;3	3003	0.800592	0.798269	0.909936	0.083165	0.0900637	0.00957991
Xylose;;1	3003	0.0963024	0.111437	0.189163	0.0464408	0.810837	0.0439521
YNB;;1	3003	0.540442	0.572681	0.632449	0.083475	0.367551	0.0245554
YNB;ph3;1	3003	0.231308	0.21273	0.290431	0.0579389	0.709569	0.039955
YNB;ph8;1	3003	0.19522	0.178398	0.244667	0.0529838	0.755333	0.0418041
YPD;;1	3003	0.262935	0.271108	0.329663	0.0618366	0.670337	0.0383272
YPD;15;1	3003	0.265502	0.279741	0.344611	0.063277	0.655389	0.0376948
YPD;37;1	3003	0.607794	0.609005	0.645938	0.084049	0.354062	0.0238932
Zeocin;25ug/mL;3	3003	0.605416	0.640891	0.719893	0.0864595	0.280107	0.0201723
6-azauracil;50ug/mL;3	3004	0.215996	0.235811	0.381108	0.0673347	0.618892	0.0369879
Cadmium_Chloride;75uM;2	3004	0.567039	0.590777	0.811946	0.0889986	0.188054	0.0160442
Caffeine;15mM;2	3004	0.343769	0.425518	0.59867	0.0831903	0.40133	0.0270118
Cobalt_Chloride;2mM;2	3004	0.339329	0.366967	0.699385	0.0875131	0.300615	0.0220155
Congo_Red;75ug/mL;3	3004	0.236075	0.276346	0.397026	0.0687896	0.602974	0.036291
Copper_Sulfate;;1	3004	0.673365	0.713418	0.839354	0.0885704	0.160646	0.0145046
Diamide;1.5mM;3	3004	0.353588	0.350884	0.507175	0.0774926	0.492825	0.0313343
EGTA;5mM;3	3004	0.457634	0.454787	0.678234	0.0867574	0.321766	0.0230907
EtOH;;1	3004	0.348273	0.366543	0.546809	0.0801209	0.453191	0.0294868
EtOH_Glucose;;1	3004	0.191731	0.240983	0.345804	0.0640231	0.654196	0.0385089
Fluconazole;100uM;2	3004	0.542376	0.514228	0.610566	0.0838278	0.389434	0.0264347
Formamide;2%;2	3004	0.194437	0.255286	0.391467	0.0682646	0.608533	0.0365365
Fructose;;1	3004	0.26463	0.312986	0.460028	0.0740246	0.539972	0.033487
Galactose;;1	3004	0.400136	0.375173	0.403387	0.0693166	0.596613	0.0360139
Glycerol;;1	3004	0.349164	0.401682	0.508909	0.0776204	0.491091	0.0312537
Lactate;;1	3004	0.348363	0.370583	0.591128	0.08279	0.408872	0.0273747
Lithium_Chloride;100mM;2	3004	0.700346	0.760672	0.871108	0.0875199	0.128892	0.0126616
Magnesium_Chloride;;1	3004	0.379314	0.442437	0.586901	0.0825507	0.413099	0.0275781
Maltose;;1	3004	0.708018	0.710124	0.914983	0.0847485	0.0850173	0.00997125
Manganese_Sulfate;;1	3004	0.443423	0.498501	0.719125	0.0880767	0.280875	0.0210017
Mannose;;1	3004	0.294086	0.325562	0.46347	0.0742865	0.53653	0.0333317
Methotrexate;0.4mM;2	3004	0.26026	0.302429	0.509868	0.0776551	0.490132	0.0312115
Neomycin;5mg/mL;2	3004	0.498398	0.491737	0.628554	0.0847376	0.371446	0.0255554
Paraquat;0.75mM;3	3004	0.734213	0.715565	0.874767	0.0873676	0.125233	0.0124435
Raffinose;;1	3004	0.389227	0.431507	0.647628	0.0856048	0.352372	0.0246153
SDS;0.075%;3	3004	0.464807	0.522135	0.715036	0.0879701	0.284964	0.0212126
Sorbitol;1.5M;2	3004	0.30454	0.347378	0.500252	0.07701	0.499748	0.0316532
Sucrose;;1	3004	0.335592	0.29068	0.52134	0.07847	0.47866	0.0306776
Trehalose;;1	3004	0.164187	0.192098	0.300876	0.0595157	0.699124	0.0404019
Tunicamycin;3uM;3	3004	0.308846	0.426695	0.825168	0.0888041	0.174832	0.0153091
Xylose;;1	3004	0.0922734	0.121934	0.17975	0.0455318	0.82025	0.0452295
YNB;;1	3004	0.245429	0.261533	0.408898	0.0697945	0.591102	0.0357713
YNB;ph3;1	3004	0.40526	0.413111	0.48656	0.0760617	0.51344	0.0322788
YNB;ph8;1	3004	0.384339	0.372489	0.597745	0.0831391	0.402255	0.0270565
YPD;;1	3004	0.254688	0.318744	0.454373	0.0735748	0.545627	0.0337426
YPD;15;1	3004	0.178715	0.261266	0.326088	0.0620863	0.673912	0.0393457
YPD;37;1	3004	0.456144	0.472688	0.568183	0.0814684	0.431817	0.0284729
Zeocin;25ug/mL;3	3004	0.428954	0.442457	0.593116	0.0828868	0.406884	0.0272798
6-azauracil;50ug/mL;3	3043	0.552197	0.539869	0.641928	0.0823897	0.358072	0.0227216
Cadmium_Chloride;75uM;2	3043	0.676068	0.665442	0.773615	0.0862906	0.226385	0.0161828
Caffeine;15mM;2	3043	0.404823	0.443224	0.505876	0.0744404	0.494124	0.0290777
Cobalt_Chloride;2mM;2	3043	0.815837	0.811961	0.880548	0.0848165	0.119452	0.0104469
Congo_Red;75ug/mL;3	3043	0.626617	0.574397	0.718892	0.0852074	0.281108	0.0189559
Copper_Sulfate;;1	3043	0.275402	0.26515	0.34781	0.0614529	0.65219	0.0360238
Diamide;1.5mM;3	3043	0.623526	0.575767	0.697503	0.0845689	0.302497	0.0200165
EGTA;5mM;3	3043	0.579316	0.586347	0.671974	0.0836379	0.328026	0.0212689
EtOH;;1	3043	0.715776	0.690432	0.817124	0.086366	0.182876	0.0139108
EtOH_Glucose;;1	3043	0.830601	0.842246	0.903793	0.0834612	0.0962071	0.0091177
Fluconazole;100uM;2	3043	0.870892	0.850699	0.859894	0.0856135	0.140106	0.0115978
Formamide;2%;2	3043	0.0717221	0.0906989	0.168785	0.0419084	0.831215	0.0432355
Fructose;;1	3043	0.844801	0.850247	0.905625	0.0833365	0.0943748	0.00901076
Galactose;;1	3043	0.641069	0.629863	0.669588	0.0835704	0.330412	0.0213835
Glycerol;;1	3043	0.490868	0.477295	0.624282	0.081555	0.375718	0.0235665
Lactate;;1	3043	0.424309	0.423083	0.527337	0.0759058	0.472663	0.0280987
Lithium_Chloride;100mM;2	3043	0.329331	0.364799	0.48151	0.0727054	0.51849	0.0301777
Magnesium_Chloride;;1	3043	0.816387	0.827791	0.895862	0.0839712	0.104138	0.00957661
Maltose;;1	3043	0.556681	0.561392	0.668791	0.0835318	0.331209	0.0214227
Manganese_Sulfate;;1	3043	0.65667	0.66174	0.707885	0.0849317	0.292115	0.0195009
Mannose;;1	3043	0.839605	0.852581	0.901225	0.0836267	0.0987753	0.00926726
Methotrexate;0.4mM;2	3043	0.232781	0.311415	0.51545	0.0751066	0.48455	0.0286418
Neomycin;5mg/mL;2	3043	0.660687	0.672322	0.756278	0.0860742	0.243722	0.0170694
Paraquat;0.75mM;3	3043	0.596263	0.59483	0.698116	0.0846191	0.301884	0.0199844
Raffinose;;1	3043	0.830916	0.844877	0.913981	0.0827098	0.086019	0.00851954
SDS;0.075%;3	3043	0.524193	0.509251	0.658853	0.08313	0.341147	0.021905
Sorbitol;1.5M;2	3043	0.337752	0.337048	0.511666	0.0748458	0.488334	0.0288142
Sucrose;;1	3043	0.840351	0.844205	0.913074	0.0827994	0.086926	0.00857225
Trehalose;;1	3043	0.520126	0.518553	0.614415	0.0810539	0.385585	0.0240365
Tunicamycin;3uM;3	3043	0.629178	0.615948	0.763897	0.0861335	0.236103	0.0166837
Xylose;;1	3043	0.454306	0.436815	0.547868	0.0772049	0.452132	0.0271562
YNB;;1	3043	0.881681	0.892455	0.922602	0.0819774	0.0773978	0.0080048
YNB;ph3;1	3043	0.307097	0.312828	0.426371	0.0684619	0.573629	0.0326247
YNB;ph8;1	3043	0.237738	0.230203	0.389361	0.0652572	0.610639	0.0342423
YPD;;1	3043	0.869695	0.881595	0.932356	0.0810035	0.0676439	0.00741262
YPD;15;1	3043	0.489381	0.514969	0.617428	0.0811603	0.382572	0.0238962
YPD;37;1	3043	0.788563	0.785487	0.878608	0.084869	0.121392	0.0105581
Zeocin;25ug/mL;3	3043	0.45603	0.457071	0.534594	0.0764021	0.465406	0.0277645
6-azauracil;50ug/mL;3	3028	0.73694	0.751929	0.902215	0.0825943	0.097785	0.0103645
Cadmium_Chloride;75uM;2	3028	0.734406	0.759085	0.89186	0.0832237	0.10814	0.0109698
Caffeine;15mM;2	3028	0.450174	0.502752	0.677998	0.0830465	0.322002	0.022095
Cobalt_Chloride;2mM;2	3028	0.551838	0.599142	0.775865	0.085351	0.224135	0.0172453
Congo_Red;75ug/mL;3	3028	0.791221	0.781496	0.926053	0.0806925	0.0739469	0.0089262
Copper_Sulfate;;1	3028	0.777297	0.776363	0.849739	0.084882	0.150261	0.0133397
Diamide;1.5mM;3	3028	0.774856	0.778727	0.936391	0.0796302	0.063609	0.00827818
EGTA;5mM;3	3028	0.651782	0.668207	0.843137	0.085016	0.156863	0.0137012
EtOH;;1	3028	0.728746	0.721683	0.89272	0.0831703	0.10728	0.0109202
EtOH_Glucose;;1	3028	0.788353	0.801079	0.936127	0.0796524	0.0638731	0.00829545
Fluconazole;100uM;2	3028	0.227172	0.24002	0.246775	0.0509743	0.753225	0.040823
Formamide;2%;2	3028	0.477122	0.509487	0.612654	0.0801724	0.387346	0.0251875
Fructose;;1	3028	0.825855	0.82853	0.948251	0.0781782	0.0517486	0.00751207
Galactose;;1	3028	0.825227	0.820571	0.934109	0.0798724	0.0658911	0.00842319
Glycerol;;1	3028	0.595141	0.641339	0.805609	0.0854626	0.194391	0.0157034
Lactate;;1	3028	0.605664	0.607201	0.769606	0.0853231	0.230394	0.017563
Lithium_Chloride;100mM;2	3028	0.496026	0.543107	0.669087	0.0827449	0.330913	0.0225206
Magnesium_Chloride;;1	3028	0.804562	0.837271	0.95645	0.077003	0.04355	0.00696491
Maltose;;1	3028	0.69044	0.720103	0.865209	0.0844208	0.134791	0.0124844
Manganese_Sulfate;;1	3028	0.587943	0.617673	0.775298	0.0853818	0.224702	0.0172722
Mannose;;1	3028	0.836916	0.844502	0.951631	0.0777121	0.0483694	0.00728852
Methotrexate;0.4mM;2	3028	0.479499	0.526936	0.692584	0.0835435	0.307416	0.021391
Neomycin;5mg/mL;2	3028	0.680046	0.659935	0.863178	0.0844536	0.136822	0.0125999
Paraquat;0.75mM;3	3028	0.626141	0.616079	0.851523	0.0848293	0.148477	0.0132423
Raffinose;;1	3028	0.800975	0.80313	0.942154	0.0789613	0.0578457	0.00790905
SDS;0.075%;3	3028	0.730418	0.750822	0.933653	0.0799011	0.0663468	0.00845333
Sorbitol;1.5M;2	3028	0.435601	0.515064	0.624169	0.0807739	0.375831	0.0246479
Sucrose;;1	3028	0.818469	0.822573	0.958651	0.0766582	0.0413486	0.00681524
Trehalose;;1	3028	0.7228	0.741793	0.888558	0.0833986	0.111442	0.011161
Tunicamycin;3uM;3	3028	0.717941	0.785603	0.868813	0.0842915	0.131187	0.0122828
Xylose;;1	3028	0.582527	0.589891	0.746842	0.0849709	0.253158	0.0187148
YNB;;1	3028	0.874854	0.887483	0.978851	0.0727426	0.0211495	0.00537029
YNB;ph3;1	3028	0.00244909	0.0462071	0.0679454	0.028211	0.932055	0.0471633
YNB;ph8;1	3028	0.149562	0.182391	0.289995	0.0555197	0.710005	0.0391241
YPD;;1	3028	0.817734	0.835125	0.952925	0.077527	0.0470748	0.00720216
YPD;15;1	3028	0.498477	0.51706	0.731957	0.0846581	0.268043	0.0194581
YPD;37;1	3028	0.756141	0.753027	0.883317	0.0836554	0.116683	0.0114625
Zeocin;25ug/mL;3	3028	0.454381	0.450842	0.58266	0.0786275	0.41734	0.0265703

## Sheet: Multiple VC model (3 epistasis components)
Trait	Cross	Component	Fraction_of_variance	Standard Error
6-azauracil	375	Residual	0.105355	0.00503974
6-azauracil	375	Repeatibility	0.181182	0.0575523
6-azauracil	375	A ○ A	0.0270496	0.0617796
6-azauracil	375	Q ○ A	0.0907701	0.0333379
6-azauracil	375	Q ○ Q	0.0864963	0.0226961
6-azauracil	375	A	0.0631612	0.0181166
6-azauracil	375	Q	0.445986	0.182985
Cadmium Chloride	375	Residual	0.0465739	0.00222917
Cadmium Chloride	375	Repeatibility	0.106972	0.0325829
Cadmium Chloride	375	A ○ A	0.00486768	0.0330097
Cadmium Chloride	375	Q ○ A	0.0761088	0.0187429
Cadmium Chloride	375	Q ○ Q	0.0100052	0.0059799
Cadmium Chloride	375	A	0.0408544	0.0109026
Cadmium Chloride	375	Q	0.714618	0.306954
Caffeine	375	Residual	0.0694406	0.00341112
Caffeine	375	Repeatibility	0.105556	0.0331127
Caffeine	375	A ○ A	5.64356e-10	0.0370093
Caffeine	375	Q ○ A	0.0374393	0.0229935
Caffeine	375	Q ○ Q	0.0156142	0.00806437
Caffeine	375	A	0.112513	0.0205302
Caffeine	375	Q	0.659437	0.216437
Cobalt Chloride	375	Residual	0.0832462	0.00398213
Cobalt Chloride	375	Repeatibility	0.136844	0.0426312
Cobalt Chloride	375	A ○ A	0.012454	0.0460246
Cobalt Chloride	375	Q ○ A	0.0802018	0.030341
Cobalt Chloride	375	Q ○ Q	3.47659e-11	0.00853941
Cobalt Chloride	375	A	0.0408441	0.0128607
Cobalt Chloride	375	Q	0.64641	0.20313
Congo Red	375	Residual	0.0688546	0.00329
Congo Red	375	Repeatibility	0.123916	0.0325079
Congo Red	375	A ○ A	6.52066e-05	0.0346817
Congo Red	375	Q ○ A	0.0388213	0.0178691
Congo Red	375	Q ○ Q	0.039662	0.0113418
Congo Red	375	A	0.0321334	0.00972551
Congo Red	375	Q	0.696548	0.283271
Copper Sulfate	375	Residual	0.117782	0.00563103
Copper Sulfate	375	Repeatibility	0.0798933	0.0489549
Copper Sulfate	375	A ○ A	0.0356294	0.0516508
Copper Sulfate	375	Q ○ A	0.196886	0.0302969
Copper Sulfate	375	Q ○ Q	0.0318473	0.0157956
Copper Sulfate	375	A	0.0525009	0.0149129
Copper Sulfate	375	Q	0.48546	0.263302
Diamide	375	Residual	0.116041	0.00555083
Diamide	375	Repeatibility	0.134461	0.0498658
Diamide	375	A ○ A	0.0456011	0.0555755
Diamide	375	Q ○ A	0.0686126	0.0294542
Diamide	375	Q ○ Q	0.0831889	0.021409
Diamide	375	A	0.0406813	0.0136341
Diamide	375	Q	0.511414	0.213177
EGTA	375	Residual	0.13236	0.00633141
EGTA	375	Repeatibility	0.148714	0.0479161
EGTA	375	A ○ A	0.0825816	0.0532177
EGTA	375	Q ○ A	9.16981e-06	0.0253247
EGTA	375	Q ○ Q	0.00160593	0.00583355
EGTA	375	A	0.0472194	0.0143607
EGTA	375	Q	0.58751	0.225625
EtOH	375	Residual	0.121122	0.00579066
EtOH	375	Repeatibility	0.16393	0.0510246
EtOH	375	A ○ A	1.14677e-10	0.0538428
EtOH	375	Q ○ A	0.0903544	0.0291233
EtOH	375	Q ○ Q	0.0848308	0.0224148
EtOH	375	A	0.06445	0.0172972
EtOH	375	Q	0.475312	0.207064
EtOH Glu	375	Residual	0.12432	0.00598402
EtOH Glu	375	Repeatibility	0.199349	0.0604197
EtOH Glu	375	A ○ A	4.68082e-11	0.0641509
EtOH Glu	375	Q ○ A	0.112486	0.0349292
EtOH Glu	375	Q ○ Q	0.0819417	0.0231648
EtOH Glu	375	A	0.0737752	0.0200466
EtOH Glu	375	Q	0.408129	0.179032
Fluconazole	375	Residual	0.0699406	0.00334378
Fluconazole	375	Repeatibility	0.213387	0.0496506
Fluconazole	375	A ○ A	2.92806e-11	0.0548058
Fluconazole	375	Q ○ A	0.055831	0.0319613
Fluconazole	375	Q ○ Q	0.0365069	0.0125601
Fluconazole	375	A	0.0309095	0.0124285
Fluconazole	375	Q	0.593425	0.220156
Formamide	375	Residual	0.254527	0.0155861
Formamide	375	Repeatibility	1.52301e-10	0.067567
Formamide	375	A ○ A	0.1639	0.0741531
Formamide	375	Q ○ A	0.0999303	0.033169
Formamide	375	Q ○ Q	0.0324312	0.0150499
Formamide	375	A	0.0705513	0.0201471
Formamide	375	Q	0.378661	0.193876
Fructose	375	Residual	0.11479	0.00548487
Fructose	375	Repeatibility	0.181156	0.0520442
Fructose	375	A ○ A	1.05665e-05	0.0573222
Fructose	375	Q ○ A	0.0738286	0.0328471
Fructose	375	Q ○ Q	0.107322	0.0239484
Fructose	375	A	0.0431476	0.014566
Fructose	375	Q	0.479746	0.186149
Galactose	375	Residual	0.0492291	0.00235492
Galactose	375	Repeatibility	0.149391	0.0371905
Galactose	375	A ○ A	4.58748e-07	0.0391171
Galactose	375	Q ○ A	0.0663173	0.0202418
Galactose	375	Q ○ Q	0.0426295	0.0134971
Galactose	375	A	0.0247193	0.00922627
Galactose	375	Q	0.667713	0.301206
Glycerol	375	Residual	0.14356	0.00688661
Glycerol	375	Repeatibility	0.176809	0.0649039
Glycerol	375	A ○ A	0.0580196	0.0734479
Glycerol	375	Q ○ A	0.0983149	0.0410189
Glycerol	375	Q ○ Q	0.0657116	0.0197107
Glycerol	375	A	0.0456891	0.0167987
Glycerol	375	Q	0.411895	0.166188
Lactate	375	Residual	0.153438	0.00733566
Lactate	375	Repeatibility	0.143417	0.0620336
Lactate	375	A ○ A	0.0323369	0.0667832
Lactate	375	Q ○ A	0.117706	0.0385582
Lactate	375	Q ○ Q	0.0660259	0.0193133
Lactate	375	A	0.118582	0.0265379
Lactate	375	Q	0.368494	0.150462
Lithium Chloride	375	Residual	0.0518555	0.00251353
Lithium Chloride	375	Repeatibility	0.180841	0.034367
Lithium Chloride	375	A ○ A	2.60442e-11	0.0384447
Lithium Chloride	375	Q ○ A	0.00093472	0.0225136
Lithium Chloride	375	Q ○ Q	0.00294124	0.00672433
Lithium Chloride	375	A	0.0423127	0.0120226
Lithium Chloride	375	Q	0.721115	0.225948
Magnesium Chloride	375	Residual	0.140637	0.00680429
Magnesium Chloride	375	Repeatibility	0.202799	0.0662166
Magnesium Chloride	375	A ○ A	0.0519541	0.0737774
Magnesium Chloride	375	Q ○ A	0.0707504	0.0390099
Magnesium Chloride	375	Q ○ Q	0.0825998	0.0225308
Magnesium Chloride	375	A	0.0716379	0.0207715
Magnesium Chloride	375	Q	0.379623	0.159809
Maltose	375	Residual	0.0372502	0.00182477
Maltose	375	Repeatibility	0.0896322	0.0237342
Maltose	375	A ○ A	0.00830538	0.0248579
Maltose	375	Q ○ A	0.0315712	0.0121617
Maltose	375	Q ○ Q	0.023509	0.00765323
Maltose	375	A	0.0198756	0.00649947
Maltose	375	Q	0.789856	0.348
Manganese Sulfate	375	Residual	0.0607372	0.00291541
Manganese Sulfate	375	Repeatibility	0.241635	0.0585267
Manganese Sulfate	375	A ○ A	0.00723376	0.0659003
Manganese Sulfate	375	Q ○ A	0.058404	0.0425152
Manganese Sulfate	375	Q ○ Q	0.0448314	0.0160213
Manganese Sulfate	375	A	0.0713157	0.0201855
Manganese Sulfate	375	Q	0.515843	0.168766
Mannose	375	Residual	0.106735	0.00510858
Mannose	375	Repeatibility	0.195099	0.052133
Mannose	375	A ○ A	4.38217e-11	0.0584806
Mannose	375	Q ○ A	0.0483688	0.0356013
Mannose	375	Q ○ Q	0.119705	0.0234132
Mannose	375	A	0.0432086	0.0148407
Mannose	375	Q	0.486884	0.171809
Methotrexate	375	Residual	0.337729	0.01747
Methotrexate	375	Repeatibility	0.295324	0.0785785
Methotrexate	375	A ○ A	1.67888e-10	0.0821024
Methotrexate	375	Q ○ A	0.000814589	0.0285092
Methotrexate	375	Q ○ Q	0.00909539	0.00981361
Methotrexate	375	A	0.0671931	0.0219875
Methotrexate	375	Q	0.289843	0.123692
Neomycin	375	Residual	0.122209	0.00584262
Neomycin	375	Repeatibility	0.112999	0.0482216
Neomycin	375	A ○ A	0.0382818	0.0546106
Neomycin	375	Q ○ A	0.0690964	0.0309105
Neomycin	375	Q ○ Q	0.0658843	0.017276
Neomycin	375	A	0.0749896	0.0183563
Neomycin	375	Q	0.51654	0.200536
Paraquat	375	Residual	0.0760083	0.00363386
Paraquat	375	Repeatibility	0.144618	0.0438654
Paraquat	375	A ○ A	3.32304e-05	0.0499295
Paraquat	375	Q ○ A	0.0640154	0.035194
Paraquat	375	Q ○ Q	0.0278696	0.0128567
Paraquat	375	A	0.0851148	0.0196586
Paraquat	375	Q	0.602341	0.17923
Raffinose	375	Residual	0.0651753	0.00313553
Raffinose	375	Repeatibility	0.141173	0.0407259
Raffinose	375	A ○ A	5.11549e-11	0.0439211
Raffinose	375	Q ○ A	0.0780058	0.0238925
Raffinose	375	Q ○ Q	0.0621775	0.0172798
Raffinose	375	A	0.0503766	0.0136556
Raffinose	375	Q	0.603092	0.252944
SDS	375	Residual	0.0515434	0.00246284
SDS	375	Repeatibility	0.136815	0.0379708
SDS	375	A ○ A	0.054253	0.0402416
SDS	375	Q ○ A	0.0211521	0.0148388
SDS	375	Q ○ Q	0.252804	0.082069
SDS	375	A	0.0304254	0.0100221
SDS	375	Q	0.453007	0.252509
Sorbitol	375	Residual	0.111243	0.00532438
Sorbitol	375	Repeatibility	0.196495	0.0565897
Sorbitol	375	A ○ A	0.0249629	0.0628987
Sorbitol	375	Q ○ A	0.0625272	0.0378257
Sorbitol	375	Q ○ Q	0.0480417	0.0152698
Sorbitol	375	A	0.0457042	0.015784
Sorbitol	375	Q	0.511026	0.18505
Sucrose	375	Residual	0.129664	0.00619905
Sucrose	375	Repeatibility	0.147179	0.0521303
Sucrose	375	A ○ A	0.000339969	0.0393295
Sucrose	375	Q ○ A	0.1142	0.0302708
Sucrose	375	Q ○ Q	0.0846531	0.0243585
Sucrose	375	A	0.0769219	0.0190445
Sucrose	375	Q	0.447042	0.204965
Trehalose	375	Residual	0.134496	0.00647385
Trehalose	375	Repeatibility	0.204497	0.0654987
Trehalose	375	A ○ A	0.0737248	0.069537
Trehalose	375	Q ○ A	0.0650287	0.0299996
Trehalose	375	Q ○ Q	0.0670404	0.0235896
Trehalose	375	A	0.0603603	0.0185547
Trehalose	375	Q	0.394852	0.202282
Tunicamycin	375	Residual	0.119214	0.00569628
Tunicamycin	375	Repeatibility	0.107033	0.0371726
Tunicamycin	375	A ○ A	0.012318	0.0428279
Tunicamycin	375	Q ○ A	0.0271826	0.0298993
Tunicamycin	375	Q ○ Q	0.0240336	0.0107515
Tunicamycin	375	A	0.0615097	0.0152676
Tunicamycin	375	Q	0.648709	0.188016
Xylose	375	Residual	0.160343	0.00767432
Xylose	375	Repeatibility	0.173937	0.0654822
Xylose	375	A ○ A	0.0411147	0.0694619
Xylose	375	Q ○ A	0.124542	0.035148
Xylose	375	Q ○ Q	0.0833606	0.0268023
Xylose	375	A	0.0735821	0.0205983
Xylose	375	Q	0.343121	0.167033
YNB	375	Residual	0.0813322	0.00388835
YNB	375	Repeatibility	0.107726	0.0285429
YNB	375	A ○ A	8.74288e-07	0.0300332
YNB	375	Q ○ A	0.0256145	0.0137729
YNB	375	Q ○ Q	0.0407111	0.0122953
YNB	375	A	0.0296983	0.00867904
YNB	375	Q	0.714917	0.339505
YNB ph3	375	Residual	0.674997	0.032316
YNB ph3	375	Repeatibility	0.172126	0.0827445
YNB ph3	375	A ○ A	5.16902e-07	0.0772996
YNB ph3	375	Q ○ A	0.0314129	0.0184069
YNB ph3	375	Q ○ Q	0.0390051	0.0574079
YNB ph3	375	A	0.0246203	0.0145382
YNB ph3	375	Q	0.0578386	0.0593821
YNB ph8	375	Residual	0.554294	0.0266457
YNB ph8	375	Repeatibility	0.178972	0.0751712
YNB ph8	375	A ○ A	4.42966e-10	0.0712954
YNB ph8	375	Q ○ A	0.00463308	0.0167057
YNB ph8	375	Q ○ Q	0.0460717	0.0398463
YNB ph8	375	A	0.0802296	0.0223314
YNB ph8	375	Q	0.135799	0.113692
YPD	375	Residual	0.14419	0.00688966
YPD	375	Repeatibility	0.192464	0.0586571
YPD	375	A ○ A	5.04591e-11	0.0628067
YPD	375	Q ○ A	0.0961442	0.0346328
YPD	375	Q ○ Q	0.0744639	0.0206025
YPD	375	A	0.0591627	0.0177574
YPD	375	Q	0.433576	0.181682
YPD 15C	375	Residual	0.102927	0.00492354
YPD 15C	375	Repeatibility	0.138366	0.0458871
YPD 15C	375	A ○ A	5.76211e-11	0.0495942
YPD 15C	375	Q ○ A	0.0863368	0.0280908
YPD 15C	375	Q ○ Q	0.115744	0.0258029
YPD 15C	375	A	0.0566071	0.0153279
YPD 15C	375	Q	0.500019	0.200877
YPD 37C	375	Residual	0.111781	0.00535908
YPD 37C	375	Repeatibility	0.179462	0.0497109
YPD 37C	375	A ○ A	0.00408139	0.051875
YPD 37C	375	Q ○ A	0.0608319	0.0283546
YPD 37C	375	Q ○ Q	0.0578414	0.0160936
YPD 37C	375	A	0.0491161	0.0149255
YPD 37C	375	Q	0.536887	0.214814
Zeocin	375	Residual	0.0510311	0.00243974
Zeocin	375	Repeatibility	0.109035	0.0462935
Zeocin	375	A ○ A	0.0802515	0.0544511
Zeocin	375	Q ○ A	0.0282502	0.0331649
Zeocin	375	Q ○ Q	0.0427563	0.0131186
Zeocin	375	A	0.147962	0.0274018
Zeocin	375	Q	0.540714	0.181639
6-azauracil	A	Residual	0.181155	0.00832459
6-azauracil	A	Repeatibility	0.246323	0.0536622
6-azauracil	A	A ○ A	1.13776e-10	0.0579336
6-azauracil	A	Q ○ A	0.0335542	0.0336446
6-azauracil	A	Q ○ Q	0.0131396	0.0101784
6-azauracil	A	A	0.0856047	0.0213728
6-azauracil	A	Q	0.440223	0.161018
Cadmium Chloride	A	Residual	0.0455838	0.00210006
Cadmium Chloride	A	Repeatibility	0.032439	0.0127859
Cadmium Chloride	A	A ○ A	6.8392e-10	0.0135606
Cadmium Chloride	A	Q ○ A	0.0408062	0.00950959
Cadmium Chloride	A	Q ○ Q	0.0180481	0.00474993
Cadmium Chloride	A	A	0.0122348	0.00391417
Cadmium Chloride	A	Q	0.850888	0.301814
Caffeine	A	Residual	0.0842916	0.00387928
Caffeine	A	Repeatibility	0.0803164	0.0218384
Caffeine	A	A ○ A	0.00621601	0.0282649
Caffeine	A	Q ○ A	0.00258427	0.0237935
Caffeine	A	Q ○ Q	0.0191284	0.00880057
Caffeine	A	A	0.0631184	0.0132907
Caffeine	A	Q	0.744345	0.187379
Cobalt Chloride	A	Residual	0.0769845	0.00356014
Cobalt Chloride	A	Repeatibility	0.151983	0.0384832
Cobalt Chloride	A	A ○ A	0.00679213	0.0469774
Cobalt Chloride	A	Q ○ A	0.0604721	0.0350149
Cobalt Chloride	A	Q ○ Q	0.0302621	0.0125782
Cobalt Chloride	A	A	0.0707753	0.0172798
Cobalt Chloride	A	Q	0.602731	0.186756
Congo Red	A	Residual	0.219219	0.0100682
Congo Red	A	Repeatibility	0.160731	0.0446458
Congo Red	A	A ○ A	1.19258e-10	0.047447
Congo Red	A	Q ○ A	0.0417677	0.0262438
Congo Red	A	Q ○ Q	0.0232521	0.00980168
Congo Red	A	A	0.0536193	0.0151103
Congo Red	A	Q	0.501411	0.200225
Copper Sulfate	A	Residual	0.186804	0.00857524
Copper Sulfate	A	Repeatibility	0.182825	0.0420458
Copper Sulfate	A	A ○ A	0.00235845	0.0442801
Copper Sulfate	A	Q ○ A	6.81995e-05	0.0298423
Copper Sulfate	A	Q ○ Q	0.02908	0.0108194
Copper Sulfate	A	A	0.0559079	0.0154968
Copper Sulfate	A	Q	0.542956	0.180436
Diamide	A	Residual	0.129594	0.00595515
Diamide	A	Repeatibility	0.145962	0.0362764
Diamide	A	A ○ A	0.00590332	0.0388754
Diamide	A	Q ○ A	0.0294618	0.0219469
Diamide	A	Q ○ Q	0.0402214	0.0112333
Diamide	A	A	0.0531902	0.0137643
Diamide	A	Q	0.595668	0.2275
EGTA	A	Residual	0.132191	0.00607453
EGTA	A	Repeatibility	0.103005	0.037348
EGTA	A	A ○ A	0.0647074	0.0456469
EGTA	A	Q ○ A	0.00714579	0.0308573
EGTA	A	Q ○ Q	0.0235543	0.0107013
EGTA	A	A	0.106855	0.0216665
EGTA	A	Q	0.562541	0.175234
EtOH	A	Residual	0.206035	0.00949053
EtOH	A	Repeatibility	0.105046	0.0375336
EtOH	A	A ○ A	0.0262613	0.0435309
EtOH	A	Q ○ A	0.0148371	0.0248941
EtOH	A	Q ○ Q	0.0238154	0.00897411
EtOH	A	A	0.0695048	0.0162649
EtOH	A	Q	0.5545	0.213706
EtOH Glu	A	Residual	0.18836	0.00867303
EtOH Glu	A	Repeatibility	0.184195	0.0464752
EtOH Glu	A	A ○ A	1.06713e-05	0.0503333
EtOH Glu	A	Q ○ A	0.0392693	0.0272243
EtOH Glu	A	Q ○ Q	0.0340038	0.0119898
EtOH Glu	A	A	0.0747124	0.0184464
EtOH Glu	A	Q	0.479449	0.192654
Fluconazole	A	Residual	0.0856273	0.00394114
Fluconazole	A	Repeatibility	0.16859	0.0438205
Fluconazole	A	A ○ A	3.82039e-07	0.0479834
Fluconazole	A	Q ○ A	0.0996131	0.0309766
Fluconazole	A	Q ○ Q	0.0488435	0.0145952
Fluconazole	A	A	0.0771065	0.0185375
Fluconazole	A	Q	0.520219	0.194414
Formamide	A	Residual	0.483301	0.0226731
Formamide	A	Repeatibility	0.151205	0.0655921
Formamide	A	A ○ A	4.98812e-08	0.0646263
Formamide	A	Q ○ A	0.0731244	0.0312614
Formamide	A	Q ○ Q	0.0107861	0.00885505
Formamide	A	A	0.0629659	0.0192204
Formamide	A	Q	0.218618	0.106709
Fructose	A	Residual	0.185569	0.00851853
Fructose	A	Repeatibility	0.150524	0.0410421
Fructose	A	A ○ A	3.36016e-05	0.0443086
Fructose	A	Q ○ A	0.034759	0.0246993
Fructose	A	Q ○ Q	0.0285674	0.0103365
Fructose	A	A	0.0759059	0.0177317
Fructose	A	Q	0.524641	0.202718
Galactose	A	Residual	0.211475	0.00970783
Galactose	A	Repeatibility	0.170501	0.0512364
Galactose	A	A ○ A	0.0138816	0.0536315
Galactose	A	Q ○ A	0.0816161	0.0296786
Galactose	A	Q ○ Q	1.59927e-10	0.006884
Galactose	A	A	0.0909745	0.0213719
Galactose	A	Q	0.431552	0.180679
Glycerol	A	Residual	0.310139	0.0143268
Glycerol	A	Repeatibility	0.136578	0.0492887
Glycerol	A	A ○ A	0.0153048	0.0557071
Glycerol	A	Q ○ A	0.039287	0.0355673
Glycerol	A	Q ○ Q	9.62547e-08	0.00987203
Glycerol	A	A	0.0728083	0.0191156
Glycerol	A	Q	0.425882	0.143272
Lactate	A	Residual	0.334461	0.0153734
Lactate	A	Repeatibility	0.067079	0.0389089
Lactate	A	A ○ A	2.23255e-10	0.043897
Lactate	A	Q ○ A	0.0217155	0.0289416
Lactate	A	Q ○ Q	0.00757491	0.00865202
Lactate	A	A	0.093274	0.0199723
Lactate	A	Q	0.475896	0.152771
Lithium Chloride	A	Residual	0.0301785	0.00138903
Lithium Chloride	A	Repeatibility	0.0707166	0.0177062
Lithium Chloride	A	A ○ A	1.04266e-05	0.0224209
Lithium Chloride	A	Q ○ A	0.0204151	0.0180078
Lithium Chloride	A	Q ○ Q	0.0292857	0.00754497
Lithium Chloride	A	A	0.0442568	0.0097042
Lithium Chloride	A	Q	0.805137	0.218149
Magnesium Chloride	A	Residual	0.125322	0.00575569
Magnesium Chloride	A	Repeatibility	0.0976943	0.0251371
Magnesium Chloride	A	A ○ A	1.77735e-05	0.0271163
Magnesium Chloride	A	Q ○ A	0.00211276	0.0141619
Magnesium Chloride	A	Q ○ Q	0.0287119	0.00781251
Magnesium Chloride	A	A	0.0505607	0.0114622
Magnesium Chloride	A	Q	0.695581	0.254788
Maltose	A	Residual	0.08213	0.00396676
Maltose	A	Repeatibility	0.139828	0.0273217
Maltose	A	A ○ A	3.28973e-11	0.0278844
Maltose	A	Q ○ A	0.00118961	0.0123422
Maltose	A	Q ○ Q	0.132373	0.0304543
Maltose	A	A	0.0355671	0.00950103
Maltose	A	Q	0.608912	0.274291
Manganese Sulfate	A	Residual	0.0483103	0.00221892
Manganese Sulfate	A	Repeatibility	0.0406956	0.0223256
Manganese Sulfate	A	A ○ A	0.030578	0.0313363
Manganese Sulfate	A	Q ○ A	0.0606093	0.0276063
Manganese Sulfate	A	Q ○ Q	0.0438926	0.0115837
Manganese Sulfate	A	A	0.0325806	0.0094609
Manganese Sulfate	A	Q	0.743334	0.195054
Mannose	A	Residual	0.170638	0.00783722
Mannose	A	Repeatibility	0.200344	0.0454608
Mannose	A	A ○ A	1.05046e-10	0.0532385
Mannose	A	Q ○ A	0.0158999	0.0342825
Mannose	A	Q ○ Q	0.0365799	0.012849
Mannose	A	A	0.0583507	0.016602
Mannose	A	Q	0.518188	0.171273
Methotrexate	A	Residual	0.333078	0.0153478
Methotrexate	A	Repeatibility	0.0530197	0.0472729
Methotrexate	A	A ○ A	0.0665763	0.0547014
Methotrexate	A	Q ○ A	0.046762	0.0330845
Methotrexate	A	Q ○ Q	0.00815827	0.00953876
Methotrexate	A	A	0.0763574	0.0191302
Methotrexate	A	Q	0.416049	0.147756
Neomycin	A	Residual	0.0925284	0.00429473
Neomycin	A	Repeatibility	0.174252	0.0418117
Neomycin	A	A ○ A	0.0367142	0.0517004
Neomycin	A	Q ○ A	1.77298e-06	0.0371981
Neomycin	A	Q ○ Q	0.0861073	0.0173001
Neomycin	A	A	0.0483456	0.0147831
Neomycin	A	Q	0.56205	0.170289
Paraquat	A	Residual	0.0901976	0.00414063
Paraquat	A	Repeatibility	0.0929445	0.030299
Paraquat	A	A ○ A	0.0397597	0.0374123
Paraquat	A	Q ○ A	9.24091e-11	0.0285988
Paraquat	A	Q ○ Q	0.0320562	0.0111094
Paraquat	A	A	0.122042	0.0223359
Paraquat	A	Q	0.623	0.169793
Raffinose	A	Residual	0.182717	0.00883638
Raffinose	A	Repeatibility	0.160419	0.0440342
Raffinose	A	A ○ A	0.00289841	0.0515145
Raffinose	A	Q ○ A	0.0473649	0.0335181
Raffinose	A	Q ○ Q	0.0093578	0.00979538
Raffinose	A	A	0.0549443	0.0157177
Raffinose	A	Q	0.542299	0.185292
SDS	A	Residual	0.0720148	0.00330771
SDS	A	Repeatibility	0.117242	0.045214
SDS	A	A ○ A	0.0868406	0.0529236
SDS	A	Q ○ A	0.10344	0.0338644
SDS	A	Q ○ Q	0.0246142	0.011717
SDS	A	A	0.0737585	0.0185127
SDS	A	Q	0.52209	0.195031
Sorbitol	A	Residual	0.145612	0.00673
Sorbitol	A	Repeatibility	0.277125	0.061971
Sorbitol	A	A ○ A	0.0280053	0.0689235
Sorbitol	A	Q ○ A	0.0857709	0.0387822
Sorbitol	A	Q ○ Q	5.54284e-06	0.00931566
Sorbitol	A	A	0.045053	0.01665
Sorbitol	A	Q	0.418429	0.168425
Sucrose	A	Residual	0.0975738	0.00447912
Sucrose	A	Repeatibility	0.0815674	0.0217686
Sucrose	A	A ○ A	6.43845e-11	0.0222812
Sucrose	A	Q ○ A	0.0205584	0.0107778
Sucrose	A	Q ○ Q	0.0153709	0.00572596
Sucrose	A	A	0.0379742	0.00890681
Sucrose	A	Q	0.746955	0.32665
Trehalose	A	Residual	0.349526	0.0161603
Trehalose	A	Repeatibility	0.106141	0.0507337
Trehalose	A	A ○ A	0.0629145	0.0570957
Trehalose	A	Q ○ A	0.0232653	0.0308407
Trehalose	A	Q ○ Q	0.0143121	0.00933885
Trehalose	A	A	0.023586	0.0114697
Trehalose	A	Q	0.420255	0.161972
Tunicamycin	A	Residual	0.202204	0.00928654
Tunicamycin	A	Repeatibility	0.069036	0.0363101
Tunicamycin	A	A ○ A	0.0391198	0.0503321
Tunicamycin	A	Q ○ A	0.0349559	0.0449345
Tunicamycin	A	Q ○ Q	2.53031e-06	0.0154941
Tunicamycin	A	A	0.117819	0.0239703
Tunicamycin	A	Q	0.536863	0.134119
Xylose	A	Residual	0.443874	0.0205257
Xylose	A	Repeatibility	0.118739	0.0515132
Xylose	A	A ○ A	0.000119283	0.0530689
Xylose	A	Q ○ A	0.0134511	0.0259353
Xylose	A	Q ○ Q	0.0252079	0.0101473
Xylose	A	A	0.0471995	0.0150389
Xylose	A	Q	0.351409	0.15329
YNB	A	Residual	0.371021	0.0170146
YNB	A	Repeatibility	0.206674	0.0608817
YNB	A	A ○ A	3.85188e-10	0.0628382
YNB	A	Q ○ A	0.0450768	0.0301058
YNB	A	Q ○ Q	0.00417131	0.00729922
YNB	A	A	0.0674849	0.0195156
YNB	A	Q	0.305572	0.140923
YNB ph3	A	Residual	0.651517	0.0298907
YNB ph3	A	Repeatibility	0.0548966	0.057203
YNB ph3	A	A ○ A	1.28904e-09	0.0569395
YNB ph3	A	Q ○ A	0.029937	0.0262932
YNB ph3	A	Q ○ Q	1.49165e-05	0.0055689
YNB ph3	A	A	0.032661	0.0133306
YNB ph3	A	Q	0.230974	0.106415
YNB ph8	A	Residual	0.141912	0.00651376
YNB ph8	A	Repeatibility	0.017496	0.0144531
YNB ph8	A	A ○ A	4.80277e-06	0.0141713
YNB ph8	A	Q ○ A	0.0147614	0.00606739
YNB ph8	A	Q ○ Q	0.00290103	0.00214753
YNB ph8	A	A	0.0150144	0.00437155
YNB ph8	A	Q	0.80791	0.390729
YPD	A	Residual	0.25438	0.0116713
YPD	A	Repeatibility	0.108427	0.0415087
YPD	A	A ○ A	1.06093e-10	0.0453938
YPD	A	Q ○ A	0.046915	0.0268513
YPD	A	Q ○ Q	0.0296898	0.0109259
YPD	A	A	0.0682629	0.0168532
YPD	A	Q	0.492325	0.184233
YPD 15C	A	Residual	0.217436	0.00997643
YPD 15C	A	Repeatibility	0.264681	0.0525187
YPD 15C	A	A ○ A	4.5292e-05	0.0527263
YPD 15C	A	Q ○ A	7.38088e-08	0.0208615
YPD 15C	A	Q ○ Q	0.0122094	0.00710647
YPD 15C	A	A	0.0558058	0.0163456
YPD 15C	A	Q	0.449822	0.228022
YPD 37C	A	Residual	0.0838566	0.00385137
YPD 37C	A	Repeatibility	0.069979	0.0188053
YPD 37C	A	A ○ A	1.70749e-05	0.0206645
YPD 37C	A	Q ○ A	0.0159087	0.0125721
YPD 37C	A	Q ○ Q	0.0203906	0.00572959
YPD 37C	A	A	0.0211	0.00627258
YPD 37C	A	Q	0.788748	0.280527
Zeocin	A	Residual	0.0583342	0.00268072
Zeocin	A	Repeatibility	0.12189	0.0273102
Zeocin	A	A ○ A	0.00826205	0.0350839
Zeocin	A	Q ○ A	0.0081669	0.0279614
Zeocin	A	Q ○ Q	0.0222969	0.0100337
Zeocin	A	A	0.0807217	0.016611
Zeocin	A	Q	0.700328	0.192066
6-azauracil	376	Residual	0.336192	0.0179033
6-azauracil	376	Repeatibility	0.159736	0.0904458
6-azauracil	376	A ○ A	0.111889	0.0987188
6-azauracil	376	Q ○ A	0.0151693	0.0421654
6-azauracil	376	Q ○ Q	0.00404776	0.00910557
6-azauracil	376	A	0.0830745	0.0262221
6-azauracil	376	Q	0.289892	0.135338
Cadmium Chloride	376	Residual	0.241864	0.0128977
Cadmium Chloride	376	Repeatibility	0.225652	0.0731642
Cadmium Chloride	376	A ○ A	1.34637e-10	0.0762434
Cadmium Chloride	376	Q ○ A	1.3598e-09	0.0323594
Cadmium Chloride	376	Q ○ Q	1.34637e-10	0.00653325
Cadmium Chloride	376	A	0.136049	0.0308752
Cadmium Chloride	376	Q	0.396434	0.182962
Caffeine	376	Residual	0.116483	0.00621261
Caffeine	376	Repeatibility	0.231904	0.0739334
Caffeine	376	A ○ A	0.0660915	0.0824869
Caffeine	376	Q ○ A	4.49899e-06	0.0439778
Caffeine	376	Q ○ Q	0.0217784	0.0130982
Caffeine	376	A	0.0696664	0.0222779
Caffeine	376	Q	0.494071	0.18581
Cobalt Chloride	376	Residual	0.12134	0.00647636
Cobalt Chloride	376	Repeatibility	0.365935	0.099685
Cobalt Chloride	376	A ○ A	0.0263031	0.104511
Cobalt Chloride	376	Q ○ A	0.0061266	0.0394415
Cobalt Chloride	376	Q ○ Q	1.68223e-05	0.00749165
Cobalt Chloride	376	A	0.25504	0.050619
Cobalt Chloride	376	Q	0.225239	0.120699
Congo Red	376	Residual	0.339814	0.0180965
Congo Red	376	Repeatibility	0.290114	0.0982212
Congo Red	376	A ○ A	0.0513063	0.102832
Congo Red	376	Q ○ A	1.36539e-10	0.0387692
Congo Red	376	Q ○ Q	0.00259741	0.00759076
Congo Red	376	A	0.045334	0.0212234
Congo Red	376	Q	0.270835	0.139828
Copper Sulfate	376	Residual	0.0212635	0.00114477
Copper Sulfate	376	Repeatibility	0.185014	0.047908
Copper Sulfate	376	A ○ A	5.90937e-05	0.0470598
Copper Sulfate	376	Q ○ A	0.0974843	0.0203442
Copper Sulfate	376	Q ○ Q	0.00825972	0.0112944
Copper Sulfate	376	A	0.0252144	0.0105647
Copper Sulfate	376	Q	0.662705	0.543924
Diamide	376	Residual	0.326058	0.0173517
Diamide	376	Repeatibility	0.234609	0.0783808
Diamide	376	A ○ A	0.000138198	0.08463
Diamide	376	Q ○ A	2.29832e-06	0.041761
Diamide	376	Q ○ Q	0.00672914	0.0102581
Diamide	376	A	0.0434271	0.0187129
Diamide	376	Q	0.389036	0.15732
EGTA	376	Residual	0.236539	0.0125884
EGTA	376	Repeatibility	0.101549	0.0714342
EGTA	376	A ○ A	0.000166345	0.0802521
EGTA	376	Q ○ A	0.132829	0.0490646
EGTA	376	Q ○ Q	9.03891e-06	0.0124818
EGTA	376	A	0.133259	0.0308143
EGTA	376	Q	0.395649	0.146898
EtOH	376	Residual	0.27101	0.0145298
EtOH	376	Repeatibility	0.175611	0.0761852
EtOH	376	A ○ A	4.00792e-10	0.0793866
EtOH	376	Q ○ A	0.0402359	0.0331435
EtOH	376	Q ○ Q	0.00914105	0.00900133
EtOH	376	A	0.166654	0.0352275
EtOH	376	Q	0.337348	0.162734
EtOH Glu	376	Residual	0.244342	0.0130299
EtOH Glu	376	Repeatibility	0.167692	0.0743174
EtOH Glu	376	A ○ A	0.0761852	0.0808483
EtOH Glu	376	Q ○ A	0.0030601	0.0350481
EtOH Glu	376	Q ○ Q	0.0187796	0.010971
EtOH Glu	376	A	0.0538383	0.0194545
EtOH Glu	376	Q	0.436103	0.190358
Fluconazole	376	Residual	0.15603	0.00831573
Fluconazole	376	Repeatibility	0.10827	0.0765817
Fluconazole	376	A ○ A	0.180448	0.0862257
Fluconazole	376	Q ○ A	0.0161278	0.0380008
Fluconazole	376	Q ○ Q	0.00309153	0.0083157
Fluconazole	376	A	0.107138	0.0275854
Fluconazole	376	Q	0.428895	0.188507
Formamide	376	Residual	0.540103	0.0287748
Formamide	376	Repeatibility	0.143712	0.0888414
Formamide	376	A ○ A	5.38667e-10	0.0955846
Formamide	376	Q ○ A	0.0320549	0.0451442
Formamide	376	Q ○ Q	8.81732e-10	0.00956063
Formamide	376	A	0.0676324	0.0238197
Formamide	376	Q	0.216498	0.0978319
Fructose	376	Residual	0.20675	0.0110104
Fructose	376	Repeatibility	0.208898	0.0644634
Fructose	376	A ○ A	0.000113681	0.0703797
Fructose	376	Q ○ A	1.57941e-05	0.0354739
Fructose	376	Q ○ Q	0.0303154	0.0125637
Fructose	376	A	0.0426204	0.0165972
Fructose	376	Q	0.511288	0.197627
Galactose	376	Residual	0.279514	0.0149466
Galactose	376	Repeatibility	0.0733476	0.0894385
Galactose	376	A ○ A	0.160557	0.100068
Galactose	376	Q ○ A	0.101352	0.0462375
Galactose	376	Q ○ Q	0.0118826	0.011938
Galactose	376	A	0.0784043	0.0254245
Galactose	376	Q	0.294942	0.144167
Glycerol	376	Residual	0.437004	0.024086
Glycerol	376	Repeatibility	0.161168	0.0862134
Glycerol	376	A ○ A	9.70593e-06	0.0885244
Glycerol	376	Q ○ A	0.0310802	0.0355737
Glycerol	376	Q ○ Q	7.68591e-07	0.00673846
Glycerol	376	A	0.104043	0.0282832
Glycerol	376	Q	0.266694	0.138412
Lactate	376	Residual	0.40033	0.0215781
Lactate	376	Repeatibility	0.0792273	0.0596386
Lactate	376	A ○ A	2.48621e-10	0.0656463
Lactate	376	Q ○ A	0.0083013	0.0354342
Lactate	376	Q ○ Q	4.41708e-06	0.00842684
Lactate	376	A	0.0624738	0.0189399
Lactate	376	Q	0.449664	0.168861
Lithium Chloride	376	Residual	0.0435078	0.00232044
Lithium Chloride	376	Repeatibility	0.0748254	0.0244479
Lithium Chloride	376	A ○ A	9.42176e-08	0.0278697
Lithium Chloride	376	Q ○ A	7.66402e-08	0.0157165
Lithium Chloride	376	Q ○ Q	0.0168682	0.00607767
Lithium Chloride	376	A	0.0860157	0.015686
Lithium Chloride	376	Q	0.778783	0.26093
Magnesium Chloride	376	Residual	0.234434	0.0124762
Magnesium Chloride	376	Repeatibility	0.213541	0.0686515
Magnesium Chloride	376	A ○ A	0.00012038	0.0757502
Magnesium Chloride	376	Q ○ A	0.0125979	0.0402273
Magnesium Chloride	376	Q ○ Q	0.00876325	0.0107992
Magnesium Chloride	376	A	0.044695	0.0176898
Magnesium Chloride	376	Q	0.485849	0.182066
Maltose	376	Residual	0.0478765	0.0025608
Maltose	376	Repeatibility	0.134577	0.044579
Maltose	376	A ○ A	0.0420656	0.0470466
Maltose	376	Q ○ A	0.0150681	0.0197811
Maltose	376	Q ○ Q	0.0124573	0.00668539
Maltose	376	A	0.0591226	0.0154719
Maltose	376	Q	0.688833	0.327469
Manganese Sulfate	376	Residual	0.0589124	0.00313113
Manganese Sulfate	376	Repeatibility	0.121202	0.0426809
Manganese Sulfate	376	A ○ A	0.0314273	0.0528889
Manganese Sulfate	376	Q ○ A	0.0218025	0.0332019
Manganese Sulfate	376	Q ○ Q	5.39214e-11	0.00900245
Manganese Sulfate	376	A	0.0769867	0.0185459
Manganese Sulfate	376	Q	0.689669	0.222937
Mannose	376	Residual	0.247589	0.0132213
Mannose	376	Repeatibility	0.199837	0.0806084
Mannose	376	A ○ A	0.0416248	0.0869373
Mannose	376	Q ○ A	0.0387006	0.0408894
Mannose	376	Q ○ Q	0.00691923	0.00992818
Mannose	376	A	0.0697737	0.0228548
Mannose	376	Q	0.395555	0.173683
Methotrexate	376	Residual	0.290171	0.0156143
Methotrexate	376	Repeatibility	0.348005	0.104021
Methotrexate	376	A ○ A	0.000254894	0.109093
Methotrexate	376	Q ○ A	0.0259952	0.045741
Methotrexate	376	Q ○ Q	1.97942e-05	0.0089651
Methotrexate	376	A	0.100059	0.0308131
Methotrexate	376	Q	0.235495	0.117182
Neomycin	376	Residual	0.249974	0.0133838
Neomycin	376	Repeatibility	0.0621401	0.0707149
Neomycin	376	A ○ A	0.118839	0.0808437
Neomycin	376	Q ○ A	0.0462463	0.0402252
Neomycin	376	Q ○ Q	0.00927028	0.0102213
Neomycin	376	A	0.0920651	0.0247415
Neomycin	376	Q	0.421466	0.177376
Paraquat	376	Residual	0.0650016	0.0034718
Paraquat	376	Repeatibility	0.167364	0.050133
Paraquat	376	A ○ A	0.00516136	0.053845
Paraquat	376	Q ○ A	0.038497	0.0291248
Paraquat	376	Q ○ Q	0.0101477	0.0083951
Paraquat	376	A	0.0573084	0.0165079
Paraquat	376	Q	0.65652	0.244737
Raffinose	376	Residual	0.137762	0.00740364
Raffinose	376	Repeatibility	0.206066	0.0613015
Raffinose	376	A ○ A	1.78861e-10	0.0660436
Raffinose	376	Q ○ A	0.0256822	0.0324041
Raffinose	376	Q ○ Q	1.13466e-08	0.00717418
Raffinose	376	A	0.0782537	0.0212613
Raffinose	376	Q	0.552237	0.230065
SDS	376	Residual	0.136611	0.0072658
SDS	376	Repeatibility	0.215982	0.0794524
SDS	376	A ○ A	2.4044e-11	0.0884933
SDS	376	Q ○ A	0.0715726	0.0480313
SDS	376	Q ○ Q	0.0385846	0.0169178
SDS	376	A	0.191915	0.0397294
SDS	376	Q	0.345335	0.143799
Sorbitol	376	Residual	0.20285	0.0108178
Sorbitol	376	Repeatibility	0.177502	0.0714411
Sorbitol	376	A ○ A	0.0294714	0.0806756
Sorbitol	376	Q ○ A	0.0420746	0.0449799
Sorbitol	376	Q ○ Q	0.013417	0.0126575
Sorbitol	376	A	0.0656098	0.0213411
Sorbitol	376	Q	0.469075	0.171481
Sucrose	376	Residual	0.266815	0.0149374
Sucrose	376	Repeatibility	0.166346	0.0672913
Sucrose	376	A ○ A	1.1102e-05	0.0744918
Sucrose	376	Q ○ A	0.0414913	0.0400937
Sucrose	376	Q ○ Q	0.00510491	0.010083
Sucrose	376	A	0.0209693	0.013459
Sucrose	376	Q	0.499263	0.192364
Trehalose	376	Residual	0.28563	0.0152753
Trehalose	376	Repeatibility	0.384664	0.123543
Trehalose	376	A ○ A	0.105344	0.127137
Trehalose	376	Q ○ A	0.0440712	0.0373038
Trehalose	376	Q ○ Q	0.00088193	0.0058218
Trehalose	376	A	0.0179	0.0192469
Trehalose	376	Q	0.161509	0.117344
Tunicamycin	376	Residual	0.163973	0.008922
Tunicamycin	376	Repeatibility	0.102554	0.0536467
Tunicamycin	376	A ○ A	0.0461125	0.0645528
Tunicamycin	376	Q ○ A	0.00478921	0.0389831
Tunicamycin	376	Q ○ Q	0.00701144	0.0104403
Tunicamycin	376	A	0.14094	0.0286635
Tunicamycin	376	Q	0.534619	0.184906
Xylose	376	Residual	0.34341	0.0184906
Xylose	376	Repeatibility	0.390376	0.117717
Xylose	376	A ○ A	3.20837e-10	0.116345
Xylose	376	Q ○ A	0.0687662	0.033516
Xylose	376	Q ○ Q	3.20837e-10	0.00488185
Xylose	376	A	0.0431843	0.0228103
Xylose	376	Q	0.154263	0.129004
YNB	376	Residual	0.487851	0.0259107
YNB	376	Repeatibility	0.164397	0.108361
YNB	376	A ○ A	0.111933	0.111308
YNB	376	Q ○ A	0.0225251	0.0313163
YNB	376	Q ○ Q	7.3455e-06	0.00463537
YNB	376	A	0.11799	0.0331225
YNB	376	Q	0.0952965	0.0719473
YNB ph3	376	Residual	0.802619	0.0426772
YNB ph3	376	Repeatibility	0.0768057	0.0934167
YNB ph3	376	A ○ A	1.93554e-09	0.0896519
YNB ph3	376	Q ○ A	0.00156168	0.0194486
YNB ph3	376	Q ○ Q	1.99781e-08	0.00275197
YNB ph3	376	A	0.041932	0.0191455
YNB ph3	376	Q	0.0770816	0.0654805
YNB ph8	376	Residual	0.694038	0.0369868
YNB ph8	376	Repeatibility	0.0108179	0.0773256
YNB ph8	376	A ○ A	0.0335692	0.0767953
YNB ph8	376	Q ○ A	5.58401e-05	0.0305918
YNB ph8	376	Q ○ Q	2.31059e-06	0.00595728
YNB ph8	376	A	0.0368916	0.0165243
YNB ph8	376	Q	0.224626	0.109268
YPD	376	Residual	0.267409	0.014212
YPD	376	Repeatibility	0.226052	0.0749938
YPD	376	A ○ A	4.57711e-09	0.0798024
YPD	376	Q ○ A	0.010282	0.0363322
YPD	376	Q ○ Q	0.00497216	0.00856083
YPD	376	A	0.0768829	0.0231321
YPD	376	Q	0.414402	0.18179
YPD 15C	376	Residual	0.332864	0.0177138
YPD 15C	376	Repeatibility	0.101463	0.0800582
YPD 15C	376	A ○ A	0.126772	0.0905234
YPD 15C	376	Q ○ A	0.00538438	0.0427579
YPD 15C	376	Q ○ Q	0.0159617	0.011726
YPD 15C	376	A	0.0619953	0.0217718
YPD 15C	376	Q	0.35556	0.150257
YPD 37C	376	Residual	0.146806	0.00789927
YPD 37C	376	Repeatibility	0.120092	0.0506111
YPD 37C	376	A ○ A	0.0493107	0.0517946
YPD 37C	376	Q ○ A	0.0259528	0.0157939
YPD 37C	376	Q ○ Q	4.16467e-11	0.00238333
YPD 37C	376	A	0.02426	0.0107786
YPD 37C	376	Q	0.633578	0.449607
Zeocin	376	Residual	0.0946803	0.00503567
Zeocin	376	Repeatibility	0.197162	0.0655025
Zeocin	376	A ○ A	0.0694753	0.0734897
Zeocin	376	Q ○ A	3.88744e-05	0.0389873
Zeocin	376	Q ○ Q	0.0340559	0.013596
Zeocin	376	A	0.051461	0.0181915
Zeocin	376	Q	0.553127	0.206584
6-azauracil	B	Residual	0.262486	0.0120788
6-azauracil	B	Repeatibility	0.0892657	0.0264286
6-azauracil	B	A ○ A	0.16725	0.0452777
6-azauracil	B	Q ○ A	0.0325294	0.0372444
6-azauracil	B	Q ○ Q	1.85544e-06	0.00878859
6-azauracil	B	A	0.0822238	0.0214149
6-azauracil	B	Q	0.366243	0.148899
Cadmium Chloride	B	Residual	0.282587	0.0130387
Cadmium Chloride	B	Repeatibility	0.0272994	0.0205442
Cadmium Chloride	B	A ○ A	0.0975679	0.0416667
Cadmium Chloride	B	Q ○ A	0.0186728	0.0409249
Cadmium Chloride	B	Q ○ Q	0.012315	0.0131868
Cadmium Chloride	B	A	0.083736	0.0199671
Cadmium Chloride	B	Q	0.477822	0.144029
Caffeine	B	Residual	0.122544	0.0056627
Caffeine	B	Repeatibility	0.108039	0.0183622
Caffeine	B	A ○ A	0.0445611	0.0264387
Caffeine	B	Q ○ A	0.0324997	0.0226998
Caffeine	B	Q ○ Q	0.0195042	0.00897468
Caffeine	B	A	0.0264438	0.00955161
Caffeine	B	Q	0.646408	0.231838
Cobalt Chloride	B	Residual	0.0818887	0.00376871
Cobalt Chloride	B	Repeatibility	0.0713642	0.0130461
Cobalt Chloride	B	A ○ A	6.44668e-11	0.0268129
Cobalt Chloride	B	Q ○ A	0.0841135	0.0301922
Cobalt Chloride	B	Q ○ Q	6.44668e-11	0.00971346
Cobalt Chloride	B	A	0.0762782	0.0160667
Cobalt Chloride	B	Q	0.686355	0.194989
Congo Red	B	Residual	0.229391	0.0105558
Congo Red	B	Repeatibility	0.0591717	0.0212445
Congo Red	B	A ○ A	0.137429	0.0362845
Congo Red	B	Q ○ A	0.0497811	0.0305101
Congo Red	B	Q ○ Q	0.000376842	0.00670097
Congo Red	B	A	0.0530738	0.0154601
Congo Red	B	Q	0.470776	0.19596
Diamide	B	Residual	0.0948924	0.00436647
Diamide	B	Repeatibility	0.0244228	0.0086803
Diamide	B	A ○ A	0.067868	0.015089
Diamide	B	Q ○ A	2.4589e-07	0.0118711
Diamide	B	Q ○ Q	2.48825e-06	0.00277305
Diamide	B	A	0.0189568	0.00584449
Diamide	B	Q	0.793857	0.296542
EGTA	B	Residual	0.230525	0.0106129
EGTA	B	Repeatibility	0.0656792	0.0215698
EGTA	B	A ○ A	0.137071	0.0441767
EGTA	B	Q ○ A	1.62488e-05	0.0425506
EGTA	B	Q ○ Q	0.0179018	0.0137434
EGTA	B	A	0.0551581	0.0164205
EGTA	B	Q	0.493649	0.150737
EtOH	B	Residual	0.1721	0.0079188
EtOH	B	Repeatibility	0.0674325	0.0166212
EtOH	B	A ○ A	0.0290092	0.0249224
EtOH	B	Q ○ A	0.00883006	0.0220094
EtOH	B	Q ○ Q	0.0138894	0.00773583
EtOH	B	A	0.0952324	0.0186315
EtOH	B	Q	0.613506	0.19803
EtOH Glu	B	Residual	0.154448	0.00708966
EtOH Glu	B	Repeatibility	0.0947799	0.0192473
EtOH Glu	B	A ○ A	0.0954587	0.0317372
EtOH Glu	B	Q ○ A	0.00411254	0.0255684
EtOH Glu	B	Q ○ Q	3.11573e-06	0.00652631
EtOH Glu	B	A	0.0529143	0.0141709
EtOH Glu	B	Q	0.598283	0.212573
Fluconazole	B	Residual	0.0561419	0.00258519
Fluconazole	B	Repeatibility	0.0646651	0.0103051
Fluconazole	B	A ○ A	0.0095167	0.0132736
Fluconazole	B	Q ○ A	0.0500034	0.0122897
Fluconazole	B	Q ○ Q	0.0543479	0.0158604
Fluconazole	B	A	0.0339761	0.00815448
Fluconazole	B	Q	0.731349	0.346445
Formamide	B	Residual	0.669428	0.030801
Formamide	B	Repeatibility	5.63022e-10	0.0377326
Formamide	B	A ○ A	0.140597	0.0444581
Formamide	B	Q ○ A	5.63022e-10	0.0289183
Formamide	B	Q ○ Q	0.00273138	0.00637678
Formamide	B	A	0.0131428	0.0105401
Formamide	B	Q	0.174101	0.0847311
Fructose	B	Residual	0.186316	0.00855654
Fructose	B	Repeatibility	0.0549501	0.0178898
Fructose	B	A ○ A	0.12064	0.0358161
Fructose	B	Q ○ A	0.0186862	0.0329902
Fructose	B	Q ○ Q	1.75812e-05	0.00921529
Fructose	B	A	0.0526145	0.0146122
Fructose	B	Q	0.566776	0.183501
Galactose	B	Residual	0.0389217	0.00178579
Galactose	B	Repeatibility	0.0641323	0.00825924
Galactose	B	A ○ A	0.00636464	0.0101288
Galactose	B	Q ○ A	3.42492e-11	0.00749959
Galactose	B	Q ○ Q	0.000299878	0.00173118
Galactose	B	A	0.0867795	0.0133926
Galactose	B	Q	0.803502	0.317922
Glycerol	B	Residual	0.24834	0.0114092
Glycerol	B	Repeatibility	0.0743912	0.0210468
Glycerol	B	A ○ A	0.0597862	0.0340384
Glycerol	B	Q ○ A	2.2579e-10	0.0310827
Glycerol	B	Q ○ Q	2.2579e-10	0.00881962
Glycerol	B	A	0.0505549	0.0141913
Glycerol	B	Q	0.566928	0.173651
Lactate	B	Residual	0.26453	0.0121513
Lactate	B	Repeatibility	0.0265158	0.0175765
Lactate	B	A ○ A	0.00588771	0.0276689
Lactate	B	Q ○ A	0.0491735	0.029067
Lactate	B	Q ○ Q	1.21918e-05	0.00896809
Lactate	B	A	0.0441489	0.0122164
Lactate	B	Q	0.609732	0.175744
Lithium Chloride	B	Residual	0.0714824	0.00328822
Lithium Chloride	B	Repeatibility	0.118117	0.0156398
Lithium Chloride	B	A ○ A	6.35447e-11	0.0241821
Lithium Chloride	B	Q ○ A	0.0265757	0.0238129
Lithium Chloride	B	Q ○ Q	0.0418695	0.0105599
Lithium Chloride	B	A	0.0345722	0.0101425
Lithium Chloride	B	Q	0.707383	0.22669
Magnesium Chloride	B	Residual	0.235322	0.0108177
Magnesium Chloride	B	Repeatibility	0.0829647	0.0238027
Magnesium Chloride	B	A ○ A	0.128235	0.0416756
Magnesium Chloride	B	Q ○ A	0.0322078	0.036717
Magnesium Chloride	B	Q ○ Q	1.39884e-05	0.00942692
Magnesium Chloride	B	A	0.0905536	0.021669
Magnesium Chloride	B	Q	0.430703	0.15779
Maltose	B	Residual	0.0356313	0.00163654
Maltose	B	Repeatibility	0.0504651	0.00791382
Maltose	B	A ○ A	1.48305e-05	0.0130162
Maltose	B	Q ○ A	0.0379794	0.013382
Maltose	B	Q ○ Q	0.0704892	0.0125473
Maltose	B	A	0.0645255	0.0117021
Maltose	B	Q	0.740895	0.251116
Manganese Sulfate	B	Residual	0.116324	0.00533694
Manganese Sulfate	B	Repeatibility	0.0591368	0.0143661
Manganese Sulfate	B	A ○ A	0.100185	0.0352204
Manganese Sulfate	B	Q ○ A	1.21107e-05	0.0362837
Manganese Sulfate	B	Q ○ Q	0.00968658	0.0116679
Manganese Sulfate	B	A	0.126906	0.0238286
Manganese Sulfate	B	Q	0.58775	0.164164
Mannose	B	Residual	0.217443	0.00997604
Mannose	B	Repeatibility	0.0660422	0.020724
Mannose	B	A ○ A	0.128307	0.0395127
Mannose	B	Q ○ A	0.0136663	0.0353657
Mannose	B	Q ○ Q	8.50155e-06	0.00999181
Mannose	B	A	0.059517	0.0163597
Mannose	B	Q	0.515017	0.167561
Methotrexate	B	Residual	0.123939	0.00570934
Methotrexate	B	Repeatibility	0.104054	0.0170938
Methotrexate	B	A ○ A	1.8083e-07	0.0248931
Methotrexate	B	Q ○ A	0.0604116	0.0242799
Methotrexate	B	Q ○ Q	1.30789e-05	0.00694236
Methotrexate	B	A	0.0220125	0.00842629
Methotrexate	B	Q	0.68957	0.221065
Neomycin	B	Residual	0.192071	0.0090609
Neomycin	B	Repeatibility	0.0894869	0.0217718
Neomycin	B	A ○ A	0.0461837	0.0402538
Neomycin	B	Q ○ A	0.0259418	0.0399973
Neomycin	B	Q ○ Q	0.050685	0.0161061
Neomycin	B	A	0.186144	0.0331535
Neomycin	B	Q	0.409487	0.129578
Paraquat	B	Residual	0.0502159	0.00230999
Paraquat	B	Repeatibility	0.0730971	0.0107583
Paraquat	B	A ○ A	0.0254005	0.0204154
Paraquat	B	Q ○ A	0.00784165	0.0211946
Paraquat	B	Q ○ Q	0.0217973	0.00811968
Paraquat	B	A	0.0390534	0.00973522
Paraquat	B	Q	0.782594	0.215945
Raffinose	B	Residual	0.0815965	0.0037475
Raffinose	B	Repeatibility	0.0627748	0.011559
Raffinose	B	A ○ A	1.34551e-06	0.0184836
Raffinose	B	Q ○ A	0.0341819	0.0187621
Raffinose	B	Q ○ Q	0.00541979	0.00651352
Raffinose	B	A	0.156644	0.0239198
Raffinose	B	Q	0.659382	0.187106
SDS	B	Residual	0.20578	0.0096571
SDS	B	Repeatibility	0.00800934	0.014589
SDS	B	A ○ A	0.112606	0.0238893
SDS	B	Q ○ A	3.56034e-05	0.01746
SDS	B	Q ○ Q	0.00232809	0.00422897
SDS	B	A	0.0545444	0.012954
SDS	B	Q	0.616696	0.260273
Sorbitol	B	Residual	0.170044	0.00786251
Sorbitol	B	Repeatibility	0.220143	0.031571
Sorbitol	B	A ○ A	0.0100883	0.0430064
Sorbitol	B	Q ○ A	0.0994295	0.0392883
Sorbitol	B	Q ○ Q	0.000562894	0.0102332
Sorbitol	B	A	0.0751417	0.0206242
Sorbitol	B	Q	0.42459	0.155771
Sucrose	B	Residual	0.157229	0.00753701
Sucrose	B	Repeatibility	0.0475277	0.0137824
Sucrose	B	A ○ A	0.0373509	0.0193418
Sucrose	B	Q ○ A	3.19657e-11	0.0160338
Sucrose	B	Q ○ Q	0.00272158	0.0045149
Sucrose	B	A	0.0187089	0.00670063
Sucrose	B	Q	0.736462	0.239826
Trehalose	B	Residual	0.200605	0.00923215
Trehalose	B	Repeatibility	0.243302	0.0339545
Trehalose	B	A ○ A	0.0811357	0.0417523
Trehalose	B	Q ○ A	3.10126e-07	0.027866
Trehalose	B	Q ○ Q	3.12606e-10	0.00579284
Trehalose	B	A	0.0537389	0.0172195
Trehalose	B	Q	0.421219	0.192455
Tunicamycin	B	Residual	0.123211	0.00566704
Tunicamycin	B	Repeatibility	0.0608489	0.0139129
Tunicamycin	B	A ○ A	6.29194e-05	0.0276245
Tunicamycin	B	Q ○ A	0.064439	0.0310218
Tunicamycin	B	Q ○ Q	0.0112663	0.0107729
Tunicamycin	B	A	0.0638877	0.0146253
Tunicamycin	B	Q	0.676284	0.18542
Xylose	B	Residual	0.336661	0.0154606
Xylose	B	Repeatibility	0.228026	0.0372322
Xylose	B	A ○ A	0.0419033	0.0454755
Xylose	B	Q ○ A	4.37871e-10	0.0349822
Xylose	B	Q ○ Q	0.00548517	0.00911148
Xylose	B	A	0.0437899	0.0163086
Xylose	B	Q	0.344135	0.134521
YNB	B	Residual	0.491205	0.0225025
YNB	B	Repeatibility	0.0509213	0.0351761
YNB	B	A ○ A	0.179595	0.0510653
YNB	B	Q ○ A	0.0583694	0.0392188
YNB	B	Q ○ Q	0.0103541	0.0106421
YNB	B	A	0.0241449	0.0135179
YNB	B	Q	0.18541	0.0863689
YNB ph3	B	Residual	0.675295	0.0309358
YNB ph3	B	Repeatibility	0.153502	0.0487134
YNB ph3	B	A ○ A	0.074956	0.0438895
YNB ph3	B	Q ○ A	0.00310035	0.0142367
YNB ph3	B	Q ○ Q	1.75825e-09	0.0019778
YNB ph3	B	A	0.0742858	0.0222183
YNB ph3	B	Q	0.0188616	0.020907
YNB ph8	B	Residual	0.748194	0.0344341
YNB ph8	B	Repeatibility	0.0324433	0.0398987
YNB ph8	B	A ○ A	0.0322027	0.0390884
YNB ph8	B	Q ○ A	3.74608e-06	0.0235289
YNB ph8	B	Q ○ Q	1.26533e-09	0.00458108
YNB ph8	B	A	0.0158199	0.0106351
YNB ph8	B	Q	0.171337	0.0881578
YPD	B	Residual	0.240572	0.0110317
YPD	B	Repeatibility	0.0571861	0.021445
YPD	B	A ○ A	0.167993	0.0391797
YPD	B	Q ○ A	4.86659e-05	0.0328864
YPD	B	Q ○ Q	1.12512e-07	0.00815892
YPD	B	A	0.0493993	0.0149837
YPD	B	Q	0.484801	0.175558
YPD 15C	B	Residual	0.342853	0.0157375
YPD 15C	B	Repeatibility	0.218006	0.0394594
YPD 15C	B	A ○ A	0.107334	0.0515126
YPD 15C	B	Q ○ A	3.64575e-10	0.0381046
YPD 15C	B	Q ○ Q	0.000908664	0.00880225
YPD 15C	B	A	0.0587514	0.0196099
YPD 15C	B	Q	0.272148	0.111748
Zeocin	B	Residual	0.161117	0.00740291
Zeocin	B	Repeatibility	0.110851	0.0188879
Zeocin	B	A ○ A	0.0103141	0.0304191
Zeocin	B	Q ○ A	0.0133021	0.0302385
Zeocin	B	Q ○ Q	1.65116e-08	0.0097695
Zeocin	B	A	0.0885668	0.0187454
Zeocin	B	Q	0.615849	0.173086
6-azauracil	377	Residual	0.300307	0.0146775
6-azauracil	377	Repeatibility	0.220187	0.0679517
6-azauracil	377	A ○ A	1.76836e-05	0.0693692
6-azauracil	377	Q ○ A	0.0358935	0.029317
6-azauracil	377	Q ○ Q	0.064304	0.0224969
6-azauracil	377	A	0.0627229	0.0196469
6-azauracil	377	Q	0.316567	0.16213
Cadmium Chloride	377	Residual	0.21925	0.0108218
Cadmium Chloride	377	Repeatibility	0.207975	0.0605529
Cadmium Chloride	377	A ○ A	0.000128565	0.0626883
Cadmium Chloride	377	Q ○ A	0.0273052	0.0321254
Cadmium Chloride	377	Q ○ Q	0.00772491	0.00858529
Cadmium Chloride	377	A	0.113524	0.0259223
Cadmium Chloride	377	Q	0.424093	0.171419
Caffeine	377	Residual	0.11113	0.00549357
Caffeine	377	Repeatibility	0.155358	0.0511706
Caffeine	377	A ○ A	0.0357958	0.0551726
Caffeine	377	Q ○ A	0.0548228	0.0297395
Caffeine	377	Q ○ Q	0.0184658	0.0100149
Caffeine	377	A	0.0707042	0.0186067
Caffeine	377	Q	0.553724	0.207917
Cobalt Chloride	377	Residual	0.107128	0.00528022
Cobalt Chloride	377	Repeatibility	0.227769	0.0596064
Cobalt Chloride	377	A ○ A	0.0577779	0.0628543
Cobalt Chloride	377	Q ○ A	0.0176013	0.0258676
Cobalt Chloride	377	Q ○ Q	0.00797086	0.00707386
Cobalt Chloride	377	A	0.0726989	0.0199603
Cobalt Chloride	377	Q	0.509054	0.236811
Congo Red	377	Residual	0.267208	0.0130526
Congo Red	377	Repeatibility	0.210767	0.0633013
Congo Red	377	A ○ A	0.00428476	0.0722999
Congo Red	377	Q ○ A	0.0211385	0.0335897
Congo Red	377	Q ○ Q	0.0274699	0.0119283
Congo Red	377	A	0.064343	0.0195621
Congo Red	377	Q	0.404789	0.169674
Copper Sulfate	377	Residual	0.13839	0.0067527
Copper Sulfate	377	Repeatibility	0.305411	0.0751212
Copper Sulfate	377	A ○ A	0.0657438	0.0788916
Copper Sulfate	377	Q ○ A	0.0119442	0.0344863
Copper Sulfate	377	Q ○ Q	0.0407886	0.0153778
Copper Sulfate	377	A	0.0534199	0.0194065
Copper Sulfate	377	Q	0.384302	0.175935
Diamide	377	Residual	0.271065	0.0132946
Diamide	377	Repeatibility	0.194152	0.0751501
Diamide	377	A ○ A	0.040548	0.0769147
Diamide	377	Q ○ A	0.111538	0.0348716
Diamide	377	Q ○ Q	0.0136042	0.0104028
Diamide	377	A	0.0562037	0.0195212
Diamide	377	Q	0.312889	0.170683
EGTA	377	Residual	0.164953	0.00805804
EGTA	377	Repeatibility	0.22106	0.0583473
EGTA	377	A ○ A	1.44235e-05	0.0663213
EGTA	377	Q ○ A	0.0371778	0.0415269
EGTA	377	Q ○ Q	0.0322332	0.0139921
EGTA	377	A	0.0425463	0.016095
EGTA	377	Q	0.502015	0.171764
EtOH	377	Residual	0.253928	0.0123901
EtOH	377	Repeatibility	0.207546	0.0743939
EtOH	377	A ○ A	0.0408768	0.0811756
EtOH	377	Q ○ A	0.0691946	0.0406966
EtOH	377	Q ○ Q	0.0152058	0.0115138
EtOH	377	A	0.0977228	0.0261037
EtOH	377	Q	0.315526	0.14001
EtOH Glu	377	Residual	0.266521	0.0130417
EtOH Glu	377	Repeatibility	0.289825	0.0738652
EtOH Glu	377	A ○ A	1.4524e-06	0.075344
EtOH Glu	377	Q ○ A	0.0311127	0.0278091
EtOH Glu	377	Q ○ Q	0.0292369	0.0152641
EtOH Glu	377	A	0.050668	0.0185767
EtOH Glu	377	Q	0.332635	0.195652
Fluconazole	377	Residual	0.134937	0.00665781
Fluconazole	377	Repeatibility	0.120184	0.0504854
Fluconazole	377	A ○ A	0.0798517	0.0528071
Fluconazole	377	Q ○ A	0.0479284	0.0211695
Fluconazole	377	Q ○ Q	0.0620779	0.0233348
Fluconazole	377	A	0.0440247	0.0140582
Fluconazole	377	Q	0.510997	0.260132
Formamide	377	Residual	0.558219	0.0293532
Formamide	377	Repeatibility	0.114444	0.0934835
Formamide	377	A ○ A	0.12228	0.0968829
Formamide	377	Q ○ A	0.0215366	0.0280447
Formamide	377	Q ○ Q	0.00554949	0.00726443
Formamide	377	A	0.0862616	0.0264018
Formamide	377	Q	0.0917091	0.0688639
Fructose	377	Residual	0.305313	0.0149307
Fructose	377	Repeatibility	0.205358	0.0711276
Fructose	377	A ○ A	0.0617764	0.0752103
Fructose	377	Q ○ A	1.07903e-10	0.0356221
Fructose	377	Q ○ Q	0.0223148	0.0115493
Fructose	377	A	0.0607726	0.0202015
Fructose	377	Q	0.344465	0.145761
Galactose	377	Residual	0.0985874	0.00481337
Galactose	377	Repeatibility	0.323041	0.0622649
Galactose	377	A ○ A	3.78641e-08	0.0613567
Galactose	377	Q ○ A	0.0115941	0.019405
Galactose	377	Q ○ Q	0.0611602	0.0303548
Galactose	377	A	0.0458939	0.0160029
Galactose	377	Q	0.459724	0.293543
Glycerol	377	Residual	0.269485	0.0131568
Glycerol	377	Repeatibility	0.308927	0.0858067
Glycerol	377	A ○ A	5.15001e-09	0.0862666
Glycerol	377	Q ○ A	0.0801332	0.0324062
Glycerol	377	Q ○ Q	0.000854995	0.00571115
Glycerol	377	A	0.122432	0.0306474
Glycerol	377	Q	0.218168	0.142355
Lactate	377	Residual	0.359705	0.017551
Lactate	377	Repeatibility	0.211425	0.0694614
Lactate	377	A ○ A	3.59569e-07	0.0717922
Lactate	377	Q ○ A	6.13261e-07	0.0331326
Lactate	377	Q ○ Q	0.0258714	0.0116614
Lactate	377	A	0.123321	0.0286817
Lactate	377	Q	0.279677	0.124855
Lithium Chloride	377	Residual	0.0652269	0.00321901
Lithium Chloride	377	Repeatibility	0.170175	0.0454645
Lithium Chloride	377	A ○ A	3.58047e-11	0.049583
Lithium Chloride	377	Q ○ A	0.054254	0.0318465
Lithium Chloride	377	Q ○ Q	0.0494301	0.0138532
Lithium Chloride	377	A	0.047411	0.0146655
Lithium Chloride	377	Q	0.613503	0.202895
Magnesium Chloride	377	Residual	0.240563	0.0149232
Magnesium Chloride	377	Repeatibility	0.170354	0.0806773
Magnesium Chloride	377	A ○ A	0.0360348	0.0883904
Magnesium Chloride	377	Q ○ A	0.153546	0.0400531
Magnesium Chloride	377	Q ○ Q	1.08394e-10	0.00794136
Magnesium Chloride	377	A	0.0803207	0.0241186
Magnesium Chloride	377	Q	0.319182	0.163864
Maltose	377	Residual	0.11977	0.0058441
Maltose	377	Repeatibility	0.227852	0.0640277
Maltose	377	A ○ A	0.0509829	0.0672673
Maltose	377	Q ○ A	0.0559591	0.032844
Maltose	377	Q ○ Q	0.0154586	0.0100664
Maltose	377	A	0.0491026	0.0171373
Maltose	377	Q	0.480875	0.203225
Manganese Sulfate	377	Residual	0.233186	0.0113715
Manganese Sulfate	377	Repeatibility	0.247727	0.0717938
Manganese Sulfate	377	A ○ A	0.0170371	0.0770652
Manganese Sulfate	377	Q ○ A	0.0566733	0.0384216
Manganese Sulfate	377	Q ○ Q	0.0225195	0.0123491
Manganese Sulfate	377	A	0.0534899	0.0192093
Manganese Sulfate	377	Q	0.369368	0.161861
Mannose	377	Residual	0.284997	0.0139686
Mannose	377	Repeatibility	0.158429	0.0660231
Mannose	377	A ○ A	8.29859e-11	0.0687879
Mannose	377	Q ○ A	0.099498	0.0344172
Mannose	377	Q ○ Q	0.0650025	0.0221064
Mannose	377	A	0.0771947	0.0215354
Mannose	377	Q	0.314879	0.152697
Methotrexate	377	Residual	0.144805	0.00730371
Methotrexate	377	Repeatibility	0.279995	0.0630624
Methotrexate	377	A ○ A	4.63797e-06	0.0639876
Methotrexate	377	Q ○ A	0.0176707	0.0289387
Methotrexate	377	Q ○ Q	0.0135669	0.00887076
Methotrexate	377	A	0.0695957	0.0200421
Methotrexate	377	Q	0.474362	0.206289
Neomycin	377	Residual	0.129816	0.00652639
Neomycin	377	Repeatibility	0.173151	0.049968
Neomycin	377	A ○ A	0.000394289	0.0352665
Neomycin	377	Q ○ A	0.0599193	0.0254525
Neomycin	377	Q ○ Q	0.0230549	0.0100054
Neomycin	377	A	0.0586594	0.0163873
Neomycin	377	Q	0.555006	0.251279
Paraquat	377	Residual	0.150329	0.00747323
Paraquat	377	Repeatibility	0.147684	0.0453495
Paraquat	377	A ○ A	4.68411e-11	0.0509561
Paraquat	377	Q ○ A	0.0334742	0.0331261
Paraquat	377	Q ○ Q	0.0255096	0.0114358
Paraquat	377	A	0.0485882	0.0149665
Paraquat	377	Q	0.594414	0.19202
Raffinose	377	Residual	0.154995	0.0076848
Raffinose	377	Repeatibility	0.301418	0.0667816
Raffinose	377	A ○ A	0.0120287	0.0575134
Raffinose	377	Q ○ A	5.22252e-08	0.0304796
Raffinose	377	Q ○ Q	0.0291892	0.012023
Raffinose	377	A	0.0616554	0.0195315
Raffinose	377	Q	0.440714	0.201242
SDS	377	Residual	0.225879	0.011028
SDS	377	Repeatibility	0.28125	0.0866757
SDS	377	A ○ A	6.44466e-06	0.0867093
SDS	377	Q ○ A	0.141266	0.0436846
SDS	377	Q ○ Q	0.0213483	0.0135397
SDS	377	A	0.116913	0.0303631
SDS	377	Q	0.213337	0.105614
Sorbitol	377	Residual	0.172694	0.00855215
Sorbitol	377	Repeatibility	0.33178	0.0768256
Sorbitol	377	A ○ A	0.0303286	0.0852054
Sorbitol	377	Q ○ A	3.14462e-10	0.0445943
Sorbitol	377	Q ○ Q	0.0209008	0.0130518
Sorbitol	377	A	0.085051	0.0252388
Sorbitol	377	Q	0.359245	0.141899
Sucrose	377	Residual	0.284448	0.0139028
Sucrose	377	Repeatibility	0.240716	0.0735784
Sucrose	377	A ○ A	5.72538e-05	0.0751813
Sucrose	377	Q ○ A	0.0794313	0.0339418
Sucrose	377	Q ○ Q	0.00559348	0.00793802
Sucrose	377	A	0.051558	0.0187529
Sucrose	377	Q	0.338196	0.172713
Trehalose	377	Residual	0.283704	0.014062
Trehalose	377	Repeatibility	0.358973	0.0860503
Trehalose	377	A ○ A	1.54534e-10	0.0876903
Trehalose	377	Q ○ A	0.0196382	0.0332894
Trehalose	377	Q ○ Q	0.0222504	0.0125762
Trehalose	377	A	0.0706341	0.0235706
Trehalose	377	Q	0.244801	0.135283
Tunicamycin	377	Residual	0.176602	0.00866168
Tunicamycin	377	Repeatibility	0.0445135	0.0508688
Tunicamycin	377	A ○ A	0.0904395	0.0604134
Tunicamycin	377	Q ○ A	0.073714	0.0397064
Tunicamycin	377	Q ○ Q	0.018461	0.012559
Tunicamycin	377	A	0.126149	0.0266101
Tunicamycin	377	Q	0.470121	0.154622
Xylose	377	Residual	0.319496	0.0157523
Xylose	377	Repeatibility	0.351517	0.0921083
Xylose	377	A ○ A	1.49287e-10	0.0932597
Xylose	377	Q ○ A	0.0464388	0.0347244
Xylose	377	Q ○ Q	0.0246765	0.0148004
Xylose	377	A	0.0880729	0.0269275
Xylose	377	Q	0.169799	0.102713
YNB	377	Residual	0.419256	0.0204455
YNB	377	Repeatibility	0.19307	0.0861173
YNB	377	A ○ A	0.0221445	0.0845553
YNB	377	Q ○ A	0.109868	0.0338187
YNB	377	Q ○ Q	2.15509e-10	0.00512574
YNB	377	A	0.124563	0.0307819
YNB	377	Q	0.131099	0.0866263
YNB ph3	377	Residual	0.701579	0.0342299
YNB ph3	377	Repeatibility	0.0713791	0.0740709
YNB ph3	377	A ○ A	0.000182002	0.0694419
YNB ph3	377	Q ○ A	0.0530599	0.0215902
YNB ph3	377	Q ○ Q	0.00124416	0.00378086
YNB ph3	377	A	0.0206551	0.0129458
YNB ph3	377	Q	0.151901	0.12566
YNB ph8	377	Residual	0.657955	0.0321021
YNB ph8	377	Repeatibility	0.166521	0.0806338
YNB ph8	377	A ○ A	0.000377859	0.0402492
YNB ph8	377	Q ○ A	0.0085032	0.018466
YNB ph8	377	Q ○ Q	4.82351e-10	0.00253403
YNB ph8	377	A	0.0338549	0.016234
YNB ph8	377	Q	0.132789	0.110561
YPD	377	Residual	0.338671	0.0165156
YPD	377	Repeatibility	0.26347	0.0794066
YPD	377	A ○ A	0.0131233	0.081724
YPD	377	Q ○ A	0.0479396	0.0322659
YPD	377	Q ○ Q	4.73365e-06	0.00606319
YPD	377	A	0.0610251	0.0209721
YPD	377	Q	0.275767	0.142323
YPD 15C	377	Residual	0.253253	0.0157282
YPD 15C	377	Repeatibility	0.229705	0.0812604
YPD 15C	377	A ○ A	1.27239e-10	0.0820121
YPD 15C	377	Q ○ A	0.11449	0.0388306
YPD 15C	377	Q ○ Q	0.0755249	0.0275508
YPD 15C	377	A	0.0487834	0.0193527
YPD 15C	377	Q	0.278244	0.143103
YPD 37C	377	Residual	0.327218	0.0159842
YPD 37C	377	Repeatibility	0.355481	0.0839368
YPD 37C	377	A ○ A	8.66546e-11	0.0878063
YPD 37C	377	Q ○ A	8.66546e-11	0.0408864
YPD 37C	377	Q ○ Q	0.0360634	0.0149985
YPD 37C	377	A	0.0211397	0.0156094
YPD 37C	377	Q	0.260098	0.114808
Zeocin	377	Residual	0.123522	0.00603792
Zeocin	377	Repeatibility	0.349477	0.0836704
Zeocin	377	A ○ A	1.3792e-11	0.0895077
Zeocin	377	Q ○ A	0.106147	0.0496234
Zeocin	377	Q ○ Q	0.01652	0.0140596
Zeocin	377	A	0.0647042	0.0229459
Zeocin	377	Q	0.339629	0.13858
6-azauracil	393	Residual	0.240474	0.0116153
6-azauracil	393	Repeatibility	0.325848	0.0720199
6-azauracil	393	A ○ A	1.2212e-10	0.0752257
6-azauracil	393	Q ○ A	0.0823771	0.0398123
6-azauracil	393	Q ○ Q	0.00977495	0.0109358
6-azauracil	393	A	0.0402289	0.0179654
6-azauracil	393	Q	0.301297	0.139001
Cadmium Chloride	393	Residual	0.078697	0.00379264
Cadmium Chloride	393	Repeatibility	0.0678688	0.0247234
Cadmium Chloride	393	A ○ A	0.0450548	0.0277459
Cadmium Chloride	393	Q ○ A	0.0277784	0.015377
Cadmium Chloride	393	Q ○ Q	0.0255264	0.00790011
Cadmium Chloride	393	A	0.00909134	0.00533391
Cadmium Chloride	393	Q	0.745983	0.305976
Caffeine	393	Residual	0.193137	0.00934464
Caffeine	393	Repeatibility	0.232685	0.0570911
Caffeine	393	A ○ A	0.0135315	0.0654001
Caffeine	393	Q ○ A	0.0389089	0.0418114
Caffeine	393	Q ○ Q	0.00454407	0.011827
Caffeine	393	A	0.136268	0.0306826
Caffeine	393	Q	0.380925	0.138025
Cobalt Chloride	393	Residual	0.150628	0.00725906
Cobalt Chloride	393	Repeatibility	0.159103	0.0408256
Cobalt Chloride	393	A ○ A	4.91404e-11	0.051987
Cobalt Chloride	393	Q ○ A	0.0305379	0.0449003
Cobalt Chloride	393	Q ○ Q	9.80941e-06	0.0152233
Cobalt Chloride	393	A	0.136288	0.028298
Cobalt Chloride	393	Q	0.523433	0.141046
Congo Red	393	Residual	0.315645	0.0152198
Congo Red	393	Repeatibility	0.324506	0.0759717
Congo Red	393	A ○ A	3.04323e-10	0.0779644
Congo Red	393	Q ○ A	0.0651104	0.0380828
Congo Red	393	Q ○ Q	0.00486554	0.00932265
Congo Red	393	A	0.0652779	0.0226111
Congo Red	393	Q	0.224596	0.110731
Copper Sulfate	393	Residual	0.0201501	0.00097059
Copper Sulfate	393	Repeatibility	0.132978	0.0219655
Copper Sulfate	393	A ○ A	0.00709273	0.0209484
Copper Sulfate	393	Q ○ A	0.0169081	0.00642151
Copper Sulfate	393	Q ○ Q	0.00220344	0.00393008
Copper Sulfate	393	A	0.0105852	0.00488893
Copper Sulfate	393	Q	0.810082	0.810637
Diamide	393	Residual	0.313602	0.0151384
Diamide	393	Repeatibility	0.394037	0.0802913
Diamide	393	A ○ A	1.32771e-10	0.0784268
Diamide	393	Q ○ A	0.0263922	0.0319494
Diamide	393	Q ○ Q	0.00746688	0.00834104
Diamide	393	A	0.0580292	0.0216859
Diamide	393	Q	0.200472	0.11119
EGTA	393	Residual	0.18896	0.00912711
EGTA	393	Repeatibility	0.236682	0.0585062
EGTA	393	A ○ A	0.0457141	0.0636878
EGTA	393	Q ○ A	0.0331656	0.0385622
EGTA	393	Q ○ Q	0.0153045	0.012078
EGTA	393	A	0.0444039	0.0169364
EGTA	393	Q	0.43577	0.158632
EtOH	393	Residual	0.331024	0.0159687
EtOH	393	Repeatibility	0.234012	0.0589226
EtOH	393	A ○ A	3.58263e-10	0.0610371
EtOH	393	Q ○ A	0.00935672	0.0316256
EtOH	393	Q ○ Q	0.0135374	0.00962979
EtOH	393	A	0.0563749	0.0187339
EtOH	393	Q	0.355695	0.149662
EtOH Glu	393	Residual	0.259619	0.0125746
EtOH Glu	393	Repeatibility	0.262373	0.0661041
EtOH Glu	393	A ○ A	0.0314969	0.0722368
EtOH Glu	393	Q ○ A	0.0723734	0.0401877
EtOH Glu	393	Q ○ Q	1.53102e-05	0.00969593
EtOH Glu	393	A	0.0150379	0.0126895
EtOH Glu	393	Q	0.359085	0.150092
Fluconazole	393	Residual	0.148469	0.00715086
Fluconazole	393	Repeatibility	0.101297	0.0340698
Fluconazole	393	A ○ A	1.77951e-06	0.0416218
Fluconazole	393	Q ○ A	0.0634071	0.0332239
Fluconazole	393	Q ○ Q	3.36711e-11	0.0106217
Fluconazole	393	A	0.0511785	0.0146102
Fluconazole	393	Q	0.635647	0.184172
Formamide	393	Residual	0.440597	0.0212612
Formamide	393	Repeatibility	0.13329	0.0522749
Formamide	393	A ○ A	7.36453e-05	0.0543127
Formamide	393	Q ○ A	0.00379098	0.0276867
Formamide	393	Q ○ Q	0.0221204	0.0101723
Formamide	393	A	0.0393308	0.0148289
Formamide	393	Q	0.360798	0.15107
Fructose	393	Residual	0.26667	0.0128717
Fructose	393	Repeatibility	0.200753	0.0519374
Fructose	393	A ○ A	0.0164613	0.0563212
Fructose	393	Q ○ A	0.014134	0.0319324
Fructose	393	Q ○ Q	0.0129081	0.00966606
Fructose	393	A	0.0337508	0.0140951
Fructose	393	Q	0.455322	0.17586
Galactose	393	Residual	0.0828992	0.00400437
Galactose	393	Repeatibility	0.140788	0.0323792
Galactose	393	A ○ A	0.0170337	0.033695
Galactose	393	Q ○ A	0.0339736	0.0167605
Galactose	393	Q ○ Q	0.00403217	0.00449944
Galactose	393	A	0.0322724	0.0103254
Galactose	393	Q	0.689001	0.32694
Glycerol	393	Residual	0.37325	0.0183294
Glycerol	393	Repeatibility	0.0948506	0.0577429
Glycerol	393	A ○ A	0.0865939	0.0648452
Glycerol	393	Q ○ A	0.0328464	0.036914
Glycerol	393	Q ○ Q	0.0166264	0.0113866
Glycerol	393	A	0.0396887	0.0158831
Glycerol	393	Q	0.356144	0.138804
Lactate	393	Residual	0.409454	0.0197607
Lactate	393	Repeatibility	0.0860402	0.058646
Lactate	393	A ○ A	0.0543706	0.0637837
Lactate	393	Q ○ A	0.0576621	0.0352769
Lactate	393	Q ○ Q	0.0165963	0.0110394
Lactate	393	A	0.0797022	0.0221085
Lactate	393	Q	0.296174	0.125863
Lithium Chloride	393	Residual	0.115087	0.00554007
Lithium Chloride	393	Repeatibility	0.0718631	0.0301988
Lithium Chloride	393	A ○ A	0.0644172	0.0408339
Lithium Chloride	393	Q ○ A	0.00307203	0.0322198
Lithium Chloride	393	Q ○ Q	0.0212131	0.0116169
Lithium Chloride	393	A	0.034323	0.0115276
Lithium Chloride	393	Q	0.690025	0.185237
Magnesium Chloride	393	Residual	0.261273	0.0125906
Magnesium Chloride	393	Repeatibility	0.212027	0.0519276
Magnesium Chloride	393	A ○ A	0.0117671	0.0582492
Magnesium Chloride	393	Q ○ A	0.0096165	0.0374998
Magnesium Chloride	393	Q ○ Q	0.00461203	0.0106077
Magnesium Chloride	393	A	0.0464576	0.0166353
Magnesium Chloride	393	Q	0.454247	0.156226
Maltose	393	Residual	0.394474	0.0190298
Maltose	393	Repeatibility	0.305116	0.0721225
Maltose	393	A ○ A	2.65496e-05	0.0692622
Maltose	393	Q ○ A	1.05778e-10	0.0266506
Maltose	393	Q ○ Q	0.0442401	0.0185851
Maltose	393	A	0.0683025	0.0220032
Maltose	393	Q	0.187841	0.104253
Manganese Sulfate	393	Residual	0.0778113	0.00374794
Manganese Sulfate	393	Repeatibility	0.132637	0.0344869
Manganese Sulfate	393	A ○ A	3.94016e-11	0.0396036
Manganese Sulfate	393	Q ○ A	0.0722837	0.0282971
Manganese Sulfate	393	Q ○ Q	0.00409108	0.00859168
Manganese Sulfate	393	A	0.0580625	0.0153189
Manganese Sulfate	393	Q	0.655114	0.216724
Mannose	393	Residual	0.270494	0.0130499
Mannose	393	Repeatibility	0.246429	0.064906
Mannose	393	A ○ A	0.0517228	0.069409
Mannose	393	Q ○ A	0.0274834	0.0351675
Mannose	393	Q ○ Q	0.0146466	0.010565
Mannose	393	A	0.0458665	0.0178592
Mannose	393	Q	0.343358	0.15068
Methotrexate	393	Residual	0.459871	0.0231838
Methotrexate	393	Repeatibility	0.0929466	0.0558863
Methotrexate	393	A ○ A	1.12561e-07	0.061161
Methotrexate	393	Q ○ A	0.024023	0.0380966
Methotrexate	393	Q ○ Q	0.020714	0.0124184
Methotrexate	393	A	0.107086	0.0261786
Methotrexate	393	Q	0.29536	0.110945
Neomycin	393	Residual	0.0705324	0.00340514
Neomycin	393	Repeatibility	0.0999873	0.0335728
Neomycin	393	A ○ A	0.0494664	0.0412716
Neomycin	393	Q ○ A	0.0347312	0.0282794
Neomycin	393	Q ○ Q	0.0314565	0.0109612
Neomycin	393	A	0.0602393	0.0154613
Neomycin	393	Q	0.653587	0.216184
Paraquat	393	Residual	0.0630221	0.00304083
Paraquat	393	Repeatibility	0.112065	0.0317572
Paraquat	393	A ○ A	0.0400978	0.0397543
Paraquat	393	Q ○ A	0.00997491	0.0311358
Paraquat	393	Q ○ Q	0.0355892	0.012318
Paraquat	393	A	0.0587388	0.0153469
Paraquat	393	Q	0.680513	0.189793
Raffinose	393	Residual	0.209624	0.0101191
Raffinose	393	Repeatibility	0.194563	0.0548595
Raffinose	393	A ○ A	0.00970895	0.0624934
Raffinose	393	Q ○ A	0.065233	0.0452695
Raffinose	393	Q ○ Q	0.0129738	0.0145892
Raffinose	393	A	0.0797064	0.0225963
Raffinose	393	Q	0.428191	0.138505
SDS	393	Residual	0.299306	0.0144317
SDS	393	Repeatibility	0.230189	0.066182
SDS	393	A ○ A	0.0821254	0.0741942
SDS	393	Q ○ A	0.0100326	0.034425
SDS	393	Q ○ Q	8.64606e-11	0.0106527
SDS	393	A	0.0541003	0.0197477
SDS	393	Q	0.324247	0.123603
Sorbitol	393	Residual	0.243577	0.0117387
Sorbitol	393	Repeatibility	0.390952	0.0749558
Sorbitol	393	A ○ A	0.0210473	0.0805444
Sorbitol	393	Q ○ A	2.98317e-07	0.0425975
Sorbitol	393	Q ○ Q	3.7515e-10	0.0102301
Sorbitol	393	A	0.0741668	0.0244695
Sorbitol	393	Q	0.270256	0.112112
Sucrose	393	Residual	0.421761	0.0213321
Sucrose	393	Repeatibility	0.184935	0.0652714
Sucrose	393	A ○ A	0.00452536	0.063241
Sucrose	393	Q ○ A	0.0516531	0.030244
Sucrose	393	Q ○ Q	1.84672e-08	0.0062649
Sucrose	393	A	0.0555207	0.0191067
Sucrose	393	Q	0.281605	0.144679
Trehalose	393	Residual	0.437854	0.0211807
Trehalose	393	Repeatibility	0.378141	0.0852541
Trehalose	393	A ○ A	0.0220554	0.0821735
Trehalose	393	Q ○ A	0.0108982	0.0242277
Trehalose	393	Q ○ Q	0.00178825	0.00476467
Trehalose	393	A	0.0268285	0.0165976
Trehalose	393	Q	0.122436	0.0892737
Tunicamycin	393	Residual	0.160706	0.00775338
Tunicamycin	393	Repeatibility	0.125855	0.0424892
Tunicamycin	393	A ○ A	0.0252358	0.0521118
Tunicamycin	393	Q ○ A	0.0309558	0.0386936
Tunicamycin	393	Q ○ Q	0.0197761	0.0131706
Tunicamycin	393	A	0.150659	0.0298071
Tunicamycin	393	Q	0.486813	0.151336
Xylose	393	Residual	0.563364	0.027406
Xylose	393	Repeatibility	0.262752	0.0820002
Xylose	393	A ○ A	0.0475244	0.080009
Xylose	393	Q ○ A	0.00577264	0.0257063
Xylose	393	Q ○ Q	0.0019815	0.00513436
Xylose	393	A	0.0250414	0.0157912
Xylose	393	Q	0.0935633	0.0620016
YNB	393	Residual	0.474732	0.0228274
YNB	393	Repeatibility	0.249058	0.0757176
YNB	393	A ○ A	5.24766e-10	0.0744322
YNB	393	Q ○ A	0.050983	0.0333021
YNB	393	Q ○ Q	6.76854e-07	0.0067675
YNB	393	A	0.0853813	0.0253748
YNB	393	Q	0.139845	0.0746735
YNB ph3	393	Residual	0.511892	0.024654
YNB ph3	393	Repeatibility	0.374126	0.094588
YNB ph3	393	A ○ A	0.0648852	0.0900917
YNB ph3	393	Q ○ A	1.15102e-09	0.0125444
YNB ph3	393	Q ○ Q	0.00507002	0.133058
YNB ph3	393	A	0.0440269	0.0204741
YNB ph3	393	Q	1.15102e-09	0.00158423
YNB ph8	393	Residual	0.482604	0.0232558
YNB ph8	393	Repeatibility	0.220269	0.0854759
YNB ph8	393	A ○ A	0.123018	0.0859862
YNB ph8	393	Q ○ A	0.0353476	0.0271481
YNB ph8	393	Q ○ Q	0.00304702	0.00589563
YNB ph8	393	A	0.0622301	0.0225727
YNB ph8	393	Q	0.0734841	0.0550555
YPD	393	Residual	0.323452	0.0155783
YPD	393	Repeatibility	0.189196	0.0612315
YPD	393	A ○ A	0.0400918	0.0664239
YPD	393	Q ○ A	0.0362756	0.0358495
YPD	393	Q ○ Q	0.01375	0.0106598
YPD	393	A	0.0594279	0.0196162
YPD	393	Q	0.337807	0.142671
YPD 15C	393	Residual	0.340091	0.0164166
YPD 15C	393	Repeatibility	0.391905	0.0792837
YPD 15C	393	A ○ A	2.9948e-10	0.0785103
YPD 15C	393	Q ○ A	0.0184094	0.0294579
YPD 15C	393	Q ○ Q	0.00901511	0.00850034
YPD 15C	393	A	0.0337582	0.017437
YPD 15C	393	Q	0.206822	0.122853
YPD 37C	393	Residual	0.314985	0.015204
YPD 37C	393	Repeatibility	0.224292	0.0644266
YPD 37C	393	A ○ A	0.0381177	0.0687331
YPD 37C	393	Q ○ A	0.0456443	0.0371299
YPD 37C	393	Q ○ Q	0.00239102	0.00918519
YPD 37C	393	A	0.0415845	0.0171572
YPD 37C	393	Q	0.332985	0.140228
Zeocin	393	Residual	0.116838	0.0056405
Zeocin	393	Repeatibility	0.12944	0.0441355
Zeocin	393	A ○ A	0.0404154	0.050077
Zeocin	393	Q ○ A	0.0772595	0.0319163
Zeocin	393	Q ○ Q	0.00409908	0.0088854
Zeocin	393	A	0.10566	0.0234752
Zeocin	393	Q	0.526288	0.197425
6-azauracil	381	Residual	0.210467	0.00971739
6-azauracil	381	Repeatibility	0.197652	0.055294
6-azauracil	381	A ○ A	0.058229	0.0609546
6-azauracil	381	Q ○ A	0.0703902	0.0346743
6-azauracil	381	Q ○ Q	2.15559e-06	0.00855429
6-azauracil	381	A	0.0558079	0.0179612
6-azauracil	381	Q	0.407451	0.164226
Cadmium Chloride	381	Residual	0.0330817	0.00153062
Cadmium Chloride	381	Repeatibility	0.0384108	0.0100607
Cadmium Chloride	381	A ○ A	0.0080218	0.0105986
Cadmium Chloride	381	Q ○ A	0.0171363	0.0057086
Cadmium Chloride	381	Q ○ Q	0.0115574	0.00390009
Cadmium Chloride	381	A	0.00652996	0.00263102
Cadmium Chloride	381	Q	0.885262	0.417895
Caffeine	381	Residual	0.160707	0.0074242
Caffeine	381	Repeatibility	0.0885453	0.0599464
Caffeine	381	A ○ A	0.255961	0.0754035
Caffeine	381	Q ○ A	0.0400838	0.0406144
Caffeine	381	Q ○ Q	0.0136791	0.011704
Caffeine	381	A	0.0734796	0.0213731
Caffeine	381	Q	0.367544	0.144646
Cobalt Chloride	381	Residual	0.137801	0.00636573
Cobalt Chloride	381	Repeatibility	0.158031	0.0385994
Cobalt Chloride	381	A ○ A	8.40663e-06	0.0414209
Cobalt Chloride	381	Q ○ A	0.0547866	0.0269525
Cobalt Chloride	381	Q ○ Q	0.00559183	0.00794275
Cobalt Chloride	381	A	0.104077	0.0220134
Cobalt Chloride	381	Q	0.539704	0.195802
Congo Red	381	Residual	0.242795	0.0111811
Congo Red	381	Repeatibility	0.216798	0.0443155
Congo Red	381	A ○ A	5.09475e-09	0.0463279
Congo Red	381	Q ○ A	2.41317e-05	0.0255742
Congo Red	381	Q ○ Q	0.0108324	0.00783155
Congo Red	381	A	0.0316112	0.0125005
Congo Red	381	Q	0.49794	0.191473
Diamide	381	Residual	0.240744	0.0111089
Diamide	381	Repeatibility	0.216866	0.0443006
Diamide	381	A ○ A	2.61481e-08	0.0460081
Diamide	381	Q ○ A	7.55803e-08	0.0240345
Diamide	381	Q ○ Q	0.00124692	0.00599282
Diamide	381	A	0.0539668	0.0159123
Diamide	381	Q	0.487176	0.194811
EGTA	381	Residual	0.100336	0.00462795
EGTA	381	Repeatibility	0.133414	0.0342417
EGTA	381	A ○ A	0.0440044	0.0366259
EGTA	381	Q ○ A	0.0281483	0.0177271
EGTA	381	Q ○ Q	6.92324e-06	0.00399393
EGTA	381	A	0.0699704	0.0160707
EGTA	381	Q	0.62412	0.259879
EtOH	381	Residual	0.237474	0.0109687
EtOH	381	Repeatibility	0.161574	0.0418666
EtOH	381	A ○ A	4.11771e-09	0.0472674
EtOH	381	Q ○ A	0.0287695	0.0319949
EtOH	381	Q ○ Q	0.005515	0.0095954
EtOH	381	A	0.0654459	0.0177141
EtOH	381	Q	0.501222	0.167486
EtOH Glu	381	Residual	0.192827	0.00889364
EtOH Glu	381	Repeatibility	0.185308	0.0448934
EtOH Glu	381	A ○ A	4.47629e-05	0.0477941
EtOH Glu	381	Q ○ A	0.0664024	0.028487
EtOH Glu	381	Q ○ Q	0.00113968	0.00726971
EtOH Glu	381	A	0.0566311	0.0164367
EtOH Glu	381	Q	0.497648	0.199161
Fluconazole	381	Residual	0.105641	0.00487761
Fluconazole	381	Repeatibility	0.0983738	0.0301509
Fluconazole	381	A ○ A	0.0216216	0.0343772
Fluconazole	381	Q ○ A	0.0392232	0.023548
Fluconazole	381	Q ○ Q	0.0316278	0.00986882
Fluconazole	381	A	0.0575558	0.0140838
Fluconazole	381	Q	0.645956	0.218911
Formamide	381	Residual	0.472215	0.0219583
Formamide	381	Repeatibility	0.101518	0.0500009
Formamide	381	A ○ A	3.4129e-10	0.0520126
Formamide	381	Q ○ A	0.0240073	0.0313097
Formamide	381	Q ○ Q	0.0274215	0.0118002
Formamide	381	A	0.0417197	0.0150001
Formamide	381	Q	0.333118	0.121914
Fructose	381	Residual	0.213397	0.00983728
Fructose	381	Repeatibility	0.181429	0.0452174
Fructose	381	A ○ A	0.0362612	0.0486735
Fructose	381	Q ○ A	0.021698	0.0241042
Fructose	381	Q ○ Q	0.000269195	0.00482413
Fructose	381	A	0.052787	0.0157105
Fructose	381	Q	0.494158	0.214301
Galactose	381	Residual	0.194697	0.00898451
Galactose	381	Repeatibility	0.194539	0.0456105
Galactose	381	A ○ A	0.0155504	0.0517222
Galactose	381	Q ○ A	0.0470681	0.0322933
Galactose	381	Q ○ Q	1.66851e-10	0.00862682
Galactose	381	A	0.0368204	0.0137473
Galactose	381	Q	0.511324	0.184652
Glycerol	381	Residual	0.284582	0.016703
Glycerol	381	Repeatibility	0.0779958	0.0625417
Glycerol	381	A ○ A	0.218626	0.0768843
Glycerol	381	Q ○ A	2.18979e-10	0.0435082
Glycerol	381	Q ○ Q	2.18979e-10	0.0109553
Glycerol	381	A	0.0377694	0.0164691
Glycerol	381	Q	0.381027	0.13949
Lactate	381	Residual	0.411587	0.0190165
Lactate	381	Repeatibility	0.0965412	0.0506331
Lactate	381	A ○ A	0.0795772	0.0574763
Lactate	381	Q ○ A	3.45187e-08	0.0320966
Lactate	381	Q ○ Q	0.00664623	0.00878036
Lactate	381	A	0.0332527	0.0137224
Lactate	381	Q	0.372396	0.139852
Lithium Chloride	381	Residual	0.0328243	0.00151721
Lithium Chloride	381	Repeatibility	0.0534556	0.0144498
Lithium Chloride	381	A ○ A	5.97454e-06	0.0159678
Lithium Chloride	381	Q ○ A	0.0331047	0.0117422
Lithium Chloride	381	Q ○ Q	0.0502966	0.008859
Lithium Chloride	381	A	0.0186536	0.00547043
Lithium Chloride	381	Q	0.811659	0.272009
Magnesium Chloride	381	Residual	0.254463	0.0117476
Magnesium Chloride	381	Repeatibility	0.202729	0.0449407
Magnesium Chloride	381	A ○ A	8.46301e-05	0.0475545
Magnesium Chloride	381	Q ○ A	0.0130579	0.0265895
Magnesium Chloride	381	Q ○ Q	1.67858e-10	0.00673112
Magnesium Chloride	381	A	0.0523308	0.0159188
Magnesium Chloride	381	Q	0.477334	0.184419
Maltose	381	Residual	0.0381529	0.00175981
Maltose	381	Repeatibility	0.0968559	0.0170501
Maltose	381	A ○ A	0.0127838	0.0183971
Maltose	381	Q ○ A	2.20141e-11	0.00947924
Maltose	381	Q ○ Q	0.00776749	0.00343391
Maltose	381	A	0.0123991	0.00479795
Maltose	381	Q	0.832041	0.340905
Manganese Sulfate	381	Residual	0.0453746	0.00208854
Manganese Sulfate	381	Repeatibility	0.116409	0.0265962
Manganese Sulfate	381	A ○ A	0.0449399	0.0314352
Manganese Sulfate	381	Q ○ A	3.64969e-11	0.0190617
Manganese Sulfate	381	Q ○ Q	0.0125976	0.00636059
Manganese Sulfate	381	A	0.0754101	0.0157126
Manganese Sulfate	381	Q	0.705269	0.245724
Mannose	381	Residual	0.235823	0.0109204
Mannose	381	Repeatibility	0.176908	0.0460211
Mannose	381	A ○ A	0.0420463	0.0503215
Mannose	381	Q ○ A	0.0112328	0.0272988
Mannose	381	Q ○ Q	0.00417053	0.00739951
Mannose	381	A	0.0470346	0.015169
Mannose	381	Q	0.482784	0.186311
Methotrexate	381	Residual	0.310868	0.0143938
Methotrexate	381	Repeatibility	0.153788	0.0496407
Methotrexate	381	A ○ A	2.20046e-10	0.0572181
Methotrexate	381	Q ○ A	0.059324	0.041533
Methotrexate	381	Q ○ Q	2.20046e-10	0.0124016
Methotrexate	381	A	0.0872978	0.0225049
Methotrexate	381	Q	0.388723	0.126218
Neomycin	381	Residual	0.0836538	0.00394122
Neomycin	381	Repeatibility	0.11237	0.0273515
Neomycin	381	A ○ A	8.40812e-08	0.0290119
Neomycin	381	Q ○ A	0.0440059	0.0192514
Neomycin	381	Q ○ Q	0.0349322	0.00960439
Neomycin	381	A	0.0384731	0.0107151
Neomycin	381	Q	0.686565	0.245431
Paraquat	381	Residual	0.0816711	0.00376306
Paraquat	381	Repeatibility	0.0889157	0.0199226
Paraquat	381	A ○ A	2.094e-06	0.0239338
Paraquat	381	Q ○ A	1.10173e-05	0.0203489
Paraquat	381	Q ○ Q	0.0225723	0.00821588
Paraquat	381	A	0.0386566	0.010056
Paraquat	381	Q	0.768171	0.198272
Raffinose	381	Residual	0.109963	0.00510371
Raffinose	381	Repeatibility	0.18577	0.033172
Raffinose	381	A ○ A	4.06736e-07	0.0396486
Raffinose	381	Q ○ A	0.00103134	0.0258708
Raffinose	381	Q ○ Q	0.0170506	0.00932767
Raffinose	381	A	0.0297569	0.0109556
Raffinose	381	Q	0.656427	0.20612
SDS	381	Residual	0.0743962	0.0034297
SDS	381	Repeatibility	0.0820135	0.0267573
SDS	381	A ○ A	0.031444	0.0298775
SDS	381	Q ○ A	0.0454206	0.0158025
SDS	381	Q ○ Q	0.486231	0.107381
SDS	381	A	0.055962	0.0126309
SDS	381	Q	0.224532	0.103963
Sorbitol	381	Residual	0.220087	0.0101671
Sorbitol	381	Repeatibility	0.299501	0.0695898
Sorbitol	381	A ○ A	0.0664877	0.0794963
Sorbitol	381	Q ○ A	0.0581521	0.0489876
Sorbitol	381	Q ○ Q	0.00599172	0.0137159
Sorbitol	381	A	0.06655	0.0226126
Sorbitol	381	Q	0.28323	0.106347
Sucrose	381	Residual	0.258822	0.011943
Sucrose	381	Repeatibility	0.215207	0.0470395
Sucrose	381	A ○ A	0.000806803	0.0363125
Sucrose	381	Q ○ A	0.00917653	0.024989
Sucrose	381	Q ○ Q	0.0105044	0.00759394
Sucrose	381	A	0.046935	0.0151613
Sucrose	381	Q	0.458549	0.190687
Trehalose	381	Residual	0.313007	0.0144882
Trehalose	381	Repeatibility	0.34423	0.0702275
Trehalose	381	A ○ A	0.04009	0.0731323
Trehalose	381	Q ○ A	2.0065e-07	0.0336386
Trehalose	381	Q ○ Q	0.0072491	0.00863762
Trehalose	381	A	0.0533249	0.0198715
Trehalose	381	Q	0.242099	0.112876
Tunicamycin	381	Residual	0.251171	0.011584
Tunicamycin	381	Repeatibility	0.170216	0.0419349
Tunicamycin	381	A ○ A	1.05243e-09	0.0512564
Tunicamycin	381	Q ○ A	3.81289e-07	0.04036
Tunicamycin	381	Q ○ Q	0.0210122	0.0139883
Tunicamycin	381	A	0.0630792	0.0181508
Tunicamycin	381	Q	0.494521	0.142891
Xylose	381	Residual	0.382549	0.0176697
Xylose	381	Repeatibility	0.264573	0.0691378
Xylose	381	A ○ A	0.0874339	0.0734603
Xylose	381	Q ○ A	3.44141e-10	0.0346346
Xylose	381	Q ○ Q	4.64749e-07	0.007785
Xylose	381	A	0.0309053	0.0158146
Xylose	381	Q	0.234539	0.103912
YNB	381	Residual	0.513139	0.0236304
YNB	381	Repeatibility	0.125863	0.0696838
YNB	381	A ○ A	0.0948749	0.0732402
YNB	381	Q ○ A	0.0636425	0.0332243
YNB	381	Q ○ Q	3.17424e-10	0.00679876
YNB	381	A	0.0647775	0.02104
YNB	381	Q	0.137704	0.0729736
YNB ph3	381	Residual	0.59439	0.0273713
YNB ph3	381	Repeatibility	0.0882563	0.0576595
YNB ph3	381	A ○ A	0.0450406	0.0566909
YNB ph3	381	Q ○ A	1.15233e-09	0.0212642
YNB ph3	381	Q ○ Q	1.15233e-09	0.00401631
YNB ph3	381	A	0.0657088	0.0191612
YNB ph3	381	Q	0.206605	0.113917
YNB ph8	381	Residual	0.637396	0.0293648
YNB ph8	381	Repeatibility	0.0734066	0.060128
YNB ph8	381	A ○ A	0.0617912	0.0591987
YNB ph8	381	Q ○ A	5.95199e-05	0.0246323
YNB ph8	381	Q ○ Q	1.21709e-09	0.00520495
YNB ph8	381	A	0.0450164	0.0162637
YNB ph8	381	Q	0.18233	0.0892311
YPD	381	Residual	0.302078	0.0139043
YPD	381	Repeatibility	0.147548	0.045876
YPD	381	A ○ A	0.0394003	0.0490399
YPD	381	Q ○ A	0.00930424	0.0247044
YPD	381	Q ○ Q	0.00591981	0.00675117
YPD	381	A	0.0422845	0.0142104
YPD	381	Q	0.453465	0.188528
YPD 15C	381	Residual	0.262092	0.0120883
YPD 15C	381	Repeatibility	0.28929	0.059711
YPD 15C	381	A ○ A	2.0958e-10	0.0637976
YPD 15C	381	Q ○ A	0.046172	0.0360058
YPD 15C	381	Q ○ Q	0.00261451	0.00922062
YPD 15C	381	A	0.0405713	0.0164003
YPD 15C	381	Q	0.35926	0.145195
Zeocin	381	Residual	0.463907	0.0213847
Zeocin	381	Repeatibility	0.318604	0.0780962
Zeocin	381	A ○ A	0.0221004	0.0759286
Zeocin	381	Q ○ A	0.0433216	0.0298549
Zeocin	381	Q ○ Q	0.0104548	0.00916945
Zeocin	381	A	0.0445751	0.0188911
Zeocin	381	Q	0.097037	0.0595729
6-azauracil	3008	Residual	0.290741	0.0146348
6-azauracil	3008	Repeatibility	0.139732	0.0651114
6-azauracil	3008	A ○ A	0.130884	0.0735091
6-azauracil	3008	Q ○ A	0.00757399	0.0382142
6-azauracil	3008	Q ○ Q	0.00557494	0.00987137
6-azauracil	3008	A	0.0570047	0.0199522
6-azauracil	3008	Q	0.368489	0.149379
Cadmium Chloride	3008	Residual	0.161233	0.00812618
Cadmium Chloride	3008	Repeatibility	0.118469	0.0430072
Cadmium Chloride	3008	A ○ A	0.0384088	0.0510357
Cadmium Chloride	3008	Q ○ A	0.00858844	0.0347132
Cadmium Chloride	3008	Q ○ Q	0.0336443	0.0130651
Cadmium Chloride	3008	A	0.0766695	0.0199175
Cadmium Chloride	3008	Q	0.562986	0.17921
Caffeine	3008	Residual	0.20856	0.010506
Caffeine	3008	Repeatibility	0.407575	0.0806888
Caffeine	3008	A ○ A	1.76403e-10	0.0831951
Caffeine	3008	Q ○ A	1.76403e-10	0.035345
Caffeine	3008	Q ○ Q	0.00653708	0.00872653
Caffeine	3008	A	0.1028	0.0294123
Caffeine	3008	Q	0.274529	0.135634
Cobalt Chloride	3008	Residual	0.196173	0.0102865
Cobalt Chloride	3008	Repeatibility	0.246573	0.0591944
Cobalt Chloride	3008	A ○ A	0.00585906	0.0619795
Cobalt Chloride	3008	Q ○ A	5.61981e-07	0.0418711
Cobalt Chloride	3008	Q ○ Q	0.0329023	0.0148012
Cobalt Chloride	3008	A	0.0630222	0.0206425
Cobalt Chloride	3008	Q	0.45547	0.157546
Congo Red	3008	Residual	0.331825	0.0166726
Congo Red	3008	Repeatibility	0.176822	0.0650283
Congo Red	3008	A ○ A	0.0625875	0.0714923
Congo Red	3008	Q ○ A	0.00857231	0.036602
Congo Red	3008	Q ○ Q	0.0141752	0.0111285
Congo Red	3008	A	0.0509315	0.0189858
Congo Red	3008	Q	0.355086	0.144011
Copper Sulfate	3008	Residual	0.0217661	0.00109378
Copper Sulfate	3008	Repeatibility	0.0937499	0.0205141
Copper Sulfate	3008	A ○ A	0.0268947	0.0207709
Copper Sulfate	3008	Q ○ A	0.00646918	0.00579118
Copper Sulfate	3008	Q ○ Q	0.00657295	0.00617922
Copper Sulfate	3008	A	0.0131272	0.00518241
Copper Sulfate	3008	Q	0.83142	0.679521
Diamide	3008	Residual	0.311695	0.0157074
Diamide	3008	Repeatibility	0.184413	0.0615
Diamide	3008	A ○ A	0.0394719	0.0663349
Diamide	3008	Q ○ A	8.79288e-08	0.036281
Diamide	3008	Q ○ Q	0.0123188	0.0106741
Diamide	3008	A	0.0771107	0.0225844
Diamide	3008	Q	0.374991	0.147063
EGTA	3008	Residual	0.204914	0.0103093
EGTA	3008	Repeatibility	0.185085	0.0650249
EGTA	3008	A ○ A	8.5641e-07	0.0764328
EGTA	3008	Q ○ A	0.109554	0.0538445
EGTA	3008	Q ○ Q	0.0231094	0.0173331
EGTA	3008	A	0.138878	0.0329027
EGTA	3008	Q	0.338459	0.121057
EtOH	3008	Residual	0.177726	0.00896328
EtOH	3008	Repeatibility	0.169916	0.0537538
EtOH	3008	A ○ A	0.0769793	0.0596585
EtOH	3008	Q ○ A	3.73038e-06	0.000899007
EtOH	3008	Q ○ Q	0.0121207	0.00849039
EtOH	3008	A	0.0731053	0.0204288
EtOH	3008	Q	0.490149	0.213425
EtOH Glu	3008	Residual	0.19272	0.00968379
EtOH Glu	3008	Repeatibility	0.0953658	0.0527467
EtOH Glu	3008	A ○ A	0.142431	0.0648303
EtOH Glu	3008	Q ○ A	0.00948832	0.038713
EtOH Glu	3008	Q ○ Q	0.016419	0.0116449
EtOH Glu	3008	A	0.0436035	0.0162162
EtOH Glu	3008	Q	0.499972	0.181243
Fluconazole	3008	Residual	0.239935	0.0120854
Fluconazole	3008	Repeatibility	0.143971	0.0641444
Fluconazole	3008	A ○ A	0.0846775	0.0752049
Fluconazole	3008	Q ○ A	0.0612115	0.0497419
Fluconazole	3008	Q ○ Q	8.27206e-11	0.0137154
Fluconazole	3008	A	0.0973794	0.0266676
Fluconazole	3008	Q	0.372826	0.131154
Formamide	3008	Residual	0.365551	0.0184085
Formamide	3008	Repeatibility	0.0642987	0.0586008
Formamide	3008	A ○ A	0.125961	0.0678425
Formamide	3008	Q ○ A	0.00468866	0.0354371
Formamide	3008	Q ○ Q	0.0261664	0.0123307
Formamide	3008	A	0.0305426	0.0145557
Formamide	3008	Q	0.382792	0.154129
Fructose	3008	Residual	0.212921	0.0107245
Fructose	3008	Repeatibility	0.146089	0.0533319
Fructose	3008	A ○ A	0.0874595	0.0635372
Fructose	3008	Q ○ A	0.00380964	0.0420187
Fructose	3008	Q ○ Q	0.0065113	0.0116909
Fructose	3008	A	0.039307	0.0157938
Fructose	3008	Q	0.503902	0.16812
Galactose	3008	Residual	0.0502762	0.00252486
Galactose	3008	Repeatibility	0.166823	0.0393444
Galactose	3008	A ○ A	0.0627322	0.0432036
Galactose	3008	Q ○ A	3.67828e-11	0.0193796
Galactose	3008	Q ○ Q	0.0207621	0.00855253
Galactose	3008	A	0.0235919	0.0101089
Galactose	3008	Q	0.675815	0.293744
Glycerol	3008	Residual	0.220851	0.011084
Glycerol	3008	Repeatibility	0.263446	0.083843
Glycerol	3008	A ○ A	0.103733	0.0904856
Glycerol	3008	Q ○ A	0.0793014	0.0442531
Glycerol	3008	Q ○ Q	0.00557782	0.0104568
Glycerol	3008	A	0.0830311	0.0268167
Glycerol	3008	Q	0.244059	0.120639
Lactate	3008	Residual	0.202846	0.0101989
Lactate	3008	Repeatibility	0.249031	0.0594652
Lactate	3008	A ○ A	0.0159156	0.063086
Lactate	3008	Q ○ A	4.78527e-07	0.0343294
Lactate	3008	Q ○ Q	0.00253336	0.00839984
Lactate	3008	A	0.109168	0.0270263
Lactate	3008	Q	0.420505	0.171218
Lithium Chloride	3008	Residual	0.048303	0.00243944
Lithium Chloride	3008	Repeatibility	0.0858194	0.0260448
Lithium Chloride	3008	A ○ A	0.0140062	0.0283271
Lithium Chloride	3008	Q ○ A	0.0425731	0.0152797
Lithium Chloride	3008	Q ○ Q	0.0376864	0.0120701
Lithium Chloride	3008	A	0.0449801	0.0112139
Lithium Chloride	3008	Q	0.726632	0.344739
Magnesium Chloride	3008	Residual	0.207902	0.0104402
Magnesium Chloride	3008	Repeatibility	0.117676	0.0495146
Magnesium Chloride	3008	A ○ A	0.0716499	0.0602694
Magnesium Chloride	3008	Q ○ A	0.0134176	0.0396911
Magnesium Chloride	3008	Q ○ Q	0.00374566	0.0113241
Magnesium Chloride	3008	A	0.0864942	0.0224922
Magnesium Chloride	3008	Q	0.499115	0.163996
Maltose	3008	Residual	0.0263215	0.00132434
Maltose	3008	Repeatibility	0.0921496	0.0176245
Maltose	3008	A ○ A	2.17834e-11	0.0189155
Maltose	3008	Q ○ A	3.95663e-09	0.0113702
Maltose	3008	Q ○ Q	0.0122815	0.00442368
Maltose	3008	A	0.021037	0.00639867
Maltose	3008	Q	0.84821	0.301484
Manganese Sulfate	3008	Residual	0.0640878	0.00321646
Manganese Sulfate	3008	Repeatibility	0.156636	0.047955
Manganese Sulfate	3008	A ○ A	0.0948413	0.0638848
Manganese Sulfate	3008	Q ○ A	0.0108783	0.0484515
Manganese Sulfate	3008	Q ○ Q	0.00435227	0.0151794
Manganese Sulfate	3008	A	0.107113	0.0258694
Manganese Sulfate	3008	Q	0.562091	0.163285
Mannose	3008	Residual	0.260351	0.0130892
Mannose	3008	Repeatibility	0.113463	0.0536363
Mannose	3008	A ○ A	0.0839035	0.0649037
Mannose	3008	Q ○ A	0.00174583	0.03665
Mannose	3008	Q ○ Q	0.028315	0.0133928
Mannose	3008	A	0.0508213	0.0176313
Mannose	3008	Q	0.461401	0.163185
Methotrexate	3008	Residual	0.316021	0.0159916
Methotrexate	3008	Repeatibility	0.177447	0.0626327
Methotrexate	3008	A ○ A	1.94419e-10	0.0694643
Methotrexate	3008	Q ○ A	0.0672	0.0427882
Methotrexate	3008	Q ○ Q	2.38359e-05	0.0111228
Methotrexate	3008	A	0.0655636	0.0212237
Methotrexate	3008	Q	0.373745	0.141922
Neomycin	3008	Residual	0.0558831	0.00281696
Neomycin	3008	Repeatibility	0.0938973	0.0306478
Neomycin	3008	A ○ A	0.0452748	0.0354416
Neomycin	3008	Q ○ A	0.0254394	0.0212304
Neomycin	3008	Q ○ Q	0.0451531	0.0115441
Neomycin	3008	A	0.0263475	0.00953242
Neomycin	3008	Q	0.708005	0.270057
Paraquat	3008	Residual	0.0426062	0.00214639
Paraquat	3008	Repeatibility	0.168884	0.0310689
Paraquat	3008	A ○ A	9.21472e-06	0.0328
Paraquat	3008	Q ○ A	2.77519e-11	0.0166824
[truncated: 2,201 more rows]

## Sheet: Multiple VC Model (1 epistasis component)
Trait	Cross	Component	Fraction_of_variance	Standard Error
6-azauracil	375	Residual	0.105505	0.00504695
6-azauracil	375	Repeatibility	0.160642	0.0674663
6-azauracil	375	A ○ A	0.21881	0.070888
6-azauracil	375	A	0.0527389	0.0179315
6-azauracil	375	Q	0.462304	0.189326
Cadmium Chloride	375	Residual	0.0466366	0.00223218
Cadmium Chloride	375	Repeatibility	0.142775	0.0358595
Cadmium Chloride	375	A ○ A	0.0557475	0.0358449
Cadmium Chloride	375	A	0.0431231	0.0116972
Cadmium Chloride	375	Q	0.711718	0.305785
Caffeine	375	Residual	0.0684245	0.00336133
Caffeine	375	Repeatibility	0.122723	0.0338954
Caffeine	375	A ○ A	0.0324795	0.0331954
Caffeine	375	A	0.112671	0.0207402
Caffeine	375	Q	0.663702	0.217816
Cobalt Chloride	375	Residual	0.0827674	0.00395923
Cobalt Chloride	375	Repeatibility	0.153821	0.0433075
Cobalt Chloride	375	A ○ A	0.0743549	0.0434511
Cobalt Chloride	375	A	0.0401256	0.0128397
Cobalt Chloride	375	Q	0.648931	0.203922
Congo Red	375	Residual	0.0672681	0.0032142
Congo Red	375	Repeatibility	0.124771	0.0354419
Congo Red	375	A ○ A	0.0650744	0.0356959
Congo Red	375	A	0.0299978	0.00984016
Congo Red	375	Q	0.712889	0.289429
Copper Sulfate	375	Residual	0.118186	0.00565032
Copper Sulfate	375	Repeatibility	0.0366079	0.060504
Copper Sulfate	375	A ○ A	0.305318	0.0668376
Copper Sulfate	375	A	0.0460567	0.0154261
Copper Sulfate	375	Q	0.493831	0.266833
Diamide	375	Residual	0.116939	0.00559383
Diamide	375	Repeatibility	0.110645	0.0588987
Diamide	375	A ○ A	0.212212	0.0626322
Diamide	375	A	0.0419853	0.0151469
Diamide	375	Q	0.518219	0.215433
EGTA	375	Residual	0.13211	0.00631947
EGTA	375	Repeatibility	0.148361	0.0477945
EGTA	375	A ○ A	0.0838862	0.0480658
EGTA	375	A	0.0472884	0.0143495
EGTA	375	Q	0.588355	0.225929
EtOH	375	Residual	0.120379	0.00575514
EtOH	375	Repeatibility	0.199111	0.0615952
EtOH	375	A ○ A	0.127137	0.0625225
EtOH	375	A	0.0605614	0.0182278
EtOH	375	Q	0.492812	0.21414
EtOH Glu	375	Residual	0.124437	0.00598987
EtOH Glu	375	Repeatibility	0.209059	0.0723979
EtOH Glu	375	A ○ A	0.187765	0.0747305
EtOH Glu	375	A	0.0619034	0.0200362
EtOH Glu	375	Q	0.416836	0.182223
Fluconazole	375	Residual	0.0687078	0.00328485
Fluconazole	375	Repeatibility	0.213352	0.05263
Fluconazole	375	A ○ A	0.0887569	0.052747
Fluconazole	375	A	0.0313044	0.0128768
Fluconazole	375	Q	0.597879	0.221758
Formamide	375	Residual	0.254168	0.0155973
Formamide	375	Repeatibility	1.53838e-10	0.0740754
Formamide	375	A ○ A	0.308039	0.0795072
Formamide	375	A	0.0591493	0.0194033
Formamide	375	Q	0.378644	0.193043
Fructose	375	Residual	0.114543	0.00547306
Fructose	375	Repeatibility	0.163709	0.0621019
Fructose	375	A ○ A	0.176559	0.0646265
Fructose	375	A	0.0452448	0.0163008
Fructose	375	Q	0.499945	0.193337
Galactose	375	Residual	0.0502691	0.00240468
Galactose	375	Repeatibility	0.127604	0.0431154
Galactose	375	A ○ A	0.127508	0.0451975
Galactose	375	A	0.0257297	0.0101577
Galactose	375	Q	0.668889	0.301495
Glycerol	375	Residual	0.143431	0.00688051
Glycerol	375	Repeatibility	0.224068	0.0716806
Glycerol	375	A ○ A	0.163662	0.0732293
Glycerol	375	A	0.0446061	0.0176414
Glycerol	375	Q	0.424233	0.1709
Lactate	375	Residual	0.152191	0.00727603
Lactate	375	Repeatibility	0.139313	0.069667
Lactate	375	A ○ A	0.210873	0.0728575
Lactate	375	A	0.113971	0.0270393
Lactate	375	Q	0.383652	0.156315
Lithium Chloride	375	Residual	0.051849	0.00251322
Lithium Chloride	375	Repeatibility	0.184649	0.0343572
Lithium Chloride	375	A ○ A	6.24081e-05	0.0325268
Lithium Chloride	375	A	0.041944	0.0119813
Lithium Chloride	375	Q	0.721496	0.226055
Magnesium Chloride	375	Residual	0.141892	0.00686533
Magnesium Chloride	375	Repeatibility	0.182291	0.0751116
Magnesium Chloride	375	A ○ A	0.221224	0.078354
Magnesium Chloride	375	A	0.0705469	0.0219497
Magnesium Chloride	375	Q	0.384046	0.161987
Maltose	375	Residual	0.0376674	0.00184529
Maltose	375	Repeatibility	0.0808882	0.0265716
Maltose	375	A ○ A	0.0697791	0.0274626
Maltose	375	A	0.0186139	0.00667257
Maltose	375	Q	0.793051	0.349659
Manganese Sulfate	375	Residual	0.0597969	0.00287029
Manganese Sulfate	375	Repeatibility	0.246365	0.0606738
Manganese Sulfate	375	A ○ A	0.0977004	0.0607226
Manganese Sulfate	375	A	0.0698321	0.0202825
Manganese Sulfate	375	Q	0.526305	0.172065
Mannose	375	Residual	0.104811	0.00501656
Mannose	375	Repeatibility	0.188392	0.060578
Mannose	375	A ○ A	0.142695	0.0620771
Mannose	375	A	0.0476968	0.0167331
Mannose	375	Q	0.516406	0.181857
Methotrexate	375	Residual	0.33737	0.0174518
Methotrexate	375	Repeatibility	0.30414	0.0786275
Methotrexate	375	A ○ A	0.000329857	0.0504903
Methotrexate	375	A	0.0664474	0.0218985
Methotrexate	375	Q	0.291713	0.124385
Neomycin	375	Residual	0.122306	0.00584727
Neomycin	375	Repeatibility	0.0535214	0.0527109
Neomycin	375	A ○ A	0.215087	0.0570978
Neomycin	375	A	0.082297	0.0201178
Neomycin	375	Q	0.526788	0.204048
Paraquat	375	Residual	0.0753523	0.0036025
Paraquat	375	Repeatibility	0.18989	0.0454373
Paraquat	375	A ○ A	0.0419905	0.0444209
Paraquat	375	A	0.0841663	0.0197897
Paraquat	375	Q	0.608601	0.181053
Raffinose	375	Residual	0.0643264	0.00309475
Raffinose	375	Repeatibility	0.13637	0.0481425
Raffinose	375	A ○ A	0.135958	0.0500576
Raffinose	375	A	0.0441073	0.0138252
Raffinose	375	Q	0.619239	0.259413
SDS	375	Residual	0.0390391	0.00186536
SDS	375	Repeatibility	0.112778	0.0340548
SDS	375	A ○ A	0.0895229	0.0351794
SDS	375	A	0.0178288	0.00749532
SDS	375	Q	0.740831	0.397596
Sorbitol	375	Residual	0.111676	0.00534513
Sorbitol	375	Repeatibility	0.221871	0.0605547
Sorbitol	375	A ○ A	0.105582	0.0607115
Sorbitol	375	A	0.0439147	0.01608
Sorbitol	375	Q	0.516956	0.187098
Sucrose	375	Residual	0.131336	0.006279
Sucrose	375	Repeatibility	0.129888	0.0656469
Sucrose	375	A ○ A	0.221141	0.0693046
Sucrose	375	A	0.0667311	0.0196413
Sucrose	375	Q	0.450904	0.205912
Trehalose	375	Residual	0.136989	0.00659402
Trehalose	375	Repeatibility	0.228228	0.0751845
Trehalose	375	A ○ A	0.186569	0.0772863
Trehalose	375	A	0.0486267	0.0181273
Trehalose	375	Q	0.399587	0.203452
Tunicamycin	375	Residual	0.119222	0.00569666
Tunicamycin	375	Repeatibility	0.127307	0.0383762
Tunicamycin	375	A ○ A	0.0444853	0.0378033
Tunicamycin	375	A	0.0552811	0.0146344
Tunicamycin	375	Q	0.653704	0.189254
Xylose	375	Residual	0.162224	0.00776446
Xylose	375	Repeatibility	0.202972	0.0787038
Xylose	375	A ○ A	0.218797	0.0816786
Xylose	375	A	0.0628591	0.0208948
Xylose	375	Q	0.353147	0.170822
YNB	375	Residual	0.0796973	0.00381021
YNB	375	Repeatibility	0.0842038	0.0327098
YNB	375	A ○ A	0.0828069	0.0337086
YNB	375	A	0.0304138	0.00934256
YNB	375	Q	0.722878	0.342733
YNB ph3	375	Residual	0.688893	0.0329819
YNB ph3	375	Repeatibility	0.210352	0.0883907
YNB ph3	375	A ○ A	0.0240311	0.0829651
YNB ph3	375	A	0.0183789	0.014129
YNB ph3	375	Q	0.0583444	0.0598913
YNB ph8	375	Residual	0.567099	0.027263
YNB ph8	375	Repeatibility	0.221981	0.0816956
YNB ph8	375	A ○ A	0.00451999	0.0766991
YNB ph8	375	A	0.0695516	0.0217188
YNB ph8	375	Q	0.136848	0.114157
YPD	375	Residual	0.14427	0.00689348
YPD	375	Repeatibility	0.190826	0.0679941
YPD	375	A ○ A	0.166503	0.0698492
YPD	375	A	0.0613988	0.0194304
YPD	375	Q	0.437002	0.18289
YPD 15C	375	Residual	0.105628	0.00505279
YPD 15C	375	Repeatibility	0.152896	0.0591741
YPD 15C	375	A ○ A	0.169869	0.0616296
YPD 15C	375	A	0.0521034	0.01668
YPD 15C	375	Q	0.519504	0.207979
YPD 37C	375	Residual	0.110805	0.00531238
YPD 37C	375	Repeatibility	0.193347	0.054513
YPD 37C	375	A ○ A	0.0910343	0.0546485
YPD 37C	375	A	0.0551957	0.0164983
YPD 37C	375	Q	0.549618	0.219511
Zeocin	375	Residual	0.0517898	0.00247602
Zeocin	375	Repeatibility	0.119157	0.0504284
Zeocin	375	A ○ A	0.151254	0.0528153
Zeocin	375	A	0.129855	0.0261001
Zeocin	375	Q	0.547944	0.183824
6-azauracil	A	Residual	0.181456	0.0083384
6-azauracil	A	Repeatibility	0.271562	0.0545028
6-azauracil	A	A ○ A	0.0219504	0.0510838
6-azauracil	A	A	0.0828397	0.0211264
6-azauracil	A	Q	0.442192	0.161722
Cadmium Chloride	A	Residual	0.045789	0.00210959
Cadmium Chloride	A	Repeatibility	0.0704091	0.0153462
Cadmium Chloride	A	A ○ A	0.018955	0.0150231
Cadmium Chloride	A	A	0.0117302	0.00419397
Cadmium Chloride	A	Q	0.853117	0.302716
Caffeine	A	Residual	0.0837169	0.00385285
Caffeine	A	Repeatibility	0.0812791	0.0221961
Caffeine	A	A ○ A	0.0267358	0.0217027
Caffeine	A	A	0.0593299	0.0128736
Caffeine	A	Q	0.748938	0.188437
Cobalt Chloride	A	Residual	0.0768523	0.00355405
Cobalt Chloride	A	Repeatibility	0.166681	0.0401871
Cobalt Chloride	A	A ○ A	0.0794224	0.0404045
Cobalt Chloride	A	A	0.070083	0.0174761
Cobalt Chloride	A	Q	0.606961	0.188164
Congo Red	A	Residual	0.218851	0.0100513
Congo Red	A	Repeatibility	0.14324	0.0462739
Congo Red	A	A ○ A	0.0813669	0.045975
Congo Red	A	A	0.0542339	0.0154563
Congo Red	A	Q	0.502308	0.200689
Copper Sulfate	A	Residual	0.187332	0.00859949
Copper Sulfate	A	Repeatibility	0.202089	0.0434177
Copper Sulfate	A	A ○ A	0.0142755	0.0408179
Copper Sulfate	A	A	0.0488802	0.0147131
Copper Sulfate	A	Q	0.547423	0.181773
Diamide	A	Residual	0.113583	0.00521947
Diamide	A	Repeatibility	0.158403	0.0340609
Diamide	A	A ○ A	0.0267405	0.0327943
Diamide	A	A	0.0481917	0.0126662
Diamide	A	Q	0.653082	0.248581
EGTA	A	Residual	0.131226	0.00603021
EGTA	A	Repeatibility	0.100107	0.0377756
EGTA	A	A ○ A	0.0962694	0.0386335
EGTA	A	A	0.105639	0.0215834
EGTA	A	Q	0.566758	0.176523
EtOH	A	Residual	0.205419	0.00946233
EtOH	A	Repeatibility	0.0891236	0.0385295
EtOH	A	A ○ A	0.0805962	0.0385631
EtOH	A	A	0.066812	0.016124
EtOH	A	Q	0.558049	0.215068
EtOH Glu	A	Residual	0.188743	0.00869084
EtOH Glu	A	Repeatibility	0.205147	0.0498584
EtOH Glu	A	A ○ A	0.055301	0.0485514
EtOH Glu	A	A	0.069679	0.0183298
EtOH Glu	A	Q	0.481129	0.193392
Fluconazole	A	Residual	0.0866852	0.00398987
Fluconazole	A	Repeatibility	0.16368	0.0499465
Fluconazole	A	A ○ A	0.166918	0.0525592
Fluconazole	A	A	0.0584044	0.0169407
Fluconazole	A	Q	0.524313	0.195851
Formamide	A	Residual	0.486552	0.0228275
Formamide	A	Repeatibility	0.190628	0.0677305
Formamide	A	A ○ A	0.0443491	0.0637801
Formamide	A	A	0.0628407	0.0194722
Formamide	A	Q	0.21563	0.10541
Fructose	A	Residual	0.186573	0.00856465
Fructose	A	Repeatibility	0.186475	0.0436874
Fructose	A	A ○ A	0.0273926	0.0416362
Fructose	A	A	0.0715129	0.0175935
Fructose	A	Q	0.528047	0.204074
Galactose	A	Residual	0.210243	0.00965129
Galactose	A	Repeatibility	0.180881	0.0522994
Galactose	A	A ○ A	0.08542	0.0518078
Galactose	A	A	0.0857516	0.0208022
Galactose	A	Q	0.437704	0.18315
Glycerol	A	Residual	0.309447	0.0142948
Glycerol	A	Repeatibility	0.132658	0.0493281
Glycerol	A	A ○ A	0.0577642	0.0478297
Glycerol	A	A	0.0735031	0.0192105
Glycerol	A	Q	0.426628	0.143544
Lactate	A	Residual	0.33544	0.0154185
Lactate	A	Repeatibility	0.0590568	0.039289
Lactate	A	A ○ A	0.0376229	0.0374528
Lactate	A	A	0.0925743	0.0199263
Lactate	A	Q	0.475306	0.152623
Lithium Chloride	A	Residual	0.0303605	0.00139742
Lithium Chloride	A	Repeatibility	0.0949863	0.0195169
Lithium Chloride	A	A ○ A	0.0246498	0.0191901
Lithium Chloride	A	A	0.0424843	0.00985192
Lithium Chloride	A	Q	0.807519	0.218901
Magnesium Chloride	A	Residual	0.120047	0.0055135
Magnesium Chloride	A	Repeatibility	0.113273	0.0255272
Magnesium Chloride	A	A ○ A	0.00426256	0.0239772
Magnesium Chloride	A	A	0.0471382	0.0110944
Magnesium Chloride	A	Q	0.715278	0.261759
Maltose	A	Residual	0.0834516	0.00403338
Maltose	A	Repeatibility	0.175815	0.0412623
Maltose	A	A ○ A	0.0829027	0.0414636
Maltose	A	A	0.0363851	0.011793
Maltose	A	Q	0.621445	0.280517
Manganese Sulfate	A	Residual	0.0470642	0.0021617
Manganese Sulfate	A	Repeatibility	0.0421242	0.0240903
Manganese Sulfate	A	A ○ A	0.128937	0.0267932
Manganese Sulfate	A	A	0.028538	0.00923218
Manganese Sulfate	A	Q	0.753337	0.197652
Mannose	A	Residual	0.170089	0.007812
Mannose	A	Repeatibility	0.211803	0.0468293
Mannose	A	A ○ A	0.0356898	0.0450201
Mannose	A	A	0.0621605	0.0173888
Mannose	A	Q	0.520258	0.172197
Methotrexate	A	Residual	0.331216	0.0152621
Methotrexate	A	Repeatibility	0.0416593	0.0473332
Methotrexate	A	A ○ A	0.130975	0.0483479
Methotrexate	A	A	0.0783043	0.0194165
Methotrexate	A	Q	0.417845	0.148453
Neomycin	A	Residual	0.090616	0.00420609
Neomycin	A	Repeatibility	0.173975	0.0449733
Neomycin	A	A ○ A	0.107799	0.0458728
Neomycin	A	A	0.0522884	0.0159398
Neomycin	A	Q	0.575322	0.174595
Paraquat	A	Residual	0.0901653	0.00413915
Paraquat	A	Repeatibility	0.100418	0.0313269
Paraquat	A	A ○ A	0.063404	0.0315837
Paraquat	A	A	0.122207	0.0226137
Paraquat	A	Q	0.623806	0.170122
Raffinose	A	Residual	0.182173	0.00881047
Raffinose	A	Repeatibility	0.14546	0.0442454
Raffinose	A	A ○ A	0.0736634	0.0437908
Raffinose	A	A	0.054649	0.0157181
Raffinose	A	Q	0.544055	0.185913
SDS	A	Residual	0.0718688	0.00330101
SDS	A	Repeatibility	0.155956	0.04886
SDS	A	A ○ A	0.171073	0.051642
SDS	A	A	0.075966	0.0193335
SDS	A	Q	0.525136	0.196396
Sorbitol	A	Residual	0.144782	0.00669167
Sorbitol	A	Repeatibility	0.263207	0.0621877
Sorbitol	A	A ○ A	0.125321	0.0625285
Sorbitol	A	A	0.0455387	0.0167666
Sorbitol	A	Q	0.421151	0.169547
Sucrose	A	Residual	0.0919426	0.00422064
Sucrose	A	Repeatibility	0.0707413	0.021678
Sucrose	A	A ○ A	0.0373366	0.0215351
Sucrose	A	A	0.0356024	0.00856288
Sucrose	A	Q	0.764377	0.333922
Trehalose	A	Residual	0.349869	0.0161764
Trehalose	A	Repeatibility	0.0974023	0.0512896
Trehalose	A	A ○ A	0.108414	0.0512486
Trehalose	A	A	0.0234308	0.0115178
Trehalose	A	Q	0.420884	0.16224
Tunicamycin	A	Residual	0.202799	0.00931389
Tunicamycin	A	Repeatibility	0.072287	0.0365738
Tunicamycin	A	A ○ A	0.0716278	0.036603
Tunicamycin	A	A	0.116735	0.023887
Tunicamycin	A	Q	0.536551	0.134041
Xylose	A	Residual	0.444564	0.0205586
Xylose	A	Repeatibility	0.137107	0.0531455
Xylose	A	A ○ A	0.0197247	0.0495128
Xylose	A	A	0.0431528	0.014679
Xylose	A	Q	0.355451	0.155006
YNB	A	Residual	0.372517	0.0170833
YNB	A	Repeatibility	0.230131	0.0617645
YNB	A	A ○ A	0.0260079	0.0583441
YNB	A	A	0.0682955	0.0197605
YNB	A	Q	0.303049	0.139874
YNB ph3	A	Residual	0.651078	0.0298707
YNB ph3	A	Repeatibility	0.070013	0.0572537
YNB ph3	A	A ○ A	0.0145519	0.0525324
YNB ph3	A	A	0.0327028	0.0133441
YNB ph3	A	Q	0.231654	0.106744
YNB ph8	A	Residual	0.139814	0.00641749
YNB ph8	A	Repeatibility	0.0229079	0.0146413
YNB ph8	A	A ○ A	0.0108339	0.0137745
YNB ph8	A	A	0.0149429	0.00439179
YNB ph8	A	Q	0.811501	0.392413
YPD	A	Residual	0.25596	0.0117438
YPD	A	Repeatibility	0.147208	0.0443014
YPD	A	A ○ A	0.0365772	0.0424214
YPD	A	A	0.0669052	0.0171556
YPD	A	Q	0.493349	0.184761
YPD 15C	A	Residual	0.217733	0.00999006
YPD 15C	A	Repeatibility	0.276103	0.0532632
YPD 15C	A	A ○ A	1.6401e-10	0.0497015
YPD 15C	A	A	0.0557281	0.0164492
YPD 15C	A	Q	0.450435	0.228362
YPD 37C	A	Residual	0.082681	0.00379741
YPD 37C	A	Repeatibility	0.103306	0.020092
YPD 37C	A	A ○ A	4.58957e-11	0.0187433
YPD 37C	A	A	0.0202732	0.00637076
YPD 37C	A	Q	0.793739	0.282343
Zeocin	A	Residual	0.0581681	0.00267309
Zeocin	A	Repeatibility	0.126824	0.0278489
Zeocin	A	A ○ A	0.0322213	0.0272697
Zeocin	A	A	0.0810879	0.016776
Zeocin	A	Q	0.701698	0.1925
6-azauracil	376	Residual	0.336281	0.017908
6-azauracil	376	Repeatibility	0.159513	0.0905399
6-azauracil	376	A ○ A	0.130273	0.0905693
6-azauracil	376	A	0.0842268	0.0263931
6-azauracil	376	Q	0.289706	0.135279
Cadmium Chloride	376	Residual	0.241864	0.0128977
Cadmium Chloride	376	Repeatibility	0.225651	0.0731639
Cadmium Chloride	376	A ○ A	2.35309e-06	0.0697692
Cadmium Chloride	376	A	0.136048	0.0308753
Cadmium Chloride	376	Q	0.396435	0.182963
Caffeine	376	Residual	0.116504	0.0062137
Caffeine	376	Repeatibility	0.242332	0.0750485
Caffeine	376	A ○ A	0.0773456	0.0740499
Caffeine	376	A	0.067534	0.0220937
Caffeine	376	Q	0.496285	0.186627
Cobalt Chloride	376	Residual	0.121313	0.00647492
Cobalt Chloride	376	Repeatibility	0.365789	0.0996434
Cobalt Chloride	376	A ○ A	0.0323399	0.0958846
Cobalt Chloride	376	A	0.255317	0.0506671
Cobalt Chloride	376	Q	0.225241	0.120701
Congo Red	376	Residual	0.339947	0.0181035
Congo Red	376	Repeatibility	0.289243	0.0982319
Congo Red	376	A ○ A	0.0536222	0.095299
Congo Red	376	A	0.0466737	0.021426
Congo Red	376	Q	0.270514	0.139702
Copper Sulfate	376	Residual	0.0216635	0.00116631
Copper Sulfate	376	Repeatibility	0.274683	0.0542272
Copper Sulfate	376	A ○ A	0.00386244	0.0516371
Copper Sulfate	376	A	0.0185575	0.0102262
Copper Sulfate	376	Q	0.681233	0.558944
Diamide	376	Residual	0.326301	0.0173646
Diamide	376	Repeatibility	0.240853	0.0785021
Diamide	376	A ○ A	1.6995e-06	0.0745768
Diamide	376	A	0.0437248	0.0187846
Diamide	376	Q	0.38912	0.157368
EGTA	376	Residual	0.236252	0.0125732
EGTA	376	Repeatibility	0.138427	0.0739401
EGTA	376	A ○ A	0.0968027	0.0732837
EGTA	376	A	0.127457	0.0304731
EGTA	376	Q	0.401061	0.148863
EtOH	376	Residual	0.271368	0.0145493
EtOH	376	Repeatibility	0.226537	0.0774653
EtOH	376	A ○ A	4.24591e-06	0.0741222
EtOH	376	A	0.161235	0.0348763
EtOH	376	Q	0.340856	0.164345
EtOH Glu	376	Residual	0.243676	0.0129945
EtOH Glu	376	Repeatibility	0.168694	0.0751686
EtOH Glu	376	A ○ A	0.0939521	0.0747224
EtOH Glu	376	A	0.054831	0.0197207
EtOH Glu	376	Q	0.438847	0.191564
Fluconazole	376	Residual	0.15563	0.00829442
Fluconazole	376	Repeatibility	0.111422	0.0764566
Fluconazole	376	A ○ A	0.196656	0.0796017
Fluconazole	376	A	0.10407	0.0271424
Fluconazole	376	Q	0.432222	0.189874
Formamide	376	Residual	0.542003	0.0288761
Formamide	376	Repeatibility	0.161589	0.089065
Formamide	376	A ○ A	0.0147114	0.0847128
Formamide	376	A	0.0678442	0.0239215
Formamide	376	Q	0.213853	0.0967454
Fructose	376	Residual	0.204056	0.010867
Fructose	376	Repeatibility	0.198309	0.065971
Fructose	376	A ○ A	0.0384551	0.0641112
Fructose	376	A	0.0397432	0.0162994
Fructose	376	Q	0.519437	0.200644
Galactose	376	Residual	0.278673	0.0149017
Galactose	376	Repeatibility	0.0911513	0.092698
Galactose	376	A ○ A	0.256645	0.0966426
Galactose	376	A	0.0716514	0.0247241
Galactose	376	Q	0.301879	0.147363
Glycerol	376	Residual	0.43709	0.0240914
Glycerol	376	Repeatibility	0.187295	0.086483
Glycerol	376	A ○ A	0.00678911	0.0813905
Glycerol	376	A	0.0998663	0.0277783
Glycerol	376	Q	0.268959	0.1395
Lactate	376	Residual	0.400104	0.0215659
Lactate	376	Repeatibility	0.0855326	0.0596084
Lactate	376	A ○ A	0.00174426	0.0561172
Lactate	376	A	0.0628439	0.018956
Lactate	376	Q	0.449775	0.168922
Lithium Chloride	376	Residual	0.0448754	0.00239339
Lithium Chloride	376	Repeatibility	0.084807	0.0263341
Lithium Chloride	376	A ○ A	0.00945257	0.0254192
Lithium Chloride	376	A	0.0830174	0.0157765
Lithium Chloride	376	Q	0.777848	0.260776
Magnesium Chloride	376	Residual	0.234256	0.0124667
Magnesium Chloride	376	Repeatibility	0.22459	0.0688629
Magnesium Chloride	376	A ○ A	0.00959712	0.0646526
Magnesium Chloride	376	A	0.0444252	0.0176715
Magnesium Chloride	376	Q	0.487132	0.182535
Maltose	376	Residual	0.0475629	0.00254403
Maltose	376	Repeatibility	0.133683	0.0453386
Maltose	376	A ○ A	0.0654803	0.0453283
Maltose	376	A	0.0641701	0.0162381
Maltose	376	Q	0.689104	0.327702
Manganese Sulfate	376	Residual	0.0588608	0.00312839
Manganese Sulfate	376	Repeatibility	0.117675	0.0426996
Manganese Sulfate	376	A ○ A	0.0571976	0.0427548
Manganese Sulfate	376	A	0.0755532	0.0183655
Manganese Sulfate	376	Q	0.690713	0.223237
Mannose	376	Residual	0.246828	0.0131807
Mannose	376	Repeatibility	0.201125	0.0809936
Mannose	376	A ○ A	0.0851505	0.0799934
Mannose	376	A	0.0682221	0.0226564
Mannose	376	Q	0.398674	0.174997
Methotrexate	376	Residual	0.290565	0.0156355
Methotrexate	376	Repeatibility	0.375073	0.104214
Methotrexate	376	A ○ A	2.80557e-10	0.0993985
Methotrexate	376	A	0.0991091	0.0307463
Methotrexate	376	Q	0.235253	0.117073
Neomycin	376	Residual	0.247234	0.0132373
Neomycin	376	Repeatibility	0.0392255	0.0706132
Neomycin	376	A ○ A	0.196276	0.0739187
Neomycin	376	A	0.0888034	0.0242475
Neomycin	376	Q	0.428461	0.180153
Paraquat	376	Residual	0.0649905	0.00347121
Paraquat	376	Repeatibility	0.187708	0.0509983
Paraquat	376	A ○ A	0.033254	0.0498164
Paraquat	376	A	0.0543066	0.0162039
Paraquat	376	Q	0.659741	0.245924
Raffinose	376	Residual	0.137947	0.00741361
Raffinose	376	Repeatibility	0.231396	0.0614483
Raffinose	376	A ○ A	1.79112e-10	0.0587096
Raffinose	376	A	0.079143	0.0214435
Raffinose	376	Q	0.551514	0.229808
SDS	376	Residual	0.133826	0.00711765
SDS	376	Repeatibility	0.238631	0.082814
SDS	376	A ○ A	0.0894208	0.0818763
SDS	376	A	0.154187	0.0354815
SDS	376	Q	0.383935	0.158365
Sorbitol	376	Residual	0.202652	0.0108072
Sorbitol	376	Repeatibility	0.171439	0.0719974
Sorbitol	376	A ○ A	0.0880536	0.0715425
Sorbitol	376	A	0.0680745	0.0217471
Sorbitol	376	Q	0.469781	0.171815
Sucrose	376	Residual	0.266793	0.0149368
Sucrose	376	Repeatibility	0.160651	0.0677589
Sucrose	376	A ○ A	0.0513693	0.0655821
Sucrose	376	A	0.0216973	0.0136191
Sucrose	376	Q	0.499489	0.192495
Trehalose	376	Residual	0.285668	0.0152774
Trehalose	376	Repeatibility	0.379469	0.124005
Trehalose	376	A ○ A	0.153921	0.123444
Trehalose	376	A	0.0194069	0.0195839
Trehalose	376	Q	0.161535	0.117423
Tunicamycin	376	Residual	0.164081	0.00892786
Tunicamycin	376	Repeatibility	0.0978819	0.0536553
Tunicamycin	376	A ○ A	0.0618508	0.0532492
Tunicamycin	376	A	0.142485	0.0288754
Tunicamycin	376	Q	0.533702	0.184642
Xylose	376	Residual	0.344243	0.0185358
Xylose	376	Repeatibility	0.402167	0.119533
Xylose	376	A ○ A	0.0560475	0.115757
Xylose	376	A	0.0454086	0.023446
Xylose	376	Q	0.152134	0.127371
YNB	376	Residual	0.487741	0.0259048
YNB	376	Repeatibility	0.165959	0.108167
YNB	376	A ○ A	0.133496	0.107498
YNB	376	A	0.116508	0.0329245
YNB	376	Q	0.0962959	0.0726455
YNB ph3	376	Residual	0.802558	0.042674
YNB ph3	376	Repeatibility	0.0781913	0.0933363
YNB ph3	376	A ○ A	7.23973e-07	0.0868831
YNB ph3	376	A	0.0421489	0.0191648
YNB ph3	376	Q	0.0771009	0.0655011
YNB ph8	376	Residual	0.694033	0.0369865
YNB ph8	376	Repeatibility	0.0108236	0.0764941
YNB ph8	376	A ○ A	0.0336264	0.0730421
YNB ph8	376	A	0.0368907	0.0165201
YNB ph8	376	Q	0.224627	0.10927
YPD	376	Residual	0.26714	0.0141977
YPD	376	Repeatibility	0.239103	0.0750727
YPD	376	A ○ A	0.00182307	0.068225
YPD	376	A	0.0760865	0.0230399
YPD	376	Q	0.415848	0.182381
YPD 15C	376	Residual	0.332943	0.017718
YPD 15C	376	Repeatibility	0.0917885	0.0805766
YPD 15C	376	A ○ A	0.154588	0.0817444
YPD 15C	376	A	0.0655433	0.0223568
YPD 15C	376	Q	0.355137	0.150191
YPD 37C	376	Residual	0.146484	0.00788195
YPD 37C	376	Repeatibility	0.126003	0.0509635
YPD 37C	376	A ○ A	0.0692453	0.0508892
YPD 37C	376	A	0.0228618	0.0105865
YPD 37C	376	Q	0.635406	0.450876
Zeocin	376	Residual	0.0934203	0.00496866
Zeocin	376	Repeatibility	0.18404	0.0660922
Zeocin	376	A ○ A	0.105258	0.0667879
Zeocin	376	A	0.0594694	0.0194093
Zeocin	376	Q	0.557812	0.208519
6-azauracil	B	Residual	0.262651	0.0120864
6-azauracil	B	Repeatibility	0.0893872	0.0264733
6-azauracil	B	A ○ A	0.199103	0.0314038
6-azauracil	B	A	0.083014	0.0215218
6-azauracil	B	Q	0.365844	0.148784
Cadmium Chloride	B	Residual	0.282385	0.0130295
Cadmium Chloride	B	Repeatibility	0.0250708	0.0203443
Cadmium Chloride	B	A ○ A	0.130809	0.0227781
Cadmium Chloride	B	A	0.0829699	0.0199115
Cadmium Chloride	B	Q	0.478765	0.144302
Caffeine	B	Residual	0.122403	0.00565624
Caffeine	B	Repeatibility	0.110844	0.0187835
Caffeine	B	A ○ A	0.0886965	0.0199295
Caffeine	B	A	0.0316136	0.0105276
Caffeine	B	Q	0.646443	0.232113
Cobalt Chloride	B	Residual	0.0818275	0.00376593
Cobalt Chloride	B	Repeatibility	0.0791825	0.013797
Cobalt Chloride	B	A ○ A	0.0772559	0.0153901
Cobalt Chloride	B	A	0.0723009	0.0157459
Cobalt Chloride	B	Q	0.689433	0.195842
Congo Red	B	Residual	0.228919	0.0105341
Congo Red	B	Repeatibility	0.0590096	0.0212584
Congo Red	B	A ○ A	0.185964	0.0262958
Congo Red	B	A	0.0540746	0.0156221
Congo Red	B	Q	0.472033	0.196527
Diamide	B	Residual	0.0950683	0.00437456
Diamide	B	Repeatibility	0.0244659	0.00869658
Diamide	B	A ○ A	0.0680044	0.0103585
Diamide	B	A	0.0189927	0.00585551
Diamide	B	Q	0.793469	0.29642
EGTA	B	Residual	0.230929	0.0106315
EGTA	B	Repeatibility	0.0652145	0.0216114
EGTA	B	A ○ A	0.15528	0.0252005
EGTA	B	A	0.05537	0.0164959
EGTA	B	Q	0.493207	0.150652
EtOH	B	Residual	0.173017	0.00796101
EtOH	B	Repeatibility	0.0669659	0.016752
EtOH	B	A ○ A	0.0503317	0.0162303
EtOH	B	A	0.0992091	0.0192285
EtOH	B	Q	0.610476	0.197255
EtOH Glu	B	Residual	0.154467	0.00709055
EtOH Glu	B	Repeatibility	0.0949293	0.0192574
EtOH Glu	B	A ○ A	0.0994247	0.0208056
EtOH Glu	B	A	0.0528646	0.0141526
EtOH Glu	B	Q	0.598314	0.212588
Fluconazole	B	Residual	0.05689	0.00261975
Fluconazole	B	Repeatibility	0.0660903	0.0114919
Fluconazole	B	A ○ A	0.116604	0.0151794
Fluconazole	B	A	0.0281446	0.00837917
Fluconazole	B	Q	0.732271	0.347121
Formamide	B	Residual	0.669495	0.0308041
Formamide	B	Repeatibility	5.62919e-10	0.0377304
Formamide	B	A ○ A	0.143076	0.0357184
Formamide	B	A	0.012771	0.0104689
Formamide	B	Q	0.174658	0.084981
Fructose	B	Residual	0.186121	0.00854757
Fructose	B	Repeatibility	0.0553251	0.0179095
Fructose	B	A ○ A	0.138748	0.0213939
Fructose	B	A	0.0522256	0.0145256
Fructose	B	Q	0.567581	0.183748
Galactose	B	Residual	0.038904	0.00178498
Galactose	B	Repeatibility	0.0641569	0.00825027
Galactose	B	A ○ A	0.0064569	0.00712049
Galactose	B	A	0.0872417	0.0134375
Galactose	B	Q	0.80324	0.317826
Glycerol	B	Residual	0.248318	0.0114082
Glycerol	B	Repeatibility	0.0743825	0.0210381
Glycerol	B	A ○ A	0.0597708	0.0199457
Glycerol	B	A	0.0505758	0.0141834
Glycerol	B	Q	0.566953	0.173659
Lactate	B	Residual	0.263855	0.0121203
Lactate	B	Repeatibility	0.0225133	0.0173644
Lactate	B	A ○ A	0.0591368	0.0165845
Lactate	B	A	0.0442626	0.0122543
Lactate	B	Q	0.610232	0.175928
Lithium Chloride	B	Residual	0.0696981	0.00320618
Lithium Chloride	B	Repeatibility	0.121841	0.0163916
Lithium Chloride	B	A ○ A	0.0629767	0.0167802
Lithium Chloride	B	A	0.0265406	0.00923482
Lithium Chloride	B	Q	0.718943	0.230205
Magnesium Chloride	B	Residual	0.234501	0.0107799
Magnesium Chloride	B	Repeatibility	0.0837605	0.0238255
Magnesium Chloride	B	A ○ A	0.157247	0.0272962
Magnesium Chloride	B	A	0.0925677	0.0218614
Magnesium Chloride	B	Q	0.431924	0.158279
Maltose	B	Residual	0.034556	0.00158717
Maltose	B	Repeatibility	0.0441581	0.00785717
Maltose	B	A ○ A	0.11137	0.0119894
Maltose	B	A	0.0355015	0.00905014
Maltose	B	Q	0.774414	0.26239
Manganese Sulfate	B	Residual	0.116546	0.00534716
Manganese Sulfate	B	Repeatibility	0.0597743	0.0144259
Manganese Sulfate	B	A ○ A	0.109018	0.0175715
Manganese Sulfate	B	A	0.127347	0.0239152
Manganese Sulfate	B	Q	0.587315	0.164066
Mannose	B	Residual	0.217258	0.00996756
Mannose	B	Repeatibility	0.066571	0.0207402
Mannose	B	A ○ A	0.141033	0.0238434
Mannose	B	A	0.0595776	0.0163406
Mannose	B	Q	0.51556	0.167738
Methotrexate	B	Residual	0.124052	0.00571457
Methotrexate	B	Repeatibility	0.106471	0.0173959
Methotrexate	B	A ○ A	0.0579466	0.017222
Methotrexate	B	A	0.0210559	0.00833612
Methotrexate	B	Q	0.690475	0.221371
Neomycin	B	Residual	0.192459	0.00908023
Neomycin	B	Repeatibility	0.0890188	0.0221675
Neomycin	B	A ○ A	0.123921	0.0246731
Neomycin	B	A	0.179835	0.0330829
Neomycin	B	Q	0.414766	0.131269
Paraquat	B	Residual	0.0501592	0.00230738
Paraquat	B	Repeatibility	0.0768129	0.0111208
Paraquat	B	A ○ A	0.049276	0.0117644
Paraquat	B	A	0.0396677	0.00992276
Paraquat	B	Q	0.784084	0.216422
Raffinose	B	Residual	0.0821127	0.00377122
Raffinose	B	Repeatibility	0.0642658	0.0118318
Raffinose	B	A ○ A	0.0390583	0.0119057
Raffinose	B	A	0.153682	0.023827
Raffinose	B	Q	0.660881	0.187575
SDS	B	Residual	0.207781	0.00975096
SDS	B	Repeatibility	0.00774737	0.0146852
SDS	B	A ○ A	0.11614	0.0172681
SDS	B	A	0.0554232	0.0131332
SDS	B	Q	0.612909	0.258773
Sorbitol	B	Residual	0.169631	0.00784347
Sorbitol	B	Repeatibility	0.222157	0.0319645
Sorbitol	B	A ○ A	0.105854	0.0318161
Sorbitol	B	A	0.0774316	0.0210797
Sorbitol	B	Q	0.424926	0.156032
Sucrose	B	Residual	0.158481	0.00759709
Sucrose	B	Repeatibility	0.0481822	0.0139112
Sucrose	B	A ○ A	0.0400281	0.0131463
Sucrose	B	A	0.0186503	0.00672218
Sucrose	B	Q	0.734658	0.239283
Trehalose	B	Residual	0.200923	0.00924678
Trehalose	B	Repeatibility	0.243698	0.0339976
Trehalose	B	A ○ A	0.0812674	0.032109
Trehalose	B	A	0.0538305	0.0172452
Trehalose	B	Q	0.420281	0.192057
Tunicamycin	B	Residual	0.122804	0.00564835
Tunicamycin	B	Repeatibility	0.0619283	0.0141166
Tunicamycin	B	A ○ A	0.0735228	0.0153268
Tunicamycin	B	A	0.0614384	0.0144092
Tunicamycin	B	Q	0.680307	0.186486
Xylose	B	Residual	0.336963	0.0154745
Xylose	B	Repeatibility	0.229062	0.0373205
Xylose	B	A ○ A	0.0460451	0.0325331
Xylose	B	A	0.0440378	0.0163378
Xylose	B	Q	0.343892	0.134449
YNB	B	Residual	0.492996	0.0225846
YNB	B	Repeatibility	0.0542226	0.0356681
YNB	B	A ○ A	0.243597	0.039915
YNB	B	A	0.0239935	0.0136242
YNB	B	Q	0.18519	0.0863342
YNB ph3	B	Residual	0.675236	0.0309332
YNB ph3	B	Repeatibility	0.1532	0.0486941
YNB ph3	B	A ○ A	0.0783521	0.0423208
YNB ph3	B	A	0.0743244	0.0222203
YNB ph3	B	Q	0.0188873	0.0209211
YNB ph8	B	Residual	0.748196	0.0344342
YNB ph8	B	Repeatibility	0.0324272	0.0399518
YNB ph8	B	A ○ A	0.0322254	0.0310933
YNB ph8	B	A	0.0158234	0.0106255
YNB ph8	B	Q	0.171328	0.088155
YPD	B	Residual	0.240578	0.0110319
YPD	B	Repeatibility	0.0571742	0.0214452
YPD	B	A ○ A	0.16798	0.025541
YPD	B	A	0.0494436	0.0149681
YPD	B	Q	0.484825	0.175566
YPD 15C	B	Residual	0.3429	0.0157397
YPD 15C	B	Repeatibility	0.217856	0.0394623
YPD 15C	B	A ○ A	0.108359	0.0377032
YPD 15C	B	A	0.0588179	0.0196048
YPD 15C	B	Q	0.272067	0.111722
Zeocin	B	Residual	0.16126	0.00740949
Zeocin	B	Repeatibility	0.111252	0.0189266
Zeocin	B	A ○ A	0.0234551	0.0166302
Zeocin	B	A	0.0882122	0.0187098
Zeocin	B	Q	0.615821	0.173075
6-azauracil	377	Residual	0.300161	0.0146707
6-azauracil	377	Repeatibility	0.271555	0.075295
6-azauracil	377	A ○ A	0.0421511	0.07258
6-azauracil	377	A	0.0604588	0.0204128
6-azauracil	377	Q	0.325675	0.16677
Cadmium Chloride	377	Residual	0.219156	0.0108172
Cadmium Chloride	377	Repeatibility	0.243619	0.0608907
Cadmium Chloride	377	A ○ A	7.46635e-10	0.0576104
Cadmium Chloride	377	A	0.110178	0.0255709
Cadmium Chloride	377	Q	0.427046	0.172552
Caffeine	377	Residual	0.110954	0.00548493
Caffeine	377	Repeatibility	0.17371	0.052758
Caffeine	377	A ○ A	0.0861121	0.0529083
Caffeine	377	A	0.0733219	0.019174
Caffeine	377	Q	0.555902	0.208882
Cobalt Chloride	377	Residual	0.106944	0.00527119
Cobalt Chloride	377	Repeatibility	0.227236	0.0599981
Cobalt Chloride	377	A ○ A	0.0816381	0.0596424
Cobalt Chloride	377	A	0.0749122	0.0203156
Cobalt Chloride	377	Q	0.50927	0.236954
Congo Red	377	Residual	0.265961	0.0129917
Congo Red	377	Repeatibility	0.206672	0.0647631
Congo Red	377	A ○ A	0.0534739	0.062785
Congo Red	377	A	0.0640177	0.0197219
Congo Red	377	Q	0.409876	0.171802
Copper Sulfate	377	Residual	0.139007	0.00678279
Copper Sulfate	377	Repeatibility	0.349895	0.078803
Copper Sulfate	377	A ○ A	0.074752	0.0771993
Copper Sulfate	377	A	0.0468529	0.0189261
Copper Sulfate	377	Q	0.389493	0.178228
Diamide	377	Residual	0.273516	0.013415
Diamide	377	Repeatibility	0.247172	0.0798014
Diamide	377	A ○ A	0.112819	0.0792622
Diamide	377	A	0.0574146	0.0203742
Diamide	377	Q	0.309078	0.168775
EGTA	377	Residual	0.164944	0.00805764
EGTA	377	Repeatibility	0.2408	0.0603343
EGTA	377	A ○ A	0.0504452	0.0586911
EGTA	377	A	0.03867	0.0158006
EGTA	377	Q	0.50514	0.172818
EtOH	377	Residual	0.253011	0.0123454
EtOH	377	Repeatibility	0.213902	0.0752908
EtOH	377	A ○ A	0.110575	0.0749572
EtOH	377	A	0.106652	0.0274502
EtOH	377	Q	0.315861	0.140385
EtOH Glu	377	Residual	0.265767	0.0130049
EtOH Glu	377	Repeatibility	0.3174	0.0763569
EtOH Glu	377	A ○ A	0.0245544	0.0724767
EtOH Glu	377	A	0.0517331	0.0191002
EtOH Glu	377	Q	0.340545	0.200085
Fluconazole	377	Residual	0.132246	0.00652564
Fluconazole	377	Repeatibility	0.157277	0.060165
Fluconazole	377	A ○ A	0.15853	0.062248
Fluconazole	377	A	0.0424732	0.0151851
Fluconazole	377	Q	0.509474	0.259622
Formamide	377	Residual	0.560435	0.0294717
Formamide	377	Repeatibility	0.114308	0.0940581
Formamide	377	A ○ A	0.149418	0.0930942
Formamide	377	A	0.0848664	0.0262939
Formamide	377	Q	0.090972	0.0682704
Fructose	377	Residual	0.304296	0.014881
Fructose	377	Repeatibility	0.195277	0.0712583
Fructose	377	A ○ A	0.0870165	0.0701884
Fructose	377	A	0.068433	0.0213831
Fructose	377	Q	0.344977	0.146119
Galactose	377	Residual	0.0993222	0.00484926
Galactose	377	Repeatibility	0.384166	0.0694057
Galactose	377	A ○ A	8.67785e-11	0.0657973
Galactose	377	A	0.0484486	0.0174264
Galactose	377	Q	0.468063	0.298687
Glycerol	377	Residual	0.268922	0.0131293
Glycerol	377	Repeatibility	0.344073	0.0869212
Glycerol	377	A ○ A	0.0374017	0.0826806
Glycerol	377	A	0.134768	0.0324748
Glycerol	377	Q	0.214835	0.140457
Lactate	377	Residual	0.360348	0.0175824
Lactate	377	Repeatibility	0.234985	0.0711337
Lactate	377	A ○ A	1.49769e-07	0.0670478
Lactate	377	A	0.124401	0.0291487
Lactate	377	Q	0.280265	0.125168
Lithium Chloride	377	Residual	0.0643423	0.00317541
Lithium Chloride	377	Repeatibility	0.258301	0.0493882
Lithium Chloride	377	A ○ A	0.00971885	0.0468356
Lithium Chloride	377	A	0.0449547	0.0148796
Lithium Chloride	377	Q	0.622683	0.20604
Magnesium Chloride	377	Residual	0.239555	0.0148702
Magnesium Chloride	377	Repeatibility	0.245106	0.0842192
Magnesium Chloride	377	A ○ A	0.108925	0.0830893
Magnesium Chloride	377	A	0.0821094	0.0248411
Magnesium Chloride	377	Q	0.324305	0.166634
Maltose	377	Residual	0.120391	0.00587443
Maltose	377	Repeatibility	0.239542	0.066088
Maltose	377	A ○ A	0.1129	0.0663186
Maltose	377	A	0.0476028	0.0171781
Maltose	377	Q	0.479564	0.202781
Manganese Sulfate	377	Residual	0.232344	0.0113305
Manganese Sulfate	377	Repeatibility	0.23598	0.0738193
Manganese Sulfate	377	A ○ A	0.110269	0.073478
Manganese Sulfate	377	A	0.0462906	0.0183512
Manganese Sulfate	377	Q	0.375116	0.164202
Mannose	377	Residual	0.283384	0.0138904
Mannose	377	Repeatibility	0.260668	0.0745117
Mannose	377	A ○ A	0.0490007	0.0719899
Mannose	377	A	0.0781211	0.0230251
Mannose	377	Q	0.328826	0.159512
Methotrexate	377	Residual	0.145036	0.00731549
Methotrexate	377	Repeatibility	0.311742	0.0638786
Methotrexate	377	A ○ A	5.79335e-11	0.0605169
Methotrexate	377	A	0.0672803	0.0198453
Methotrexate	377	Q	0.475942	0.206956
Neomycin	377	Residual	0.131373	0.00660523
Neomycin	377	Repeatibility	0.194066	0.053978
Neomycin	377	A ○ A	0.0696776	0.0533685
Neomycin	377	A	0.0471563	0.0152432
Neomycin	377	Q	0.557727	0.252422
Paraquat	377	Residual	0.148977	0.00740634
Paraquat	377	Repeatibility	0.181737	0.046544
Paraquat	377	A ○ A	0.0215653	0.0446466
Paraquat	377	A	0.0488456	0.0151889
Paraquat	377	Q	0.598875	0.193521
Raffinose	377	Residual	0.154757	0.00767312
Raffinose	377	Repeatibility	0.338911	0.0684994
Raffinose	377	A ○ A	0.00298184	0.0591003
Raffinose	377	A	0.0564426	0.019007
Raffinose	377	Q	0.446908	0.2039
SDS	377	Residual	0.227549	0.0111095
SDS	377	Repeatibility	0.358433	0.0920212
SDS	377	A ○ A	0.0811162	0.0898619
SDS	377	A	0.118755	0.0313224
SDS	377	Q	0.214147	0.106242
Sorbitol	377	Residual	0.172807	0.00855777
Sorbitol	377	Repeatibility	0.324801	0.0776189
Sorbitol	377	A ○ A	0.0562364	0.0755104
Sorbitol	377	A	0.087509	0.0256432
Sorbitol	377	Q	0.358647	0.141785
Sucrose	377	Residual	0.283942	0.0138781
Sucrose	377	Repeatibility	0.243644	0.0749213
Sucrose	377	A ○ A	0.0779642	0.073396
Sucrose	377	A	0.0569944	0.0197604
Sucrose	377	Q	0.337456	0.172511
Trehalose	377	Residual	0.28422	0.014088
Trehalose	377	Repeatibility	0.387436	0.0881289
Trehalose	377	A ○ A	0.0113718	0.0825823
Trehalose	377	A	0.0703601	0.0237987
Trehalose	377	Q	0.246612	0.136257
Tunicamycin	377	Residual	0.174627	0.00856488
Tunicamycin	377	Repeatibility	0.0463319	0.0512112
Tunicamycin	377	A ○ A	0.178765	0.0552112
Tunicamycin	377	A	0.121734	0.0261753
Tunicamycin	377	Q	0.478542	0.157261
Xylose	377	Residual	0.320008	0.0157779
Xylose	377	Repeatibility	0.395321	0.0949231
Xylose	377	A ○ A	0.0234566	0.0907212
Xylose	377	A	0.0878057	0.0272793
Xylose	377	Q	0.173409	0.104787
YNB	377	Residual	0.41613	0.020293
YNB	377	Repeatibility	0.211904	0.0885727
YNB	377	A ○ A	0.109627	0.0871857
YNB	377	A	0.125944	0.0312886
YNB	377	Q	0.136396	0.0900609
YNB ph3	377	Residual	0.701737	0.0342378
YNB ph3	377	Repeatibility	0.126767	0.0755608
YNB ph3	377	A ○ A	9.11786e-10	0.0697422
YNB ph3	377	A	0.0189571	0.0128641
YNB ph3	377	Q	0.152539	0.126226
YNB ph8	377	Residual	0.658172	0.0321127
YNB ph8	377	Repeatibility	0.172989	0.0806397
YNB ph8	377	A ○ A	0.00227847	0.0642117
YNB ph8	377	A	0.0338911	0.0162454
YNB ph8	377	Q	0.132669	0.110467
YPD	377	Residual	0.338856	0.0165247
YPD	377	Repeatibility	0.256654	0.079964
YPD	377	A ○ A	0.0679317	0.0777241
YPD	377	A	0.0615642	0.0210897
YPD	377	Q	0.274994	0.141976
YPD 15C	377	Residual	0.248637	0.0154723
YPD 15C	377	Repeatibility	0.401349	0.0909059
YPD 15C	377	A ○ A	2.93749e-05	0.0857361
YPD 15C	377	A	0.0509922	0.0210798
YPD 15C	377	Q	0.298992	0.15366
YPD 37C	377	Residual	0.32601	0.0159252
YPD 37C	377	Repeatibility	0.384872	0.0856252
YPD 37C	377	A ○ A	8.63418e-11	0.0807682
YPD 37C	377	A	0.0230181	0.0161862
YPD 37C	377	Q	0.2661	0.117474
Zeocin	377	Residual	0.124826	0.00610167
Zeocin	377	Repeatibility	0.431182	0.0869966
Zeocin	377	A ○ A	0.0433519	0.0840372
Zeocin	377	A	0.0674134	0.0238053
Zeocin	377	Q	0.333226	0.136272
6-azauracil	393	Residual	0.241311	0.0116558
6-azauracil	393	Repeatibility	0.373307	0.0741313
6-azauracil	393	A ○ A	0.0503757	0.0706125
6-azauracil	393	A	0.0324228	0.0169263
6-azauracil	393	Q	0.302584	0.13946
Cadmium Chloride	393	Residual	0.0784529	0.00378091
Cadmium Chloride	393	Repeatibility	0.0839273	0.0268318
Cadmium Chloride	393	A ○ A	0.0775517	0.0278627
Cadmium Chloride	393	A	0.00990119	0.00577958
Cadmium Chloride	393	Q	0.750167	0.307784
Caffeine	393	Residual	0.193184	0.00934696
Caffeine	393	Repeatibility	0.230831	0.0575108
Caffeine	393	A ○ A	0.0593495	0.0556697
Caffeine	393	A	0.134682	0.030468
Caffeine	393	Q	0.381954	0.138384
Cobalt Chloride	393	Residual	0.150887	0.00727154
Cobalt Chloride	393	Repeatibility	0.172853	0.0410156
Cobalt Chloride	393	A ○ A	0.0180601	0.038833
Cobalt Chloride	393	A	0.133013	0.0279392
Cobalt Chloride	393	Q	0.525188	0.141444
Congo Red	393	Residual	0.31417	0.0151487
Congo Red	393	Repeatibility	0.34187	0.0766387
Congo Red	393	A ○ A	0.0508387	0.072971
Congo Red	393	A	0.0642752	0.0225458
Congo Red	393	Q	0.228846	0.112763
Copper Sulfate	393	Residual	0.0201498	0.000970577
Copper Sulfate	393	Repeatibility	0.141459	0.0226536
Copper Sulfate	393	A ○ A	0.0169074	0.0217336
Copper Sulfate	393	A	0.00936032	0.00475459
Copper Sulfate	393	Q	0.812123	0.812627
Diamide	393	Residual	0.31365	0.0151407
Diamide	393	Repeatibility	0.428079	0.0806315
Diamide	393	A ○ A	4.12909e-05	0.0747128
Diamide	393	A	0.0553047	0.021322
Diamide	393	Q	0.202925	0.112484
EGTA	393	Residual	0.189492	0.00915283
EGTA	393	Repeatibility	0.250628	0.0592976
EGTA	393	A ○ A	0.0819001	0.0582274
EGTA	393	A	0.0408197	0.0164435
EGTA	393	Q	0.437161	0.159063
EtOH	393	Residual	0.331633	0.0159981
EtOH	393	Repeatibility	0.228397	0.0596878
EtOH	393	A ○ A	0.0295984	0.0562241
EtOH	393	A	0.0536721	0.0183728
EtOH	393	Q	0.3567	0.150035
EtOH Glu	393	Residual	0.259703	0.0125787
EtOH Glu	393	Repeatibility	0.257749	0.0668454
EtOH Glu	393	A ○ A	0.111409	0.0660874
EtOH Glu	393	A	0.0118442	0.0121788
EtOH Glu	393	Q	0.359295	0.150104
Fluconazole	393	Residual	0.14878	0.00716586
Fluconazole	393	Repeatibility	0.107016	0.0345745
Fluconazole	393	A ○ A	0.0569542	0.0342165
Fluconazole	393	A	0.0525388	0.014861
Fluconazole	393	Q	0.634711	0.18401
Formamide	393	Residual	0.438094	0.0211408
Formamide	393	Repeatibility	0.157088	0.0530714
Formamide	393	A ○ A	2.70257e-10	0.0484055
Formamide	393	A	0.0383217	0.0147984
Formamide	393	Q	0.366495	0.153418
Fructose	393	Residual	0.266129	0.0128456
Fructose	393	Repeatibility	0.200643	0.0522852
Fructose	393	A ○ A	0.0425358	0.0501047
Fructose	393	A	0.033488	0.0140755
Fructose	393	Q	0.457203	0.176588
Galactose	393	Residual	0.0826346	0.0039916
Galactose	393	Repeatibility	0.147824	0.0330557
Galactose	393	A ○ A	0.0486145	0.0326019
Galactose	393	A	0.028903	0.00988029
Galactose	393	Q	0.692024	0.328325
Glycerol	393	Residual	0.37358	0.0183463
Glycerol	393	Repeatibility	0.10467	0.0585814
Glycerol	393	A ○ A	0.124576	0.0587351
Glycerol	393	A	0.0406198	0.0161604
Glycerol	393	Q	0.356554	0.139054
Lactate	393	Residual	0.410384	0.0198059
Lactate	393	Repeatibility	0.0873269	0.060273
Lactate	393	A ○ A	0.129722	0.0603957
Lactate	393	A	0.0737265	0.0214656
Lactate	393	Q	0.298841	0.126923
Lithium Chloride	393	Residual	0.114495	0.00551157
Lithium Chloride	393	Repeatibility	0.0678229	0.0305292
Lithium Chloride	393	A ○ A	0.0916514	0.0317845
Lithium Chloride	393	A	0.03431	0.0115643
Lithium Chloride	393	Q	0.691721	0.185716
Magnesium Chloride	393	Residual	0.261086	0.0125816
Magnesium Chloride	393	Repeatibility	0.213509	0.0519544
Magnesium Chloride	393	A ○ A	0.0243591	0.0488726
Magnesium Chloride	393	A	0.0459145	0.0165515
Magnesium Chloride	393	Q	0.455131	0.156508
Maltose	393	Residual	0.396524	0.019129
Maltose	393	Repeatibility	0.339799	0.0765818
Maltose	393	A ○ A	0.0124149	0.0712068
Maltose	393	A	0.0600932	0.0213853
Maltose	393	Q	0.191169	0.106055
Manganese Sulfate	393	Residual	0.0780651	0.00376017
Manganese Sulfate	393	Repeatibility	0.163178	0.0359277
Manganese Sulfate	393	A ○ A	0.0466534	0.0352624
Manganese Sulfate	393	A	0.0575199	0.0154832
Manganese Sulfate	393	Q	0.654584	0.216658
Mannose	393	Residual	0.27123	0.0130854
Mannose	393	Repeatibility	0.259534	0.065881
Mannose	393	A ○ A	0.0810488	0.0643378
Mannose	393	A	0.0449811	0.0178592
Mannose	393	Q	0.343206	0.150645
Methotrexate	393	Residual	0.457246	0.0230542
Methotrexate	393	Repeatibility	0.124962	0.0562631
Methotrexate	393	A ○ A	0.00828606	0.050559
Methotrexate	393	A	0.109172	0.0265392
Methotrexate	393	Q	0.300334	0.112801
Neomycin	393	Residual	0.0689718	0.00332982
Neomycin	393	Repeatibility	0.118147	0.0348601
Neomycin	393	A ○ A	0.0930706	0.0359974
Neomycin	393	A	0.0498904	0.0141392
Neomycin	393	Q	0.66992	0.22129
Paraquat	393	Residual	0.0624637	0.0030139
Paraquat	393	Repeatibility	0.111447	0.03287
Paraquat	393	A ○ A	0.0847425	0.0338204
Paraquat	393	A	0.0569693	0.015282
Paraquat	393	Q	0.684378	0.190885
Raffinose	393	Residual	0.208663	0.0100728
Raffinose	393	Repeatibility	0.189877	0.0555356
Raffinose	393	A ○ A	0.0921073	0.0551334
Raffinose	393	A	0.0779925	0.0224191
Raffinose	393	Q	0.431359	0.139492
SDS	393	Residual	0.299401	0.0144363
SDS	393	Repeatibility	0.231489	0.0660605
SDS	393	A ○ A	0.0908082	0.0645884
SDS	393	A	0.0537911	0.0196456
SDS	393	Q	0.32451	0.123691
Sorbitol	393	Residual	0.24358	0.0117388
Sorbitol	393	Repeatibility	0.390943	0.0749642
Sorbitol	393	A ○ A	0.0210466	0.0704169
Sorbitol	393	A	0.0741678	0.0244667
Sorbitol	393	Q	0.270263	0.112113
Sucrose	393	Residual	0.420592	0.0212745
Sucrose	393	Repeatibility	0.179549	0.0658823
Sucrose	393	A ○ A	0.06243	0.0628186
Sucrose	393	A	0.0542848	0.0189697
Sucrose	393	Q	0.283144	0.145461
Trehalose	393	Residual	0.438475	0.0212108
Trehalose	393	Repeatibility	0.382771	0.0854216
Trehalose	393	A ○ A	0.0302642	0.0800351
Trehalose	393	A	0.0267421	0.0165962
Trehalose	393	Q	0.121748	0.0887995
Tunicamycin	393	Residual	0.16137	0.00778544
Tunicamycin	393	Repeatibility	0.136418	0.0437166
Tunicamycin	393	A ○ A	0.0699463	0.0433543
Tunicamycin	393	A	0.137077	0.0283872
Tunicamycin	393	Q	0.495189	0.153611
Xylose	393	Residual	0.563167	0.0273964
Xylose	393	Repeatibility	0.260079	0.0819936
Xylose	393	A ○ A	0.0577265	0.077432
Xylose	393	A	0.0247728	0.0157354
Xylose	393	Q	0.0942544	0.0624387
YNB	393	Residual	0.474397	0.0228112
YNB	393	Repeatibility	0.299134	0.0760427
YNB	393	A ○ A	9.57431e-05	0.0700212
YNB	393	A	0.0861337	0.0255821
YNB	393	Q	0.140239	0.0749251
YNB ph3	393	Residual	0.514469	0.0247781
YNB ph3	393	Repeatibility	0.376227	0.0950303
YNB ph3	393	A ○ A	0.065013	0.0900012
YNB ph3	393	A	0.0442912	0.0205466
YNB ph3	393	Q	1.15681e-09	0.00159239
YNB ph8	393	Residual	0.482147	0.0232338
YNB ph8	393	Repeatibility	0.209856	0.0860395
YNB ph8	393	A ○ A	0.173219	0.0860112
YNB ph8	393	A	0.0603385	0.0223005
YNB ph8	393	Q	0.0744393	0.0557465
YPD	393	Residual	0.324349	0.0156216
YPD	393	Repeatibility	0.202021	0.0622341
YPD	393	A ○ A	0.0793044	0.060581
YPD	393	A	0.055186	0.0191194
YPD	393	Q	0.33914	0.143167
YPD 15C	393	Residual	0.341087	0.0164647
YPD 15C	393	Repeatibility	0.418688	0.0799564
YPD 15C	393	A ○ A	3.00339e-10	0.0739585
YPD 15C	393	A	0.034197	0.0176227
YPD 15C	393	Q	0.206028	0.122422
YPD 37C	393	Residual	0.314834	0.0151967
YPD 37C	393	Repeatibility	0.225144	0.064781
YPD 37C	393	A ○ A	0.0852859	0.0632903
YPD 37C	393	A	0.0414807	0.0171675
YPD 37C	393	Q	0.333255	0.140365
Zeocin	393	Residual	0.116657	0.0056318
Zeocin	393	Repeatibility	0.146276	0.0453386
Zeocin	393	A ○ A	0.105173	0.0461842
Zeocin	393	A	0.101784	0.0231711
Zeocin	393	Q	0.53011	0.198841
6-azauracil	381	Residual	0.209566	0.0096758
6-azauracil	381	Repeatibility	0.19695	0.0558762
6-azauracil	381	A ○ A	0.127923	0.0564326
6-azauracil	381	A	0.0549427	0.01785
6-azauracil	381	Q	0.410618	0.165485
Cadmium Chloride	381	Residual	0.0329253	0.00152342
Cadmium Chloride	381	Repeatibility	0.0416954	0.011339
Cadmium Chloride	381	A ○ A	0.031589	0.0116799
Cadmium Chloride	381	A	0.00621985	0.00275093
Cadmium Chloride	381	Q	0.88757	0.419019
Caffeine	381	Residual	0.160391	0.0074096
Caffeine	381	Repeatibility	0.0894621	0.0603957
Caffeine	381	A ○ A	0.306605	0.0669275
Caffeine	381	A	0.0706935	0.0210173
Caffeine	381	Q	0.372848	0.146565
Cobalt Chloride	381	Residual	0.137881	0.00636947
Cobalt Chloride	381	Repeatibility	0.217494	0.0393841
Cobalt Chloride	381	A ○ A	0.0026318	0.0345728
Cobalt Chloride	381	A	0.0967484	0.0212778
Cobalt Chloride	381	Q	0.545245	0.197692
Congo Red	381	Residual	0.244066	0.0112396
Congo Red	381	Repeatibility	0.228095	0.0447736
Congo Red	381	A ○ A	0.000108779	0.0410728
Congo Red	381	A	0.0315753	0.0125704
Congo Red	381	Q	0.496155	0.190817
Diamide	381	Residual	0.240756	0.0111094
Diamide	381	Repeatibility	0.218087	0.0442964
Diamide	381	A ○ A	0.000100316	0.040667
Diamide	381	A	0.0536322	0.0158685
Diamide	381	Q	0.487424	0.194899
EGTA	381	Residual	0.101552	0.004684
EGTA	381	Repeatibility	0.140784	0.0348275
EGTA	381	A ○ A	0.0658688	0.0348172
EGTA	381	A	0.0733953	0.0166338
EGTA	381	Q	0.618401	0.257682
EtOH	381	Residual	0.237203	0.0109563
EtOH	381	Repeatibility	0.158864	0.0422438
EtOH	381	A ○ A	0.037569	0.0400849
EtOH	381	A	0.0631621	0.0174125
EtOH	381	Q	0.503201	0.168076
EtOH Glu	381	Residual	0.192658	0.00888586
EtOH Glu	381	Repeatibility	0.184956	0.0461016
EtOH Glu	381	A ○ A	0.0697742	0.0451763
EtOH Glu	381	A	0.0535462	0.0160942
EtOH Glu	381	Q	0.499066	0.199687
Fluconazole	381	Residual	0.104168	0.00480962
Fluconazole	381	Repeatibility	0.103585	0.0318687
Fluconazole	381	A ○ A	0.0828142	0.0326311
Fluconazole	381	A	0.0536603	0.0138371
Fluconazole	381	Q	0.655772	0.222168
Formamide	381	Residual	0.474828	0.022081
Formamide	381	Repeatibility	0.150844	0.0513857
Formamide	381	A ○ A	7.17622e-05	0.0464349
Formamide	381	A	0.0442911	0.0157197
Formamide	381	Q	0.329964	0.120978
Fructose	381	Residual	0.213589	0.00984614
Fructose	381	Repeatibility	0.178262	0.0455201
Fructose	381	A ○ A	0.0617723	0.0442793
Fructose	381	A	0.0527101	0.0157088
Fructose	381	Q	0.493666	0.214098
Galactose	381	Residual	0.194043	0.00895433
Galactose	381	Repeatibility	0.19363	0.0457505
Galactose	381	A ○ A	0.062808	0.0445622
Galactose	381	A	0.0358196	0.013595
Galactose	381	Q	0.513699	0.185469
Glycerol	381	Residual	0.284532	0.0167001
Glycerol	381	Repeatibility	0.0783682	0.0620751
Glycerol	381	A ○ A	0.21811	0.0651061
Glycerol	381	A	0.0378692	0.0164459
Glycerol	381	Q	0.381121	0.13953
Lactate	381	Residual	0.411461	0.0190107
Lactate	381	Repeatibility	0.094672	0.0506968
Lactate	381	A ○ A	0.0879064	0.0494829
Lactate	381	A	0.0330271	0.013694
Lactate	381	Q	0.372933	0.140046
Lithium Chloride	381	Residual	0.032021	0.00148011
Lithium Chloride	381	Repeatibility	0.0523885	0.0185646
Lithium Chloride	381	A ○ A	0.076077	0.0200348
Lithium Chloride	381	A	0.0208709	0.00647132
Lithium Chloride	381	Q	0.818643	0.274615
Magnesium Chloride	381	Residual	0.254338	0.0117418
Magnesium Chloride	381	Repeatibility	0.204312	0.0450175
Magnesium Chloride	381	A ○ A	0.0113539	0.0408772
Magnesium Chloride	381	A	0.0524624	0.0159391
Magnesium Chloride	381	Q	0.477534	0.184499
Maltose	381	Residual	0.0382987	0.00176653
Maltose	381	Repeatibility	0.106376	0.0173445
Maltose	381	A ○ A	0.0101373	0.0163248
Maltose	381	A	0.0128518	0.00493811
Maltose	381	Q	0.832336	0.341051
Manganese Sulfate	381	Residual	0.0454184	0.00209055
Manganese Sulfate	381	Repeatibility	0.11946	0.0270712
Manganese Sulfate	381	A ○ A	0.0541389	0.0271727
Manganese Sulfate	381	A	0.0748384	0.0157238
Manganese Sulfate	381	Q	0.706145	0.246046
Mannose	381	Residual	0.235867	0.0109225
Mannose	381	Repeatibility	0.169712	0.0462251
Mannose	381	A ○ A	0.0645461	0.0450148
Mannose	381	A	0.04755	0.0152437
Mannose	381	Q	0.482325	0.186156
Methotrexate	381	Residual	0.310308	0.0143679
Methotrexate	381	Repeatibility	0.150855	0.0501427
Methotrexate	381	A ○ A	0.0609022	0.0478597
Methotrexate	381	A	0.0897499	0.0228631
Methotrexate	381	Q	0.388185	0.126151
Neomycin	381	Residual	0.0843105	0.00397253
Neomycin	381	Repeatibility	0.126849	0.0309545
Neomycin	381	A ○ A	0.0675144	0.0312776
Neomycin	381	A	0.0307875	0.0100768
Neomycin	381	Q	0.690538	0.246797
Paraquat	381	Residual	0.0823273	0.0037933
Paraquat	381	Repeatibility	0.102332	0.0207954
Paraquat	381	A ○ A	0.0102174	0.0195175
Paraquat	381	A	0.0373449	0.0100435
Paraquat	381	Q	0.767778	0.198206
Raffinose	381	Residual	0.109414	0.00507826
Raffinose	381	Repeatibility	0.20175	0.0332162
Raffinose	381	A ○ A	0.000428443	0.0222282
Raffinose	381	A	0.0292172	0.0109278
Raffinose	381	Q	0.65919	0.206969
SDS	381	Residual	0.063469	0.00292598
SDS	381	Repeatibility	0.0868985	0.026591
SDS	381	A ○ A	0.0828443	0.0276687
SDS	381	A	0.0421024	0.0106923
SDS	381	Q	0.724686	0.314139
Sorbitol	381	Residual	0.219716	0.01015
Sorbitol	381	Repeatibility	0.307684	0.0699822
Sorbitol	381	A ○ A	0.121006	0.0693983
Sorbitol	381	A	0.0657491	0.0225157
Sorbitol	381	Q	0.285845	0.107262
Sucrose	381	Residual	0.259995	0.0119971
Sucrose	381	Repeatibility	0.215944	0.0476332
Sucrose	381	A ○ A	0.0191169	0.0437086
Sucrose	381	A	0.0484896	0.0154756
Sucrose	381	Q	0.456455	0.189894
Trehalose	381	Residual	0.313543	0.014513
Trehalose	381	Repeatibility	0.34059	0.0705302
Trehalose	381	A ○ A	0.0514406	0.0670615
Trehalose	381	A	0.0527875	0.019804
Trehalose	381	Q	0.241639	0.112669
Tunicamycin	381	Residual	0.251702	0.0116085
Tunicamycin	381	Repeatibility	0.18445	0.0424075
Tunicamycin	381	A ○ A	0.00719247	0.0379512
Tunicamycin	381	A	0.0607971	0.0179116
Tunicamycin	381	Q	0.495858	0.14322
Xylose	381	Residual	0.38252	0.0176684
Xylose	381	Repeatibility	0.264757	0.0689856
Xylose	381	A ○ A	0.0871738	0.067007
Xylose	381	A	0.0309581	0.0157781
Xylose	381	Q	0.234591	0.103937
YNB	381	Residual	0.513333	0.0236394
YNB	381	Repeatibility	0.125143	0.0707304
YNB	381	A ○ A	0.159387	0.0704641
YNB	381	A	0.0637444	0.0209144
YNB	381	Q	0.138392	0.0733406
YNB ph3	381	Residual	0.594357	0.0273698
YNB ph3	381	Repeatibility	0.0882156	0.0576469
YNB ph3	381	A ○ A	0.0449846	0.0533921
YNB ph3	381	A	0.0658618	0.0191421
YNB ph3	381	Q	0.206581	0.113912
YNB ph8	381	Residual	0.637362	0.0293632
YNB ph8	381	Repeatibility	0.0733733	0.059964
YNB ph8	381	A ○ A	0.0618356	0.0561587
YNB ph8	381	A	0.0450653	0.0162403
YNB ph8	381	Q	0.182364	0.0892483
YPD	381	Residual	0.301975	0.0138995
YPD	381	Repeatibility	0.147614	0.0461024
YPD	381	A ○ A	0.0543622	0.0441918
YPD	381	A	0.041671	0.0141339
YPD	381	Q	0.454378	0.188885
YPD 15C	381	Residual	0.262428	0.0121038
YPD 15C	381	Repeatibility	0.312656	0.0600403
YPD 15C	381	A ○ A	0.026144	0.0562176
YPD 15C	381	A	0.0394777	0.0162586
YPD 15C	381	Q	0.359294	0.145214
Zeocin	381	Residual	0.465441	0.0214555
Zeocin	381	Repeatibility	0.325504	0.0799893
Zeocin	381	A ○ A	0.072143	0.0762853
Zeocin	381	A	0.0407391	0.0184409
Zeocin	381	Q	0.0961724	0.0589021
6-azauracil	3008	Residual	0.291251	0.0146605
6-azauracil	3008	Repeatibility	0.138016	0.0653589
6-azauracil	3008	A ○ A	0.146463	0.0664158
6-azauracil	3008	A	0.0564347	0.0198578
6-azauracil	3008	Q	0.367837	0.149121
Cadmium Chloride	3008	Residual	0.160564	0.00809255
Cadmium Chloride	3008	Repeatibility	0.128652	0.0443818
Cadmium Chloride	3008	A ○ A	0.0687917	0.0440517
Cadmium Chloride	3008	A	0.0719048	0.0194235
Cadmium Chloride	3008	Q	0.570087	0.181363
Caffeine	3008	Residual	0.208343	0.0104951
Caffeine	3008	Repeatibility	0.412305	0.0806739
Caffeine	3008	A ○ A	1.57666e-09	0.0754727
Caffeine	3008	A	0.103517	0.0295347
Caffeine	3008	Q	0.275835	0.13627
Cobalt Chloride	3008	Residual	0.196546	0.0103067
Cobalt Chloride	3008	Repeatibility	0.240752	0.0608141
Cobalt Chloride	3008	A ○ A	0.0453327	0.0583021
Cobalt Chloride	3008	A	0.0621033	0.0207577
Cobalt Chloride	3008	Q	0.455266	0.15754
Congo Red	3008	Residual	0.332115	0.0166872
Congo Red	3008	Repeatibility	0.180034	0.0654857
Congo Red	3008	A ○ A	0.0807269	0.0639765
Congo Red	3008	A	0.0514712	0.0191195
Congo Red	3008	Q	0.355653	0.144272
Copper Sulfate	3008	Residual	0.0217672	0.00109383
Copper Sulfate	3008	Repeatibility	0.0929507	0.0211407
Copper Sulfate	3008	A ○ A	0.0388878	0.0212823
Copper Sulfate	3008	A	0.0126529	0.00518499
Copper Sulfate	3008	Q	0.833741	0.681415
Diamide	3008	Residual	0.312296	0.0157377
Diamide	3008	Repeatibility	0.173371	0.0618737
Diamide	3008	A ○ A	0.0627185	0.0599407
Diamide	3008	A	0.0771562	0.0226207
Diamide	3008	Q	0.374458	0.146864
EGTA	3008	Residual	0.204928	0.01031
EGTA	3008	Repeatibility	0.217592	0.0675894
EGTA	3008	A ○ A	0.099507	0.0670494
EGTA	3008	A	0.131975	0.0323992
EGTA	3008	Q	0.345998	0.123604
EtOH	3008	Residual	0.178062	0.00898022
EtOH	3008	Repeatibility	0.167372	0.0542343
EtOH	3008	A ○ A	0.090465	0.0541301
EtOH	3008	A	0.0743957	0.0206724
EtOH	3008	Q	0.489706	0.213278
EtOH Glu	3008	Residual	0.193439	0.00971992
EtOH Glu	3008	Repeatibility	0.098621	0.0534843
EtOH Glu	3008	A ○ A	0.166322	0.0561213
EtOH Glu	3008	A	0.0414813	0.015991
EtOH Glu	3008	Q	0.500137	0.181263
Fluconazole	3008	Residual	0.23989	0.0120832
Fluconazole	3008	Repeatibility	0.154174	0.0645103
Fluconazole	3008	A ○ A	0.13493	0.0648514
Fluconazole	3008	A	0.0973777	0.0267257
Fluconazole	3008	Q	0.373629	0.131462
Formamide	3008	Residual	0.364222	0.0183417
Formamide	3008	Repeatibility	0.0534715	0.0592696
Formamide	3008	A ○ A	0.162952	0.0608733
Formamide	3008	A	0.0325761	0.0150208
Formamide	3008	Q	0.386779	0.155777
Fructose	3008	Residual	0.212521	0.0107044
Fructose	3008	Repeatibility	0.146829	0.0532542
Fructose	3008	A ○ A	0.0964055	0.0533427
Fructose	3008	A	0.0389985	0.0157372
Fructose	3008	Q	0.505246	0.168542
Galactose	3008	Residual	0.0498248	0.00250219
Galactose	3008	Repeatibility	0.165901	0.0405472
Galactose	3008	A ○ A	0.082508	0.0410281
Galactose	3008	A	0.021992	0.0100071
Galactose	3008	Q	0.679774	0.295415
Glycerol	3008	Residual	0.220735	0.0110782
Glycerol	3008	Repeatibility	0.274867	0.0852684
Glycerol	3008	A ○ A	0.178559	0.0865835
Glycerol	3008	A	0.0783277	0.026235
Glycerol	3008	Q	0.247512	0.12223
Lactate	3008	Residual	0.202791	0.0101961
Lactate	3008	Repeatibility	0.250367	0.0594187
Lactate	3008	A ○ A	0.0171463	0.0549061
Lactate	3008	A	0.108402	0.0269129
Lactate	3008	Q	0.421294	0.17151
Lithium Chloride	3008	Residual	0.0482167	0.00243514
Lithium Chloride	3008	Repeatibility	0.0487726	0.0294033
Lithium Chloride	3008	A ○ A	0.1374	0.0325364
Lithium Chloride	3008	A	0.0366768	0.0108275
Lithium Chloride	3008	Q	0.728934	0.345847
Magnesium Chloride	3008	Residual	0.208189	0.0104546
Magnesium Chloride	3008	Repeatibility	0.116651	0.0496304
Magnesium Chloride	3008	A ○ A	0.0903883	0.0497453
Magnesium Chloride	3008	A	0.0858053	0.0224184
Magnesium Chloride	3008	Q	0.498966	0.163943
Maltose	3008	Residual	0.0263291	0.00132473
Maltose	3008	Repeatibility	0.104638	0.0183289
Maltose	3008	A ○ A	0.000686629	0.0167864
Maltose	3008	A	0.0182247	0.00609211
Maltose	3008	Q	0.850122	0.302123
Manganese Sulfate	3008	Residual	0.0640558	0.00321485
Manganese Sulfate	3008	Repeatibility	0.157696	0.0479454
Manganese Sulfate	3008	A ○ A	0.108589	0.0491644
Manganese Sulfate	3008	A	0.10716	0.0258674
Manganese Sulfate	3008	Q	0.562498	0.163399
Mannose	3008	Residual	0.261933	0.0131688
Mannose	3008	Repeatibility	0.110017	0.0550217
Mannose	3008	A ○ A	0.119339	0.0556171
Mannose	3008	A	0.0471042	0.0172463
Mannose	3008	Q	0.461606	0.163207
Methotrexate	3008	Residual	0.31541	0.015961
Methotrexate	3008	Repeatibility	0.207678	0.0630933
Methotrexate	3008	A ○ A	0.035998	0.0600791
Methotrexate	3008	A	0.0658818	0.0213655
Methotrexate	3008	Q	0.375032	0.142454
Neomycin	3008	Residual	0.055989	0.00282233
Neomycin	3008	Repeatibility	0.137492	0.035153
Neomycin	3008	A ○ A	0.0708109	0.035589
Neomycin	3008	A	0.0187794	0.00891704
Neomycin	3008	Q	0.716928	0.273385
Paraquat	3008	Residual	0.0426046	0.00214632
Paraquat	3008	Repeatibility	0.168869	0.0310668
Paraquat	3008	A ○ A	7.37001e-08	0.0291254
Paraquat	3008	A	0.0732124	0.0162573
Paraquat	3008	Q	0.715314	0.295264
Raffinose	3008	Residual	0.119711	0.00601548
Raffinose	3008	Repeatibility	0.231817	0.0521539
Raffinose	3008	A ○ A	0.0412377	0.0501441
Raffinose	3008	A	0.056934	0.0189346
Raffinose	3008	Q	0.5503	0.164601
SDS	3008	Residual	0.47364	0.0238106
SDS	3008	Repeatibility	0.00673219	0.0714405
SDS	3008	A ○ A	0.258692	0.0802763
SDS	3008	A	0.115103	0.0303579
SDS	3008	Q	0.145833	0.0746648
Sorbitol	3008	Residual	0.19349	0.00978954
Sorbitol	3008	Repeatibility	0.396592	0.0772893
Sorbitol	3008	A ○ A	1.81628e-10	0.0723085
Sorbitol	3008	A	0.0987416	0.0287535
Sorbitol	3008	Q	0.311177	0.133755
Sucrose	3008	Residual	0.288541	0.0145324
Sucrose	3008	Repeatibility	0.17738	0.0608314
Sucrose	3008	A ○ A	0.078013	0.0596366
Sucrose	3008	A	0.0385456	0.0164855
Sucrose	3008	Q	0.417521	0.156947
Trehalose	3008	Residual	0.229545	0.0115984
Trehalose	3008	Repeatibility	0.260216	0.0759802
Trehalose	3008	A ○ A	0.122418	0.0757
Trehalose	3008	A	0.0673059	0.0230789
Trehalose	3008	Q	0.320515	0.148425
Tunicamycin	3008	Residual	0.124407	0.00625513
Tunicamycin	3008	Repeatibility	0.0993824	0.0403171
Tunicamycin	3008	A ○ A	0.0593989	0.0400816
Tunicamycin	3008	A	0.254195	0.0407399
Tunicamycin	3008	Q	0.462617	0.158957
Xylose	3008	Residual	0.242648	0.0122457
Xylose	3008	Repeatibility	0.354353	0.0885118
Xylose	3008	A ○ A	0.109736	0.0869131
Xylose	3008	A	0.0625496	0.0239367
Xylose	3008	Q	0.230713	0.128038
YNB	3008	Residual	0.375216	0.0188197
YNB	3008	Repeatibility	0.202774	0.0890444
YNB	3008	A ○ A	0.184489	0.0903488
YNB	3008	A	0.1289	0.0339158
YNB	3008	Q	0.108621	0.0739115
YNB ph3	3008	Residual	0.775885	0.0389161
YNB ph3	3008	Repeatibility	0.158485	0.0825576
YNB ph3	3008	A ○ A	1.61502e-09	0.0751064
YNB ph3	3008	A	0.0320938	0.0169138
YNB ph3	3008	Q	0.0335365	0.0354414
YNB ph8	3008	Residual	0.694216	0.0348198
YNB ph8	3008	Repeatibility	0.0147469	0.080719
YNB ph8	3008	A ○ A	0.175014	0.0801668
YNB ph8	3008	A	0.0388273	0.0179701
YNB ph8	3008	Q	0.0771963	0.0573527
YPD	3008	Residual	0.256631	0.0128795
YPD	3008	Repeatibility	0.123634	0.0596099
YPD	3008	A ○ A	0.146298	0.0609927
YPD	3008	A	0.0383961	0.0164464
YPD	3008	Q	0.435041	0.153935
YPD 15C	3008	Residual	0.700683	0.0352006
YPD 15C	3008	Repeatibility	0.105022	0.0805118
YPD 15C	3008	A ○ A	0.0569104	0.0757575
YPD 15C	3008	A	0.079933	0.0246442
YPD 15C	3008	Q	0.0574518	0.0500238
YPD 37C	3008	Residual	0.728168	0.0365996
YPD 37C	3008	Repeatibility	0.137267	0.0763614
YPD 37C	3008	A ○ A	2.52143e-05	0.0693939
YPD 37C	3008	A	0.03108	0.0163874
YPD 37C	3008	Q	0.103459	0.0629166
Zeocin	3008	Residual	0.13115	0.0065986
Zeocin	3008	Repeatibility	0.259616	0.0746357
Zeocin	3008	A ○ A	0.129537	0.0748616
Zeocin	3008	A	0.209325	0.0433256
Zeocin	3008	Q	0.270372	0.118699
6-azauracil	2999	Residual	0.255145	0.0118913
6-azauracil	2999	Repeatibility	0.27748	0.0651714
6-azauracil	2999	A ○ A	1.86688e-09	0.061633
6-azauracil	2999	A	0.0906765	0.0233548
6-azauracil	2999	Q	0.376699	0.135303
Cadmium Chloride	2999	Residual	0.157081	0.00732509
Cadmium Chloride	2999	Repeatibility	0.17138	0.0430977
Cadmium Chloride	2999	A ○ A	0.00174036	0.0405836
Cadmium Chloride	2999	A	0.127081	0.0240879
Cadmium Chloride	2999	Q	0.542717	0.181621
Caffeine	2999	Residual	0.093429	0.00435013
Caffeine	2999	Repeatibility	0.0516573	0.0272423
Caffeine	2999	A ○ A	0.0647864	0.0278592
Caffeine	2999	A	0.0652531	0.0137255
Caffeine	2999	Q	0.724874	0.197381
Cobalt Chloride	2999	Residual	0.0846318	0.00396052
Cobalt Chloride	2999	Repeatibility	0.164936	0.0495739
Cobalt Chloride	2999	A ○ A	0.110202	0.0504379
Cobalt Chloride	2999	A	0.05267	0.015012
Cobalt Chloride	2999	Q	0.58756	0.233768
Congo Red	2999	Residual	0.407735	0.0189885
Congo Red	2999	Repeatibility	0.249828	0.0759136
Congo Red	2999	A ○ A	0.0176016	0.0721143
Congo Red	2999	A	0.103428	0.0262609
Congo Red	2999	Q	0.221407	0.0925514
Copper Sulfate	2999	Residual	0.0198023	0.000915361
Copper Sulfate	2999	Repeatibility	0.082785	0.0188286
Copper Sulfate	2999	A ○ A	0.0302616	0.0188245
Copper Sulfate	2999	A	0.0161628	0.00490818
Copper Sulfate	2999	Q	0.850988	0.851477
Diamide	2999	Residual	0.410773	0.0191291
Diamide	2999	Repeatibility	0.237913	0.0724591
Diamide	2999	A ○ A	0.0115335	0.0685209
Diamide	2999	A	0.0773813	0.0225248
Diamide	2999	Q	0.262399	0.0957486
EGTA	2999	Residual	0.168697	0.00786351
EGTA	2999	Repeatibility	0.133414	0.0580065
EGTA	2999	A ○ A	0.144811	0.0594078
EGTA	2999	A	0.0857107	0.0214508
EGTA	2999	Q	0.467368	0.149651
EtOH	2999	Residual	0.243015	0.0114936
EtOH	2999	Repeatibility	0.323927	0.0905325
EtOH	2999	A ○ A	0.127206	0.0898076
EtOH	2999	A	0.100716	0.028202
EtOH	2999	Q	0.205136	0.0901937
EtOH Glu	2999	Residual	0.296484	0.0137738
EtOH Glu	2999	Repeatibility	0.159471	0.060519
EtOH Glu	2999	A ○ A	0.0745101	0.0593805
EtOH Glu	2999	A	0.0639009	0.0188476
EtOH Glu	2999	Q	0.405634	0.140199
Fluconazole	2999	Residual	0.194173	0.00907378
Fluconazole	2999	Repeatibility	0.14236	0.0543384
Fluconazole	2999	A ○ A	0.0854759	0.0541889
Fluconazole	2999	A	0.126202	0.0263403
Fluconazole	2999	Q	0.451789	0.146022
Formamide	2999	Residual	0.389688	0.0181461
Formamide	2999	Repeatibility	0.117124	0.0657184
Formamide	2999	A ○ A	0.111059	0.0650992
Formamide	2999	A	0.0451993	0.0163362
Formamide	2999	Q	0.33693	0.131394
Fructose	2999	Residual	0.279078	0.0129593
Fructose	2999	Repeatibility	0.159808	0.0639641
Fructose	2999	A ○ A	0.114122	0.0639166
Fructose	2999	A	0.0447236	0.016567
Fructose	2999	Q	0.402269	0.131959
Galactose	2999	Residual	0.0466556	0.00218673
Galactose	2999	Repeatibility	0.0341489	0.0221329
Galactose	2999	A ○ A	0.089103	0.0237396
Galactose	2999	A	0.0216094	0.00627186
Galactose	2999	Q	0.808483	0.405366
Glycerol	2999	Residual	0.235996	0.0146151
Glycerol	2999	Repeatibility	0.361038	0.0808751
Glycerol	2999	A ○ A	0.000156492	0.0762542
Glycerol	2999	A	0.0272726	0.0160184
Glycerol	2999	Q	0.375537	0.133523
Lactate	2999	Residual	0.365387	0.0177401
Lactate	2999	Repeatibility	0.187051	0.0729746
Lactate	2999	A ○ A	0.0593083	0.0706618
Lactate	2999	A	0.142061	0.0311664
Lactate	2999	Q	0.246193	0.0940701
Lithium Chloride	2999	Residual	0.0308338	0.00143603
Lithium Chloride	2999	Repeatibility	0.0544117	0.0323764
Lithium Chloride	2999	A ○ A	0.134109	0.0349023
Lithium Chloride	2999	A	0.0720877	0.0146711
Lithium Chloride	2999	Q	0.708558	0.320855
Magnesium Chloride	2999	Residual	0.363736	0.0169395
Magnesium Chloride	2999	Repeatibility	0.148658	0.0678879
Magnesium Chloride	2999	A ○ A	0.0912105	0.0668642
Magnesium Chloride	2999	A	0.0921126	0.0237358
Magnesium Chloride	2999	Q	0.304282	0.113359
Maltose	2999	Residual	0.0333596	0.00156211
Maltose	2999	Repeatibility	0.161137	0.0332022
Maltose	2999	A ○ A	0.0391266	0.03273
Maltose	2999	A	0.0233122	0.00809875
Maltose	2999	Q	0.743064	0.373065
Manganese Sulfate	2999	Residual	0.0629276	0.00290883
Manganese Sulfate	2999	Repeatibility	0.0604475	0.030035
Manganese Sulfate	2999	A ○ A	0.0948411	0.0314645
Manganese Sulfate	2999	A	0.055664	0.0128727
Manganese Sulfate	2999	Q	0.72612	0.204969
Mannose	2999	Residual	0.273918	0.012858
Mannose	2999	Repeatibility	0.169321	0.0630336
Mannose	2999	A ○ A	0.0848472	0.0622226
Mannose	2999	A	0.0873152	0.022194
Mannose	2999	Q	0.384599	0.145603
Methotrexate	2999	Residual	0.378703	0.0178793
Methotrexate	2999	Repeatibility	1.26067e-07	0.0591819
Methotrexate	2999	A ○ A	0.168889	0.0608484
Methotrexate	2999	A	0.106676	0.024834
Methotrexate	2999	Q	0.345732	0.106401
Neomycin	2999	Residual	0.0726974	0.00341575
Neomycin	2999	Repeatibility	0.0681254	0.0246445
Neomycin	2999	A ○ A	0.0523906	0.0249935
Neomycin	2999	A	0.0260755	0.00762592
Neomycin	2999	Q	0.780711	0.277943
Paraquat	2999	Residual	0.0394968	0.00183847
Paraquat	2999	Repeatibility	0.135035	0.0319193
Paraquat	2999	A ○ A	0.0403783	0.0315985
Paraquat	2999	A	0.0636783	0.0138411
Paraquat	2999	Q	0.721412	0.266382
Raffinose	2999	Residual	0.200686	0.00942531
Raffinose	2999	Repeatibility	0.297488	0.0775357
Raffinose	2999	A ○ A	0.100033	0.0766002
Raffinose	2999	A	0.063132	0.0213247
Raffinose	2999	Q	0.338661	0.121843
SDS	2999	Residual	0.301333	0.0140128
SDS	2999	Repeatibility	0.0804135	0.0595351
SDS	2999	A ○ A	0.137747	0.0604407
SDS	2999	A	0.0914417	0.0228062
SDS	2999	Q	0.389064	0.123448
Sorbitol	2999	Residual	0.142719	0.00669592
Sorbitol	2999	Repeatibility	0.247565	0.0588164
Sorbitol	2999	A ○ A	0.0454832	0.0570925
Sorbitol	2999	A	0.0847174	0.0217801
Sorbitol	2999	Q	0.479515	0.157486
Sucrose	2999	Residual	0.310898	0.0144071
Sucrose	2999	Repeatibility	0.128206	0.0627743
Sucrose	2999	A ○ A	0.115035	0.062813
Sucrose	2999	A	0.0637391	0.0192852
Sucrose	2999	Q	0.382122	0.126123
Trehalose	2999	Residual	0.273632	0.0129696
Trehalose	2999	Repeatibility	0.417364	0.0989389
Trehalose	2999	A ○ A	0.0743959	0.0962132
Trehalose	2999	A	0.103402	0.0287967
Trehalose	2999	Q	0.131207	0.0871764
Tunicamycin	2999	Residual	0.123182	0.0057354
Tunicamycin	2999	Repeatibility	0.10627	0.0341174
Tunicamycin	2999	A ○ A	0.0264898	0.0332216
Tunicamycin	2999	A	0.12194	0.0221646
Tunicamycin	2999	Q	0.622118	0.172126
Xylose	2999	Residual	0.274319	0.0130001
Xylose	2999	Repeatibility	0.331112	0.088081
Xylose	2999	A ○ A	0.0922565	0.0863392
Xylose	2999	A	0.083536	0.025059
Xylose	2999	Q	0.218777	0.103085
YNB	2999	Residual	0.62311	0.028912
YNB	2999	Repeatibility	0.173913	0.0839353
YNB	2999	A ○ A	0.0487859	0.0800791
YNB	2999	A	0.074703	0.0223472
YNB	2999	Q	0.0794879	0.0592609
YNB ph3	2999	Residual	0.703594	0.0326451
YNB ph3	2999	Repeatibility	0.220241	0.0895833
YNB ph3	2999	A ○ A	1.49729e-09	0.0835974
YNB ph3	2999	A	0.0761648	0.022892
YNB ph3	2999	Q	1.49729e-09	0.00109045
YNB ph8	2999	Residual	0.600552	0.0278757
YNB ph8	2999	Repeatibility	0.141813	0.0717249
YNB ph8	2999	A ○ A	0.00433078	0.0668273
YNB ph8	2999	A	0.0833635	0.0222422
YNB ph8	2999	Q	0.169941	0.0889746
YPD	2999	Residual	0.362912	0.0167756
YPD	2999	Repeatibility	0.139921	0.0691108
YPD	2999	A ○ A	0.120795	0.0689447
YPD	2999	A	0.0644537	0.0199557
YPD	2999	Q	0.311918	0.115291
YPD 15C	2999	Residual	0.296618	0.0137319
YPD 15C	2999	Repeatibility	0.235646	0.0678612
YPD 15C	2999	A ○ A	0.0500269	0.0655614
YPD 15C	2999	A	0.062135	0.0191189
YPD 15C	2999	Q	0.355574	0.149536
YPD 37C	2999	Residual	0.410261	0.0193771
YPD 37C	2999	Repeatibility	0.219219	0.0726473
YPD 37C	2999	A ○ A	0.0308604	0.0692764
YPD 37C	2999	A	0.0701093	0.0211248
YPD 37C	2999	Q	0.269551	0.110643
Zeocin	2999	Residual	0.161383	0.00750671
Zeocin	2999	Repeatibility	0.178767	0.0532382
Zeocin	2999	A ○ A	0.0841656	0.0531014
Zeocin	2999	A	0.0402906	0.0142892
Zeocin	2999	Q	0.535393	0.173658
6-azauracil	3000	Residual	0.205193	0.00973142
6-azauracil	3000	Repeatibility	0.30182	0.0673525
6-azauracil	3000	A ○ A	0.0422178	0.0647599
6-azauracil	3000	A	0.0995326	0.0254068
6-azauracil	3000	Q	0.351237	0.154788
Cadmium Chloride	3000	Residual	0.027527	0.00130709
Cadmium Chloride	3000	Repeatibility	0.197377	0.0293526
Cadmium Chloride	3000	A ○ A	0.000519264	0.0212576
Cadmium Chloride	3000	A	0.00583117	0.00481118
Cadmium Chloride	3000	Q	0.768746	0.769288
Caffeine	3000	Residual	0.0337326	0.00159996
Caffeine	3000	Repeatibility	0.282533	0.0467315
Caffeine	3000	A ○ A	0.0205385	0.0441237
Caffeine	3000	A	0.0441474	0.0136557
Caffeine	3000	Q	0.619049	0.393593
Cobalt Chloride	3000	Residual	0.0676317	0.00321322
Cobalt Chloride	3000	Repeatibility	0.283024	0.075052
Cobalt Chloride	3000	A ○ A	0.213691	0.077896
Cobalt Chloride	3000	A	0.0481597	0.0187861
Cobalt Chloride	3000	Q	0.387494	0.169607
Congo Red	3000	Residual	0.219147	0.0103936
Congo Red	3000	Repeatibility	0.489301	0.0862458
Congo Red	3000	A ○ A	6.69331e-11	0.080891
Congo Red	3000	A	0.0502167	0.0211658
Congo Red	3000	Q	0.241335	0.103668
Copper Sulfate	3000	Residual	0.0227263	0.00107432
Copper Sulfate	3000	Repeatibility	0.177177	0.0319849
Copper Sulfate	3000	A ○ A	0.0388809	0.031398
Copper Sulfate	3000	A	0.012649	0.00632761
Copper Sulfate	3000	Q	0.748567	0.749172
Diamide	3000	Residual	0.221935	0.0105138
Diamide	3000	Repeatibility	0.260182	0.0634882
Diamide	3000	A ○ A	0.0569145	0.0615146
Diamide	3000	A	0.0700679	0.0205747
Diamide	3000	Q	0.3909	0.171075
EGTA	3000	Residual	0.152744	0.00722437
EGTA	3000	Repeatibility	0.249178	0.0631524
EGTA	3000	A ○ A	0.108188	0.0631514
EGTA	3000	A	0.0564835	0.0184578
EGTA	3000	Q	0.433406	0.189092
EtOH	3000	Residual	0.285333	0.0136875
EtOH	3000	Repeatibility	0.372567	0.0762685
EtOH	3000	A ○ A	2.44582e-10	0.0714103
EtOH	3000	A	0.070997	0.0231298
EtOH	3000	Q	0.271103	0.116213
EtOH Glu	3000	Residual	0.200595	0.00952925
EtOH Glu	3000	Repeatibility	0.33555	0.0728548
EtOH Glu	3000	A ○ A	0.0603971	0.0704668
EtOH Glu	3000	A	0.0631827	0.0213615
EtOH Glu	3000	Q	0.340275	0.1342
Fluconazole	3000	Residual	0.114591	0.00544712
Fluconazole	3000	Repeatibility	0.347748	0.0690037
Fluconazole	3000	A ○ A	0.0558965	0.066984
Fluconazole	3000	A	0.0902387	0.0249664
Fluconazole	3000	Q	0.391526	0.148994
Formamide	3000	Residual	0.471966	0.0223891
Formamide	3000	Repeatibility	0.164677	0.073384
Formamide	3000	A ○ A	0.0965158	0.0716386
Formamide	3000	A	0.0653577	0.0210275
Formamide	3000	Q	0.201483	0.104846
Fructose	3000	Residual	0.16508	0.0078207
Fructose	3000	Repeatibility	0.244392	0.0644888
Fructose	3000	A ○ A	0.113315	0.06441
Fructose	3000	A	0.06033	0.0196881
Fructose	3000	Q	0.416882	0.157195
Galactose	3000	Residual	0.137785	0.00659375
Galactose	3000	Repeatibility	0.235979	0.0701252
Galactose	3000	A ○ A	0.181255	0.0721275
Galactose	3000	A	0.0587833	0.0200905
Galactose	3000	Q	0.386198	0.156325
Glycerol	3000	Residual	0.282146	0.0136986
Glycerol	3000	Repeatibility	0.248902	0.0657961
Glycerol	3000	A ○ A	0.0393366	0.0627469
Glycerol	3000	A	0.0924857	0.0248319
Glycerol	3000	Q	0.337129	0.129291
Lactate	3000	Residual	0.274022	0.0132555
Lactate	3000	Repeatibility	0.35345	0.0739312
Lactate	3000	A ○ A	3.26099e-05	0.0692438
Lactate	3000	A	0.0911357	0.02572
Lactate	3000	Q	0.28136	0.120737
Lithium Chloride	3000	Residual	0.0239552	0.00113749
Lithium Chloride	3000	Repeatibility	0.147108	0.0309455
Lithium Chloride	3000	A ○ A	0.0524772	0.0309372
Lithium Chloride	3000	A	0.0324917	0.00970438
Lithium Chloride	3000	Q	0.743968	0.373872
Magnesium Chloride	3000	Residual	0.1811	0.00859807
Magnesium Chloride	3000	Repeatibility	0.237428	0.05656
Magnesium Chloride	3000	A ○ A	0.0576817	0.0549903
Magnesium Chloride	3000	A	0.0444325	0.0162631
Magnesium Chloride	3000	Q	0.479358	0.164318
Maltose	3000	Residual	0.0897331	0.00440847
Maltose	3000	Repeatibility	0.348395	0.0553491
Maltose	3000	A ○ A	9.23875e-08	0.0518805
Maltose	3000	A	0.0123709	0.00970729
Maltose	3000	Q	0.549501	0.2769
Manganese Sulfate	3000	Residual	0.0512056	0.00242058
Manganese Sulfate	3000	Repeatibility	0.143361	0.0386898
Manganese Sulfate	3000	A ○ A	0.0954005	0.039733
Manganese Sulfate	3000	A	0.0405858	0.0132221
Manganese Sulfate	3000	Q	0.669447	0.201416
Mannose	3000	Residual	0.186693	0.00894309
Mannose	3000	Repeatibility	0.198885	0.0693051
Mannose	3000	A ○ A	0.193682	0.0716422
Mannose	3000	A	0.0443737	0.0175859
Mannose	3000	Q	0.376366	0.151941
Methotrexate	3000	Residual	0.320828	0.015278
Methotrexate	3000	Repeatibility	0.258578	0.0639798
Methotrexate	3000	A ○ A	1.2533e-07	0.0597577
Methotrexate	3000	A	0.101769	0.0255317
Methotrexate	3000	Q	0.318825	0.130703
Neomycin	3000	Residual	0.107207	0.00513655
Neomycin	3000	Repeatibility	0.392687	0.066266
Neomycin	3000	A ○ A	0.00964604	0.0616322
Neomycin	3000	A	0.0520631	0.0177951
Neomycin	3000	Q	0.438396	0.256094
Paraquat	3000	Residual	0.0367641	0.00173694
Paraquat	3000	Repeatibility	0.117416	0.0352913
Paraquat	3000	A ○ A	0.108459	0.0369218
Paraquat	3000	A	0.0413134	0.0117583
Paraquat	3000	Q	0.696047	0.299209
Raffinose	3000	Residual	0.133356	0.00647772
Raffinose	3000	Repeatibility	0.290743	0.0684834
Raffinose	3000	A ○ A	0.0878677	0.0674568
Raffinose	3000	A	0.13179	0.0304275
Raffinose	3000	Q	0.356243	0.146237
SDS	3000	Residual	0.130471	0.00616418
SDS	3000	Repeatibility	0.425228	0.0700112
SDS	3000	A ○ A	1.47734e-11	0.065706
SDS	3000	A	0.0381428	0.0160621
SDS	3000	Q	0.406158	0.237256
Sorbitol	3000	Residual	0.12648	0.00599882
Sorbitol	3000	Repeatibility	0.382209	0.0720354
Sorbitol	3000	A ○ A	0.0388438	0.0688287
Sorbitol	3000	A	0.0859601	0.024487
Sorbitol	3000	Q	0.366507	0.155098
Sucrose	3000	Residual	0.241286	0.0129558
Sucrose	3000	Repeatibility	0.347083	0.0853252
Sucrose	3000	A ○ A	0.0714601	0.0821637
Sucrose	3000	A	0.143578	0.0338778
Sucrose	3000	Q	0.196593	0.118031
Trehalose	3000	Residual	0.271623	0.0131032
Trehalose	3000	Repeatibility	0.280519	0.0745825
Trehalose	3000	A ○ A	0.0802474	0.0727057
Trehalose	3000	A	0.0905526	0.025297
Trehalose	3000	Q	0.277058	0.129091
Tunicamycin	3000	Residual	0.0645022	0.0030542
Tunicamycin	3000	Repeatibility	0.161074	0.0383865
Tunicamycin	3000	A ○ A	0.0630067	0.038389
Tunicamycin	3000	A	0.0567125	0.0147323
Tunicamycin	3000	Q	0.654705	0.250938
Xylose	3000	Residual	0.30714	0.0147637
Xylose	3000	Repeatibility	0.278983	0.0719501
Xylose	3000	A ○ A	0.0542375	0.0692852
Xylose	3000	A	0.0600078	0.0205748
Xylose	3000	Q	0.299631	0.127249
YNB	3000	Residual	0.0984794	0.00465781
YNB	3000	Repeatibility	0.22239	0.0394769
YNB	3000	A ○ A	0.00914371	0.0373455
YNB	3000	A	0.0129408	0.00743278
YNB	3000	Q	0.657046	0.465719
YNB ph3	3000	Residual	0.593317	0.0280593
YNB ph3	3000	Repeatibility	0.182404	0.0786641
YNB ph3	3000	A ○ A	0.0625586	0.0750214
YNB ph3	3000	A	0.0439029	0.0180515
YNB ph3	3000	Q	0.117818	0.0712196
YNB ph8	3000	Residual	0.330116	0.015621
YNB ph8	3000	Repeatibility	0.216664	0.0660094
YNB ph8	3000	A ○ A	0.0838564	0.0646865
YNB ph8	3000	A	0.020628	0.0127834
YNB ph8	3000	Q	0.348736	0.151863
YPD	3000	Residual	0.263739	0.0124605
YPD	3000	Repeatibility	0.230746	0.0695429
YPD	3000	A ○ A	0.106232	0.0687348
YPD	3000	A	0.07885	0.0231467
YPD	3000	Q	0.320433	0.126626
YPD 15C	3000	Residual	0.252337	0.0119282
YPD 15C	3000	Repeatibility	0.42023	0.0770123
YPD 15C	3000	A ○ A	9.74039e-07	0.0722845
YPD 15C	3000	A	0.0207908	0.015034
YPD 15C	3000	Q	0.306642	0.124375
YPD 37C	3000	Residual	0.122617	0.00591182
YPD 37C	3000	Repeatibility	0.372791	0.0711171
YPD 37C	3000	A ○ A	0.0581255	0.0684618
YPD 37C	3000	A	0.0409665	0.0173658
YPD 37C	3000	Q	0.4055	0.169842
Zeocin	3000	Residual	0.0641243	0.00303295
Zeocin	3000	Repeatibility	0.159208	0.0447179
Zeocin	3000	A ○ A	0.119968	0.0461949
Zeocin	3000	A	0.0463634	0.0133819
Zeocin	3000	Q	0.610337	0.864061
6-azauracil	3001	Residual	0.380862	0.0212199
6-azauracil	3001	Repeatibility	0.24177	0.108557
6-azauracil	3001	A ○ A	0.0314583	0.105018
6-azauracil	3001	A	0.0862215	0.0283426
6-azauracil	3001	Q	0.259688	0.121919
Cadmium Chloride	3001	Residual	0.620075	0.0356109
Cadmium Chloride	3001	Repeatibility	0.00886099	0.118328
Cadmium Chloride	3001	A ○ A	0.219502	0.121537
Cadmium Chloride	3001	A	0.0425953	0.0223657
Cadmium Chloride	3001	Q	0.108966	0.091879
Caffeine	3001	Residual	0.0492482	0.0027923
Caffeine	3001	Repeatibility	0.0873729	0.0581087
Caffeine	3001	A ○ A	0.186187	0.0620512
Caffeine	3001	A	0.0160714	0.0109726
Caffeine	3001	Q	0.661121	0.332918
Cobalt Chloride	3001	Residual	0.125528	0.00725116
Cobalt Chloride	3001	Repeatibility	0.0491254	0.0601422
Cobalt Chloride	3001	A ○ A	0.162678	0.0628713
Cobalt Chloride	3001	A	0.0548439	0.017246
Cobalt Chloride	3001	Q	0.607825	0.275321
Congo Red	3001	Residual	0.241593	0.0134218
Congo Red	3001	Repeatibility	0.363929	0.132524
Congo Red	3001	A ○ A	0.0916964	0.130416
Congo Red	3001	A	0.100249	0.0333632
Congo Red	3001	Q	0.202532	0.114064
Copper Sulfate	3001	Residual	0.276885	0.0163386
Copper Sulfate	3001	Repeatibility	0.206431	0.104669
Copper Sulfate	3001	A ○ A	0.0720185	0.103114
Copper Sulfate	3001	A	0.148544	0.0362041
Copper Sulfate	3001	Q	0.296122	0.154073
Diamide	3001	Residual	0.323706	0.0179967
Diamide	3001	Repeatibility	0.19844	0.103573
Diamide	3001	A ○ A	0.0995975	0.102607
Diamide	3001	A	0.058302	0.0231257
Diamide	3001	Q	0.319955	0.17521
EGTA	3001	Residual	0.102503	0.00569899
EGTA	3001	Repeatibility	1.1121e-06	0.0545296
EGTA	3001	A ○ A	0.338292	0.0622724
EGTA	3001	A	0.0562952	0.0204119
EGTA	3001	Q	0.502909	0.229371
EtOH	3001	Residual	0.295131	0.0164083
EtOH	3001	Repeatibility	0.386519	0.122962
EtOH	3001	A ○ A	3.14219e-10	0.118543
EtOH	3001	A	0.0809999	0.0295153
EtOH	3001	Q	0.23735	0.117715
EtOH Glu	3001	Residual	0.258616	0.0143998
EtOH Glu	3001	Repeatibility	0.287148	0.118457
EtOH Glu	3001	A ○ A	0.125151	0.117666
EtOH Glu	3001	A	0.0362336	0.0218844
EtOH Glu	3001	Q	0.292851	0.142793
Fluconazole	3001	Residual	0.135628	0.00880968
Fluconazole	3001	Repeatibility	0.158631	0.0982551
Fluconazole	3001	A ○ A	0.161694	0.100122
Fluconazole	3001	A	0.168251	0.0387399
Fluconazole	3001	Q	0.375797	0.17528
Formamide	3001	Residual	0.521721	0.0292025
Formamide	3001	Repeatibility	0.0952307	0.100057
Formamide	3001	A ○ A	0.0660208	0.0969121
Formamide	3001	A	0.0870284	0.0269739
Formamide	3001	Q	0.23	0.120052
Fructose	3001	Residual	0.218046	0.0121227
Fructose	3001	Repeatibility	0.245058	0.10337
Fructose	3001	A ○ A	0.104825	0.102752
Fructose	3001	A	0.0611758	0.0237134
Fructose	3001	Q	0.370895	0.189991
Galactose	3001	Residual	0.188359	0.0104802
Galactose	3001	Repeatibility	0.362611	0.106495
Galactose	3001	A ○ A	0.0157759	0.102595
Galactose	3001	A	0.0478988	0.0222734
Galactose	3001	Q	0.385355	0.177243
Glycerol	3001	Residual	0.248516	0.0138064
Glycerol	3001	Repeatibility	0.291202	0.111228
Glycerol	3001	A ○ A	0.0718855	0.108963
Glycerol	3001	A	0.0668642	0.0260779
Glycerol	3001	Q	0.321532	0.13732
Lactate	3001	Residual	0.323333	0.0180156
Lactate	3001	Repeatibility	0.31208	0.110468
Lactate	3001	A ○ A	0.0141947	0.102674
Lactate	3001	A	0.0489438	0.0230631
Lactate	3001	Q	0.301449	0.133866
Lithium Chloride	3001	Residual	0.0381944	0.00213843
Lithium Chloride	3001	Repeatibility	0.149188	0.0685228
Lithium Chloride	3001	A ○ A	0.133022	0.0702387
Lithium Chloride	3001	A	0.0808528	0.0220058
Lithium Chloride	3001	Q	0.598743	0.286388
Magnesium Chloride	3001	Residual	0.224157	0.0124718
Magnesium Chloride	3001	Repeatibility	0.283976	0.104805
Magnesium Chloride	3001	A ○ A	0.0716858	0.103225
Magnesium Chloride	3001	A	0.0488493	0.0220885
Magnesium Chloride	3001	Q	0.371332	0.179615
Maltose	3001	Residual	0.402452	0.0224918
Maltose	3001	Repeatibility	0.517437	0.162079
Maltose	3001	A ○ A	1.98971e-09	0.156125
Maltose	3001	A	0.0801115	0.0331473
Maltose	3001	Q	1.58622e-10	0.00223137
Manganese Sulfate	3001	Residual	0.0896915	0.00498286
Manganese Sulfate	3001	Repeatibility	0.0754062	0.0517611
Manganese Sulfate	3001	A ○ A	0.114775	0.0530686
Manganese Sulfate	3001	A	0.0349201	0.0141012
Manganese Sulfate	3001	Q	0.685207	0.19449
Mannose	3001	Residual	0.187952	0.0104893
Mannose	3001	Repeatibility	0.223584	0.106174
Mannose	3001	A ○ A	0.143928	0.106563
Mannose	3001	A	0.102082	0.0299848
Mannose	3001	Q	0.342453	0.202416
Methotrexate	3001	Residual	0.282774	0.0167665
Methotrexate	3001	Repeatibility	0.0439206	0.0770035
Methotrexate	3001	A ○ A	0.127705	0.078072
Methotrexate	3001	A	0.119482	0.0289962
Methotrexate	3001	Q	0.426117	0.173241
Neomycin	3001	Residual	0.0613991	0.00342423
Neomycin	3001	Repeatibility	0.14972	0.0774123
Neomycin	3001	A ○ A	0.180126	0.0793621
Neomycin	3001	A	0.0508628	0.0186066
Neomycin	3001	Q	0.557892	0.35576
Paraquat	3001	Residual	0.0698458	0.00388923
Paraquat	3001	Repeatibility	0.0972243	0.0568262
Paraquat	3001	A ○ A	0.119938	0.0585502
Paraquat	3001	A	0.0665009	0.0184875
[truncated: 1,021 more rows]
