# Supplementary material for: Rare variants contribute disproportionately to quantitative trait variation in yeast
Source: eLife. 2019 Oct 24;8:e49212. doi: 10.7554/eLife.49212 (PMC6892613; doi:10.7554/eLife.49212)
Supplement: Figure 3—source data 2. — Results for the joint variance component models are given. This includes results for a model with two allele frequency bins (Figure 3A, figure supplement 1A), seven allele frequency bins (Figure 3—figure supplement 1B), and seven allele frequency bins using only variants that are private to each of the 16 parents (Figure 3—figure supplement 1C). [file elife-49212-fig3-data2.xls]

## Sheet: 2 components
Component	Trait	Fraction of phenotypic variance	Standard Error
Residual Error	6-azauracil	0.435983	0.0065695
MAF >= 1%	6-azauracil	0.265063	0.0208709
MAF <1%	6-azauracil	0.298954	0.0220554
Residual Error	Cadmium Chloride	0.0891292	0.00186185
MAF >= 1%	Cadmium Chloride	0.203825	0.0137314
MAF <1%	Cadmium Chloride	0.707046	0.0233552
Residual Error	Caffeine	0.22649	0.00385719
MAF >= 1%	Caffeine	0.732557	0.028986
MAF <1%	Caffeine	0.0409531	0.0139234
Residual Error	Cobalt Chloride	0.269159	0.00446082
MAF >= 1%	Cobalt Chloride	0.361485	0.0226694
MAF <1%	Cobalt Chloride	0.369356	0.0231302
Residual Error	Congo Red	0.38034	0.00584337
MAF >= 1%	Congo Red	0.16388	0.0164595
MAF <1%	Congo Red	0.455781	0.0245265
Residual Error	Copper Sulfate	0.122631	0.00238819
MAF >= 1%	Copper Sulfate	0.877369	0.0275996
MAF <1%	Copper Sulfate	1.01841e-11	0.0108074
Residual Error	Diamide	0.377686	0.00584313
MAF >= 1%	Diamide	0.262152	0.0204726
MAF <1%	Diamide	0.360162	0.0232831
Residual Error	EGTA	0.336997	0.00529554
MAF >= 1%	EGTA	0.634461	0.0285626
MAF <1%	EGTA	0.0285426	0.0137189
Residual Error	EtOH Glu	0.361278	0.00562795
MAF >= 1%	EtOH Glu	0.234148	0.0193086
MAF <1%	EtOH Glu	0.404574	0.0239647
Residual Error	EtOH Glucose	0.347209	0.00543723
MAF >= 1%	EtOH Glucose	0.202015	0.0179165
MAF <1%	EtOH Glucose	0.450776	0.0245582
Residual Error	Fluconazole	0.350465	0.00551426
MAF >= 1%	Fluconazole	0.369544	0.0237317
MAF <1%	Fluconazole	0.279991	0.0217884
Residual Error	Formamide	0.53615	0.00776996
MAF >= 1%	Formamide	0.328364	0.0228729
MAF <1%	Formamide	0.135486	0.0174471
Residual Error	Fructose	0.297488	0.00478782
MAF >= 1%	Fructose	0.190779	0.0170065
MAF <1%	Fructose	0.511734	0.0251707
Residual Error	Galactose	0.190824	0.00335136
MAF >= 1%	Galactose	0.202971	0.0160962
MAF <1%	Galactose	0.606205	0.0251903
Residual Error	Glycerol	0.449622	0.00674138
MAF >= 1%	Glycerol	0.306678	0.0223058
MAF <1%	Glycerol	0.2437	0.0208618
Residual Error	Lactate	0.38955	0.00600353
MAF >= 1%	Lactate	0.414893	0.0251468
MAF <1%	Lactate	0.195557	0.0198039
Residual Error	Lithium Chloride	0.177101	0.00316279
MAF >= 1%	Lithium Chloride	0.822899	0.028598
MAF <1%	Lithium Chloride	1.7073e-08	0.0114999
Residual Error	Magnesium Chloride	0.3058	0.00490006
MAF >= 1%	Magnesium Chloride	0.199007	0.017434
MAF <1%	Magnesium Chloride	0.495193	0.0250246
Residual Error	Maltose	0.161978	0.00300232
MAF >= 1%	Maltose	0.671546	0.0272443
MAF <1%	Maltose	0.166475	0.0174127
Residual Error	Manganese Sulfate	0.235776	0.00400732
MAF >= 1%	Manganese Sulfate	0.644943	0.0282674
MAF <1%	Manganese Sulfate	0.119281	0.0169476
Residual Error	Mannose	0.328398	0.00518489
MAF >= 1%	Mannose	0.177635	0.0167175
MAF <1%	Mannose	0.493967	0.0250254
Residual Error	Methotrexate	0.382245	0.00591307
MAF >= 1%	Methotrexate	0.409861	0.0250094
MAF <1%	Methotrexate	0.207894	0.0201067
Residual Error	Neomycin	0.258911	0.00433273
MAF >= 1%	Neomycin	0.480995	0.025612
MAF <1%	Neomycin	0.260094	0.0209291
Residual Error	Paraquat	0.14849	0.00277138
MAF >= 1%	Paraquat	0.829019	0.0282615
MAF <1%	Paraquat	0.022491	0.012263
Residual Error	Raffinose	0.250336	0.00416471
MAF >= 1%	Raffinose	0.199164	0.0168307
MAF <1%	Raffinose	0.550501	0.0253246
Residual Error	SDS	0.308386	0.00497578
MAF >= 1%	SDS	0.374768	0.0235052
MAF <1%	SDS	0.316845	0.022418
Residual Error	Sorbitol	0.446758	0.00670734
MAF >= 1%	Sorbitol	0.349119	0.0235647
MAF <1%	Sorbitol	0.204123	0.0199206
Residual Error	Sucrose	0.308175	0.0049262
MAF >= 1%	Sucrose	0.187585	0.0169764
MAF <1%	Sucrose	0.50424	0.0251168
Residual Error	Trehalose	0.521701	0.00756591
MAF >= 1%	Trehalose	0.126986	0.0151486
MAF <1%	Trehalose	0.351313	0.0221884
Residual Error	Tunicamycin	0.146265	0.00272249
MAF >= 1%	Tunicamycin	0.214235	0.0156547
MAF <1%	Tunicamycin	0.6395	0.0246317
Residual Error	Xylose	0.597293	0.00847311
MAF >= 1%	Xylose	0.173822	0.0173827
MAF <1%	Xylose	0.228885	0.0193315
Residual Error	YNB	0.181121	0.00313699
MAF >= 1%	YNB	0.0689143	0.00962863
MAF <1%	YNB	0.749964	0.0256173
Residual Error	YNB ph3	0.699827	0.00958316
MAF >= 1%	YNB ph3	0.0584566	0.0108574
MAF <1%	YNB ph3	0.241716	0.017785
Residual Error	YNB ph8	0.654448	0.00912433
MAF >= 1%	YNB ph8	0.223268	0.0190472
MAF <1%	YNB ph8	0.122284	0.0158587
Residual Error	YPD	0.325537	0.00514352
MAF >= 1%	YPD	0.167945	0.0162576
MAF <1%	YPD	0.506518	0.0251419
Residual Error	YPD 15C	0.510126	0.00746405
MAF >= 1%	YPD 15C	0.34028	0.0232869
MAF <1%	YPD 15C	0.149594	0.0180678
Residual Error	YPD 37C	0.290024	0.00463835
MAF >= 1%	YPD 37C	0.0972087	0.012404
MAF <1%	YPD 37C	0.612767	0.0258113
Residual Error	Zeocin	0.28192	0.00463494
MAF >= 1%	Zeocin	0.430032	0.024703
MAF <1%	Zeocin	0.288047	0.0216738

## Sheet: 7 components
Allele Frequency Bin	Trait	Fraction of phenotypic variance	Standard Error
[0.29860,0.50000]	6-azauracil	0.066858	0.0166557
[0.11139,0.29860)	6-azauracil	0.0883654	0.0232458
[0.04253,0.11139)	6-azauracil	0.0862673	0.0232063
[0.02275,0.04253)	6-azauracil	9.56447e-11	0.0177673
[0.01088,0.02275)	6-azauracil	0.0526901	0.0192759
[0.00495,0.01088)	6-azauracil	0.220251	0.0238467
[0.00000,0.00495)	6-azauracil	0.0318394	0.0149281
[0.29860,0.50000]	Cadmium Chloride	2.39069e-07	0.0101588
[0.11139,0.29860)	Cadmium Chloride	0.0666173	0.0163192
[0.04253,0.11139)	Cadmium Chloride	0.391692	0.0239391
[0.02275,0.04253)	Cadmium Chloride	2.20293e-11	0.0151254
[0.01088,0.02275)	Cadmium Chloride	2.20293e-11	0.0143907
[0.00495,0.01088)	Cadmium Chloride	0.374039	0.0231716
[0.00000,0.00495)	Cadmium Chloride	0.0481871	0.0132203
[0.29860,0.50000]	Caffeine	0.24829	0.0251305
[0.11139,0.29860)	Caffeine	0.269689	0.0265549
[0.04253,0.11139)	Caffeine	0.130268	0.0213757
[0.02275,0.04253)	Caffeine	3.12077e-07	0.0149784
[0.01088,0.02275)	Caffeine	6.87442e-09	0.0150527
[0.00495,0.01088)	Caffeine	5.80283e-08	0.0134243
[0.00000,0.00495)	Caffeine	0.127836	0.0156756
[0.29860,0.50000]	Cobalt Chloride	0.1324	0.0187143
[0.11139,0.29860)	Cobalt Chloride	0.0485861	0.0214745
[0.04253,0.11139)	Cobalt Chloride	0.207892	0.0251074
[0.02275,0.04253)	Cobalt Chloride	0.000629035	0.00367393
[0.01088,0.02275)	Cobalt Chloride	0.00320206	0.0131764
[0.00495,0.01088)	Cobalt Chloride	0.0822423	0.0190008
[0.00000,0.00495)	Cobalt Chloride	0.25772	0.0220989
[0.29860,0.50000]	Congo Red	0.0665305	0.0146916
[0.11139,0.29860)	Congo Red	0.0139363	0.0188748
[0.04253,0.11139)	Congo Red	0.139796	0.0240548
[0.02275,0.04253)	Congo Red	7.55774e-11	0.0172003
[0.01088,0.02275)	Congo Red	7.55774e-11	0.0162231
[0.00495,0.01088)	Congo Red	0.309042	0.0257206
[0.00000,0.00495)	Congo Red	0.0619101	0.0166262
[0.29860,0.50000]	Copper Sulfate	0.325202	0.0243457
[0.11139,0.29860)	Copper Sulfate	0.144441	0.0218901
[0.04253,0.11139)	Copper Sulfate	0.271582	0.0217441
[0.02275,0.04253)	Copper Sulfate	0.131667	0.0173468
[0.01088,0.02275)	Copper Sulfate	1.68171e-07	0.013447
[0.00495,0.01088)	Copper Sulfate	1.03447e-11	0.0106918
[0.00000,0.00495)	Copper Sulfate	4.77586e-06	0.00888197
[0.29860,0.50000]	Diamide	0.106032	0.0182133
[0.11139,0.29860)	Diamide	0.037684	0.0216854
[0.04253,0.11139)	Diamide	0.174395	0.0255068
[0.02275,0.04253)	Diamide	6.28011e-11	0.0176328
[0.01088,0.02275)	Diamide	6.28011e-11	0.0171076
[0.00495,0.01088)	Diamide	0.242559	0.0238759
[0.00000,0.00495)	Diamide	0.0449389	0.0156433
[0.29860,0.50000]	EGTA	0.140917
[0.11139,0.29860)	EGTA	0.273845
[0.04253,0.11139)	EGTA	0.109108
[0.02275,0.04253)	EGTA	0.00400091
[0.01088,0.02275)	EGTA	0.0845461
[0.00495,0.01088)	EGTA	0.0428324
[0.00000,0.00495)	EGTA	3.01479e-24
[0.29860,0.50000]	EtOH Glu	0.114498	0.0183567
[0.11139,0.29860)	EtOH Glu	0.0398855	0.0206252
[0.04253,0.11139)	EtOH Glu	0.12841	0.0242337
[0.02275,0.04253)	EtOH Glu	2.58595e-07	0.0172422
[0.01088,0.02275)	EtOH Glu	0.00969925	0.0143073
[0.00495,0.01088)	EtOH Glu	0.274212	0.0247132
[0.00000,0.00495)	EtOH Glu	0.0516461	0.015665
[0.29860,0.50000]	EtOH Glucose	0.0827314	0.0161646
[0.11139,0.29860)	EtOH Glucose	0.0624674	0.0209237
[0.04253,0.11139)	EtOH Glucose	0.0711461	0.0213891
[0.02275,0.04253)	EtOH Glucose	1.0767e-09	0.0165786
[0.01088,0.02275)	EtOH Glucose	0.029128	0.0172038
[0.00495,0.01088)	EtOH Glucose	0.371662	0.0261463
[0.00000,0.00495)	EtOH Glucose	8.63592e-11	0.0137605
[0.29860,0.50000]	Fluconazole	0.0486199	0.0159931
[0.11139,0.29860)	Fluconazole	0.149528	0.0246844
[0.04253,0.11139)	Fluconazole	0.0354913	0.0208073
[0.02275,0.04253)	Fluconazole	3.55898e-11	0.018125
[0.01088,0.02275)	Fluconazole	0.228323	0.0248973
[0.00495,0.01088)	Fluconazole	3.55898e-11	0.0178341
[0.00000,0.00495)	Fluconazole	0.162982	0.0202164
[0.29860,0.50000]	Formamide	0.147406	0.0212885
[0.11139,0.29860)	Formamide	0.0659026	0.0231964
[0.04253,0.11139)	Formamide	0.122567	0.0234886
[0.02275,0.04253)	Formamide	2.31716e-06	0.0165455
[0.01088,0.02275)	Formamide	7.90762e-05	0.0166235
[0.00495,0.01088)	Formamide	0.0685507	0.0175118
[0.00000,0.00495)	Formamide	0.0675032	0.0150459
[0.29860,0.50000]	Fructose	0.0838446	1.29857e-24
[0.11139,0.29860)	Fructose	0.0697198	2.40752e-24
[0.04253,0.11139)	Fructose	0.0886058	2.77946e-24
[0.02275,0.04253)	Fructose	4.80524e-08	3.34194e-24
[0.01088,0.02275)	Fructose	4.57074e-15	2.44426e-13
[0.00495,0.01088)	Fructose	0.395702	1.26468e-24
[0.00000,0.00495)	Fructose	0.0344273	1.89582e-24
[0.29860,0.50000]	Galactose	0.0899812	0.0143611
[0.11139,0.29860)	Galactose	5.6583e-07	0.0174351
[0.04253,0.11139)	Galactose	0.210468	0.0226004
[0.02275,0.04253)	Galactose	2.99286e-08	0.0163678
[0.01088,0.02275)	Galactose	3.19044e-11	0.0149372
[0.00495,0.01088)	Galactose	0.277086	0.0237035
[0.00000,0.00495)	Galactose	0.213217	0.0210425
[0.29860,0.50000]	Glycerol	0.149643	0.0208343
[0.11139,0.29860)	Glycerol	0.0483807	0.0227877
[0.04253,0.11139)	Glycerol	0.0982224	0.0225313
[0.02275,0.04253)	Glycerol	1.78733e-10	0.0173926
[0.01088,0.02275)	Glycerol	0.048589	0.0176808
[0.00495,0.01088)	Glycerol	0.192902	0.0222741
[0.00000,0.00495)	Glycerol	0.00676313	0.00908077
[0.29860,0.50000]	Lactate	0.199515	0.0235632
[0.11139,0.29860)	Lactate	0.106603	0.0251505
[0.04253,0.11139)	Lactate	0.125705	0.0241781
[0.02275,0.04253)	Lactate	6.68205e-05	0.0165854
[0.01088,0.02275)	Lactate	0.0148536	0.0155895
[0.00495,0.01088)	Lactate	0.158476	0.0202219
[0.00000,0.00495)	Lactate	0.00452612	0.00922011
[0.29860,0.50000]	Lithium Chloride	0.142556	0.0186033
[0.11139,0.29860)	Lithium Chloride	0.0135778	0.0171724
[0.04253,0.11139)	Lithium Chloride	0.219275	0.0246738
[0.02275,0.04253)	Lithium Chloride	0.055479	0.0189329
[0.01088,0.02275)	Lithium Chloride	0.369667	0.0260584
[0.00495,0.01088)	Lithium Chloride	5.72498e-06	0.015299
[0.00000,0.00495)	Lithium Chloride	1.60095e-05	0.0113893
[0.29860,0.50000]	Magnesium Chloride	0.108424	0.0177491
[0.11139,0.29860)	Magnesium Chloride	0.069882	0.0204548
[0.04253,0.11139)	Magnesium Chloride	0.0791005	0.0201515
[0.02275,0.04253)	Magnesium Chloride	8.93383e-10	0.0161655
[0.01088,0.02275)	Magnesium Chloride	1.07346e-10	0.015615
[0.00495,0.01088)	Magnesium Chloride	0.380947	0.0263356
[0.00000,0.00495)	Magnesium Chloride	0.0315868	0.0141194
[0.29860,0.50000]	Maltose	0.0508015	0.0145518
[0.11139,0.29860)	Maltose	0.172037	0.0252818
[0.04253,0.11139)	Maltose	0.381434	0.028161
[0.02275,0.04253)	Maltose	1.53942e-07	0.0173733
[0.01088,0.02275)	Maltose	0.099113	0.0197443
[0.00495,0.01088)	Maltose	0.0849483	0.0180749
[0.00000,0.00495)	Maltose	0.0305643	0.0119389
[0.29860,0.50000]	Manganese Sulfate	0.254038	0.0246666
[0.11139,0.29860)	Manganese Sulfate	0.0995753	0.0238319
[0.04253,0.11139)	Manganese Sulfate	0.167994	0.023289
[0.02275,0.04253)	Manganese Sulfate	3.61367e-06	0.0167771
[0.01088,0.02275)	Manganese Sulfate	0.091429	0.0184922
[0.00495,0.01088)	Manganese Sulfate	0.118211	0.0192659
[0.00000,0.00495)	Manganese Sulfate	0.0303704	0.0130095
[0.29860,0.50000]	Mannose	0.0759059	0.0158542
[0.11139,0.29860)	Mannose	0.0841341	0.0209073
[0.04253,0.11139)	Mannose	0.0568328	0.019664
[0.02275,0.04253)	Mannose	1.54763e-07	0.0159209
[0.01088,0.02275)	Mannose	7.74259e-06	0.0154375
[0.00495,0.01088)	Mannose	0.393824	0.0268271
[0.00000,0.00495)	Mannose	0.0340422	0.0144981
[0.29860,0.50000]	Methotrexate	0.0919066	0.0177201
[0.11139,0.29860)	Methotrexate	0.073061	0.0234544
[0.04253,0.11139)	Methotrexate	0.141685	0.0258049
[0.02275,0.04253)	Methotrexate	0.0106741	0.0162586
[0.01088,0.02275)	Methotrexate	0.0524169	0.0195561
[0.00495,0.01088)	Methotrexate	0.0848824	0.0204452
[0.00000,0.00495)	Methotrexate	0.155286	0.0206729
[0.29860,0.50000]	Neomycin	0.143876	0.0203973
[0.11139,0.29860)	Neomycin	0.0897054	0.0235966
[0.04253,0.11139)	Neomycin	0.280337	0.0267462
[0.02275,0.04253)	Neomycin	2.57316e-10	0.0173268
[0.01088,0.02275)	Neomycin	4.59662e-11	0.0165705
[0.00495,0.01088)	Neomycin	0.0148863	0.0138887
[0.00000,0.00495)	Neomycin	0.206993	0.0200016
[0.29860,0.50000]	Paraquat	0.27738	0.0241184
[0.11139,0.29860)	Paraquat	0.129991	0.0226447
[0.04253,0.11139)	Paraquat	0.151686	0.0213386
[0.02275,0.04253)	Paraquat	0.0447145	0.0167463
[0.01088,0.02275)	Paraquat	0.112708	0.0182997
[0.00495,0.01088)	Paraquat	5.66111e-10	0.014116
[0.00000,0.00495)	Paraquat	0.133432	0.015087
[0.29860,0.50000]	Raffinose	0.0554912	0.0138187
[0.11139,0.29860)	Raffinose	0.0685769	0.0195278
[0.04253,0.11139)	Raffinose	0.0938889	0.0212141
[0.02275,0.04253)	Raffinose	5.94416e-05	0.0161996
[0.01088,0.02275)	Raffinose	0.0131375	0.0157784
[0.00495,0.01088)	Raffinose	0.372026	0.0266535
[0.00000,0.00495)	Raffinose	0.1291	0.0188281
[0.29860,0.50000]	SDS	0.299851	0.0248656
[0.11139,0.29860)	SDS	0.0686983	0.0217014
[0.04253,0.11139)	SDS	0.0749275	0.0180102
[0.02275,0.04253)	SDS	2.45574e-09	0.0141642
[0.01088,0.02275)	SDS	2.27113e-05	0.0133109
[0.00495,0.01088)	SDS	2.89487e-06	0.0132013
[0.00000,0.00495)	SDS	0.290585	0.020285
[0.29860,0.50000]	Sorbitol	0.110435	0.0206193
[0.11139,0.29860)	Sorbitol	0.155557	0.0256378
[0.04253,0.11139)	Sorbitol	0.0891606	0.0221384
[0.02275,0.04253)	Sorbitol	1.89396e-06	0.0169668
[0.01088,0.02275)	Sorbitol	1.92956e-10	0.0172867
[0.00495,0.01088)	Sorbitol	0.0874151	0.0195853
[0.00000,0.00495)	Sorbitol	0.11506	0.0182055
[0.29860,0.50000]	Sucrose	0.025567	0.0119591
[0.11139,0.29860)	Sucrose	0.0636532	0.0198245
[0.04253,0.11139)	Sucrose	0.0766981	0.0219075
[0.02275,0.04253)	Sucrose	7.15835e-11	0.0170565
[0.01088,0.02275)	Sucrose	0.0671919	0.0191275
[0.00495,0.01088)	Sucrose	0.393681	0.0275011
[0.00000,0.00495)	Sucrose	0.0238897	0.0146894
[0.29860,0.50000]	Trehalose	0.0970791	0.0156767
[0.11139,0.29860)	Trehalose	6.74414e-06	0.0178482
[0.04253,0.11139)	Trehalose	0.071743	0.0206167
[0.02275,0.04253)	Trehalose	2.18987e-10	0.0154547
[0.01088,0.02275)	Trehalose	1.3901e-08	0.014701
[0.00495,0.01088)	Trehalose	0.283728	0.0234297
[0.00000,0.00495)	Trehalose	8.0645e-08	0.0125324
[0.29860,0.50000]	Tunicamycin	0.0907155	0.0123057
[0.11139,0.29860)	Tunicamycin	0.00504835	0.0144688
[0.04253,0.11139)	Tunicamycin	0.0322207	0.0145039
[0.02275,0.04253)	Tunicamycin	0.00294655	0.00547875
[0.01088,0.02275)	Tunicamycin	0.0786777	0.013717
[0.00495,0.01088)	Tunicamycin	0.107068	0.0167446
[0.00000,0.00495)	Tunicamycin	0.542517	0.0250449
[0.29860,0.50000]	Xylose	0.0960993	0.0162994
[0.11139,0.29860)	Xylose	0.00403228	0.0128814
[0.04253,0.11139)	Xylose	0.091255	0.0220967
[0.02275,0.04253)	Xylose	2.75591e-10	0.0156895
[0.01088,0.02275)	Xylose	0.00982368	0.0159989
[0.00495,0.01088)	Xylose	0.186605	0.0206735
[0.00000,0.00495)	Xylose	8.10286e-09	0.0118607
[0.29860,0.50000]	YNB	0.0273601	0.00745103
[0.11139,0.29860)	YNB	0.0042158	0.0103925
[0.04253,0.11139)	YNB	0.00875872	0.0118636
[0.02275,0.04253)	YNB	0.00358868	0.00540179
[0.01088,0.02275)	YNB	8.10656e-08	0.00817014
[0.00495,0.01088)	YNB	0.217787	0.0182596
[0.00000,0.00495)	YNB	0.57534	0.0258357
[0.29860,0.50000]	YNB ph3	0.0343209	9.18144e-12
[0.11139,0.29860)	YNB ph3	0.0540252	1.39499e-11
[0.04253,0.11139)	YNB ph3	9.86973e-09	4.30636e-07
[0.02275,0.04253)	YNB ph3	1.1016e-05	3.51388e-11
[0.01088,0.02275)	YNB ph3	7.17447e-07	1.735e-11
[0.00495,0.01088)	YNB ph3	1.27854e-09	1.12641e-11
[0.00000,0.00495)	YNB ph3	0.223181	5.37841e-12
[0.29860,0.50000]	YNB ph8	0.067935	0.0168538
[0.11139,0.29860)	YNB ph8	0.120275	0.0225186
[0.04253,0.11139)	YNB ph8	0.0426191	0.0191684
[0.02275,0.04253)	YNB ph8	1.16901e-08	0.0145675
[0.01088,0.02275)	YNB ph8	7.90105e-06	0.0152052
[0.00495,0.01088)	YNB ph8	9.80903e-10	0.0135956
[0.00000,0.00495)	YNB ph8	0.124968	0.0163974
[0.29860,0.50000]	YPD	0.0561353	0.0142843
[0.11139,0.29860)	YPD	0.0602246	0.020457
[0.04253,0.11139)	YPD	0.0970298	0.022226
[0.02275,0.04253)	YPD	1.3056e-10	0.0163569
[0.01088,0.02275)	YPD	7.46535e-05	0.0156726
[0.00495,0.01088)	YPD	0.400988	0.0270328
[0.00000,0.00495)	YPD	0.0231622	0.0139964
[0.29860,0.50000]	YPD 15C	0.0854837	0.0184553
[0.11139,0.29860)	YPD 15C	0.111653	0.0250556
[0.04253,0.11139)	YPD 15C	0.150605	0.0255589
[0.02275,0.04253)	YPD 15C	1.81721e-10	0.0170266
[0.01088,0.02275)	YPD 15C	1.30856e-06	0.0173825
[0.00495,0.01088)	YPD 15C	0.127195	0.0196003
[0.00000,0.00495)	YPD 15C	0.00158077	0.00425659
[0.29860,0.50000]	YPD 37C	0.0632932	0.0115056
[0.11139,0.29860)	YPD 37C	0.000888208	0.00396018
[0.04253,0.11139)	YPD 37C	2.944e-05	0.0143892
[0.02275,0.04253)	YPD 37C	4.14781e-11	0.0133111
[0.01088,0.02275)	YPD 37C	0.0294668	0.012242
[0.00495,0.01088)	YPD 37C	0.230111	0.0219248
[0.00000,0.00495)	YPD 37C	0.397737	0.0252662
[0.29860,0.50000]	Zeocin	0.195048	0.0216751
[0.11139,0.29860)	Zeocin	0.0766488	0.0221041
[0.04253,0.11139)	Zeocin	0.0791617	0.0211812
[0.02275,0.04253)	Zeocin	0.0289503	0.0165459
[0.01088,0.02275)	Zeocin	0.0379947	0.0170935
[0.00495,0.01088)	Zeocin	0.0333259	0.015901
[0.00000,0.00495)	Zeocin	0.276574	0.0219193

## Sheet: 7 components private-only
Allele Frequency Bin	Trait	Fraction of phenotypic variance	Standard Error
[0.29860,0.50000]	6-azauracil	0.0186227	0.00554428
[0.11139,0.29860)	6-azauracil	0.0871626	0.0135021
[0.04253,0.11139)	6-azauracil	0.171006	0.0214844
[0.02275,0.04253)	6-azauracil	9.48859e-11	0.0148045
[0.01088,0.02275)	6-azauracil	0.0601373	0.0165497
[0.00495,0.01088)	6-azauracil	0.179418	0.0221396
[0.00000,0.00495)	6-azauracil	0.0361387	0.0140339
[0.29860,0.50000]	Cadmium Chloride	2.3787e-07	0.00084008
[0.11139,0.29860)	Cadmium Chloride	0.0524721	0.00930657
[0.04253,0.11139)	Cadmium Chloride	0.452488	0.0224633
[0.02275,0.04253)	Cadmium Chloride	2.36094e-11	0.0118233
[0.01088,0.02275)	Cadmium Chloride	2.36094e-11	0.00924427
[0.00495,0.01088)	Cadmium Chloride	0.24622	0.01865
[0.00000,0.00495)	Cadmium Chloride	0.120269	0.0152894
[0.29860,0.50000]	Caffeine	6.99979e-06	0.00130407
[0.11139,0.29860)	Caffeine	0.253829	0.0175697
[0.04253,0.11139)	Caffeine	0.257776	0.0215353
[0.02275,0.04253)	Caffeine	3.77293e-07	0.0130484
[0.01088,0.02275)	Caffeine	8.31097e-09	0.0114753
[0.00495,0.01088)	Caffeine	7.01546e-08	0.0123927
[0.00000,0.00495)	Caffeine	0.206683	0.0189773
[0.29860,0.50000]	Cobalt Chloride	2.96467e-11	0.00107461
[0.11139,0.29860)	Cobalt Chloride	2.96467e-11	0.00775889
[0.04253,0.11139)	Cobalt Chloride	0.296215	0.0217296
[0.02275,0.04253)	Cobalt Chloride	2.96467e-11	0.0136902
[0.01088,0.02275)	Cobalt Chloride	8.01936e-06	0.0101967
[0.00495,0.01088)	Cobalt Chloride	0.164215	0.0194311
[0.00000,0.00495)	Cobalt Chloride	0.267197	0.0226525
[0.29860,0.50000]	Congo Red	0.01089	0.00398221
[0.11139,0.29860)	Congo Red	0.00308199	0.00735029
[0.04253,0.11139)	Congo Red	0.259897	0.0223273
[0.02275,0.04253)	Congo Red	7.28542e-11	0.0144032
[0.01088,0.02275)	Congo Red	7.28542e-11	0.011324
[0.00495,0.01088)	Congo Red	0.241296	0.0230181
[0.00000,0.00495)	Congo Red	0.0890709	0.017708
[0.29860,0.50000]	Copper Sulfate	1.30819e-06	0.000656071
[0.11139,0.29860)	Copper Sulfate	0.0144236	0.00499802
[0.04253,0.11139)	Copper Sulfate	0.0816086	0.0119088
[0.02275,0.04253)	Copper Sulfate	0.796525	0.0263457
[0.01088,0.02275)	Copper Sulfate	1.04551e-07	0.00836156
[0.00495,0.01088)	Copper Sulfate	6.6537e-12	0.00694088
[0.00000,0.00495)	Copper Sulfate	2.96932e-06	0.0057108
[0.29860,0.50000]	Diamide	0.0176108	0.00520444
[0.11139,0.29860)	Diamide	0.0745641	0.0130403
[0.04253,0.11139)	Diamide	0.271549	0.0234413
[0.02275,0.04253)	Diamide	6.22354e-11	0.0144773
[0.01088,0.02275)	Diamide	6.22354e-11	0.012474
[0.00495,0.01088)	Diamide	0.182842	0.0208778
[0.00000,0.00495)	Diamide	0.0609891	0.0162369
[0.29860,0.50000]	EGTA	0.00892107	0.00423082
[0.11139,0.29860)	EGTA	0.164581	0.016173
[0.04253,0.11139)	EGTA	0.384576	0.0257866
[0.02275,0.04253)	EGTA	1.31554e-05	0.0143248
[0.01088,0.02275)	EGTA	0.057268	0.0156716
[0.00495,0.01088)	EGTA	0.0222753	0.0124278
[0.00000,0.00495)	EGTA	1.71955e-11	0.00916764
[0.29860,0.50000]	EtOH Glu	0.026048	0.00635426
[0.11139,0.29860)	EtOH Glu	0.0618381	0.0123438
[0.04253,0.11139)	EtOH Glu	0.163194	0.0209853
[0.02275,0.04253)	EtOH Glu	9.90181e-08	0.0148682
[0.01088,0.02275)	EtOH Glu	0.0720727	0.016604
[0.00495,0.01088)	EtOH Glu	0.225461	0.0234975
[0.00000,0.00495)	EtOH Glu	0.0655976	0.0159948
[0.29860,0.50000]	EtOH Glucose	0.0171772	0.00498992
[0.11139,0.29860)	EtOH Glucose	0.0434947	0.0110108
[0.04253,0.11139)	EtOH Glucose	0.158762	0.0202006
[0.02275,0.04253)	EtOH Glucose	1.0535e-09	0.014512
[0.01088,0.02275)	EtOH Glucose	0.070508	0.0162737
[0.00495,0.01088)	EtOH Glucose	0.326278	0.0254291
[0.00000,0.00495)	EtOH Glucose	8.58954e-11	0.0124226
[0.29860,0.50000]	Fluconazole	0.00135247	0.00236586
[0.11139,0.29860)	Fluconazole	0.0749122	0.0126431
[0.04253,0.11139)	Fluconazole	0.113822	0.0195812
[0.02275,0.04253)	Fluconazole	3.63691e-11	0.0156438
[0.01088,0.02275)	Fluconazole	0.257133	0.0237365
[0.00495,0.01088)	Fluconazole	3.63691e-11	0.0165467
[0.00000,0.00495)	Fluconazole	0.157334	0.0195222
[0.29860,0.50000]	Formamide	0.0329161	0.00704038
[0.11139,0.29860)	Formamide	0.0591103	0.0123168
[0.04253,0.11139)	Formamide	0.230452	0.0226192
[0.02275,0.04253)	Formamide	2.39366e-06	0.0136657
[0.01088,0.02275)	Formamide	8.16583e-05	0.0122846
[0.00495,0.01088)	Formamide	0.0281276	0.0133338
[0.00000,0.00495)	Formamide	0.10354	0.0165057
[0.29860,0.50000]	Fructose	0.0137422	0.00443086
[0.11139,0.29860)	Fructose	0.0628783	0.0116626
[0.04253,0.11139)	Fructose	0.181409	0.0200991
[0.02275,0.04253)	Fructose	4.76613e-08	0.0136872
[0.01088,0.02275)	Fructose	8.93013e-11	0.0110082
[0.00495,0.01088)	Fructose	0.34314	0.0252828
[0.00000,0.00495)	Fructose	0.0681313	0.0171393
[0.29860,0.50000]	Galactose	1.20893e-24
[0.11139,0.29860)	Galactose	5.76799e-07
[0.04253,0.11139)	Galactose	0.339341
[0.02275,0.04253)	Galactose	3.10939e-08
[0.01088,0.02275)	Galactose	3.3841e-11
[0.00495,0.01088)	Galactose	0.192106
[0.00000,0.00495)	Galactose	0.240501
[0.29860,0.50000]	Glycerol	0.0559934	0.00928172
[0.11139,0.29860)	Glycerol	0.0605782	0.0126326
[0.04253,0.11139)	Glycerol	0.122636	0.019634
[0.02275,0.04253)	Glycerol	1.80847e-10	0.0145805
[0.01088,0.02275)	Glycerol	0.108181	0.0186535
[0.00495,0.01088)	Glycerol	0.158441	0.0211061
[0.00000,0.00495)	Glycerol	0.0344071	0.0131168
[0.29860,0.50000]	Lactate	0.0345522	0.00748021
[0.11139,0.29860)	Lactate	0.101082	0.0142621
[0.04253,0.11139)	Lactate	0.147227	0.0212563
[0.02275,0.04253)	Lactate	3.70237e-05	0.0150529
[0.01088,0.02275)	Lactate	0.128417	0.0189693
[0.00495,0.01088)	Lactate	0.143912	0.0208109
[0.00000,0.00495)	Lactate	0.02316	0.0129938
[0.29860,0.50000]	Lithium Chloride	0.0168148	0.00467822
[0.11139,0.29860)	Lithium Chloride	0.063744	0.0102316
[0.04253,0.11139)	Lithium Chloride	0.237859	0.0198313
[0.02275,0.04253)	Lithium Chloride	0.00697344	0.0133782
[0.01088,0.02275)	Lithium Chloride	0.498687	0.0257689
[0.00495,0.01088)	Lithium Chloride	4.886e-06	0.0132446
[0.00000,0.00495)	Lithium Chloride	1.36628e-05	0.00932222
[0.29860,0.50000]	Magnesium Chloride	0.0297444	0.0063198
[0.11139,0.29860)	Magnesium Chloride	0.0590264	0.0112651
[0.04253,0.11139)	Magnesium Chloride	0.165663	0.0193349
[0.02275,0.04253)	Magnesium Chloride	9.04564e-10	0.013519
[0.01088,0.02275)	Magnesium Chloride	1.09534e-10	0.0109434
[0.00495,0.01088)	Magnesium Chloride	0.346307	0.0259404
[0.00000,0.00495)	Magnesium Chloride	0.059318	0.0154586
[0.29860,0.50000]	Maltose	0.29207	0.026718
[0.11139,0.29860)	Maltose	0.176252	0.0137201
[0.04253,0.11139)	Maltose	0.252412	0.0175504
[0.02275,0.04253)	Maltose	1.43634e-07	0.00992385
[0.01088,0.02275)	Maltose	0.0209594	0.00983192
[0.00495,0.01088)	Maltose	0.0514058	0.0103405
[0.00000,0.00495)	Maltose	0.00867228	0.006587
[0.29860,0.50000]	Manganese Sulfate	0.0114169	0.00427255
[0.11139,0.29860)	Manganese Sulfate	0.11597	0.0138776
[0.04253,0.11139)	Manganese Sulfate	0.149734	0.0196232
[0.02275,0.04253)	Manganese Sulfate	3.94296e-06	0.0148717
[0.01088,0.02275)	Manganese Sulfate	0.243089	0.0224384
[0.00495,0.01088)	Manganese Sulfate	0.169786	0.0217495
[0.00000,0.00495)	Manganese Sulfate	0.0526741	0.0152813
[0.29860,0.50000]	Mannose	0.0166891	0.00494055
[0.11139,0.29860)	Mannose	0.0694081	0.0118809
[0.04253,0.11139)	Mannose	0.142872	0.019092
[0.02275,0.04253)	Mannose	1.5335e-07	0.0134996
[0.01088,0.02275)	Mannose	7.67237e-06	0.0109061
[0.00495,0.01088)	Mannose	0.348916	0.0256831
[0.00000,0.00495)	Mannose	0.0635715	0.0167683
[0.29860,0.50000]	Methotrexate	0.00213491	0.00184855
[0.11139,0.29860)	Methotrexate	0.100415	0.01371
[0.04253,0.11139)	Methotrexate	0.121553	0.0197627
[0.02275,0.04253)	Methotrexate	0.0159895	0.0165412
[0.01088,0.02275)	Methotrexate	0.0810071	0.0173586
[0.00495,0.01088)	Methotrexate	0.0929973	0.0198936
[0.00000,0.00495)	Methotrexate	0.192282	0.0215545
[0.29860,0.50000]	Neomycin	0.00281489	0.00251199
[0.11139,0.29860)	Neomycin	0.0525011	0.0107166
[0.04253,0.11139)	Neomycin	0.252292	0.0210355
[0.02275,0.04253)	Neomycin	2.03462e-10	0.0134819
[0.01088,0.02275)	Neomycin	4.31673e-11	0.0105479
[0.00495,0.01088)	Neomycin	0.163306	0.0198601
[0.00000,0.00495)	Neomycin	0.278613	0.0227143
[0.29860,0.50000]	Paraquat	0.000931257	0.00114904
[0.11139,0.29860)	Paraquat	0.124898	0.0128082
[0.04253,0.11139)	Paraquat	0.266128	0.020569
[0.02275,0.04253)	Paraquat	3.6455e-05	0.0137991
[0.01088,0.02275)	Paraquat	0.205231	0.0189917
[0.00495,0.01088)	Paraquat	6.02619e-10	0.013886
[0.00000,0.00495)	Paraquat	0.244111	0.0194106
[0.29860,0.50000]	Raffinose	0.0149323	0.00470404
[0.11139,0.29860)	Raffinose	0.0425493	0.00989601
[0.04253,0.11139)	Raffinose	0.128371	0.0184724
[0.02275,0.04253)	Raffinose	4.49307e-05	0.0137812
[0.01088,0.02275)	Raffinose	0.0597016	0.0134442
[0.00495,0.01088)	Raffinose	0.33642	0.0261415
[0.00000,0.00495)	Raffinose	0.150733	0.019215
[0.29860,0.50000]	SDS	0.0212532	0.00541527
[0.11139,0.29860)	SDS	0.106976	0.0119643
[0.04253,0.11139)	SDS	0.0847248	0.0159534
[0.02275,0.04253)	SDS	2.91556e-09	0.0118229
[0.01088,0.02275)	SDS	2.69644e-05	0.00961259
[0.00495,0.01088)	SDS	3.43692e-06	0.0120981
[0.00000,0.00495)	SDS	0.471346	0.025895
[0.29860,0.50000]	Sorbitol	0.0112104	0.00484731
[0.11139,0.29860)	Sorbitol	0.165027	0.0158965
[0.04253,0.11139)	Sorbitol	0.183569	0.0212612
[0.02275,0.04253)	Sorbitol	1.88487e-06	0.0135867
[0.01088,0.02275)	Sorbitol	1.92329e-10	0.0122788
[0.00495,0.01088)	Sorbitol	0.016964	0.0134226
[0.00000,0.00495)	Sorbitol	0.181057	0.0198716
[0.29860,0.50000]	Sucrose	0.0174599	0.00497244
[0.11139,0.29860)	Sucrose	0.0302904	0.0104871
[0.04253,0.11139)	Sucrose	0.133629	0.0193796
[0.02275,0.04253)	Sucrose	6.96091e-11	0.0147076
[0.01088,0.02275)	Sucrose	0.113526	0.0182889
[0.00495,0.01088)	Sucrose	0.315182	0.025037
[0.00000,0.00495)	Sucrose	0.0473487	0.0163516
[0.29860,0.50000]	Trehalose	0.0170007	0.00481218
[0.11139,0.29860)	Trehalose	6.78936e-06	0.00823894
[0.04253,0.11139)	Trehalose	0.151691	0.0190755
[0.02275,0.04253)	Trehalose	2.20502e-10	0.0132765
[0.01088,0.02275)	Trehalose	1.39937e-08	0.0106048
[0.00495,0.01088)	Trehalose	0.280293	0.0231754
[0.00000,0.00495)	Trehalose	8.11831e-08	0.0114967
[0.29860,0.50000]	Tunicamycin	0.00251961	0.00157654
[0.11139,0.29860)	Tunicamycin	0.031657	0.00762913
[0.04253,0.11139)	Tunicamycin	0.131339	0.0144903
[0.02275,0.04253)	Tunicamycin	3.71281e-05	0.0110201
[0.01088,0.02275)	Tunicamycin	0.0431402	0.0104617
[0.00495,0.01088)	Tunicamycin	0.115896	0.0161328
[0.00000,0.00495)	Tunicamycin	0.540106	0.0251906
[0.29860,0.50000]	Xylose	0.00773672	0.00395189
[0.11139,0.29860)	Xylose	0.041956	0.0105987
[0.04253,0.11139)	Xylose	0.114841	0.0191434
[0.02275,0.04253)	Xylose	2.76272e-10	0.0136879
[0.01088,0.02275)	Xylose	0.0494588	0.0150773
[0.00495,0.01088)	Xylose	0.172766	0.0205325
[0.00000,0.00495)	Xylose	6.74506e-09	0.0111416
[0.29860,0.50000]	YNB	8.99325e-11	0.000870091
[0.11139,0.29860)	YNB	1.13364e-05	0.0066436
[0.04253,0.11139)	YNB	0.256722	0.0181864
[0.02275,0.04253)	YNB	8.99325e-11	0.0121685
[0.01088,0.02275)	YNB	8.99325e-11	0.00864251
[0.00495,0.01088)	YNB	0.218985	0.0201914
[0.00000,0.00495)	YNB	0.344214	0.0232956
[0.29860,0.50000]	YNB ph3	0.00290046	0.00280226
[0.11139,0.29860)	YNB ph3	0.0910876	0.0111287
[0.04253,0.11139)	YNB ph3	7.15602e-08	0.0108463
[0.02275,0.04253)	YNB ph3	1.08613e-05	0.0100467
[0.01088,0.02275)	YNB ph3	2.12259e-05	0.00948686
[0.00495,0.01088)	YNB ph3	2.42988e-06	0.0115242
[0.00000,0.00495)	YNB ph3	0.215329	0.0189862
[0.29860,0.50000]	YNB ph8	0.029369	0.00695642
[0.11139,0.29860)	YNB ph8	0.107917	0.0132714
[0.04253,0.11139)	YNB ph8	0.0565784	0.0147386
[0.02275,0.04253)	YNB ph8	9.79911e-10	0.0113872
[0.01088,0.02275)	YNB ph8	6.54415e-05	0.0108119
[0.00495,0.01088)	YNB ph8	2.64665e-07	0.0120535
[0.00000,0.00495)	YNB ph8	0.163679	0.0180144
[0.29860,0.50000]	YPD	9.07213e-11	0.000762904
[0.11139,0.29860)	YPD	9.07213e-11	0.00472858
[0.04253,0.11139)	YPD	9.07213e-11	0.00963725
[0.02275,0.04253)	YPD	9.07213e-11	0.00988979
[0.01088,0.02275)	YPD	9.07213e-11	0.00607322
[0.00495,0.01088)	YPD	0.591078	0.0276919
[0.00000,0.00495)	YPD	9.07213e-11	0.0112632
[0.29860,0.50000]	YPD 15C	0.0331877	0.00770607
[0.11139,0.29860)	YPD 15C	0.177566	0.0165196
[0.04253,0.11139)	YPD 15C	0.109014	0.018285
[0.02275,0.04253)	YPD 15C	7.73442e-05	0.0125842
[0.01088,0.02275)	YPD 15C	0.00062284	0.00451689
[0.00495,0.01088)	YPD 15C	0.108012	0.0177322
[0.00000,0.00495)	YPD 15C	0.0399224	0.0131611
[0.29860,0.50000]	YPD 37C	0.000282066	0.000546898
[0.11139,0.29860)	YPD 37C	0.029488	0.00806006
[0.04253,0.11139)	YPD 37C	0.0392807	0.0131261
[0.02275,0.04253)	YPD 37C	3.83902e-05	0.0119859
[0.01088,0.02275)	YPD 37C	0.0236353	0.0103571
[0.00495,0.01088)	YPD 37C	0.223893	0.02193
[0.00000,0.00495)	YPD 37C	0.401155	0.0260439
[0.29860,0.50000]	Zeocin	0.017529	0.00513476
[0.11139,0.29860)	Zeocin	0.0960526	0.0127933
[0.04253,0.11139)	Zeocin	0.106025	0.0182312
[0.02275,0.04253)	Zeocin	0.0123479	0.0114763
[0.01088,0.02275)	Zeocin	0.106933	0.0171785
[0.00495,0.01088)	Zeocin	0.0443734	0.0167758
[0.00000,0.00495)	Zeocin	0.332443	0.024267
