# Supplementary material for: Rare variants contribute disproportionately to quantitative trait variation in yeast
Source: eLife journal article supplement (doi:10.7554/elife.49212), 2019-10-24

**Simulated architecture 1**

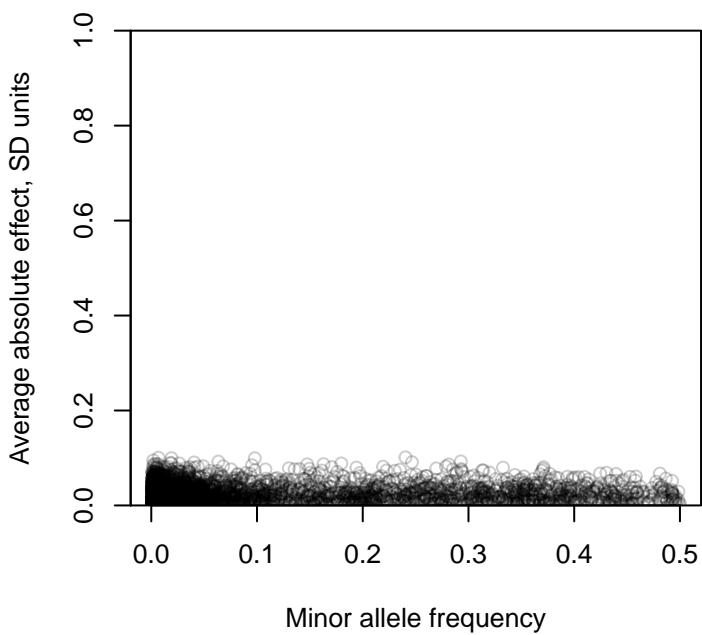

**Detected architecture for simulation 1**

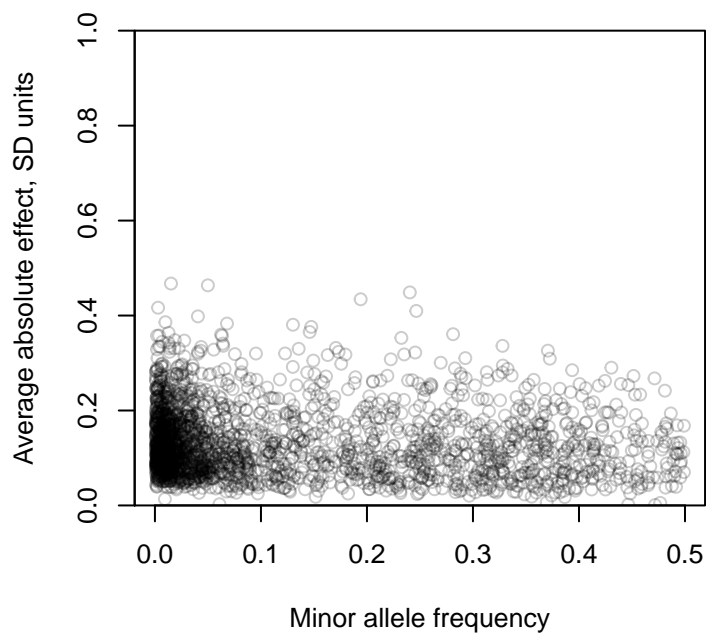

**Simulated architecture 2**

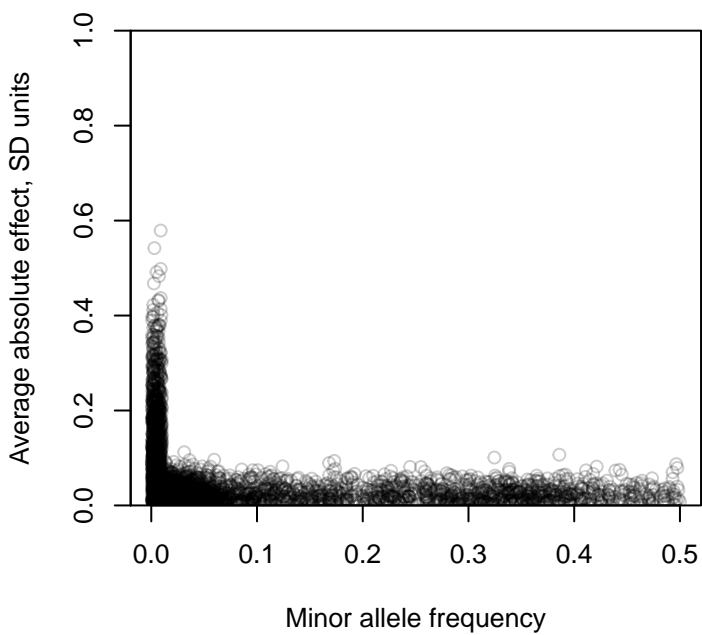

**Detected architecture for simulation 2**

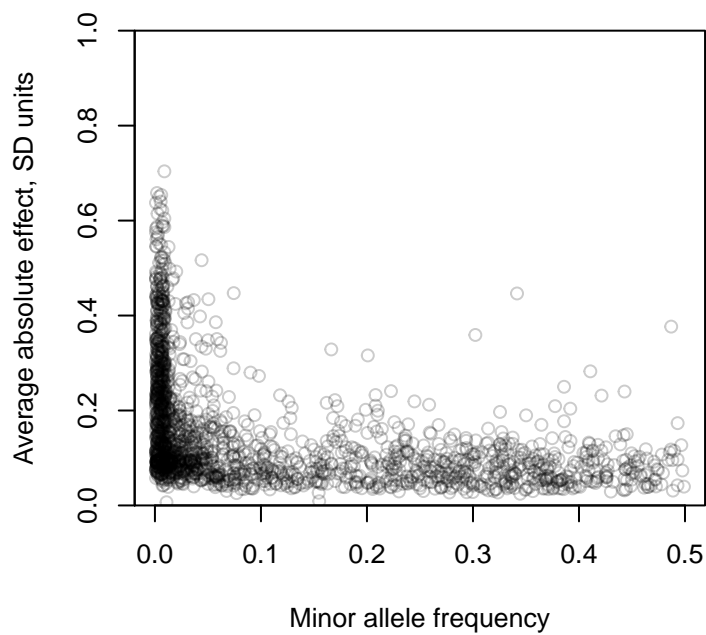

Supplement: supp [file elife_poa_e49212_Figure_3_figure_supplement_2.pdf › elife_poa_e49212_Figure_3_figure_supplement_2.pdf]
