# Supplementary material for: Rare variants contribute disproportionately to quantitative trait variation in yeast
Source: eLife journal article supplement (doi:10.7554/elife.49212), 2019-10-24

Fraction of phenotypic variance

M22 x BYa

BYa x RMx

RMx x YPS163a

YPS163a x YJM145x

Component

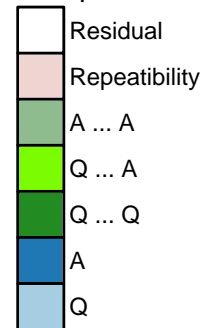

6-azauracil  
Cadmium Chloride  
Cobalt Chloride  
Congo Red  
Copper  
D-glucose  
EGTA  
EtOH  
Fluconazole  
Fluoride  
Galactose  
Glycerol  
Lithium Chloride  
Magnesium Chloride  
Manganese Chloride  
Mannitol  
Mannose  
Methanol  
Methylamine  
Nitrogen  
Rafinose  
Rafinose  
Sorbitol  
Sucrose  
Trehalose  
Tunicamycin  
Xylose  
YNB  
YNB  
YPD  
YPD  
Zinc

Trait

6-azauracil  
Cadmium Chloride  
Cobalt Chloride  
Congo Red  
Copper  
D-glucose  
EGTA  
EtOH  
Fluconazole  
Fluoride  
Galactose  
Glycerol  
Lithium Chloride  
Magnesium Chloride  
Manganese Chloride  
Mannitol  
Mannose  
Methanol  
Methylamine  
Nitrogen  
Rafinose  
Rafinose  
Sorbitol  
Sucrose  
Trehalose  
Tunicamycin  
Xylose  
YNB  
YNB  
YPD  
YPD  
Zinc

Fraction of phenotypic variance

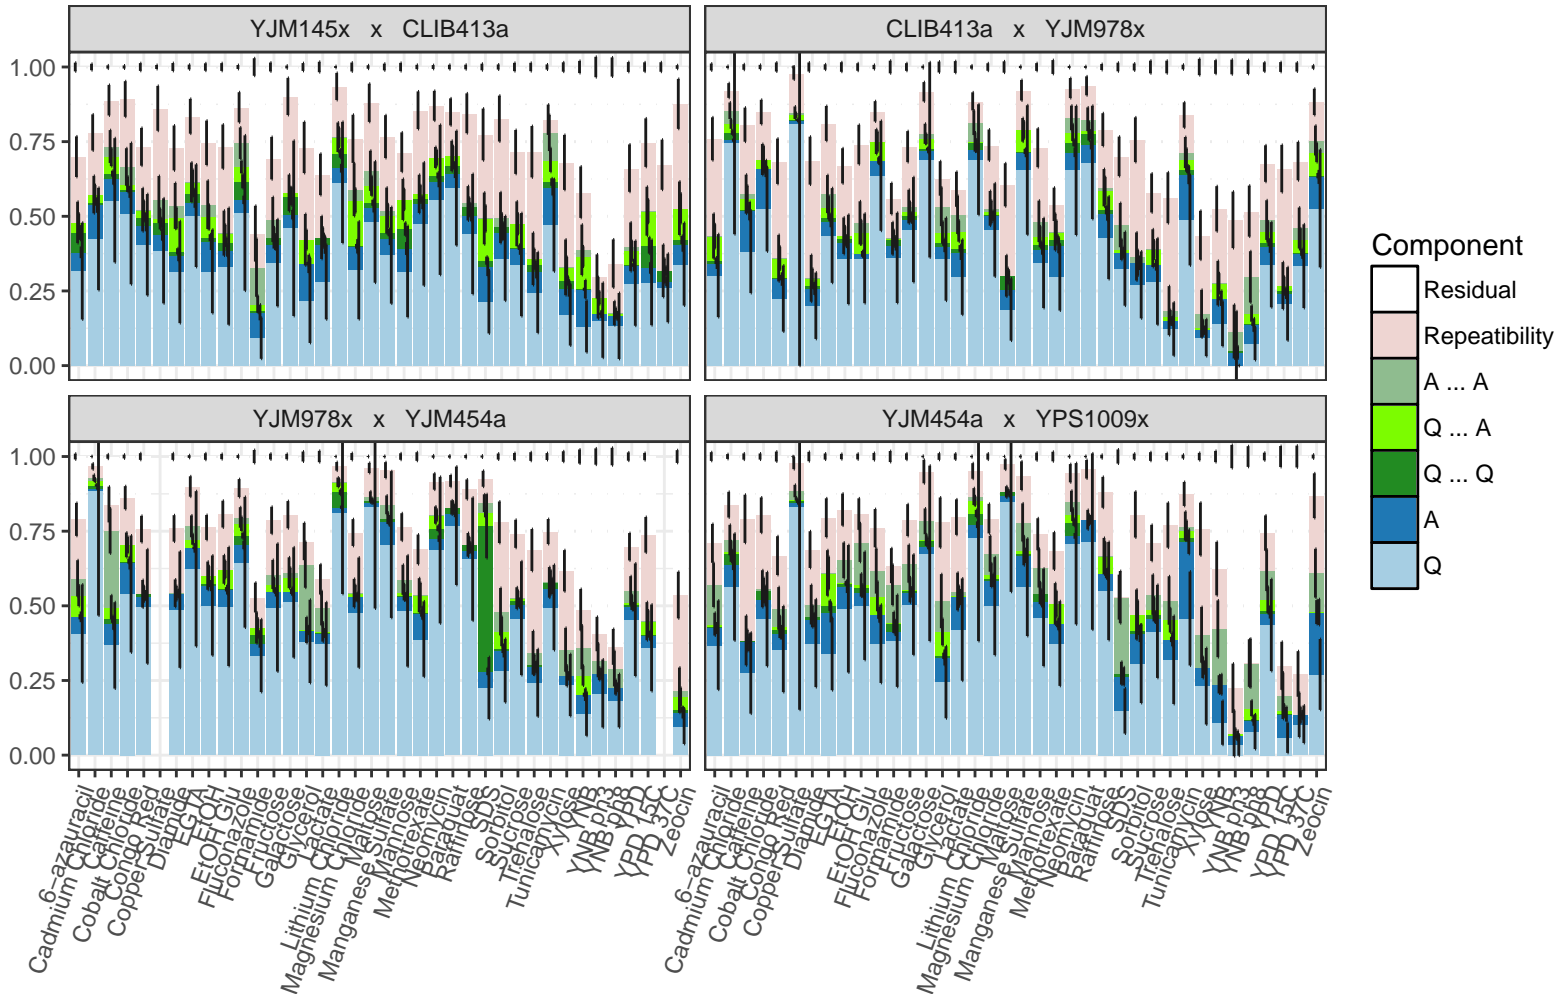

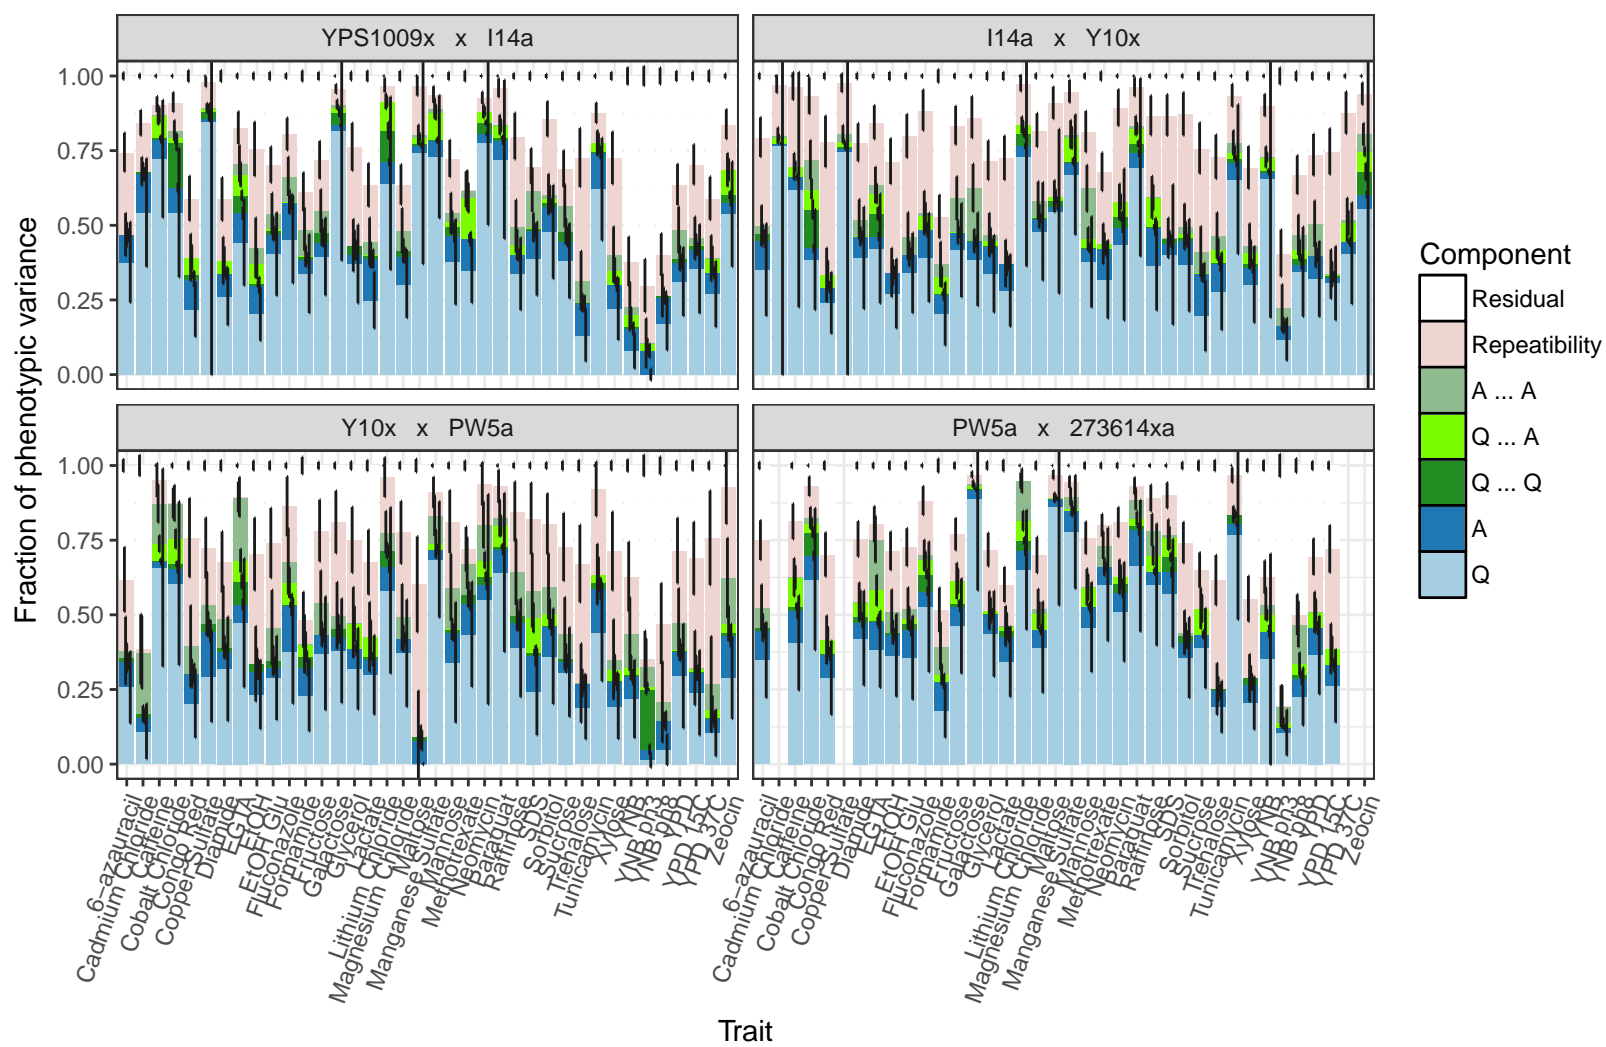

Trait

Fraction of phenotypic variance

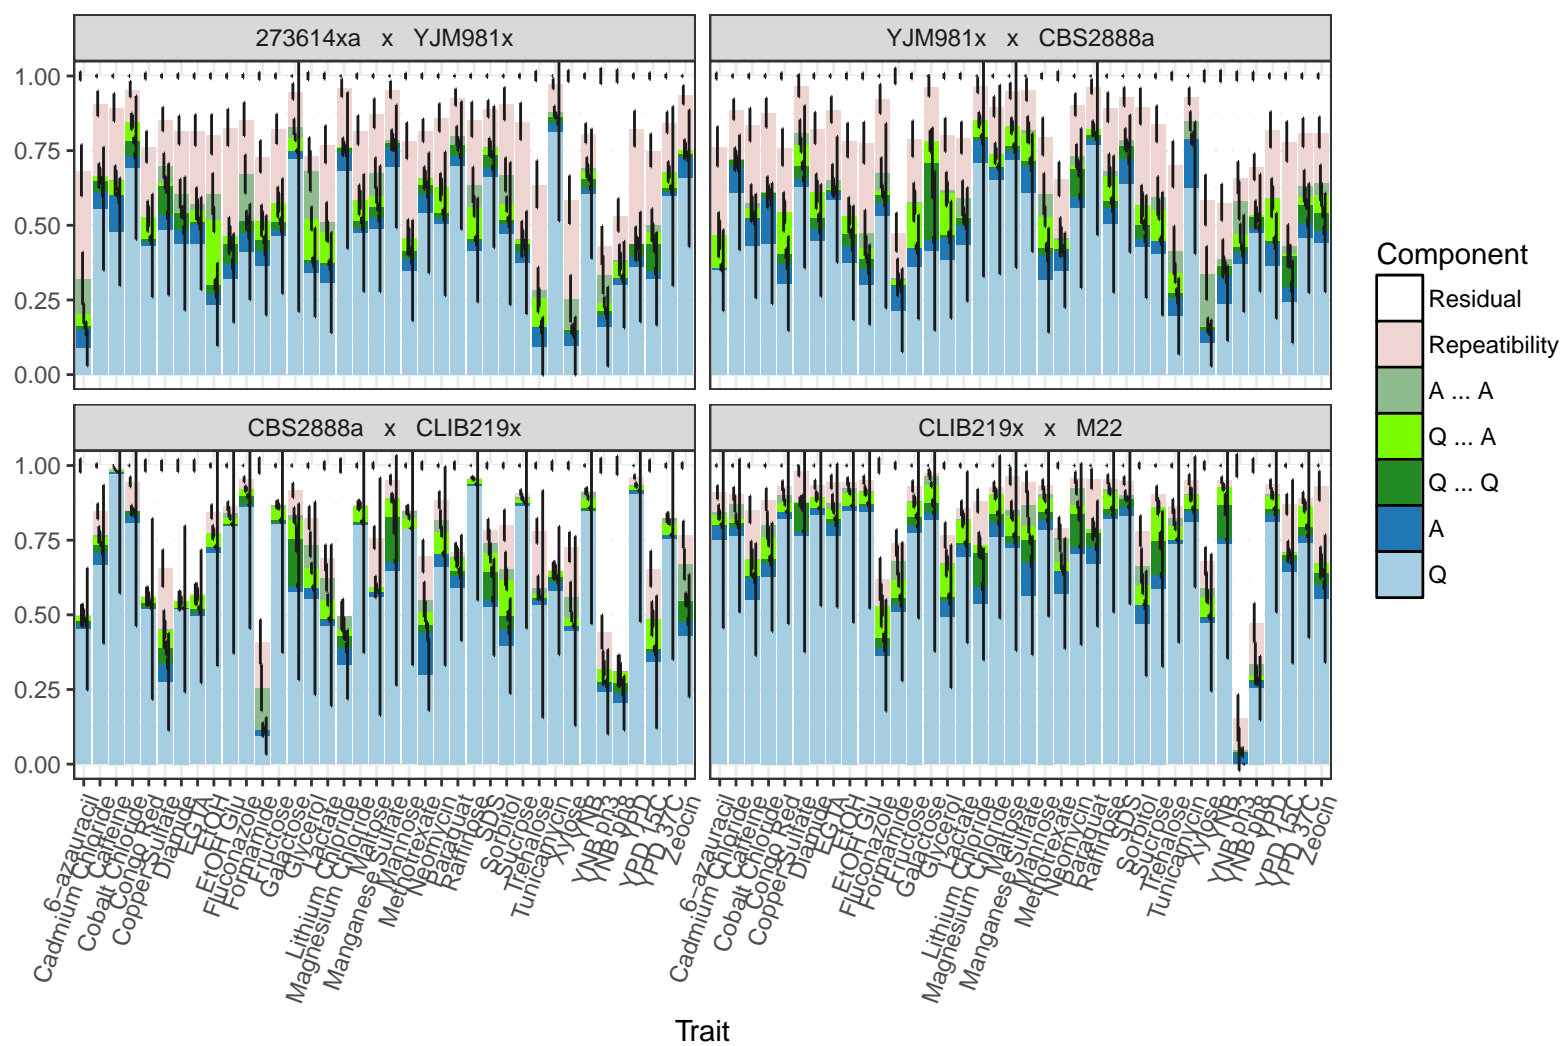

Supplement: supp [file elife_poa_e49212_Supplementary_file_2.pdf › elife_poa_e49212_Supplementary_file_2.pdf]
