# Supplementary material for: Rare variants contribute disproportionately to quantitative trait variation in yeast
Source: eLife. 2019 Oct 24;8:e49212. doi: 10.7554/eLife.49212 (PMC6892613; doi:10.7554/eLife.49212)
Supplement: Supplementary file 1. [file elife-49212-supp1.xlsx]

## Sheet: Sheet1
Reagent type (species or resource)	Designation	Source or reference	Identifiers	Additional Information
chemical compound, drug	6-azauracil	Sigma Aldrich	A1757-5G	See Source Data 1
chemical compound, drug	Cadmium chloride	Sigma Aldrich	202908-10G	See Source Data 1
chemical compound, drug	Caffeine	Sigma Aldrich	C0750	See Source Data 1
chemical compound, drug	Cobalt Chloride	Sigma Aldrich	60818-50G	See Source Data 1
chemical compound, drug	Congo Red	Sigma Aldrich	C6277-25G	See Source Data 1
chemical compound, drug	Diamide	Sigma Aldrich	D3648-1G	See Source Data 1
chemical compound, drug	EGTA	Sigma Aldrich	E0396-25G	See Source Data 1
chemical compound, drug	Fluconazole	Sigma Aldrich	F8929-100MG	See Source Data 1
chemical compound, drug	Formamide	Sigma Aldrich	F9037-100ML	See Source Data 1
chemical compound, drug	Lithium Chloride	Sigma Aldrich	L4408	See Source Data 1
chemical compound, drug	Methotrexate	Sigma Aldrich	M9929-100MG	See Source Data 1
chemical compound, drug	Neomycin	Sigma Aldrich	N5285	See Source Data 1
chemical compound, drug	Paraquat	Sigma Aldrich	36541-100MG	See Source Data 1
chemical compound, drug	SDS	Sigma Aldrich	71736	See Source Data 1
chemical compound, drug	Tunicamycin	Sigma Aldrich	T7765-5MG	See Source Data 1
chemical compound, drug	Zeocin	Life Technologies	R250-01 (1G)	See Source Data 1
chemical compound, drug	Copper sulfate	Sigma Aldrich	C8027	See Source Data 1
chemical compound, drug	Magnesium Chloride	Sigma Aldrich	M8266-100g	See Source Data 1
chemical compound, drug	Manganese Sulfate	Sigma Aldrich	M7634, M1144	See Source Data 1
chemical compound, drug	Fructose	Sigma Aldrich	3510	See Source Data 1
chemical compound, drug	Galactose	Sigma Aldrich	G0625	See Source Data 1
chemical compound, drug	Lactate	Fisher Scientific	A162	See Source Data 1
chemical compound, drug	Maltose	Sigma Aldrich	M5895	See Source Data 1
chemical compound, drug	Mannose	Sigma Aldrich	M6020	See Source Data 1
chemical compound, drug	Raffinose	Sigma Aldrich	R0250-100g	See Source Data 1
chemical compound, drug	Sucrose	Sigma Aldrich	S0389	See Source Data 1
chemical compound, drug	Trehalose	Sigma Aldrich	T9531	See Source Data 1
chemical compound, drug	Xylose	Sigma Aldrich	X1500	See Source Data 1
recombinant DNA reagent	MF2 p41Nat (plasmid)	Treusch et al. 2015	Addgene #58563
recombinant DNA reagent	MF2 p41Neo (plasmid)	Treusch et al. 2015	Addgene #58564
Strain, strain background (S. cerevisiae)	yST375	This paper		Diploid hyrbid, see source data 1 for more information
Strain, strain background (S. cerevisiae)	YLK1993	Bloom et al. 2013		Diploid hyrbid, see source data 1 for more information
Strain, strain background (S. cerevisiae)	yST376	This paper		Diploid hyrbid, see source data 1 for more information
Strain, strain background (S. cerevisiae)	YLK2444	This paper		Diploid hyrbid, see source data 1 for more information
Strain, strain background (S. cerevisiae)	yST377	This paper		Diploid hyrbid, see source data 1 for more information
Strain, strain background (S. cerevisiae)	yST393	This paper		Diploid hyrbid, see source data 1 for more information
Strain, strain background (S. cerevisiae)	yST381	This paper		Diploid hyrbid, see source data 1 for more information
Strain, strain background (S. cerevisiae)	YLK3008	This paper		Diploid hyrbid, see source data 1 for more information
Strain, strain background (S. cerevisiae)	YLK2999	This paper		Diploid hyrbid, see source data 1 for more information
Strain, strain background (S. cerevisiae)	YLK3000	This paper		Diploid hyrbid, see source data 1 for more information
Strain, strain background (S. cerevisiae)	YLK3001	This paper		Diploid hyrbid, see source data 1 for more information
Strain, strain background (S. cerevisiae)	YLK3049	This paper		Diploid hyrbid, see source data 1 for more information
Strain, strain background (S. cerevisiae)	YLK3003	This paper		Diploid hyrbid, see source data 1 for more information
Strain, strain background (S. cerevisiae)	YLK3004	This paper		Diploid hyrbid, see source data 1 for more information
Strain, strain background (S. cerevisiae)	YLK3043	This paper		Diploid hyrbid, see source data 1 for more information
Strain, strain background (S. cerevisiae)	YLK3028	This paper		Diploid hyrbid, see source data 1 for more information
Strain, strain background (S. cerevisiae)	273614 MatA ho∆::KanMX (yST133)	This paper	YST133	parental haploid, see source data 1 for more information
Strain, strain background (S. cerevisiae)	BY MatA (YLK1879)	Bloom et al. 2013	YLK1879	parental haploid, see source data 1 for more information
Strain, strain background (S. cerevisiae)	CBS2888 MatA ho∆::KanMX (Box A1 C3)	Treusch et al. 2015	Kruglyak collection Yeast Rack A: BOX A1 C3	parental haploid, see source data 1 for more information
Strain, strain background (S. cerevisiae)	Clib219 MatAlpha ho∆::HphMX (yST195)	Treusch et al. 2015	YST195	parental haploid, see source data 1 for more information
Strain, strain background (S. cerevisiae)	Clib413 MatA ho∆::KanMX (BoxA1 D3)	This paper	Kruglyak collection Yeast Rack A: BOXA1 D3	parental haploid, see source data 1 for more information
Strain, strain background (S. cerevisiae)	I14 MatA ho∆::KanMX (BoxA1 E4)	Treusch et al. 2015	Kruglyak collection Yeast Rack A: BOXA1 E4	parental haploid, see source data 1 for more information
Strain, strain background (S. cerevisiae)	M22 MatA ho∆::KanMX (Box A1 E5)	Treusch et al. 2015	Kruglyak collection Yeast Rack A: BOX A1 E5	parental haploid, see source data 1 for more information
Strain, strain background (S. cerevisiae)	M22 MatAlpha dHO::HphMX 4 (YST331)	This paper	YST331	parental haploid, see source data 1 for more information
Strain, strain background (S. cerevisiae)	PW5 MatA ho∆::KanMX (BoxA1 F4)	Treusch et al. 2015	Kruglyak collection Yeast Rack A: BOXA1 F4	parental haploid, see source data 1 for more information
Strain, strain background (S. cerevisiae)	PW5 MatAlpha ho∆::HphMX (yST235)	Treusch et al. 2015	YST235	parental haploid, see source data 1 for more information
Strain, strain background (S. cerevisiae)	RM MatAlpha AMN1-BY ho∆::HphMX flo8∆::NatMX (YLK1950)	Bloom et al. 2013	YLK1950	parental haploid, see source data 1 for more information
Strain, strain background (S. cerevisiae)	Y10 MatAlpha ho∆::HphMX (yST170)	Treusch et al. 2015	YST170	parental haploid, see source data 1 for more information
Strain, strain background (S. cerevisiae)	YJM145 MatAlpha ho∆::HphMX flo8∆::NatMX (yST176)	This paper	YST176	parental haploid, see source data 1 for more information
Strain, strain background (S. cerevisiae)	YJM454 MatA ho∆::KanMX (BoxA1 B9)	Treusch et al. 2015	Kruglyak collection Yeast Rack A: BOXA1 B9	parental haploid, see source data 1 for more information
Strain, strain background (S. cerevisiae)	YJM978 MatAlpha ho∆::HphMX (yST317)	This paper	YST317	parental haploid, see source data 1 for more information
Strain, strain background (S. cerevisiae)	YJM981 MatAlpha ho∆::HphMX (yST191)	Treusch et al. 2015	YST191	parental haploid, see source data 1 for more information
Strain, strain background (S. cerevisiae)	YPS1009 MatAlpha ho∆::HphMX (yST186)	Treusch et al. 2015	YST186	parental haploid, see source data 1 for more information
Strain, strain background (S. cerevisiae)	YPS163 MatA ho∆::HphMX flo8∆::NatMX (YLK2438)	This paper	YLK2438	parental haploid, see source data 1 for more information
Sequence-based reagent	N5XX nextera compatible primer 1	This paper	INI_A1_1	AATGATACGGCGACCACCGAGATCTACACtcgcaggTCGTCGGCAGCGTC
Sequence-based reagent	N5XX nextera compatible primer 2	This paper	INI_A1_2	AATGATACGGCGACCACCGAGATCTACACctctgcaTCGTCGGCAGCGTC
Sequence-based reagent	N5XX nextera compatible primer 3	This paper	INI_A1_3	AATGATACGGCGACCACCGAGATCTACACcctaggtTCGTCGGCAGCGTC
Sequence-based reagent	N5XX nextera compatible primer 4	This paper	INI_A1_4	AATGATACGGCGACCACCGAGATCTACACggatcaaTCGTCGGCAGCGTC
Sequence-based reagent	N5XX nextera compatible primer 5	This paper	INI_A1_5	AATGATACGGCGACCACCGAGATCTACACgcaagatTCGTCGGCAGCGTC
Sequence-based reagent	N5XX nextera compatible primer 6	This paper	INI_A1_6	AATGATACGGCGACCACCGAGATCTACACatggagaTCGTCGGCAGCGTC
Sequence-based reagent	N5XX nextera compatible primer 7	This paper	INI_A1_7	AATGATACGGCGACCACCGAGATCTACACctcgatgTCGTCGGCAGCGTC
Sequence-based reagent	N5XX nextera compatible primer 8	This paper	INI_A1_8	AATGATACGGCGACCACCGAGATCTACACgctcgaaTCGTCGGCAGCGTC
Sequence-based reagent	N5XX nextera compatible primer 9	This paper	INI_A1_9	AATGATACGGCGACCACCGAGATCTACACaccaactTCGTCGGCAGCGTC
Sequence-based reagent	N5XX nextera compatible primer 10	This paper	INI_A1_10	AATGATACGGCGACCACCGAGATCTACACccggtacTCGTCGGCAGCGTC
Sequence-based reagent	N5XX nextera compatible primer 11	This paper	INI_A1_11	AATGATACGGCGACCACCGAGATCTACACaactccgTCGTCGGCAGCGTC
Sequence-based reagent	N5XX nextera compatible primer 12	This paper	INI_A1_12	AATGATACGGCGACCACCGAGATCTACACttgaagtTCGTCGGCAGCGTC
Sequence-based reagent	N5XX nextera compatible primer 13	This paper	INI_A1_13	AATGATACGGCGACCACCGAGATCTACACactatcaTCGTCGGCAGCGTC
Sequence-based reagent	N5XX nextera compatible primer 14	This paper	INI_A1_14	AATGATACGGCGACCACCGAGATCTACACttggatcTCGTCGGCAGCGTC
Sequence-based reagent	N5XX nextera compatible primer 15	This paper	INI_A1_15	AATGATACGGCGACCACCGAGATCTACACcgacctgTCGTCGGCAGCGTC
Sequence-based reagent	N5XX nextera compatible primer 16	This paper	INI_A1_16	AATGATACGGCGACCACCGAGATCTACACtaatgcgTCGTCGGCAGCGTC
Sequence-based reagent	N5XX nextera compatible primer 17	This paper	INI_A1_17	AATGATACGGCGACCACCGAGATCTACACaggtaccTCGTCGGCAGCGTC
Sequence-based reagent	N5XX nextera compatible primer 18	This paper	INI_A1_18	AATGATACGGCGACCACCGAGATCTACACtgcgtccTCGTCGGCAGCGTC
Sequence-based reagent	N5XX nextera compatible primer 19	This paper	INI_A1_19	AATGATACGGCGACCACCGAGATCTACACgaatctcTCGTCGGCAGCGTC
Sequence-based reagent	N5XX nextera compatible primer 20	This paper	INI_A1_20	AATGATACGGCGACCACCGAGATCTACACcatgctcTCGTCGGCAGCGTC
Sequence-based reagent	N5XX nextera compatible primer 21	This paper	INI_A1_21	AATGATACGGCGACCACCGAGATCTACACacgcaacTCGTCGGCAGCGTC
Sequence-based reagent	N5XX nextera compatible primer 22	This paper	INI_A1_22	AATGATACGGCGACCACCGAGATCTACACgcattggTCGTCGGCAGCGTC
Sequence-based reagent	N5XX nextera compatible primer 23	This paper	INI_A1_23	AATGATACGGCGACCACCGAGATCTACACgatctcgTCGTCGGCAGCGTC
Sequence-based reagent	N5XX nextera compatible primer 24	This paper	INI_A1_24	AATGATACGGCGACCACCGAGATCTACACcaatatgTCGTCGGCAGCGTC
Sequence-based reagent	N5XX nextera compatible primer 25	This paper	INI_A1_25	AATGATACGGCGACCACCGAGATCTACACtgacgtcTCGTCGGCAGCGTC
Sequence-based reagent	N5XX nextera compatible primer 26	This paper	INI_A1_26	AATGATACGGCGACCACCGAGATCTACACgatgccaTCGTCGGCAGCGTC
Sequence-based reagent	N5XX nextera compatible primer 27	This paper	INI_A1_27	AATGATACGGCGACCACCGAGATCTACACcaattacTCGTCGGCAGCGTC
Sequence-based reagent	N5XX nextera compatible primer 28	This paper	INI_A1_28	AATGATACGGCGACCACCGAGATCTACACagataggTCGTCGGCAGCGTC
Sequence-based reagent	N5XX nextera compatible primer 29	This paper	INI_A1_29	AATGATACGGCGACCACCGAGATCTACACccgattgTCGTCGGCAGCGTC
Sequence-based reagent	N5XX nextera compatible primer 30	This paper	INI_A1_30	AATGATACGGCGACCACCGAGATCTACACatgccgcTCGTCGGCAGCGTC
Sequence-based reagent	N5XX nextera compatible primer 31	This paper	INI_A1_31	AATGATACGGCGACCACCGAGATCTACACcagtactTCGTCGGCAGCGTC
Sequence-based reagent	N5XX nextera compatible primer 32	This paper	INI_A1_32	AATGATACGGCGACCACCGAGATCTACACaatagtaTCGTCGGCAGCGTC
Sequence-based reagent	N5XX nextera compatible primer 33	This paper	INI_A1_33	AATGATACGGCGACCACCGAGATCTACACcatccggTCGTCGGCAGCGTC
Sequence-based reagent	N5XX nextera compatible primer 34	This paper	INI_A1_34	AATGATACGGCGACCACCGAGATCTACACtcatggtTCGTCGGCAGCGTC
Sequence-based reagent	N5XX nextera compatible primer 35	This paper	INI_A1_35	AATGATACGGCGACCACCGAGATCTACACagaaccgTCGTCGGCAGCGTC
Sequence-based reagent	N5XX nextera compatible primer 36	This paper	INI_A1_36	AATGATACGGCGACCACCGAGATCTACACtggaataTCGTCGGCAGCGTC
Sequence-based reagent	N5XX nextera compatible primer 37	This paper	INI_A1_37	AATGATACGGCGACCACCGAGATCTACACcaggaggTCGTCGGCAGCGTC
Sequence-based reagent	N5XX nextera compatible primer 38	This paper	INI_A1_38	AATGATACGGCGACCACCGAGATCTACACaatacctTCGTCGGCAGCGTC
Sequence-based reagent	N5XX nextera compatible primer 39	This paper	INI_A1_39	AATGATACGGCGACCACCGAGATCTACACcgaatgcTCGTCGGCAGCGTC
Sequence-based reagent	N5XX nextera compatible primer 40	This paper	INI_A1_40	AATGATACGGCGACCACCGAGATCTACACttcgcaaTCGTCGGCAGCGTC
Sequence-based reagent	N5XX nextera compatible primer 41	This paper	INI_A1_41	AATGATACGGCGACCACCGAGATCTACACaattcaaTCGTCGGCAGCGTC
Sequence-based reagent	N5XX nextera compatible primer 42	This paper	INI_A1_42	AATGATACGGCGACCACCGAGATCTACACcgcgcagTCGTCGGCAGCGTC
Sequence-based reagent	N5XX nextera compatible primer 43	This paper	INI_A1_43	AATGATACGGCGACCACCGAGATCTACACaaggtctTCGTCGGCAGCGTC
Sequence-based reagent	N5XX nextera compatible primer 44	This paper	INI_A1_44	AATGATACGGCGACCACCGAGATCTACACactggacTCGTCGGCAGCGTC
Sequence-based reagent	N5XX nextera compatible primer 45	This paper	INI_A1_45	AATGATACGGCGACCACCGAGATCTACACagcaggtTCGTCGGCAGCGTC
Sequence-based reagent	N5XX nextera compatible primer 46	This paper	INI_A1_46	AATGATACGGCGACCACCGAGATCTACACgtaccggTCGTCGGCAGCGTC
Sequence-based reagent	N5XX nextera compatible primer 47	This paper	INI_A1_47	AATGATACGGCGACCACCGAGATCTACACggtcaagTCGTCGGCAGCGTC
Sequence-based reagent	N5XX nextera compatible primer 48	This paper	INI_A1_48	AATGATACGGCGACCACCGAGATCTACACaatgatgTCGTCGGCAGCGTC
Sequence-based reagent	N5XX nextera compatible primer 49	This paper	INI_A1_49	AATGATACGGCGACCACCGAGATCTACACagtcagaTCGTCGGCAGCGTC
Sequence-based reagent	N5XX nextera compatible primer 50	This paper	INI_A1_50	AATGATACGGCGACCACCGAGATCTACACaactagaTCGTCGGCAGCGTC
Sequence-based reagent	N5XX nextera compatible primer 51	This paper	INI_A1_51	AATGATACGGCGACCACCGAGATCTACACctatggcTCGTCGGCAGCGTC
Sequence-based reagent	N5XX nextera compatible primer 52	This paper	INI_A1_52	AATGATACGGCGACCACCGAGATCTACACcgacggtTCGTCGGCAGCGTC
Sequence-based reagent	N5XX nextera compatible primer 53	This paper	INI_A1_53	AATGATACGGCGACCACCGAGATCTACACaaccaagTCGTCGGCAGCGTC
Sequence-based reagent	N5XX nextera compatible primer 54	This paper	INI_A1_54	AATGATACGGCGACCACCGAGATCTACACcggcgtaTCGTCGGCAGCGTC
Sequence-based reagent	N5XX nextera compatible primer 55	This paper	INI_A1_55	AATGATACGGCGACCACCGAGATCTACACgcagtccTCGTCGGCAGCGTC
Sequence-based reagent	N5XX nextera compatible primer 56	This paper	INI_A1_56	AATGATACGGCGACCACCGAGATCTACACctcgcgcTCGTCGGCAGCGTC
Sequence-based reagent	N5XX nextera compatible primer 57	This paper	INI_A1_57	AATGATACGGCGACCACCGAGATCTACACctgcgacTCGTCGGCAGCGTC
Sequence-based reagent	N5XX nextera compatible primer 58	This paper	INI_A1_58	AATGATACGGCGACCACCGAGATCTACACacgtatgTCGTCGGCAGCGTC
Sequence-based reagent	N5XX nextera compatible primer 59	This paper	INI_A1_59	AATGATACGGCGACCACCGAGATCTACACatactgaTCGTCGGCAGCGTC
Sequence-based reagent	N5XX nextera compatible primer 60	This paper	INI_A1_60	AATGATACGGCGACCACCGAGATCTACACtacttagTCGTCGGCAGCGTC
Sequence-based reagent	N5XX nextera compatible primer 61	This paper	INI_A1_61	AATGATACGGCGACCACCGAGATCTACACaagctaaTCGTCGGCAGCGTC
Sequence-based reagent	N5XX nextera compatible primer 62	This paper	INI_A1_62	AATGATACGGCGACCACCGAGATCTACACgacggcgTCGTCGGCAGCGTC
Sequence-based reagent	N5XX nextera compatible primer 63	This paper	INI_A1_63	AATGATACGGCGACCACCGAGATCTACACagaagacTCGTCGGCAGCGTC
Sequence-based reagent	N5XX nextera compatible primer 64	This paper	INI_A1_64	AATGATACGGCGACCACCGAGATCTACACgtccggcTCGTCGGCAGCGTC
Sequence-based reagent	N5XX nextera compatible primer 65	This paper	INI_A1_65	AATGATACGGCGACCACCGAGATCTACACtcagcttTCGTCGGCAGCGTC
Sequence-based reagent	N5XX nextera compatible primer 66	This paper	INI_A1_66	AATGATACGGCGACCACCGAGATCTACACagagcgcTCGTCGGCAGCGTC
Sequence-based reagent	N5XX nextera compatible primer 67	This paper	INI_A1_67	AATGATACGGCGACCACCGAGATCTACACgcctacgTCGTCGGCAGCGTC
Sequence-based reagent	N5XX nextera compatible primer 68	This paper	INI_A1_68	AATGATACGGCGACCACCGAGATCTACACtaatcatTCGTCGGCAGCGTC
Sequence-based reagent	N5XX nextera compatible primer 69	This paper	INI_A1_69	AATGATACGGCGACCACCGAGATCTACACaacctgcTCGTCGGCAGCGTC
Sequence-based reagent	N5XX nextera compatible primer 70	This paper	INI_A1_70	AATGATACGGCGACCACCGAGATCTACACgacgattTCGTCGGCAGCGTC
Sequence-based reagent	N5XX nextera compatible primer 71	This paper	INI_A1_71	AATGATACGGCGACCACCGAGATCTACACtaggccgTCGTCGGCAGCGTC
Sequence-based reagent	N5XX nextera compatible primer 72	This paper	INI_A1_72	AATGATACGGCGACCACCGAGATCTACACggcatagTCGTCGGCAGCGTC
Sequence-based reagent	N5XX nextera compatible primer 73	This paper	INI_A1_73	AATGATACGGCGACCACCGAGATCTACACttcaaccTCGTCGGCAGCGTC
Sequence-based reagent	N5XX nextera compatible primer 74	This paper	INI_A1_74	AATGATACGGCGACCACCGAGATCTACACttaactcTCGTCGGCAGCGTC
Sequence-based reagent	N5XX nextera compatible primer 75	This paper	INI_A1_75	AATGATACGGCGACCACCGAGATCTACACtagtctaTCGTCGGCAGCGTC
Sequence-based reagent	N5XX nextera compatible primer 76	This paper	INI_A1_76	AATGATACGGCGACCACCGAGATCTACACtgcatgaTCGTCGGCAGCGTC
Sequence-based reagent	N5XX nextera compatible primer 77	This paper	INI_A1_77	AATGATACGGCGACCACCGAGATCTACACaataagcTCGTCGGCAGCGTC
Sequence-based reagent	N5XX nextera compatible primer 78	This paper	INI_A1_78	AATGATACGGCGACCACCGAGATCTACACagccttgTCGTCGGCAGCGTC
Sequence-based reagent	N5XX nextera compatible primer 79	This paper	INI_A1_79	AATGATACGGCGACCACCGAGATCTACACccaacctTCGTCGGCAGCGTC
Sequence-based reagent	N5XX nextera compatible primer 80	This paper	INI_A1_80	AATGATACGGCGACCACCGAGATCTACACgcagaagTCGTCGGCAGCGTC
Sequence-based reagent	N5XX nextera compatible primer 81	This paper	INI_A1_81	AATGATACGGCGACCACCGAGATCTACACagaattaTCGTCGGCAGCGTC
Sequence-based reagent	N5XX nextera compatible primer 82	This paper	INI_A1_82	AATGATACGGCGACCACCGAGATCTACACcagcatcTCGTCGGCAGCGTC
Sequence-based reagent	N5XX nextera compatible primer 83	This paper	INI_A1_83	AATGATACGGCGACCACCGAGATCTACACttctaggTCGTCGGCAGCGTC
Sequence-based reagent	N5XX nextera compatible primer 84	This paper	INI_A1_84	AATGATACGGCGACCACCGAGATCTACACcctctagTCGTCGGCAGCGTC
Sequence-based reagent	N5XX nextera compatible primer 85	This paper	INI_A1_85	AATGATACGGCGACCACCGAGATCTACACccggataTCGTCGGCAGCGTC
Sequence-based reagent	N5XX nextera compatible primer 86	This paper	INI_A1_86	AATGATACGGCGACCACCGAGATCTACACgccgcctTCGTCGGCAGCGTC
Sequence-based reagent	N5XX nextera compatible primer 87	This paper	INI_A1_87	AATGATACGGCGACCACCGAGATCTACACaacgaccTCGTCGGCAGCGTC
Sequence-based reagent	N5XX nextera compatible primer 88	This paper	INI_A1_88	AATGATACGGCGACCACCGAGATCTACACccagcggTCGTCGGCAGCGTC
Sequence-based reagent	N5XX nextera compatible primer 89	This paper	INI_A1_89	AATGATACGGCGACCACCGAGATCTACACtagttccTCGTCGGCAGCGTC
Sequence-based reagent	N5XX nextera compatible primer 90	This paper	INI_A1_90	AATGATACGGCGACCACCGAGATCTACACtggcaatTCGTCGGCAGCGTC
Sequence-based reagent	N5XX nextera compatible primer 91	This paper	INI_A1_91	AATGATACGGCGACCACCGAGATCTACACcgtatatTCGTCGGCAGCGTC
Sequence-based reagent	N5XX nextera compatible primer 92	This paper	INI_A1_92	AATGATACGGCGACCACCGAGATCTACACgctaatcTCGTCGGCAGCGTC
Sequence-based reagent	N5XX nextera compatible primer 93	This paper	INI_A1_93	AATGATACGGCGACCACCGAGATCTACACgacttctTCGTCGGCAGCGTC
Sequence-based reagent	N5XX nextera compatible primer 94	This paper	INI_A1_94	AATGATACGGCGACCACCGAGATCTACACgtactatTCGTCGGCAGCGTC
Sequence-based reagent	N5XX nextera compatible primer 95	This paper	INI_A1_95	AATGATACGGCGACCACCGAGATCTACACcgagatcTCGTCGGCAGCGTC
Sequence-based reagent	N5XX nextera compatible primer 96	This paper	INI_A1_96	AATGATACGGCGACCACCGAGATCTACACcgcagccTCGTCGGCAGCGTC
