# Supplementary figures and images for: Rare variants contribute disproportionately to quantitative trait variation in yeast
Source: eLife journal article supplement (doi:10.7554/elife.49212), 2019-10-24

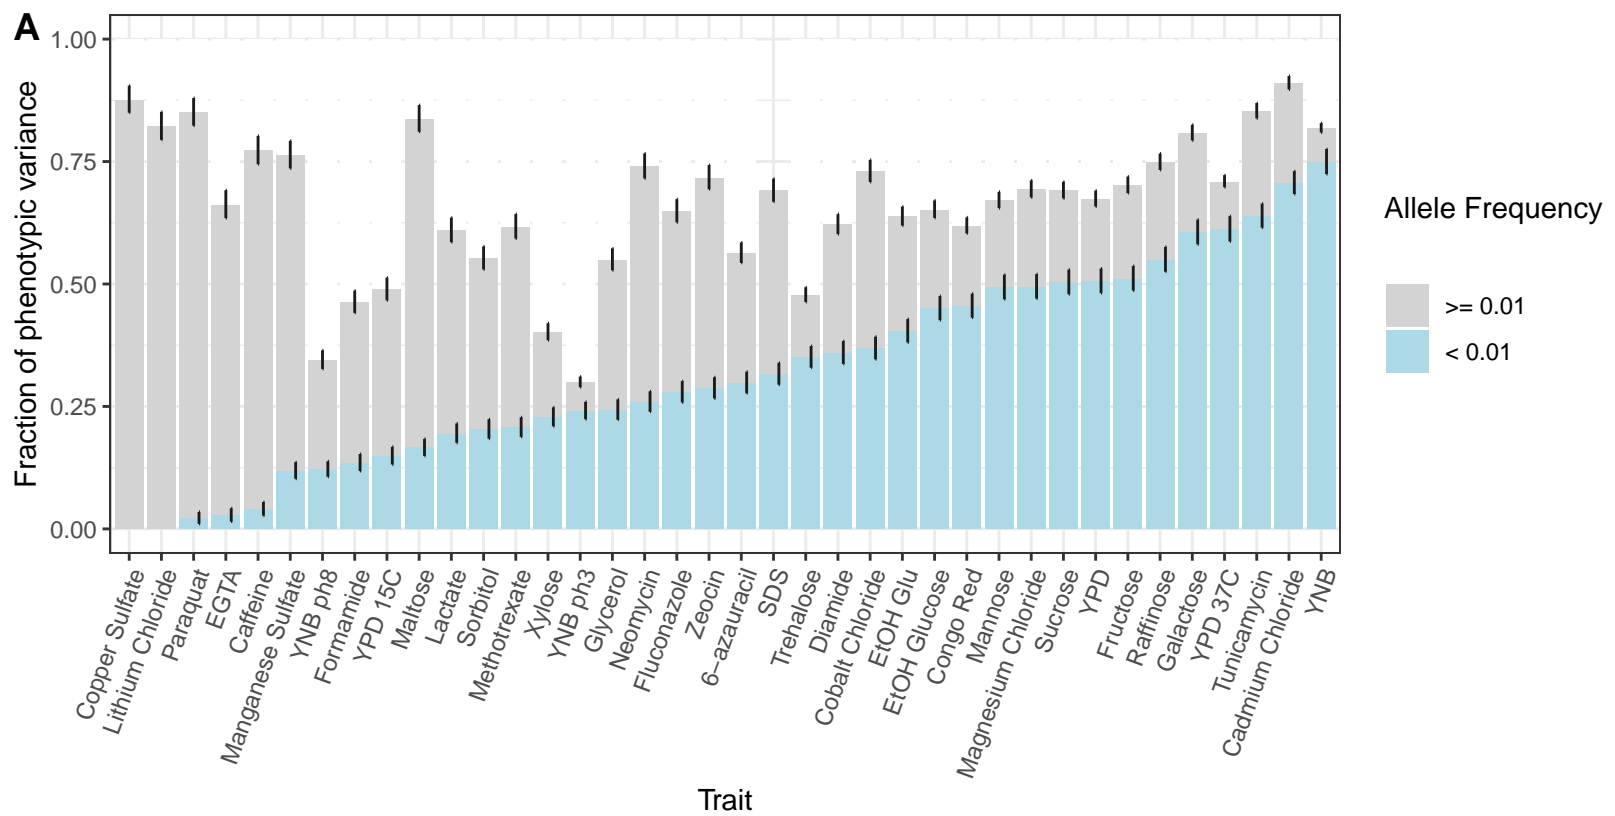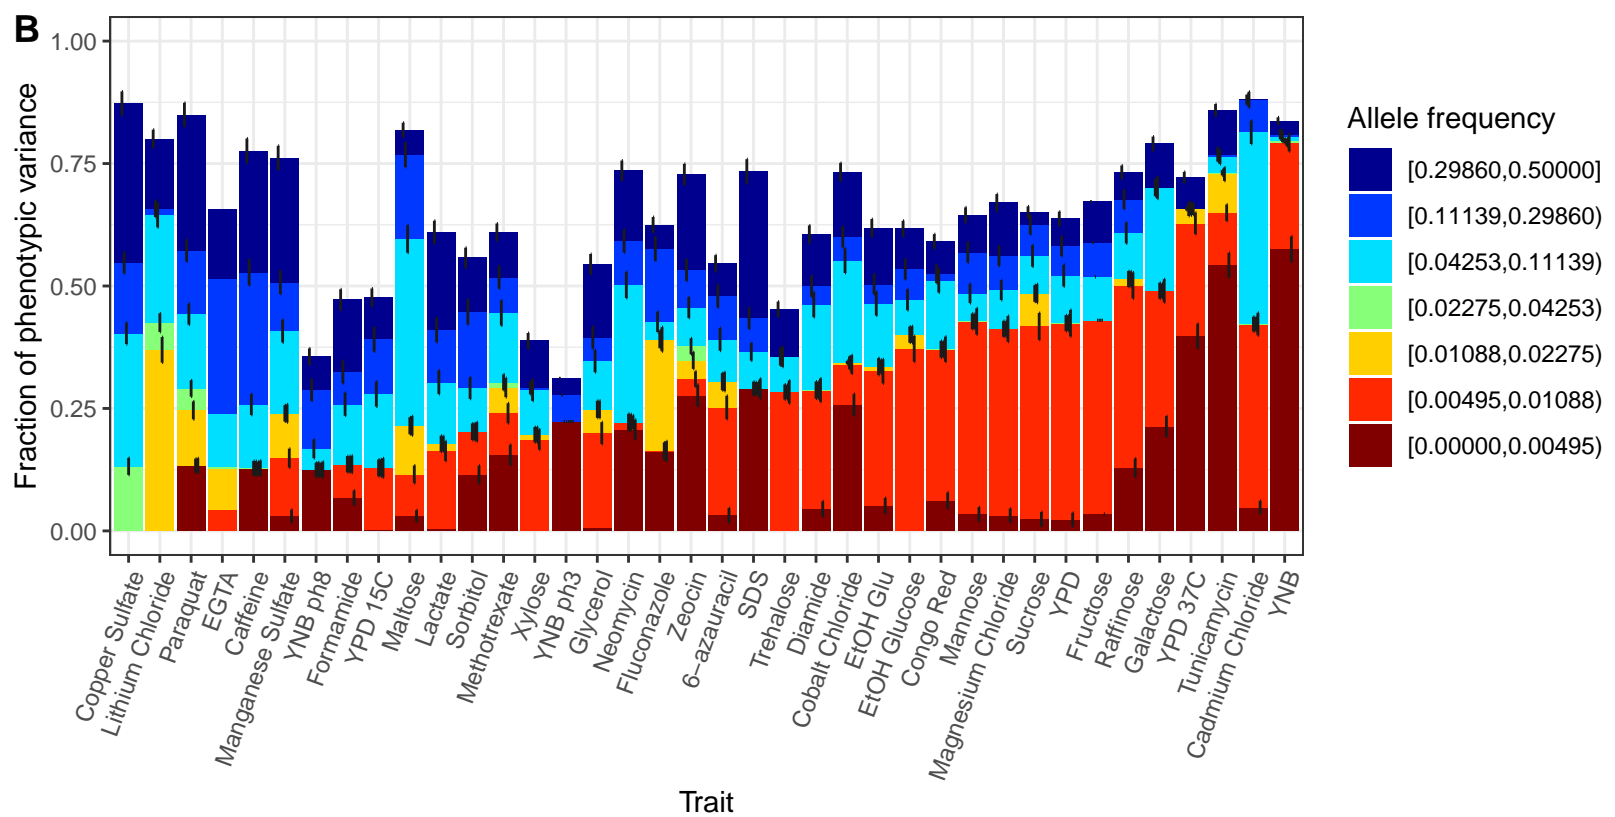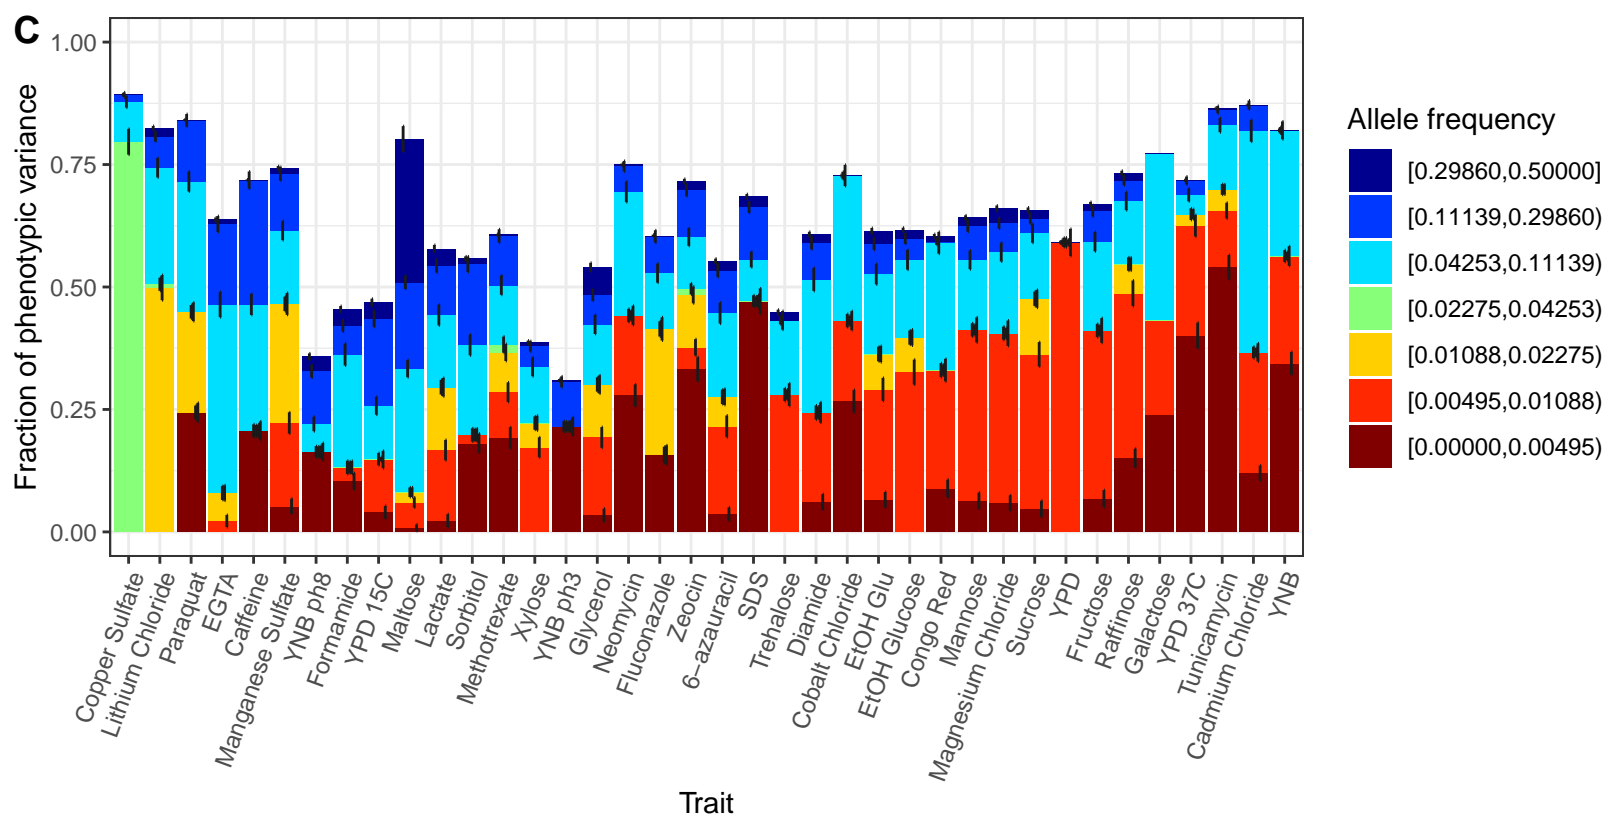

Supplement: supp [file elife_poa_e49212_Figure_3_figure_supplement_1.pdf › elife_poa_e49212_Figure_3_figure_supplement_1.pdf]

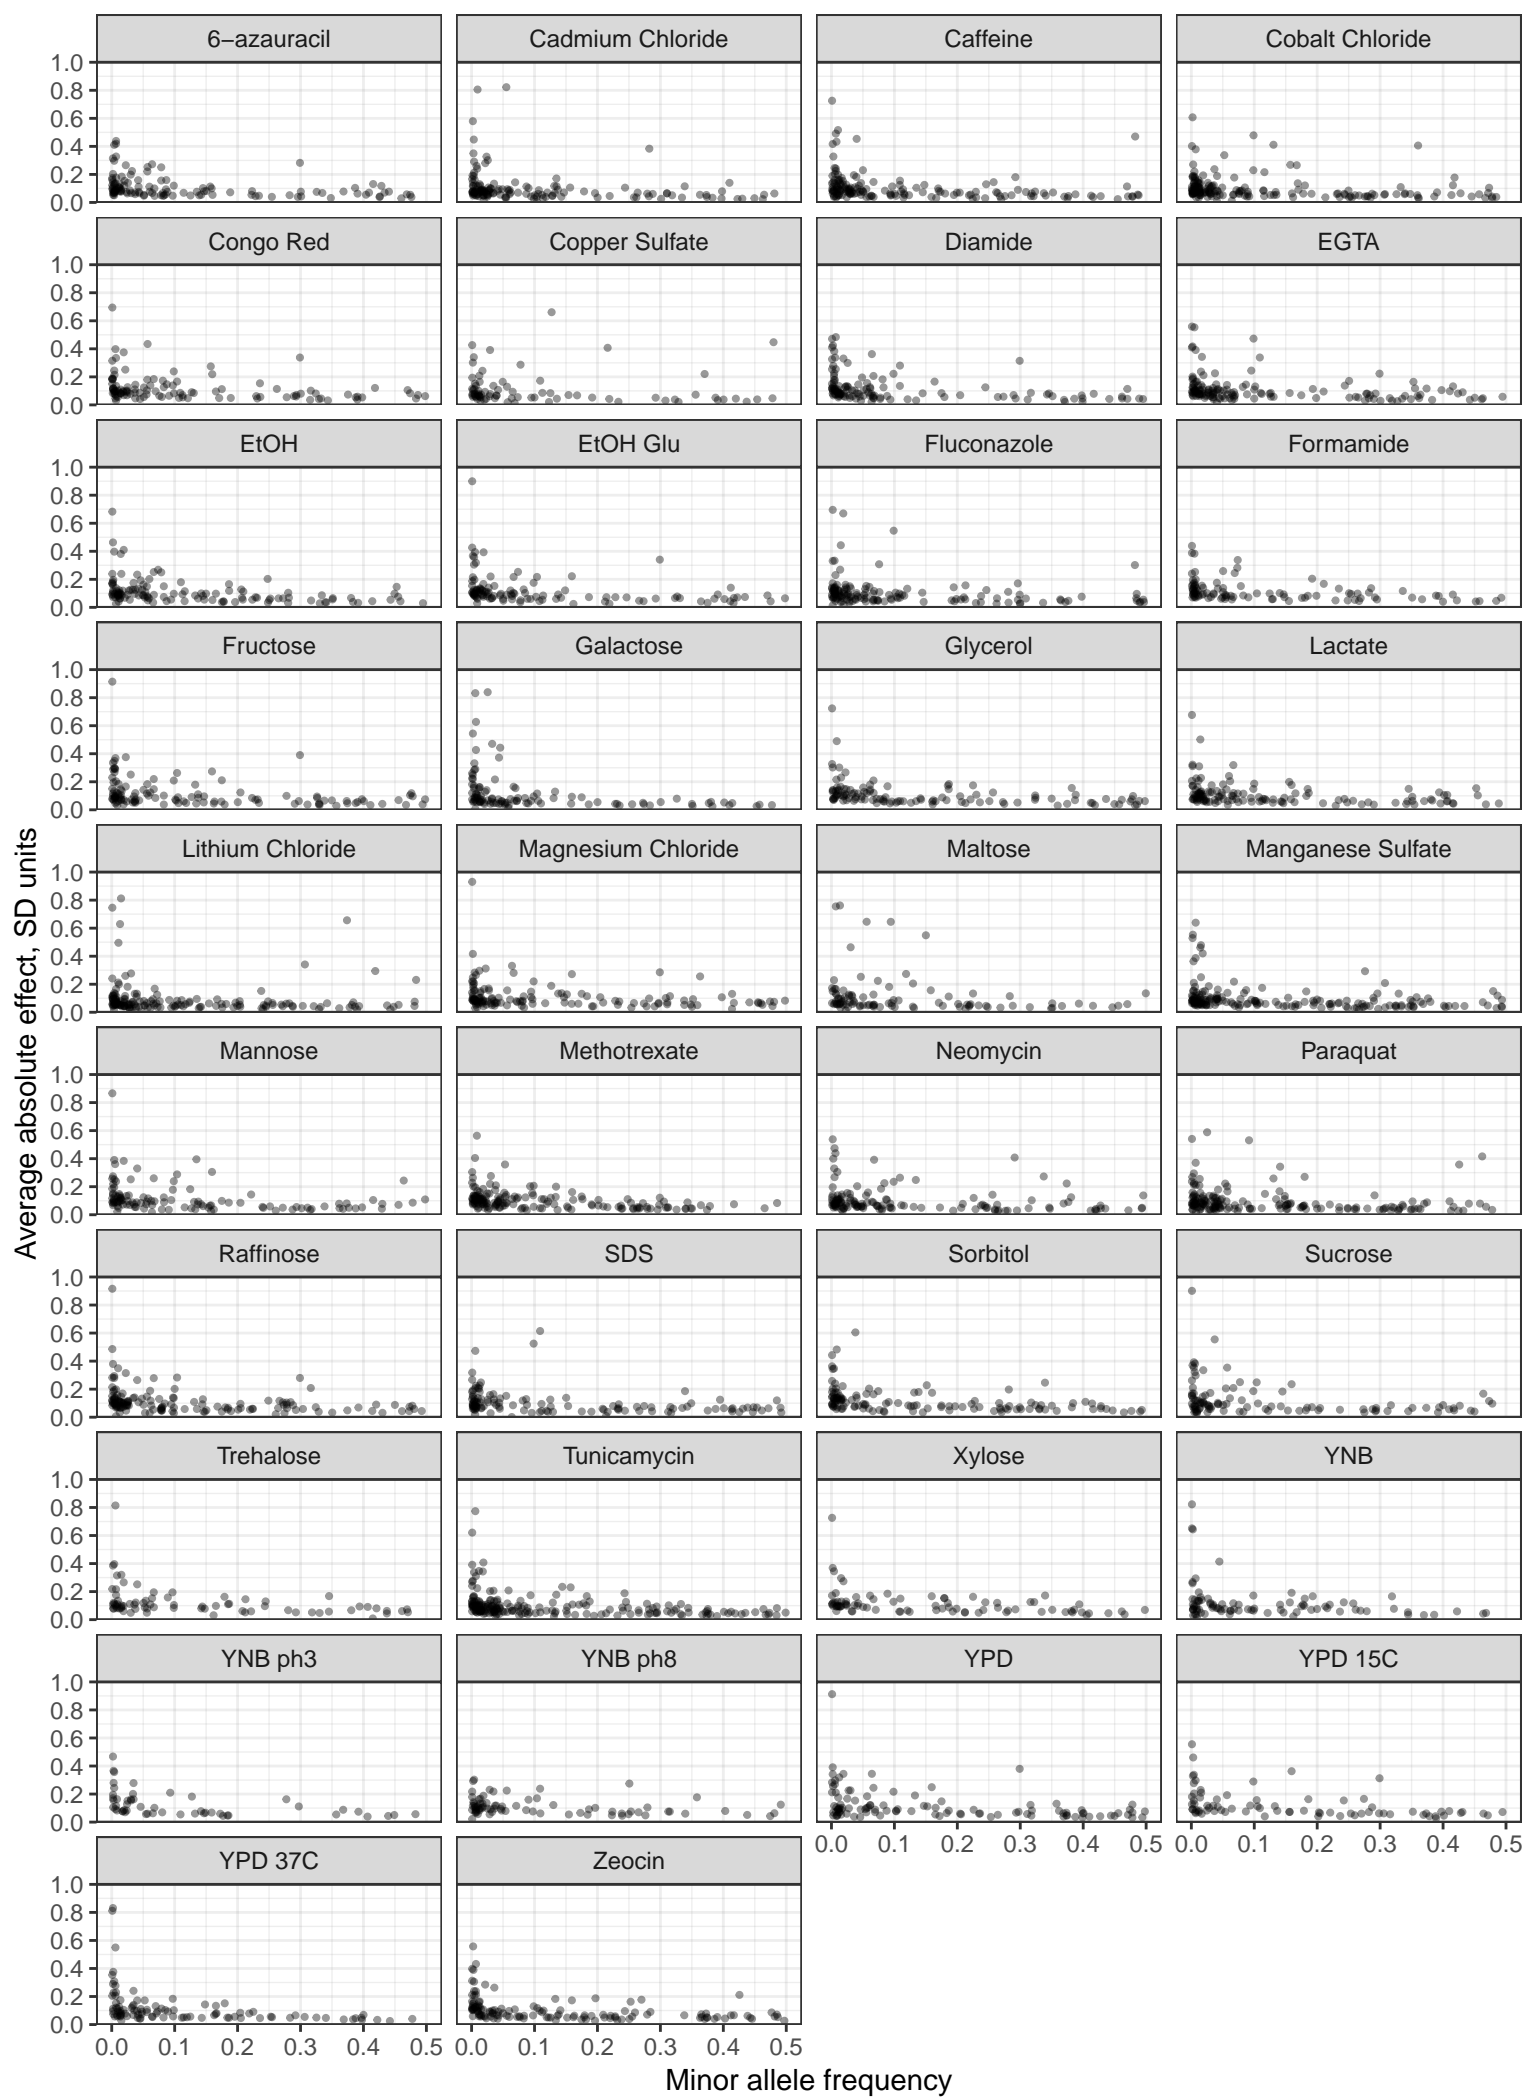

Supplement: supp [file elife_poa_e49212_Figure_3_figure_supplement_3.pdf › elife_poa_e49212_Figure_3_figure_supplement_3.pdf]

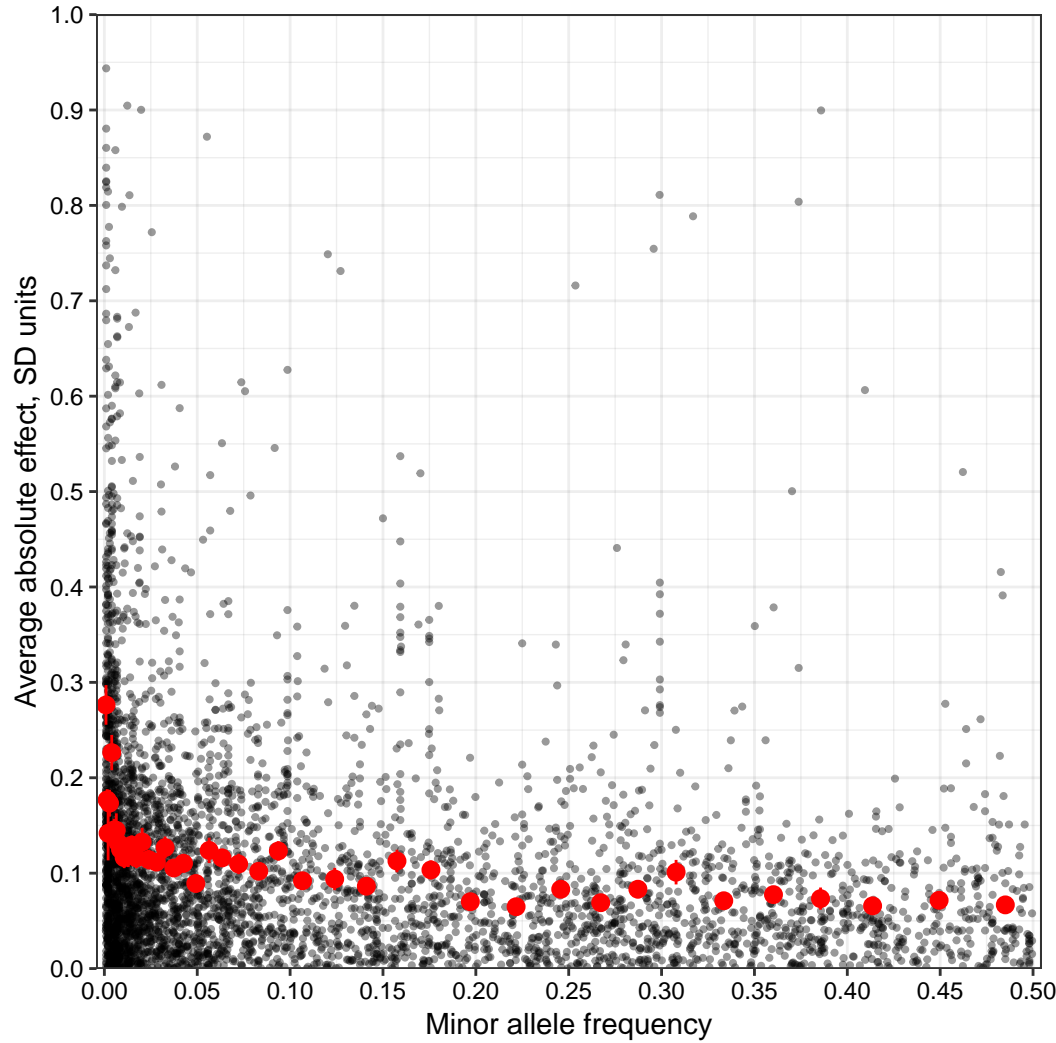

Supplement: supp [file elife_poa_e49212_Figure_3_figure_supplement_4.pdf › elife_poa_e49212_Figure_3_figure_supplement_4.pdf]

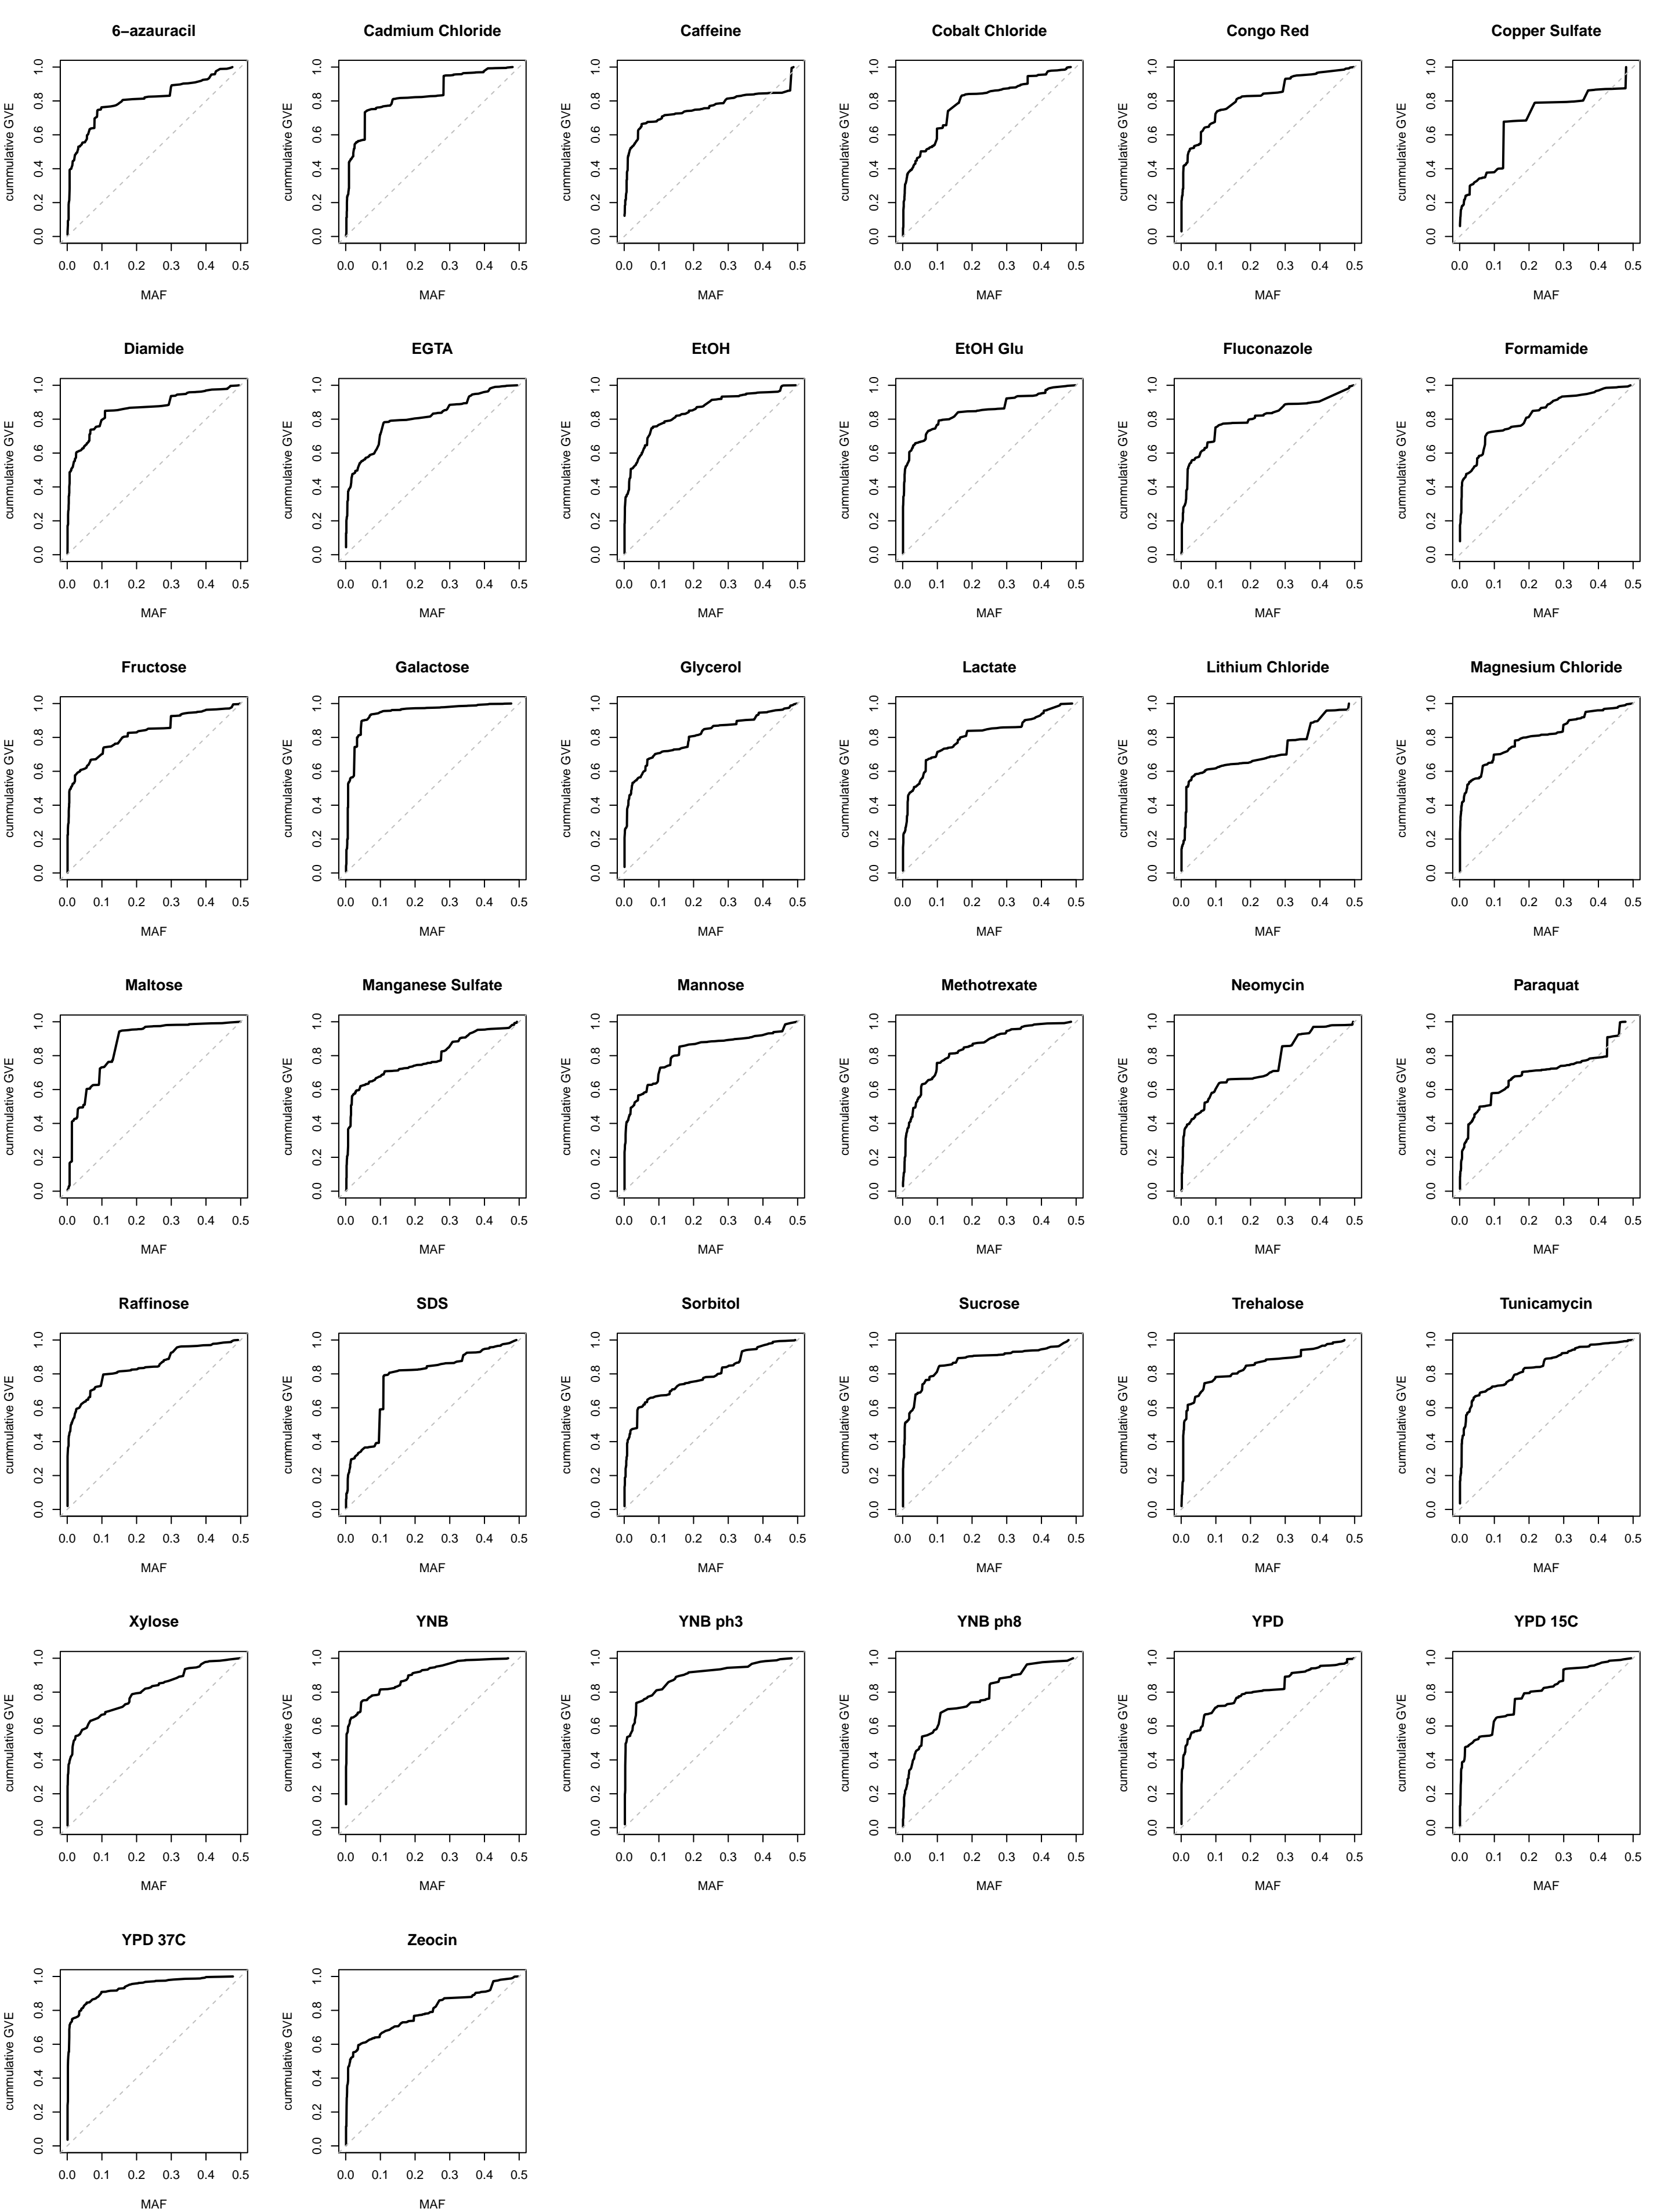

Supplement: supp [file elife_poa_e49212_Figure_3_figure_supplement_5.pdf › elife_poa_e49212_Figure_3_figure_supplement_5.pdf]
